# Supplementary material
Source: PubMed Central journal article supplement (PMC2921976)

–Supporting Information for–

**Fluorous Parallel Synthesis of a Piperazinedione-Fused Tricyclic  
Compound Library**

Stefan Werner,<sup>\*,†</sup> Simon D. Nielsen,<sup>†</sup> Peter Wipf,<sup>†</sup> David M. Turner,<sup>†</sup> Peter G. Chambers,<sup>†</sup> Steven J. Geib,<sup>†</sup> Dennis P. Curran,<sup>†</sup> and Wei Zhang<sup>\*,‡,§</sup>

<sup>†</sup>*Center for Chemical Methodologies and Library Development (UPCMLD) and  
Department of Chemistry, University of Pittsburgh, Pittsburgh PA, 15260*

<sup>‡</sup>*Fluorous Technologies, Inc., 970 William Pitt Way, Pittsburgh, Pennsylvania 15238*

<sup>§</sup>*Department of Chemistry, University of Massachusetts Boston, 100 Morrissey Boulevard,  
Boston, Massachusetts 02125*

**Table of Contents: <sup>1</sup>H and <sup>13</sup>C NMR Spectra**

| Cmd                 | Spectrum # | Page # |
|---------------------|------------|--------|
| <b>11</b> {2,2,1}   | P96        | 3      |
| <b>12</b> {1,1,1,4} | P57        | 5      |
| <b>12</b> {1,1,1,2} | P81        | 6      |
| <b>12</b> {1,1,1,5} | P86        | 7      |
| <b>12</b> {2,2,1,6} | P120       | 9      |
| <b>12</b> {1,1,1,3} | P121       | 11     |
| <b>1</b> {1,1,1,4}  | P82        | 12     |
| <b>1</b> {1,1,1,5}  | P92        | 14     |
| <b>1</b> {2,1,1,6}  | P105       | 16     |
| <b>1</b> {1,1,1,2}  | P89        | 18     |
| <b>1</b> {2,1,1,4}  | P103       | 20     |
| <b>1</b> {1,1,1,6}  | P104       | 22     |
| <b>1</b> {1,2,1,6}  | P106       | 24     |
| <b>1</b> {2,1,1,2}  | P108       | 26     |
| <b>1</b> {2,2,1,2}  | P109       | 28     |
| <b>1</b> {2,1,1,5}  | P112       | 30     |
| <b>1</b> {1,2,1,5}  | P113       | 32     |
| <b>1</b> {1,1,1,1}  | P114       | 34     |
| <b>1</b> {1,2,1,4}  | P116       | 36     |
| <b>1</b> {2,2,1,4}  | P117       | 38     |
| <b>1</b> {2,2,1,6}  | P122       | 40     |

| Cmd         | Spectrum # | Page # |
|-------------|------------|--------|
| 1{1,1,1,3}  | P123       | 42     |
| 1{1,5,3,8}  | 6268       | 44     |
| 1{1,4,2,6}  | 6154       | 46     |
| 1{1,4,2,7}  | 6152       | 48     |
| 4{2,4,2}1   | 6162F1     | 50     |
| 4{2,4,2}2   | 6162F2     | 52     |
| 4{1,5,3}    | 5216       | 54     |
| 4{1,4,3}    | 5218       | 55     |
| 4{1,3,4}    | 5262       | 56     |
| 4{1,3,3}    | 5266       | 58     |
| 4{1,5,4}    | 5280       | 60     |
| 4{1,5,2}    | 6034       | 62     |
| 4{2,3,4}    | 6052       | 63     |
| 4{1,4,4}    | 6070       | 64     |
| 4{2,5,4}    | 6092       | 65     |
| 4{2,5,2}    | 6138       | 67     |
| 1{1,4,2,8}  | 6156       | 69     |
| 4{2,4,4}    | 6164       | 71     |
| 1{1,3,2,5}  | 6184       | 72     |
| 1{1,3,2,6}  | 6190       | 74     |
| 1{1,3,3,6}  | 6200       | 76     |
| 1{1,4,3,5}  | 6212       | 78     |
| 1{1,4,3,6}  | 6218       | 80     |
| 1{1,4,2,5}  | 6168       | 82     |
| 1{1,5,4,5}  | 6228       | 84     |
| 1{1,5,4,6}  | 6230       | 86     |
| 1{1,5,4,8}  | 6232       | 88     |
| 11{2,4,2}   | 6242       | 90     |
| 12{2,4,2,5} | 6240       | 91     |
| 11{2,4,4}   | 6266       | 93     |
| 1{1,4,4,8}  | 6270       | 94     |
| 1{1,4,3,8}  | 6272       | 96     |
| 1{1,5,2,5}  | 6274       | 97     |
| 1{1,5,2,6}  | 6276       | 98     |
| 1{1,5,2,8}  | 6278       | 99     |
| 11{2,5,2}   | 7006       | 100    |
| 11{2,5,4}   | 7008       | 101    |
| 11{2,5,3}   | 7010       | 102    |
| 11{2,4,3}   | 7012       | 103    |
| 1{1,5,3,9}  | 7014       | 104    |
| 1{1,5,2,9}  | 7018       | 105    |
| 1{1,5,4,9}  | 7022       | 106    |
| 1{2,4,2,9}  | 7032       | 107    |
| 1{1,4,3,9}  | 7056       | 108    |
| 1{2,3,2,9}  | 7058       | 109    |
| 1{2,3,4,9}  | 7062       | 110    |
| 1{2,3,3,9}  | 7066       | 111    |

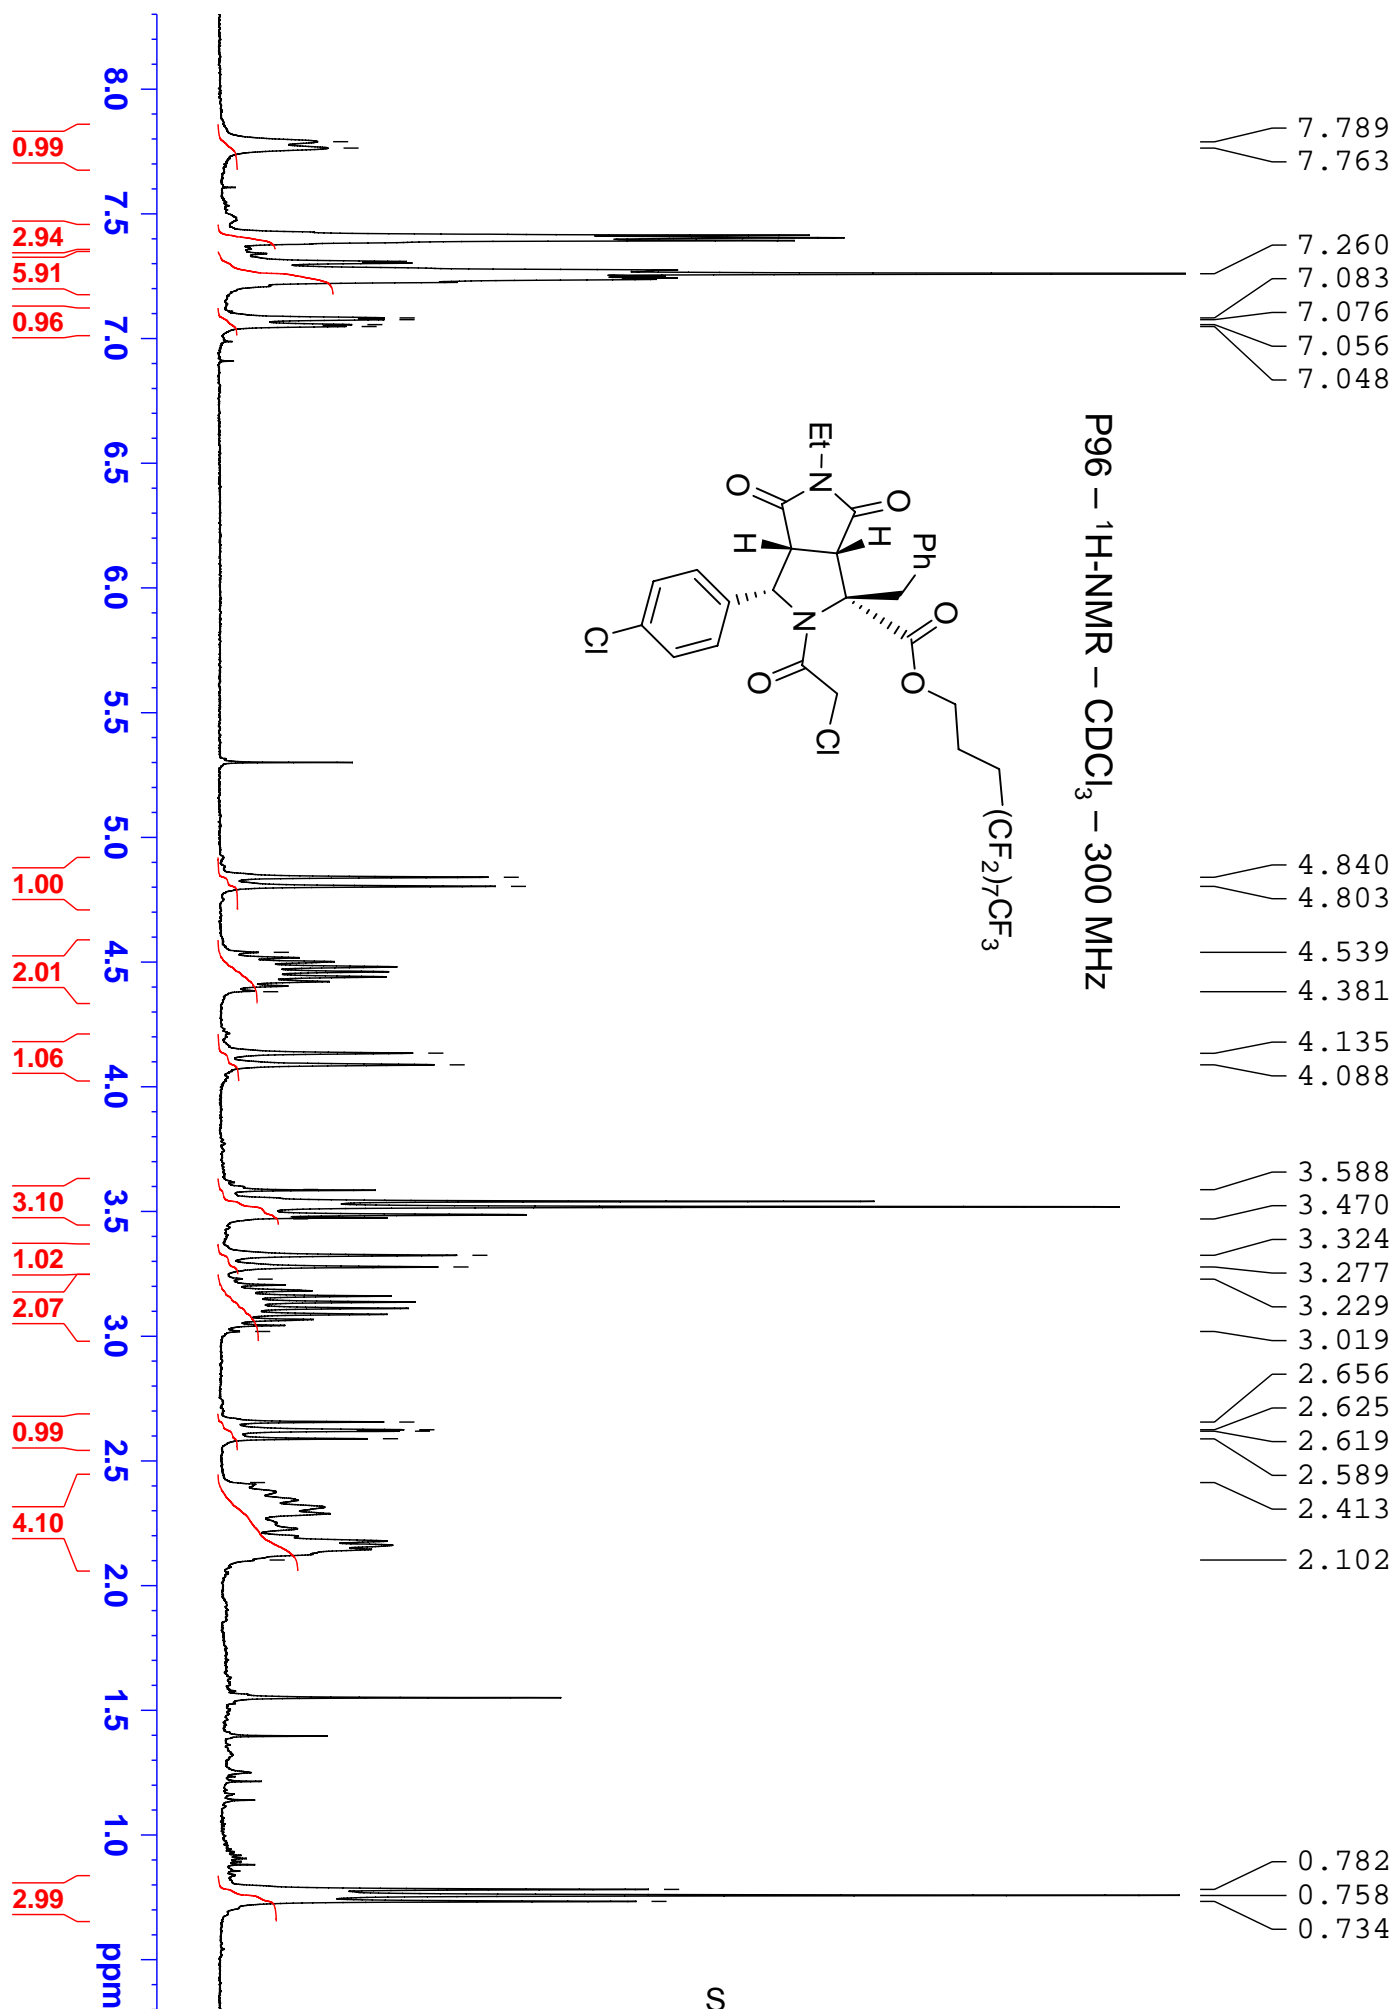

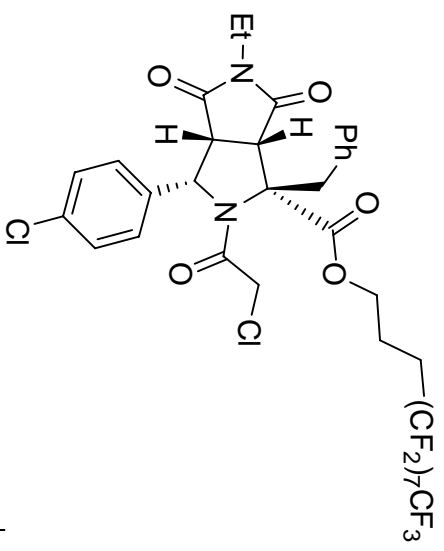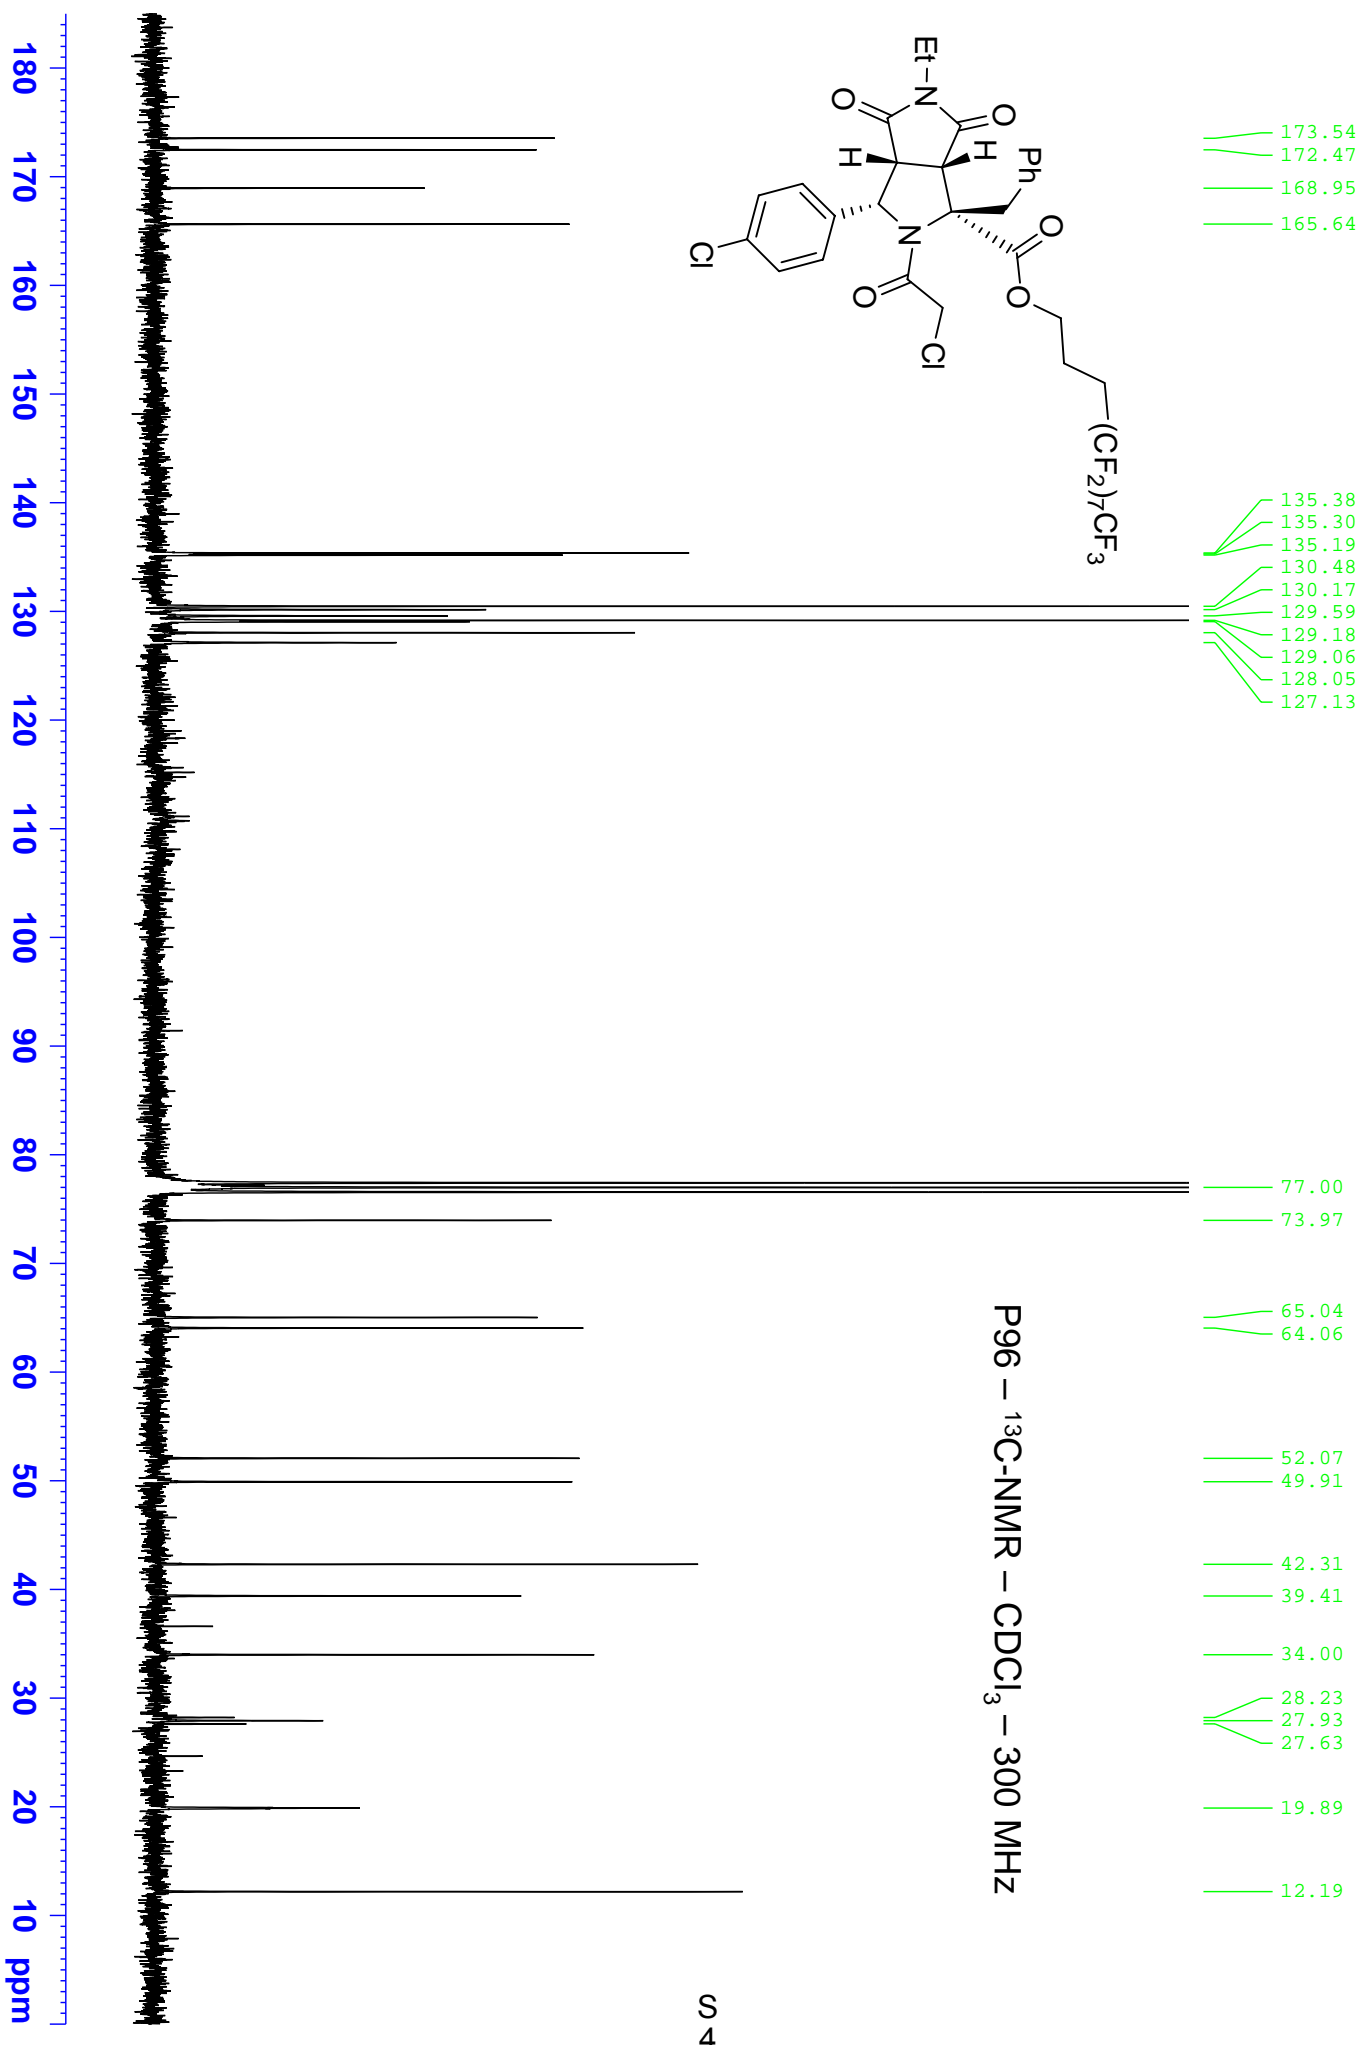

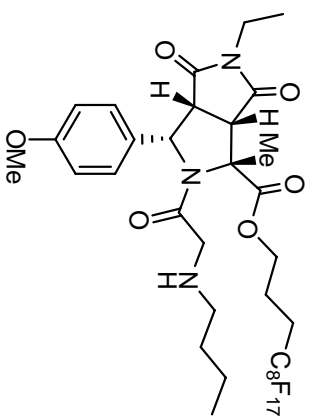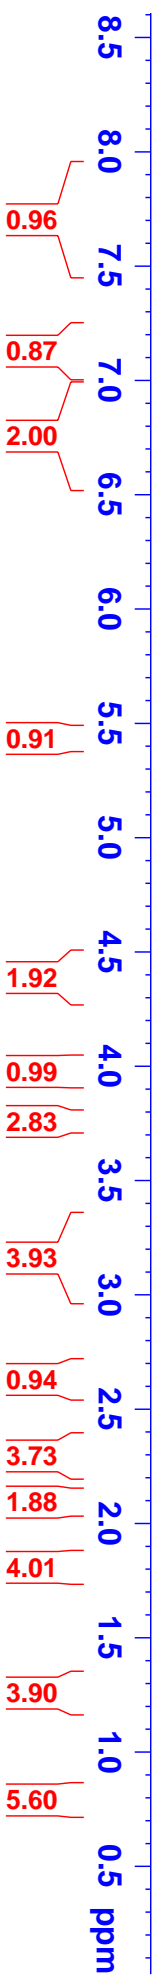

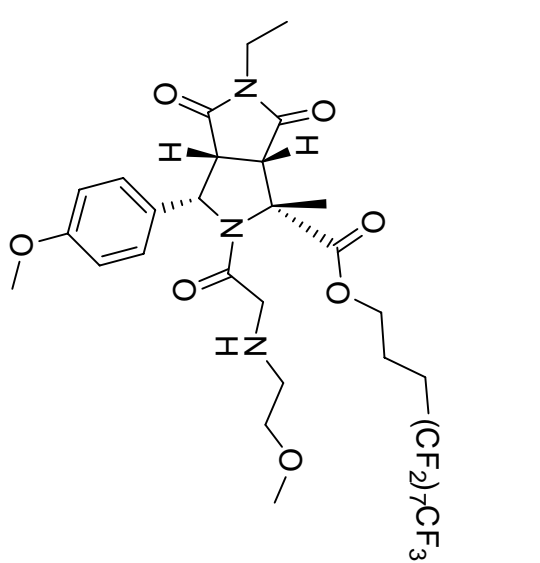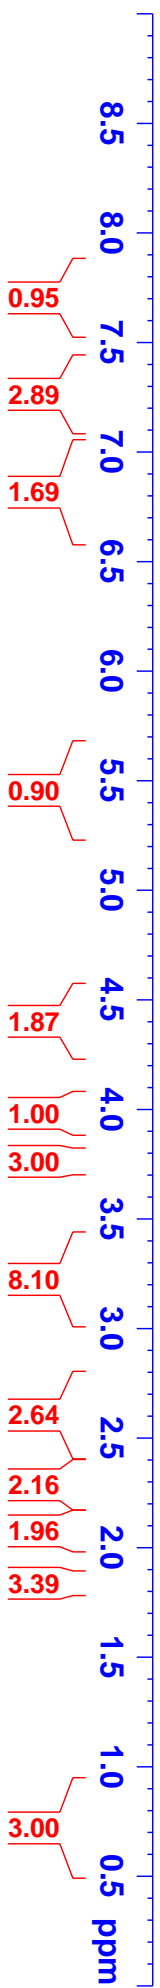

P86 conc. 1H NMR - CDCl3 301

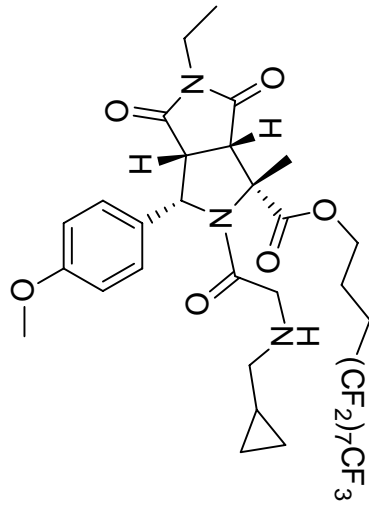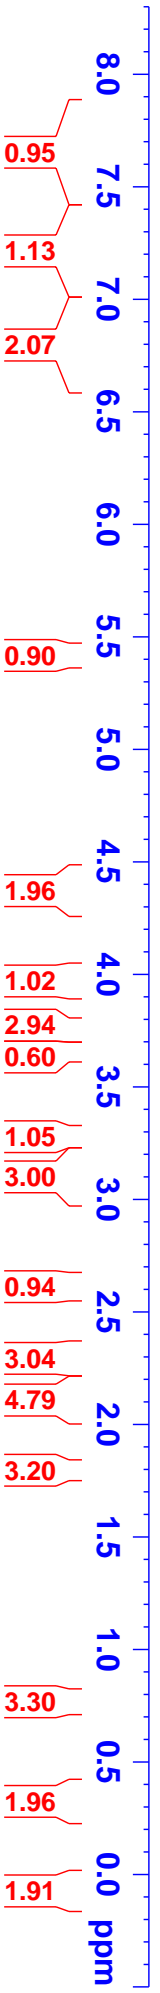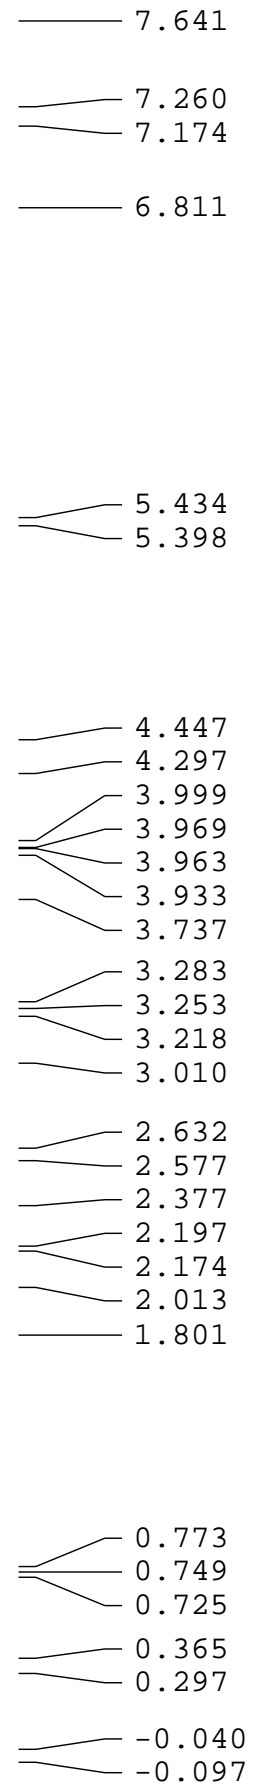

P86 - <sup>13</sup>C-NMR - CDCl<sub>3</sub> - 300 MHz

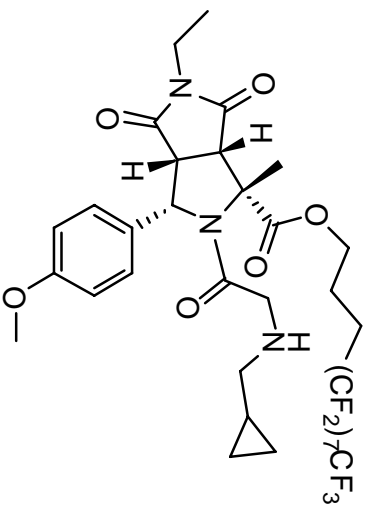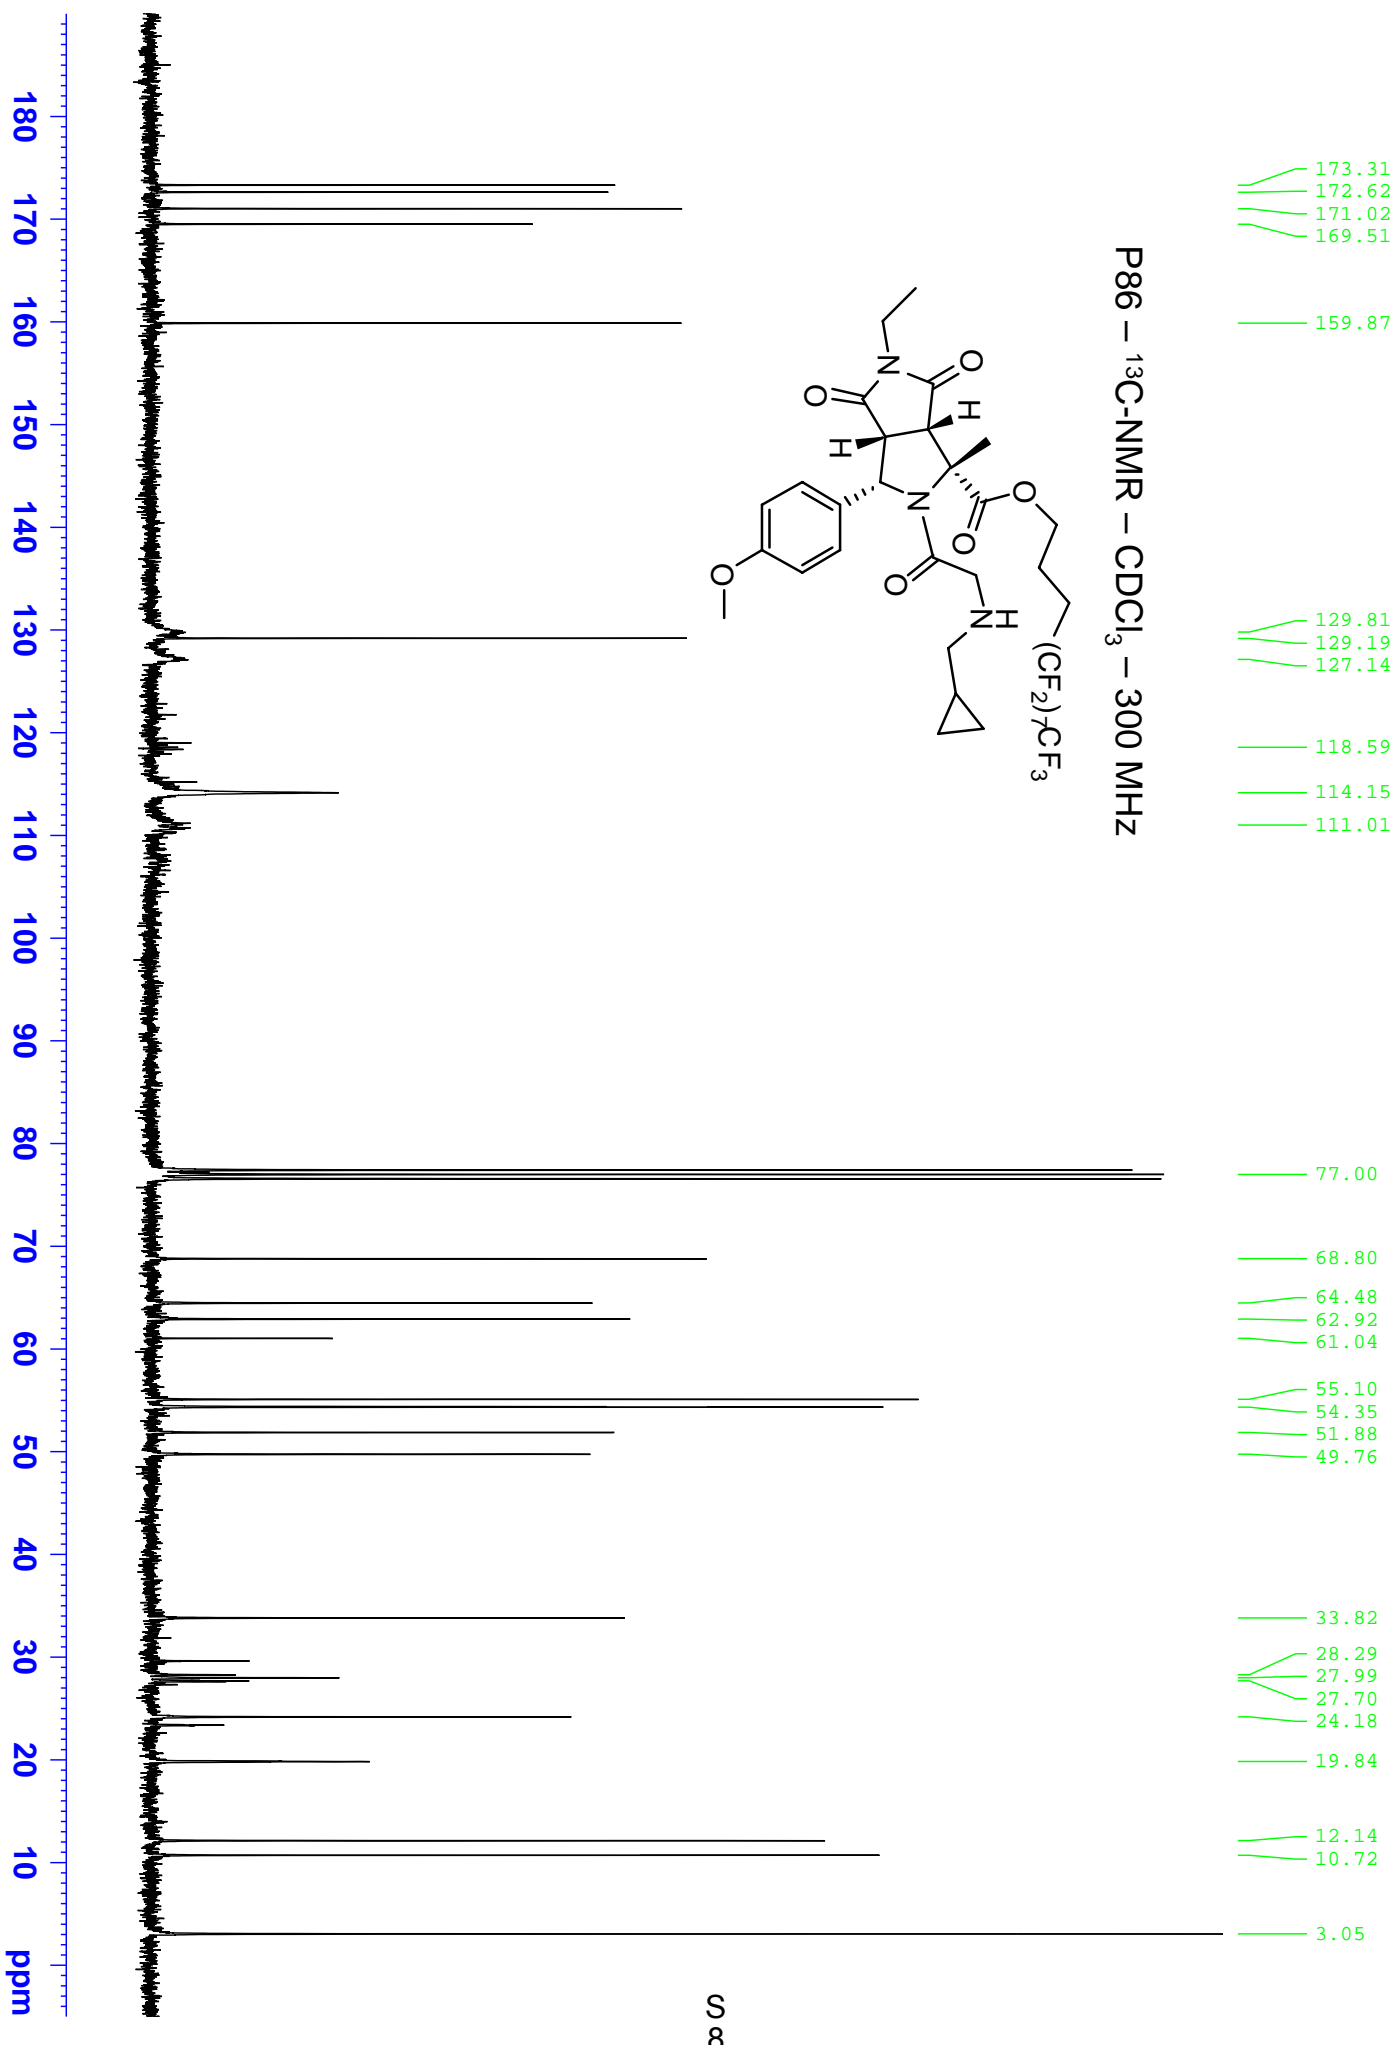



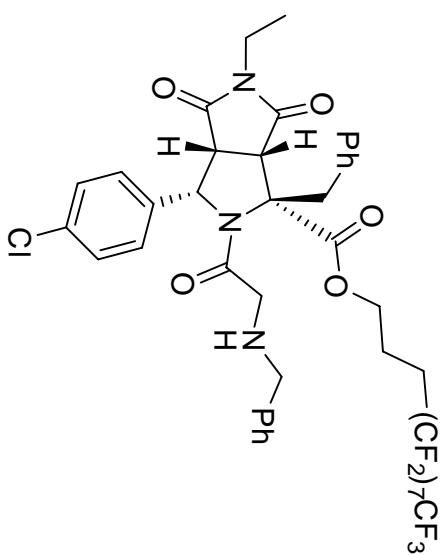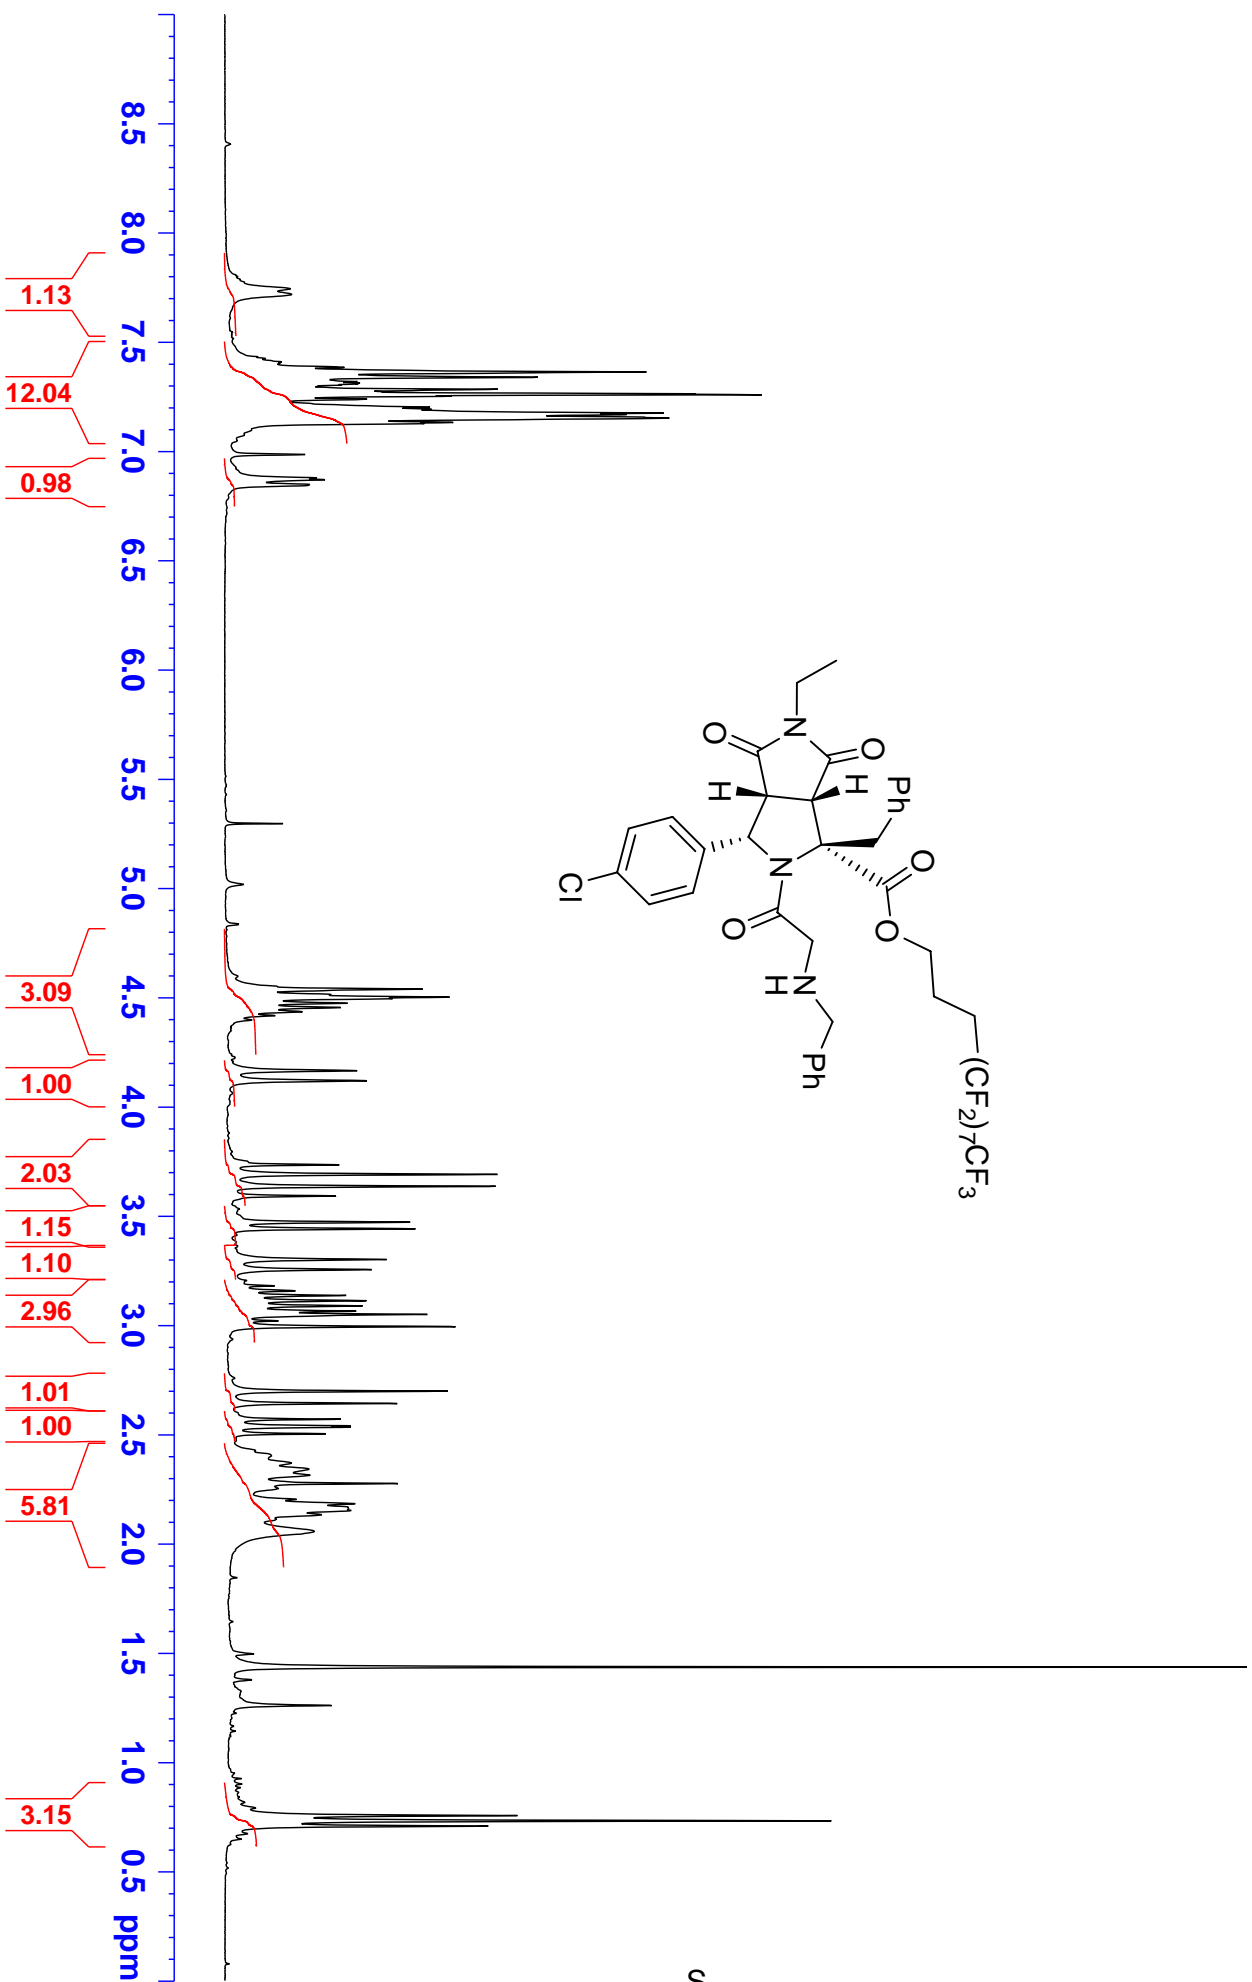

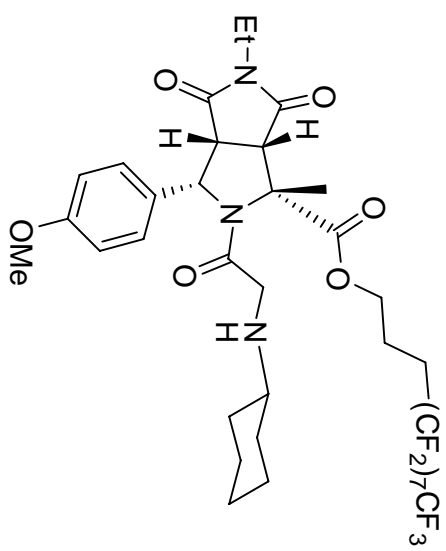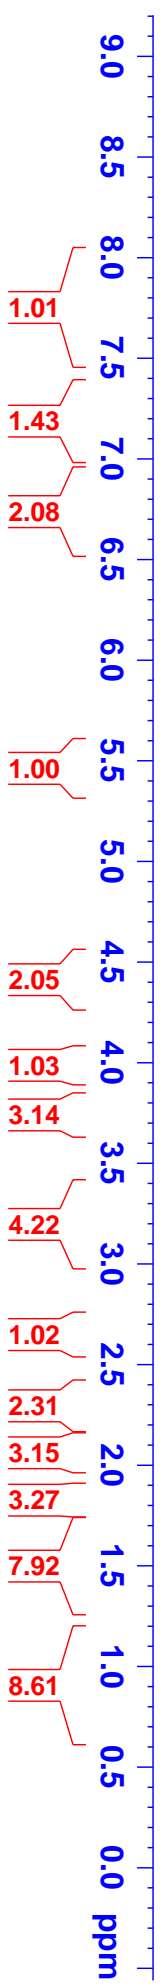

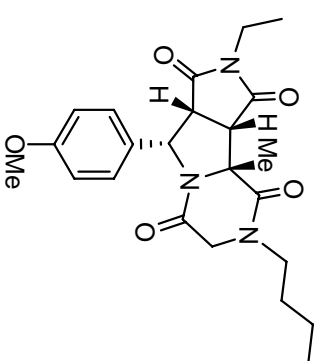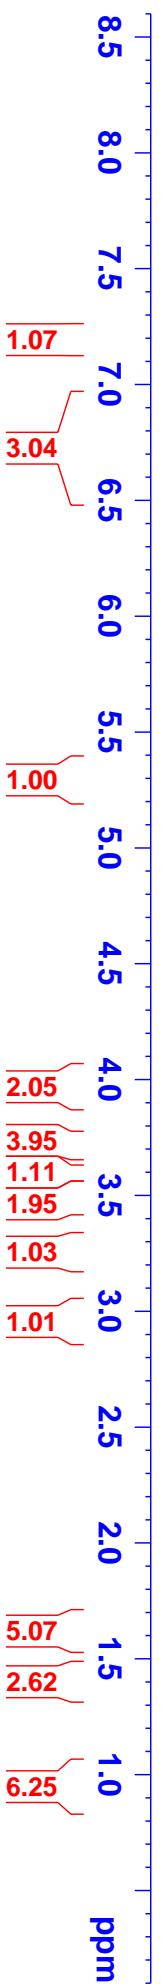

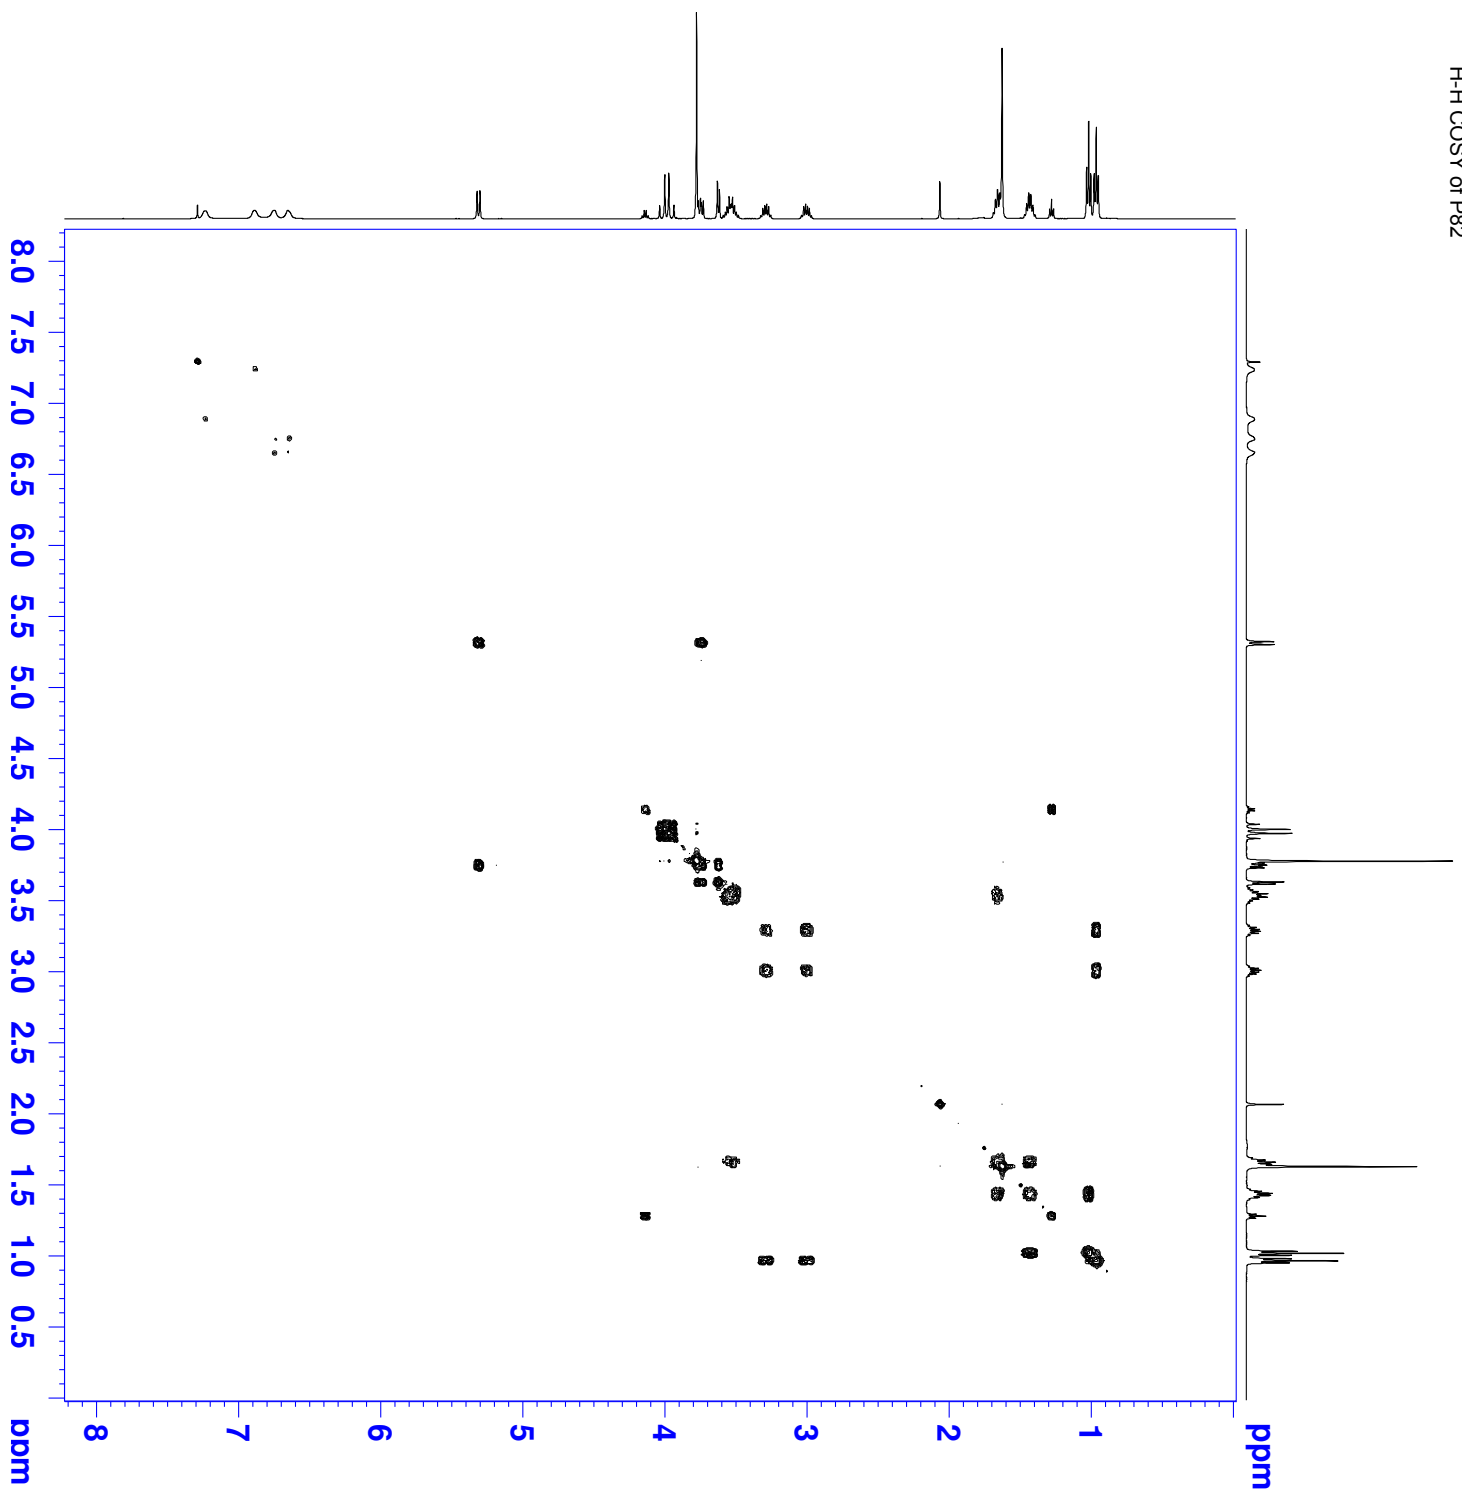

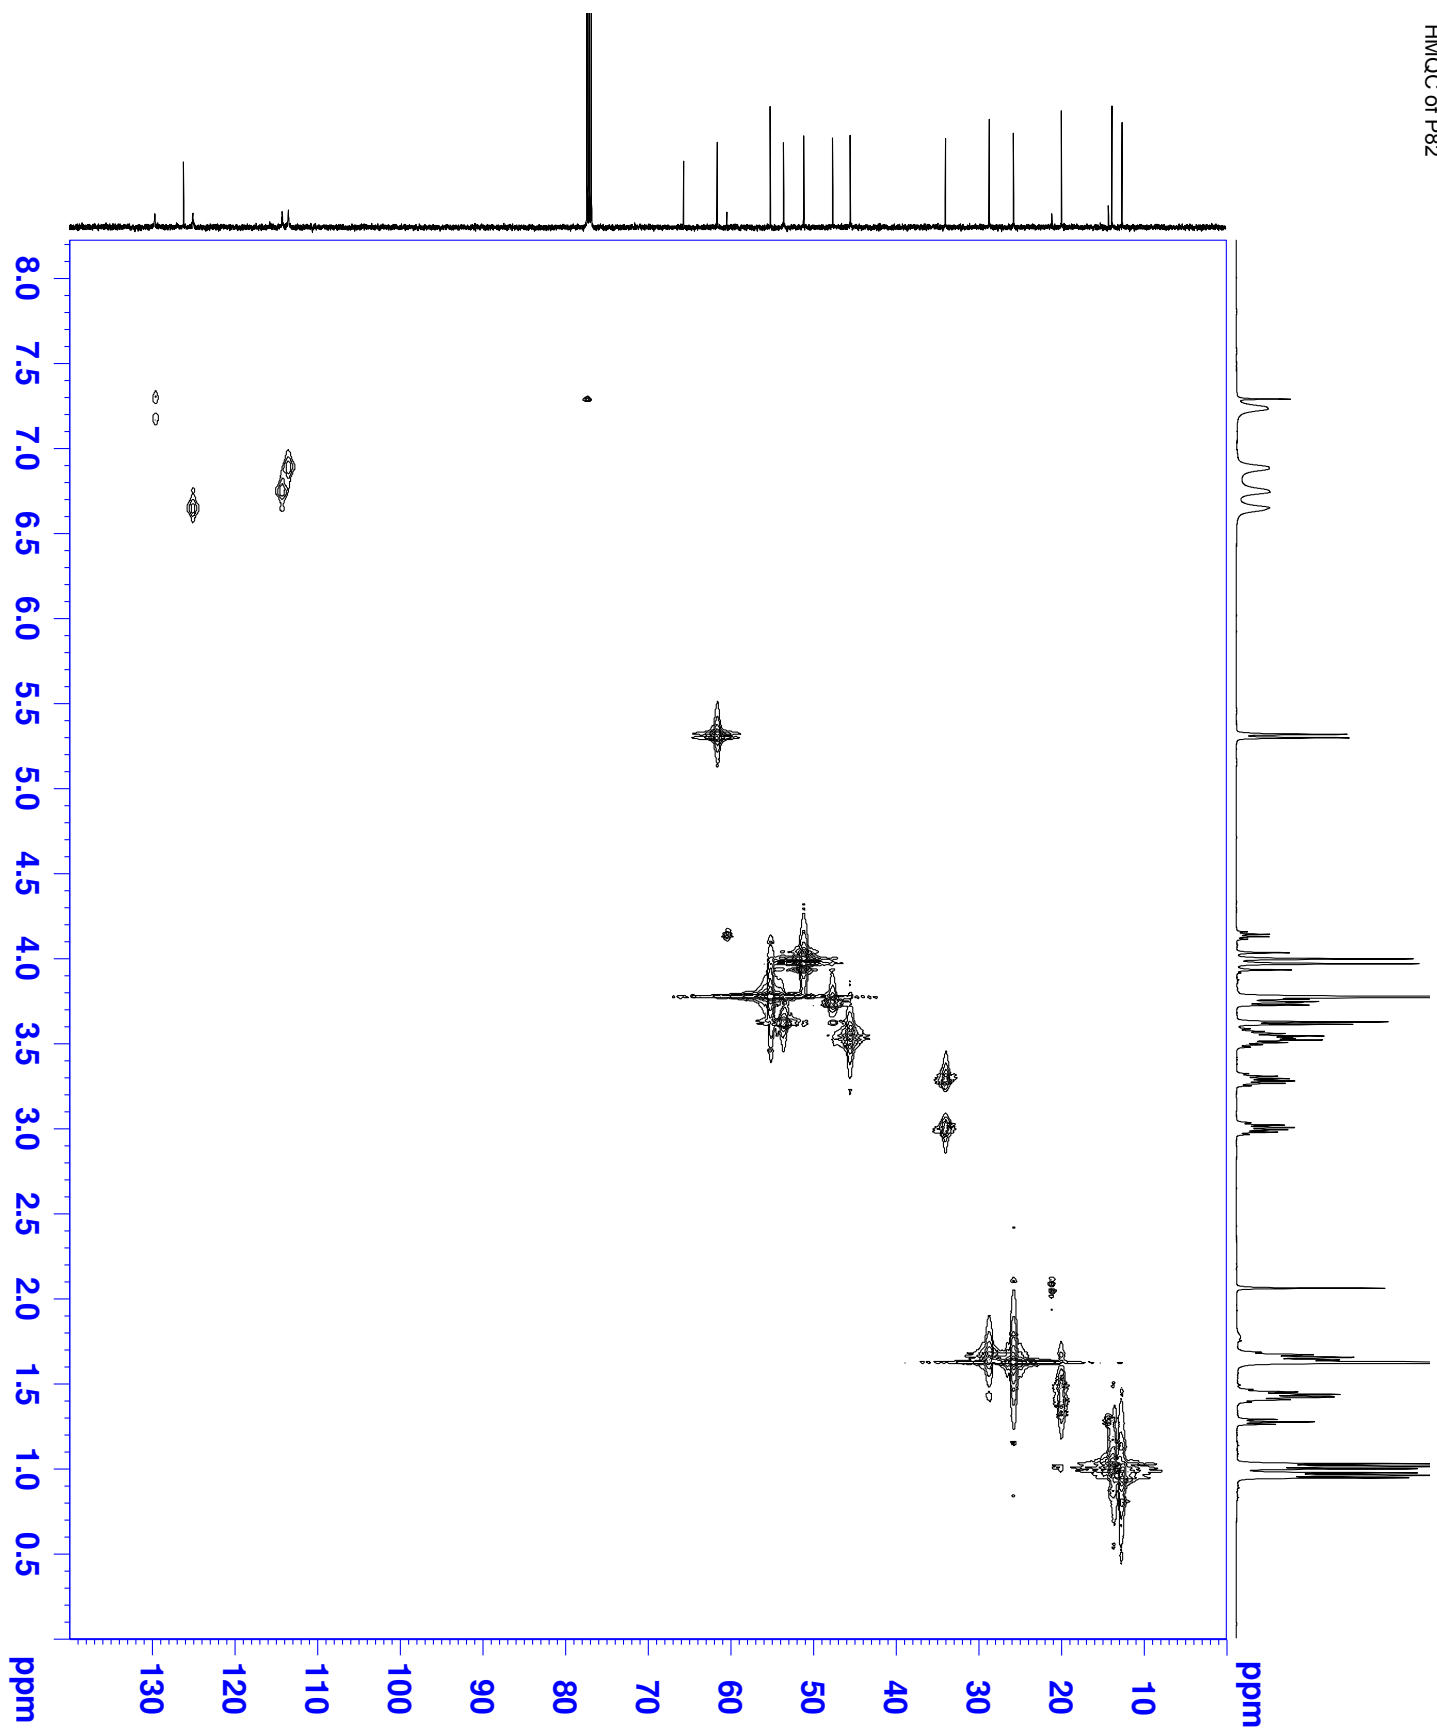

P92 - <sup>1</sup>H NMR - CDCl<sub>3</sub> - 300 MHz

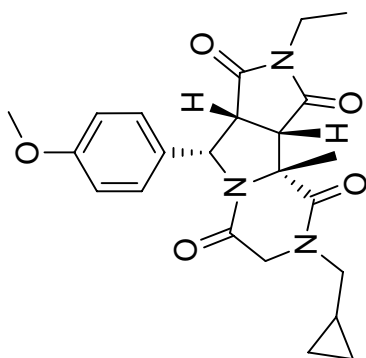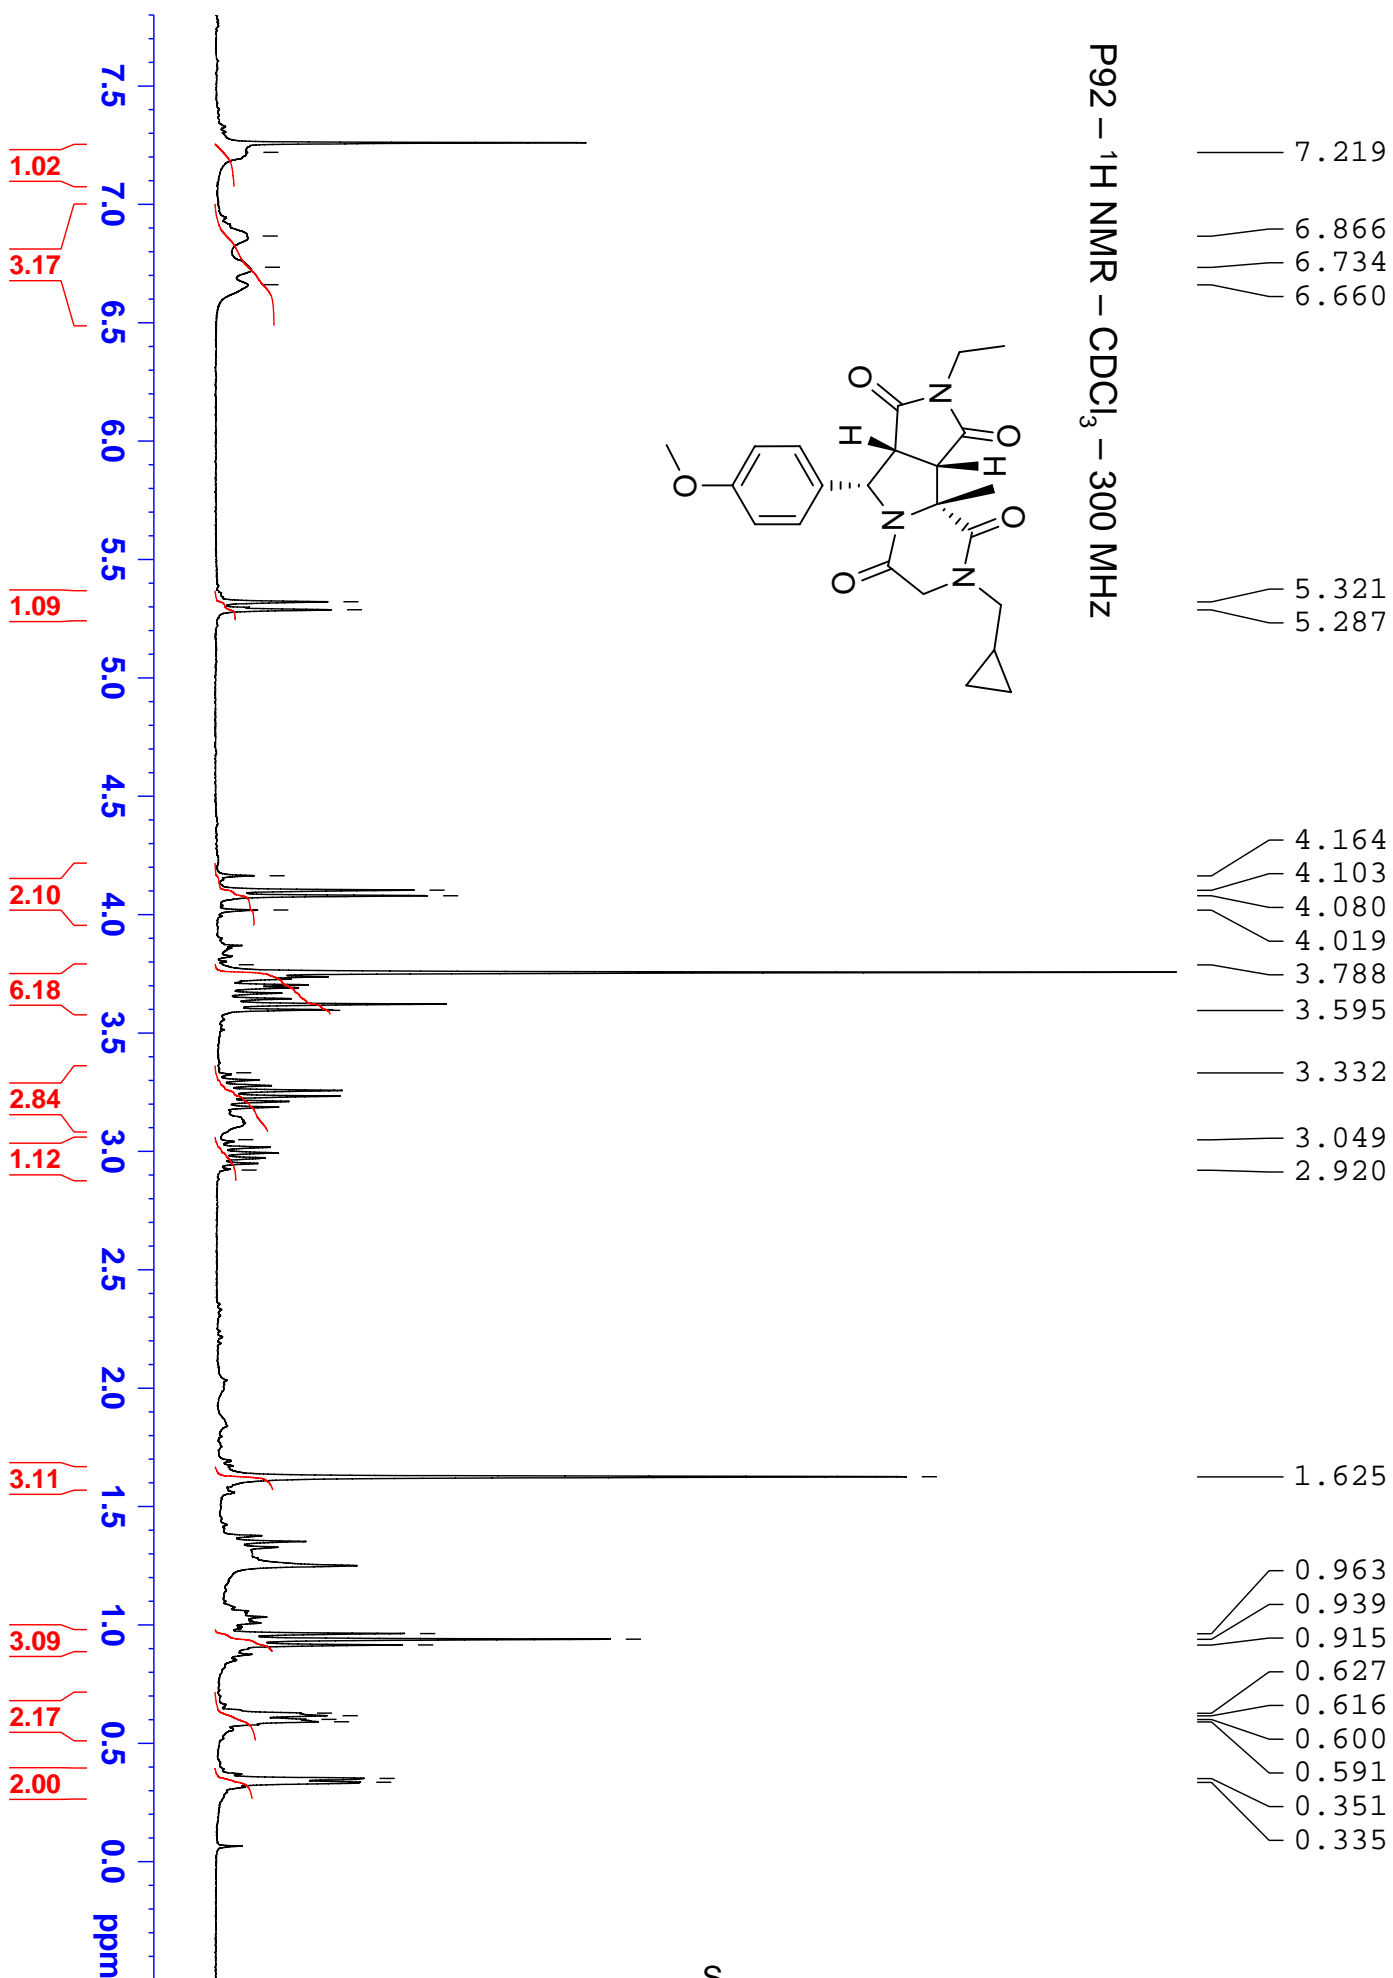

P92 - <sup>13</sup>C NMR - CDCl<sub>3</sub> - 301A

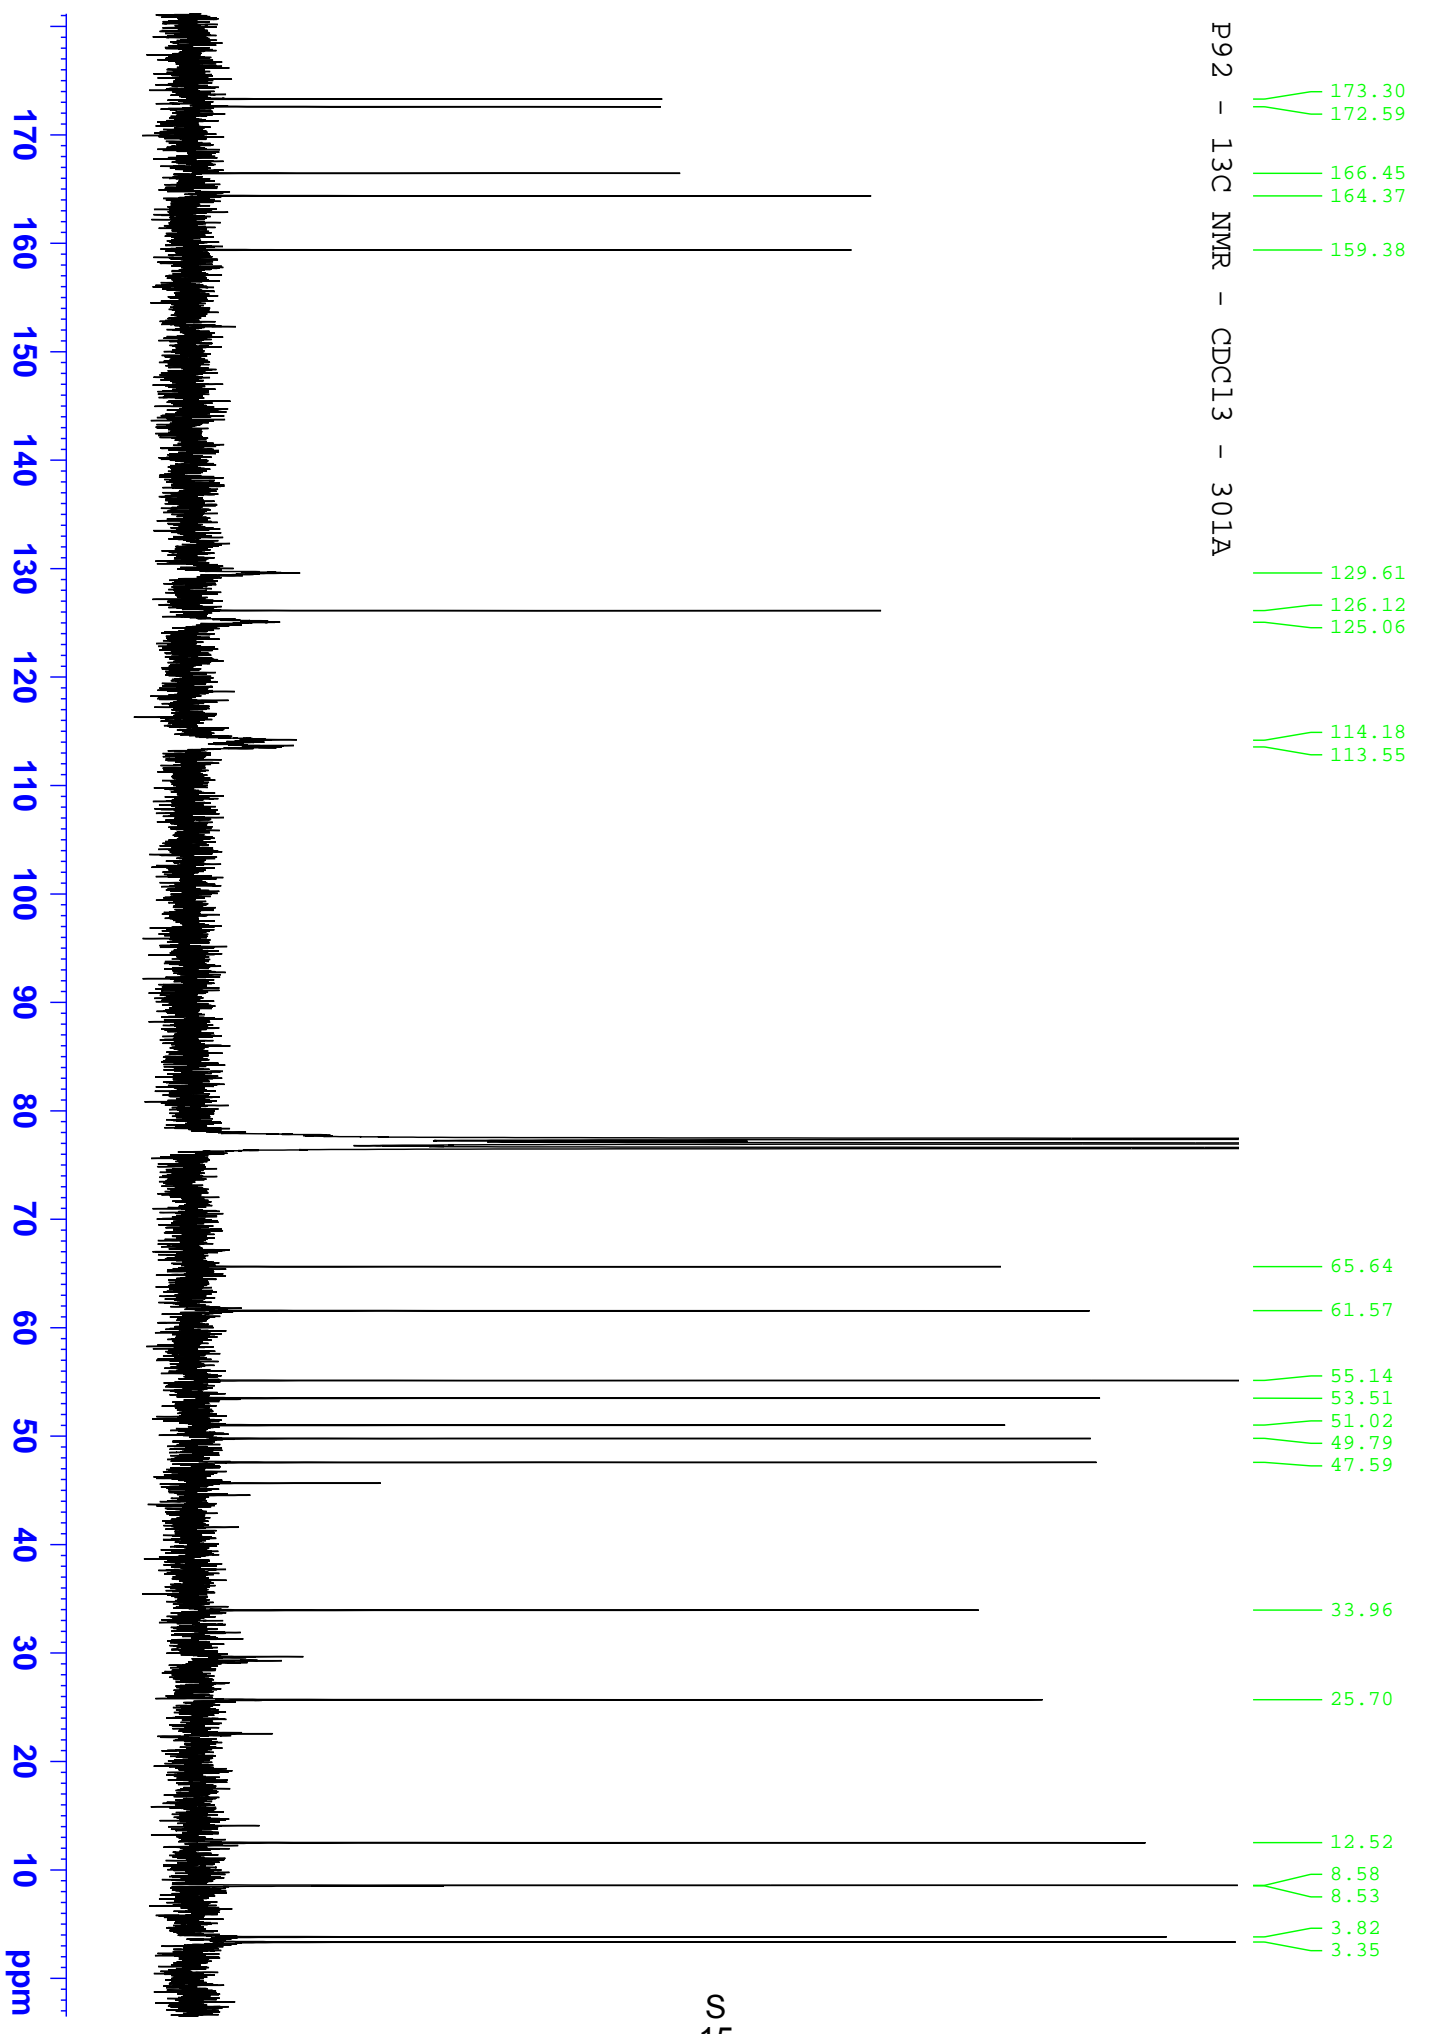

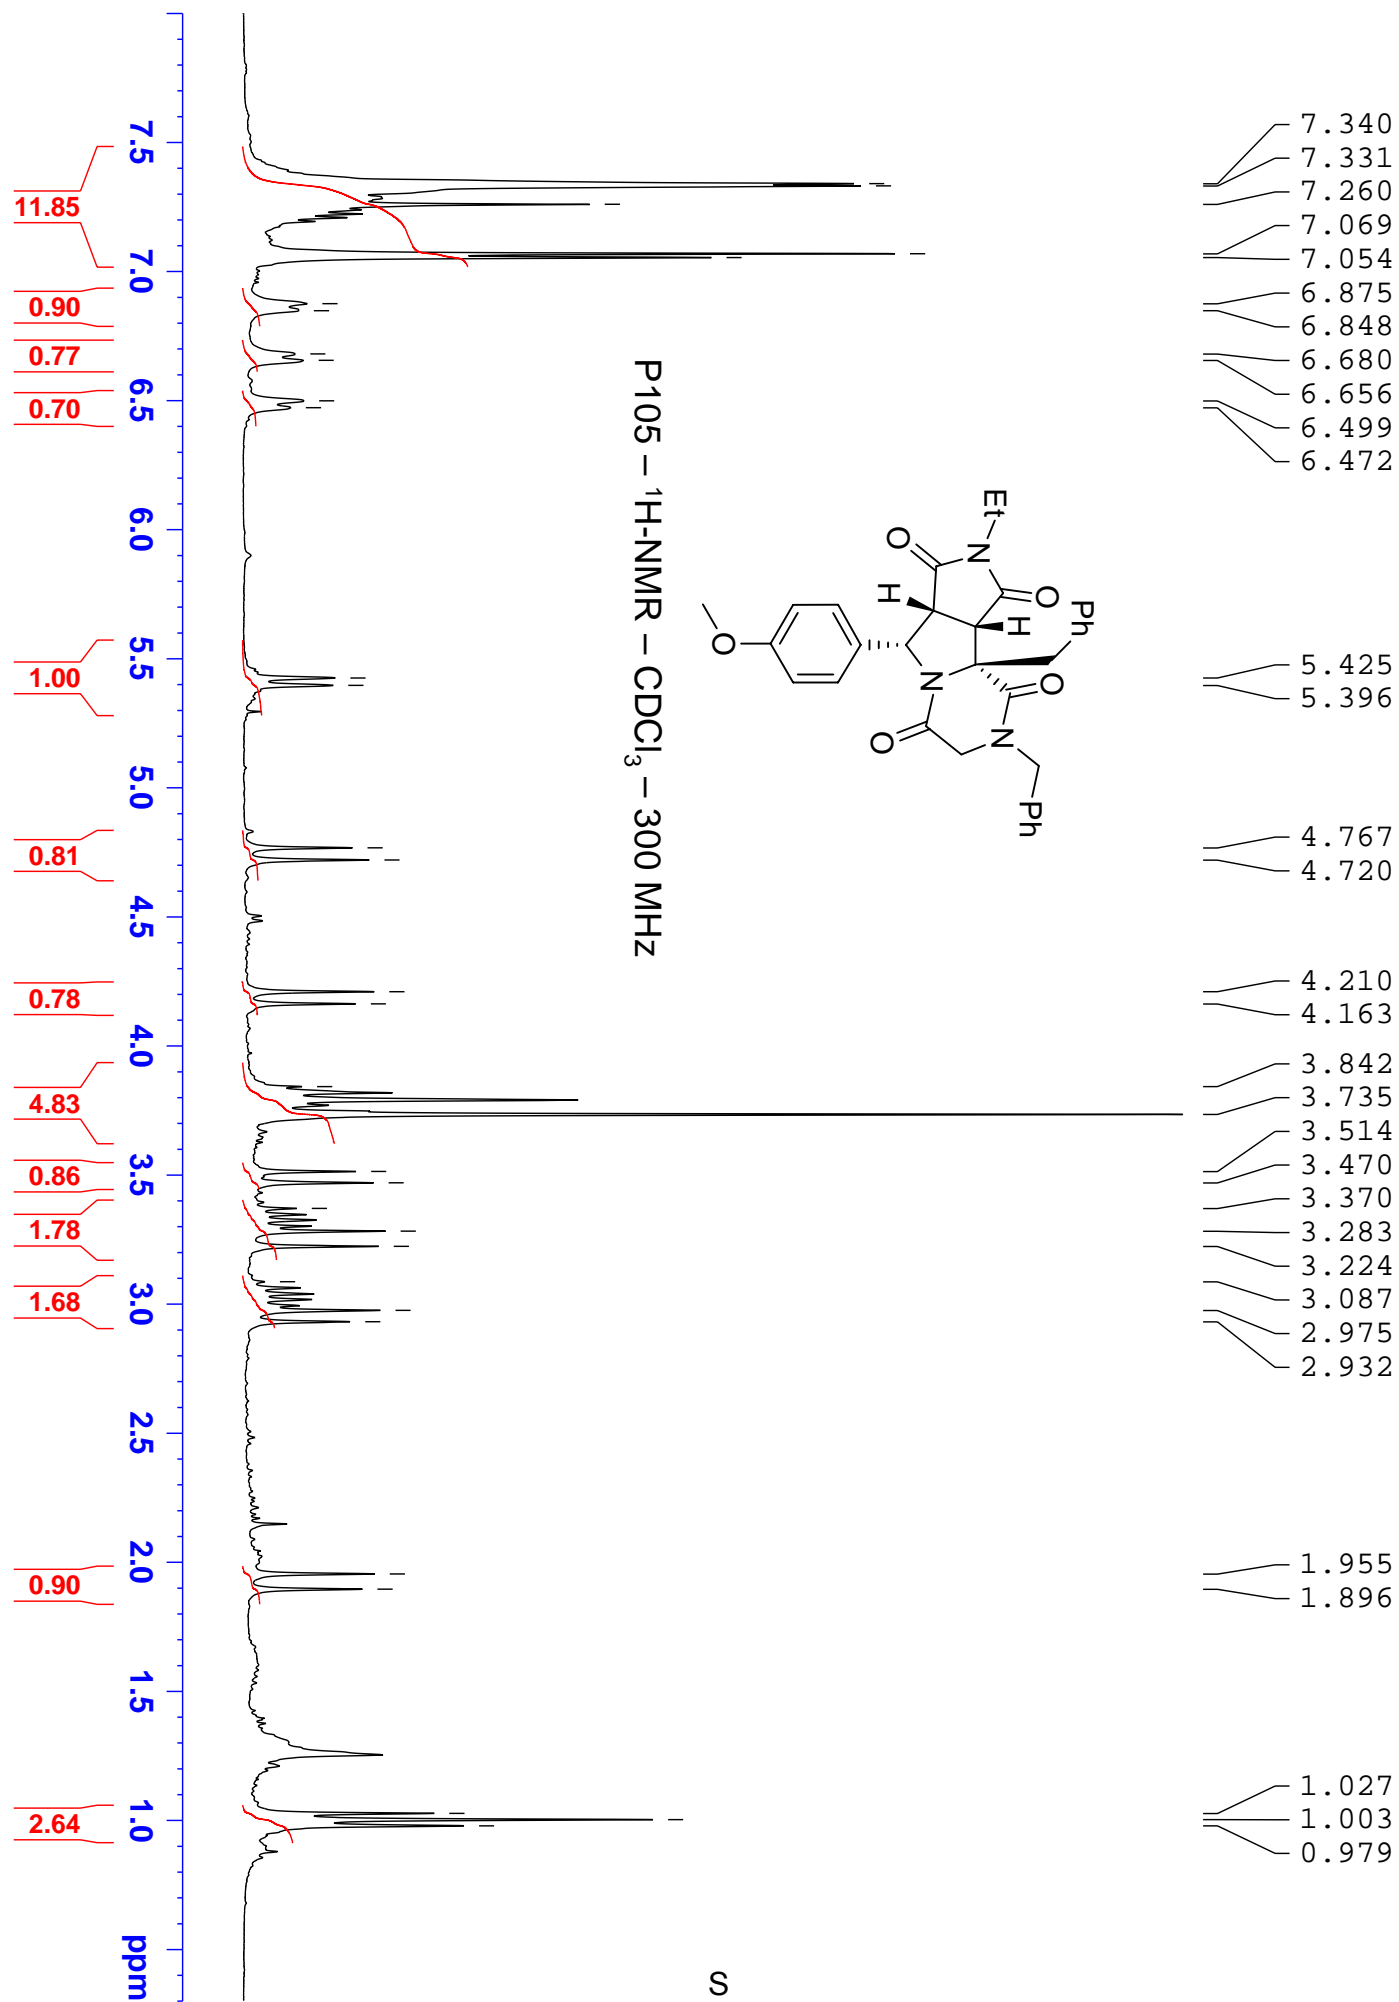



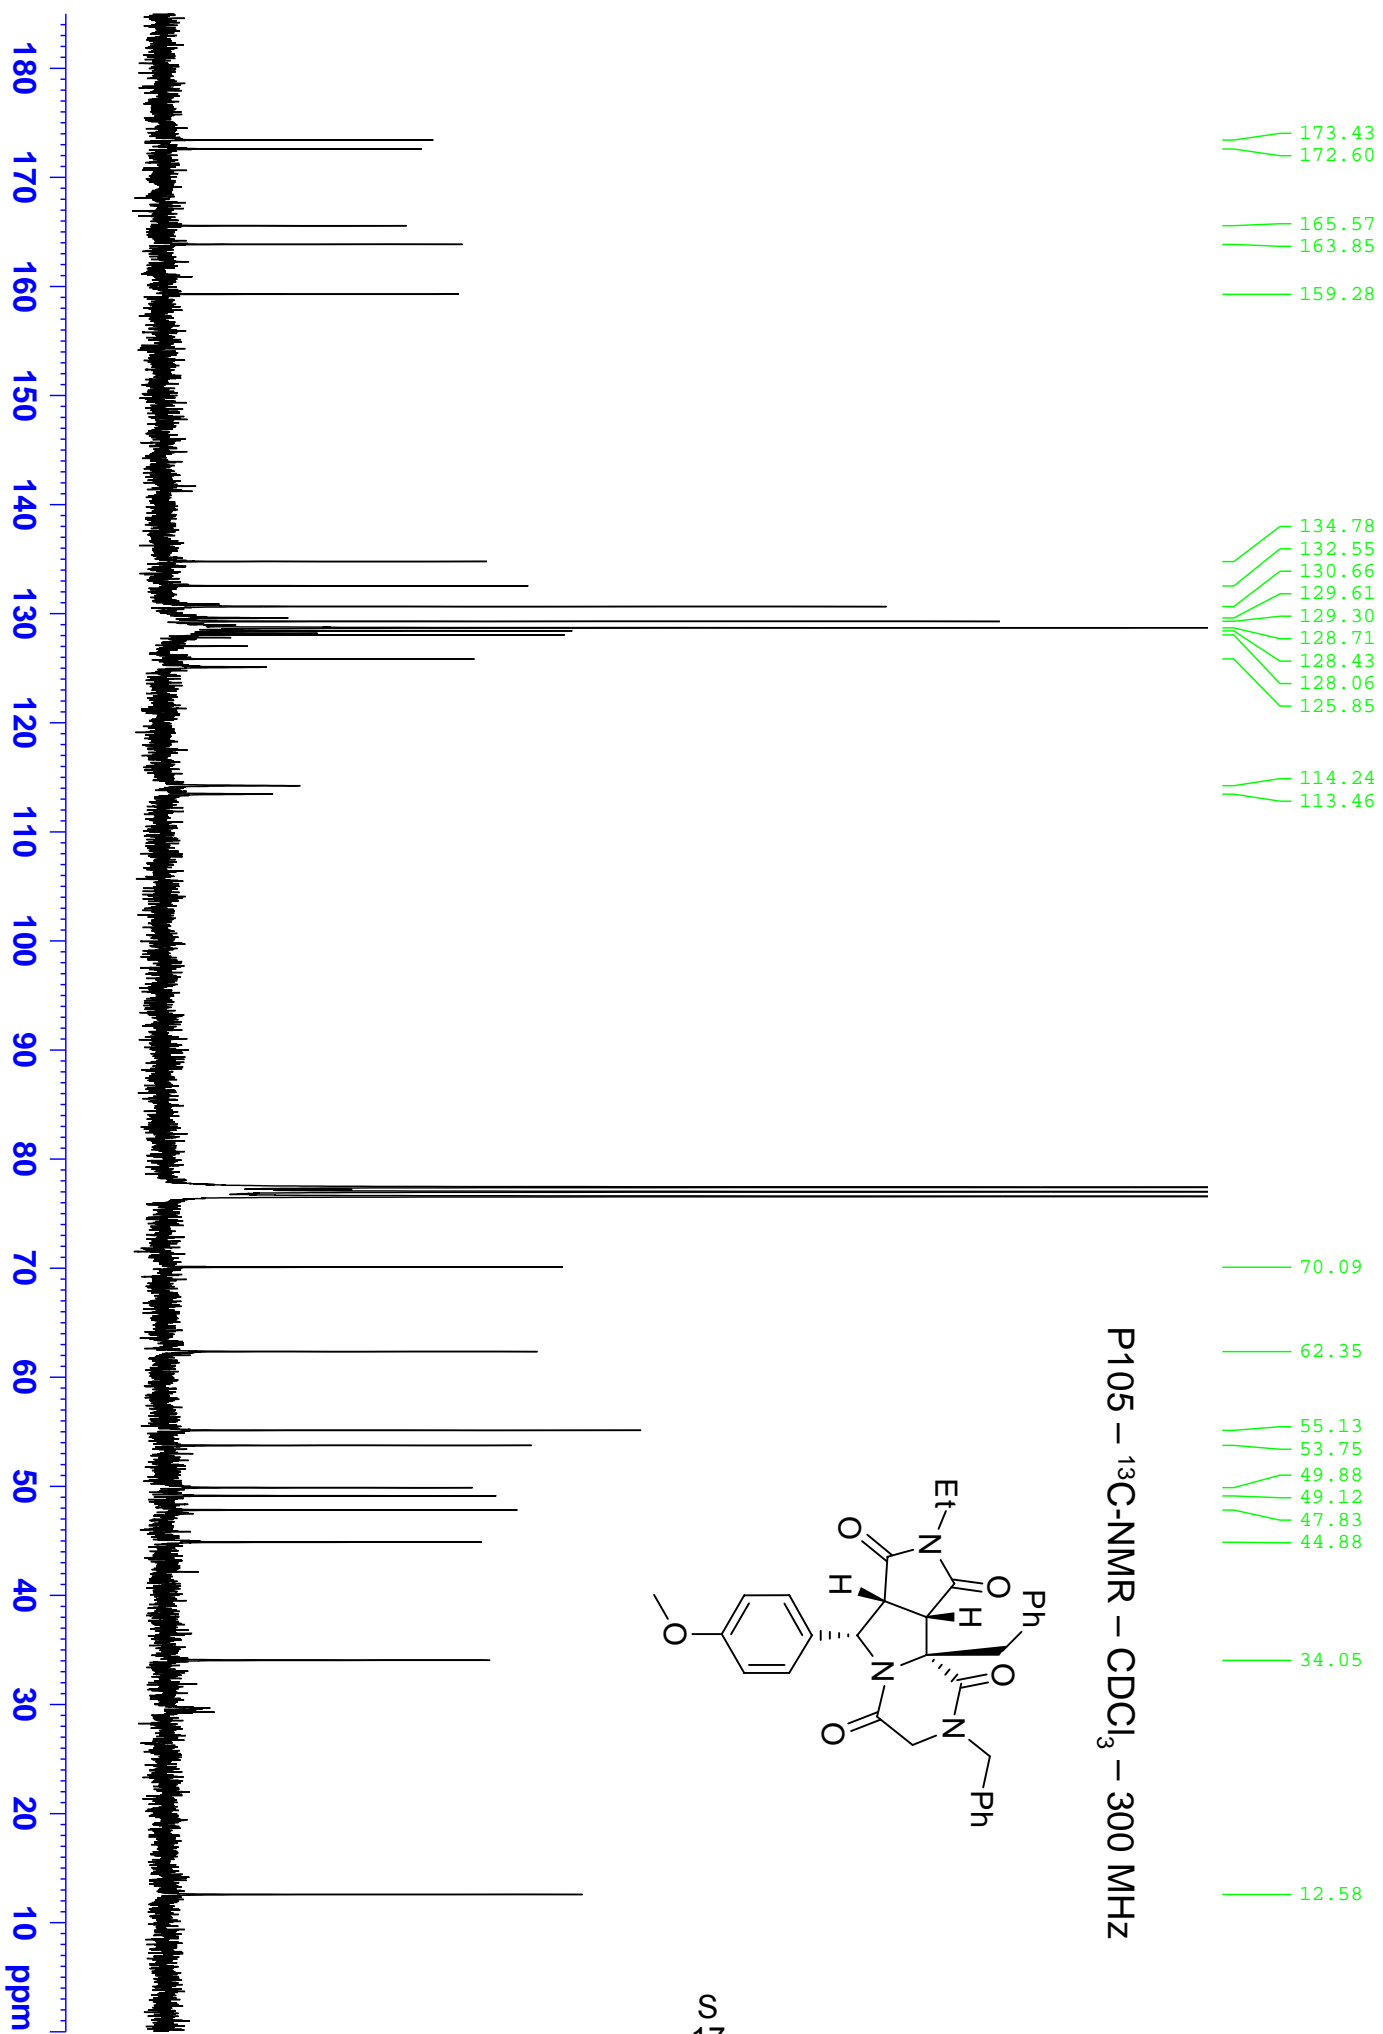

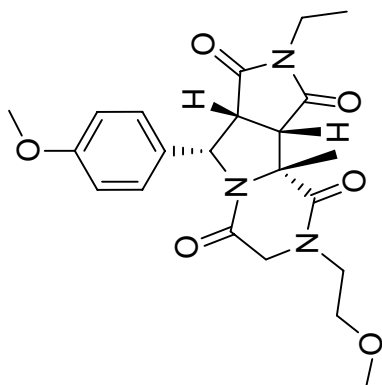

P89 – <sup>1</sup>H-NMR – CDCl<sub>3</sub> – 300 MHz

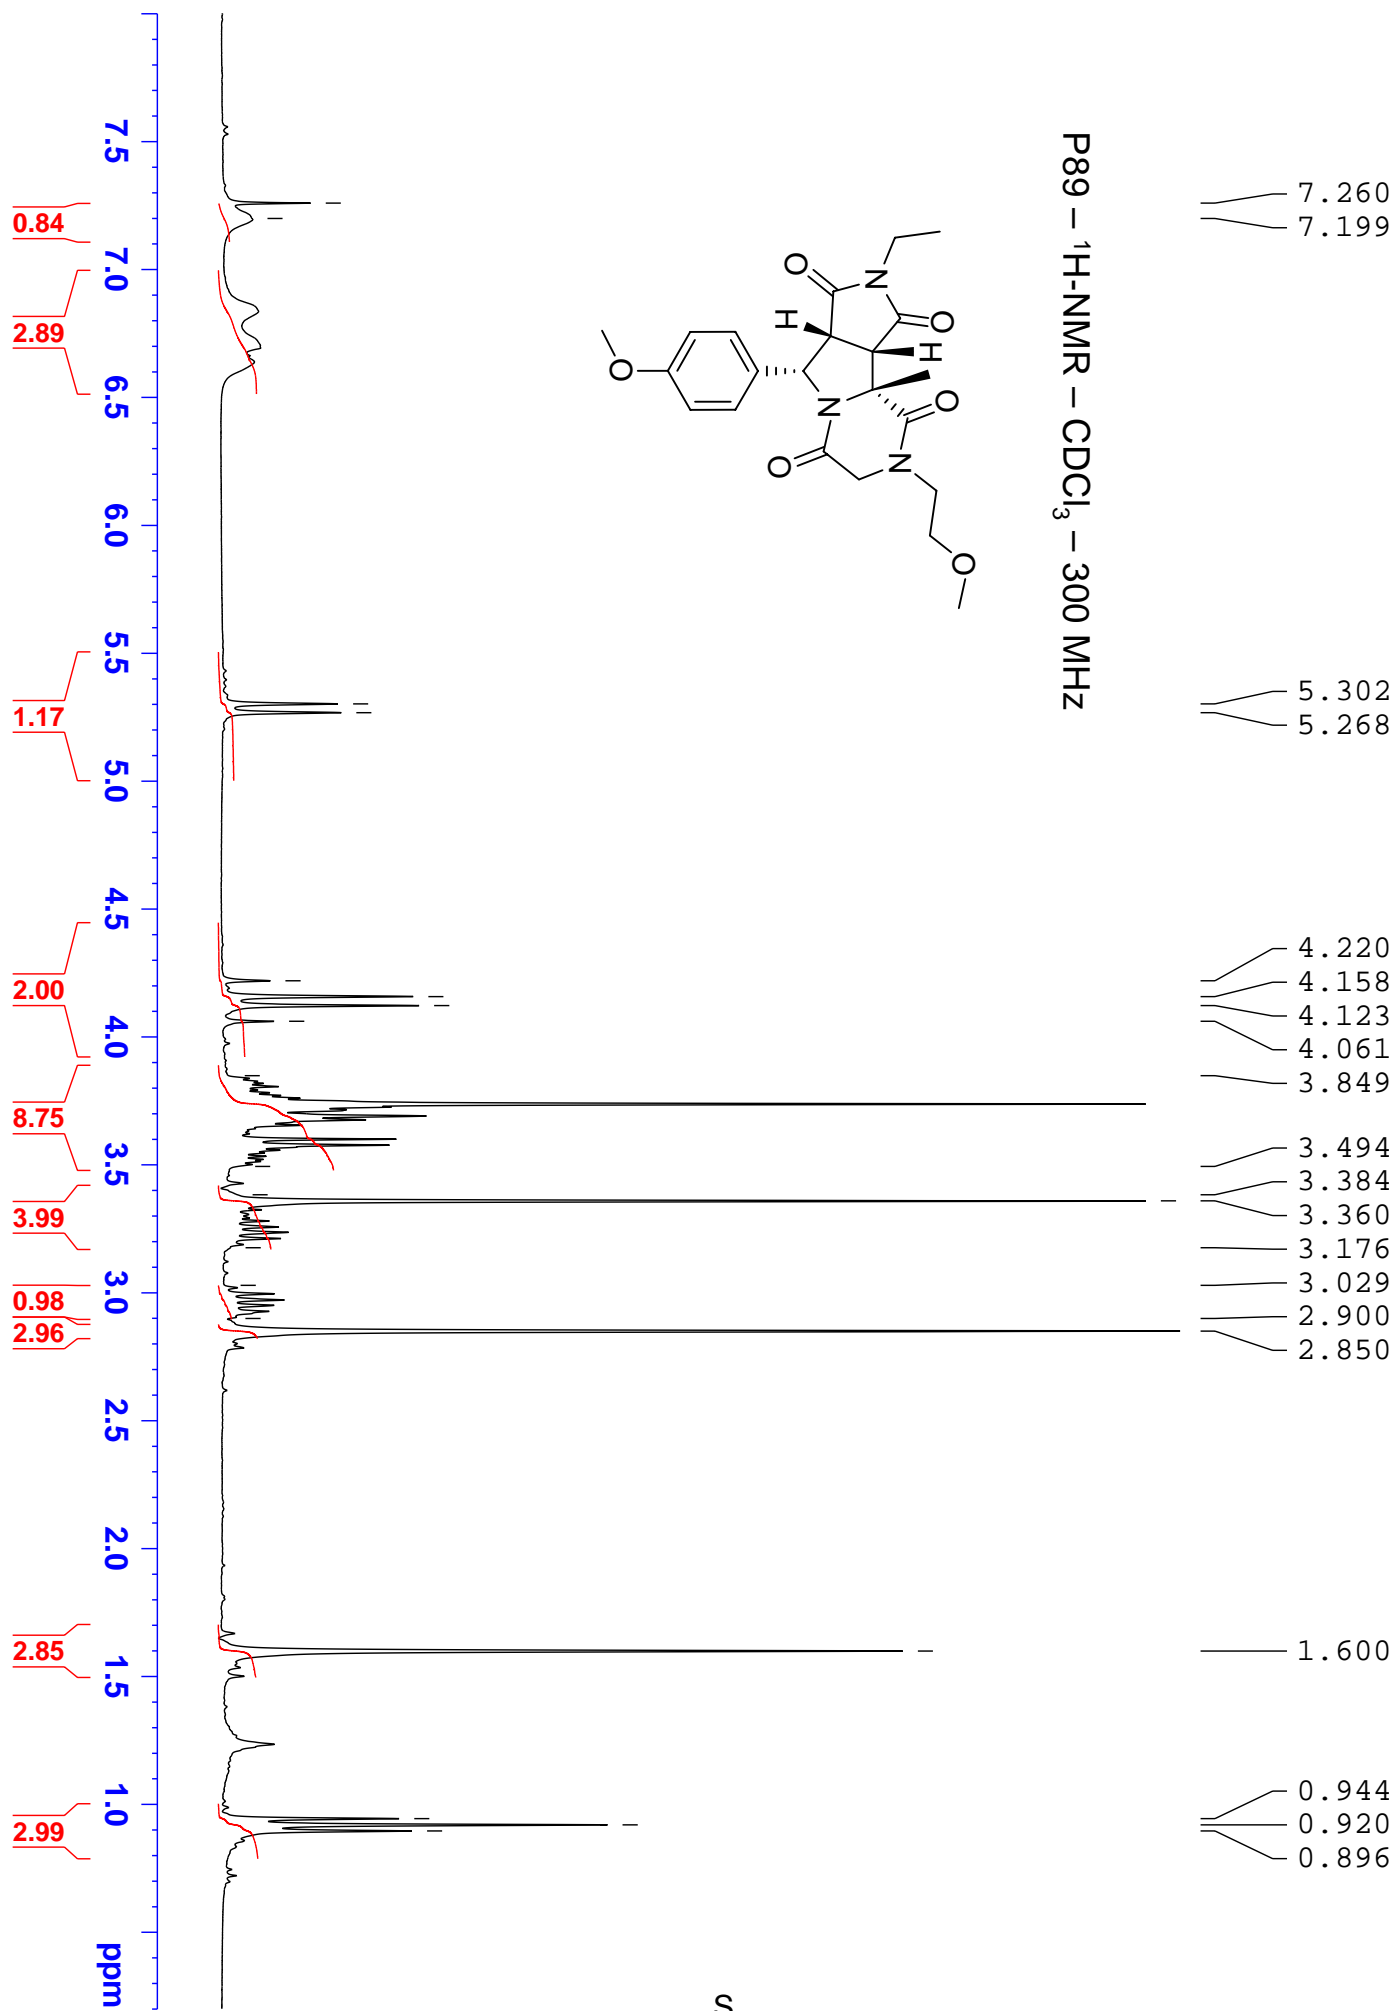

ppm (t1)

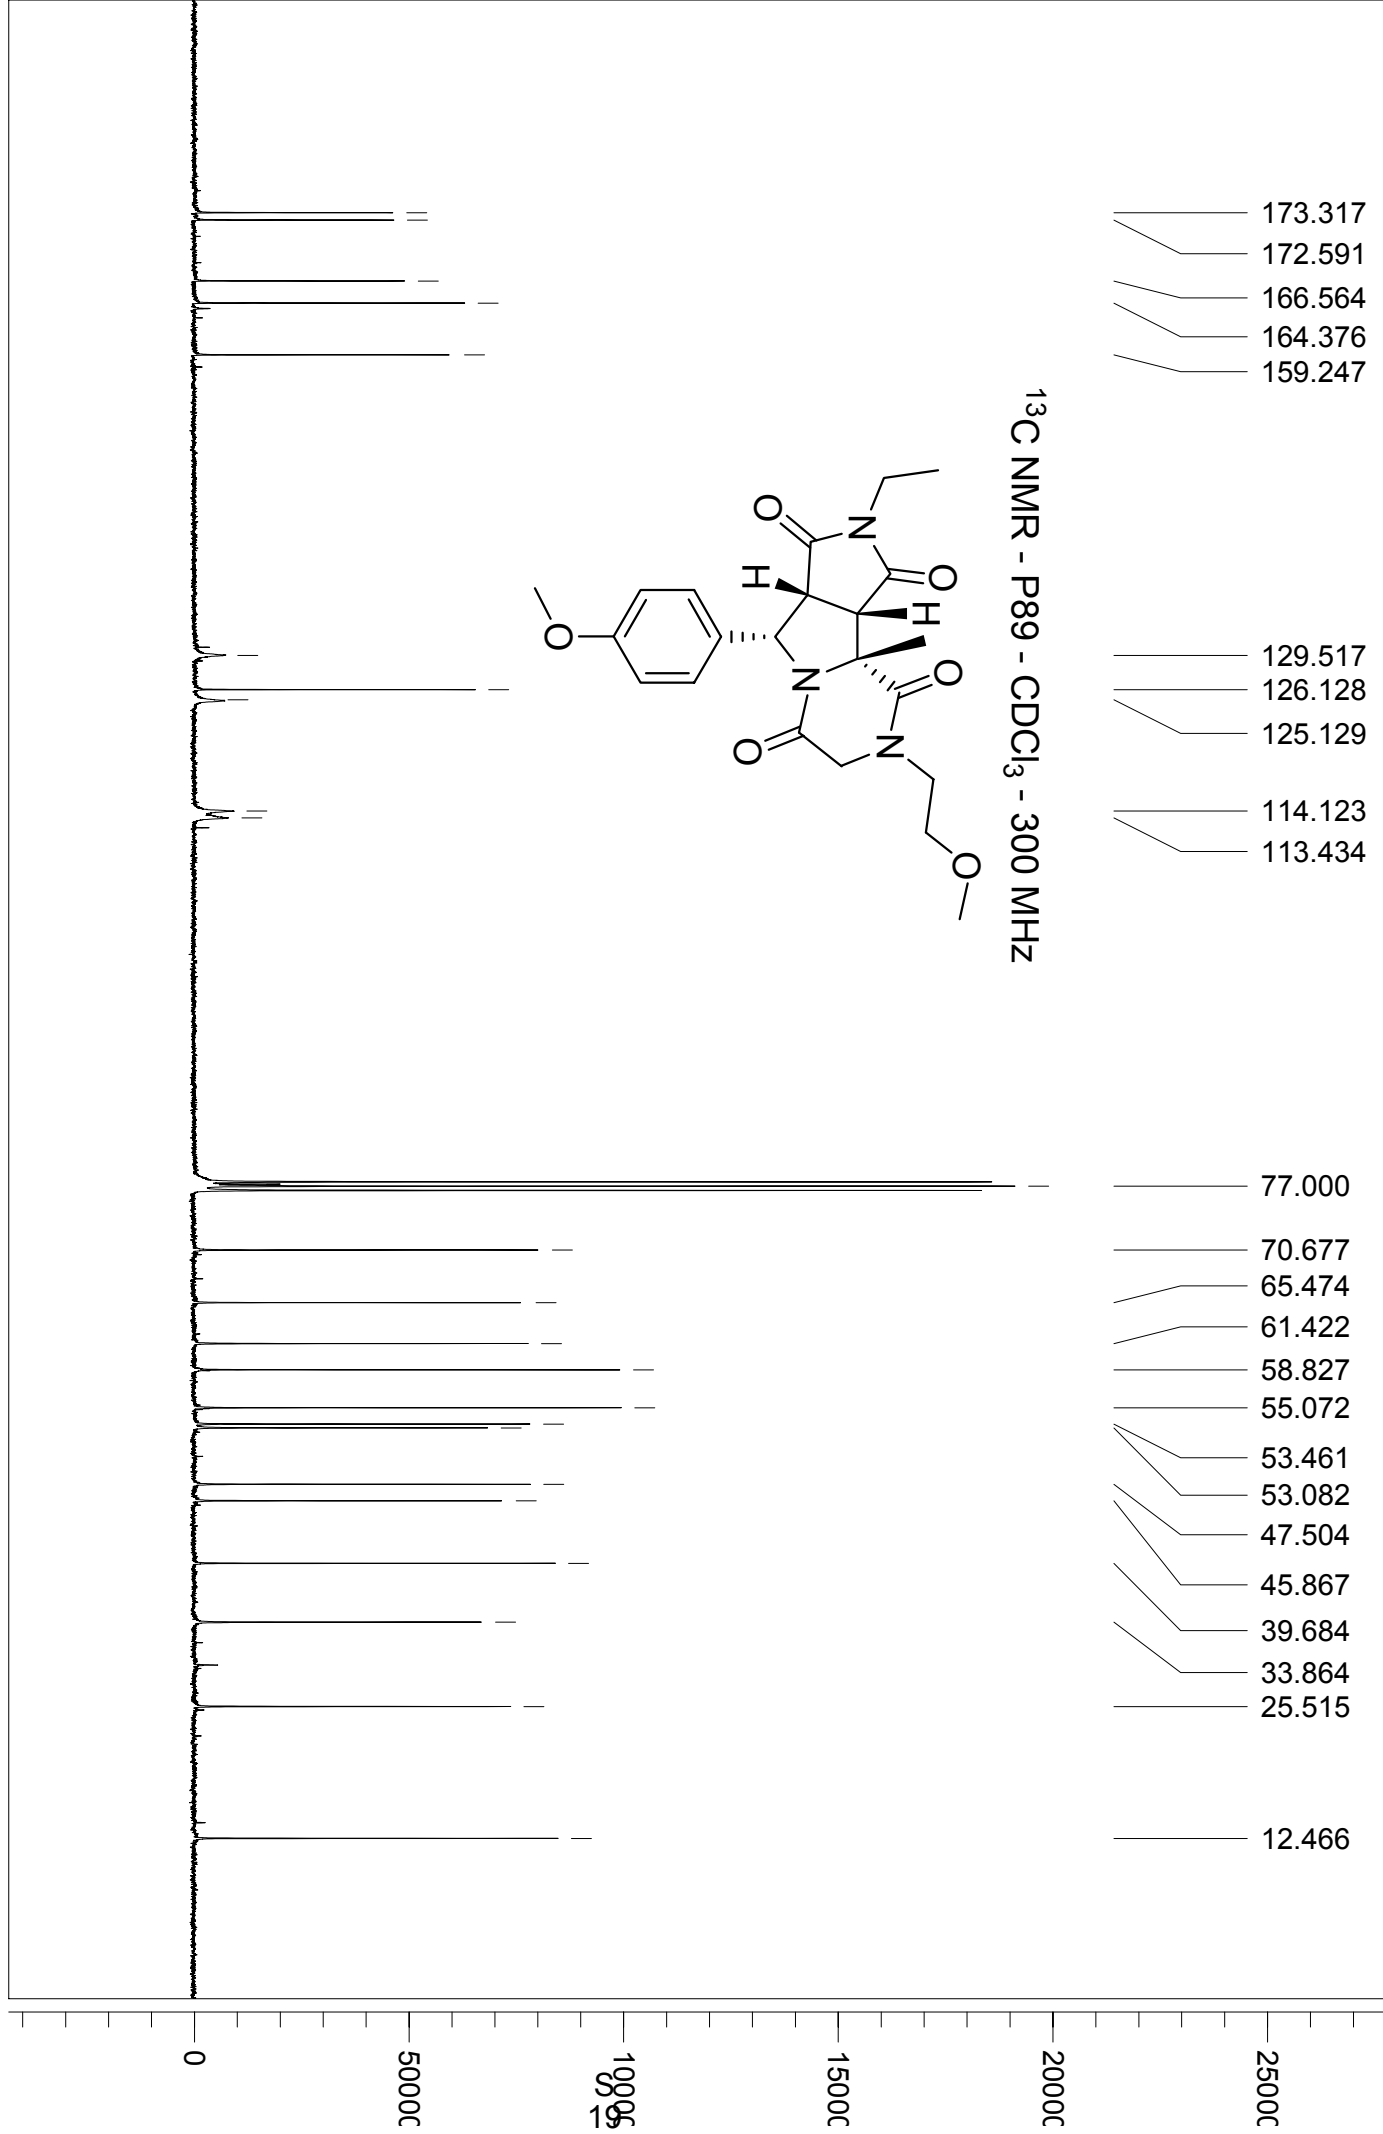

P103 – <sup>1</sup>H-NMR – CDCl<sub>3</sub> – 300 MHz

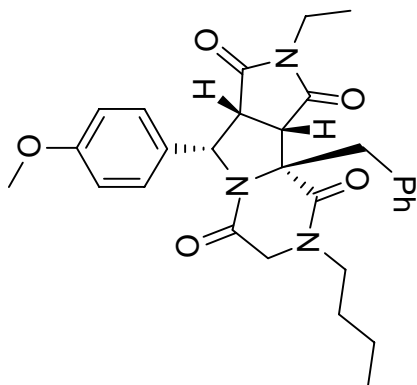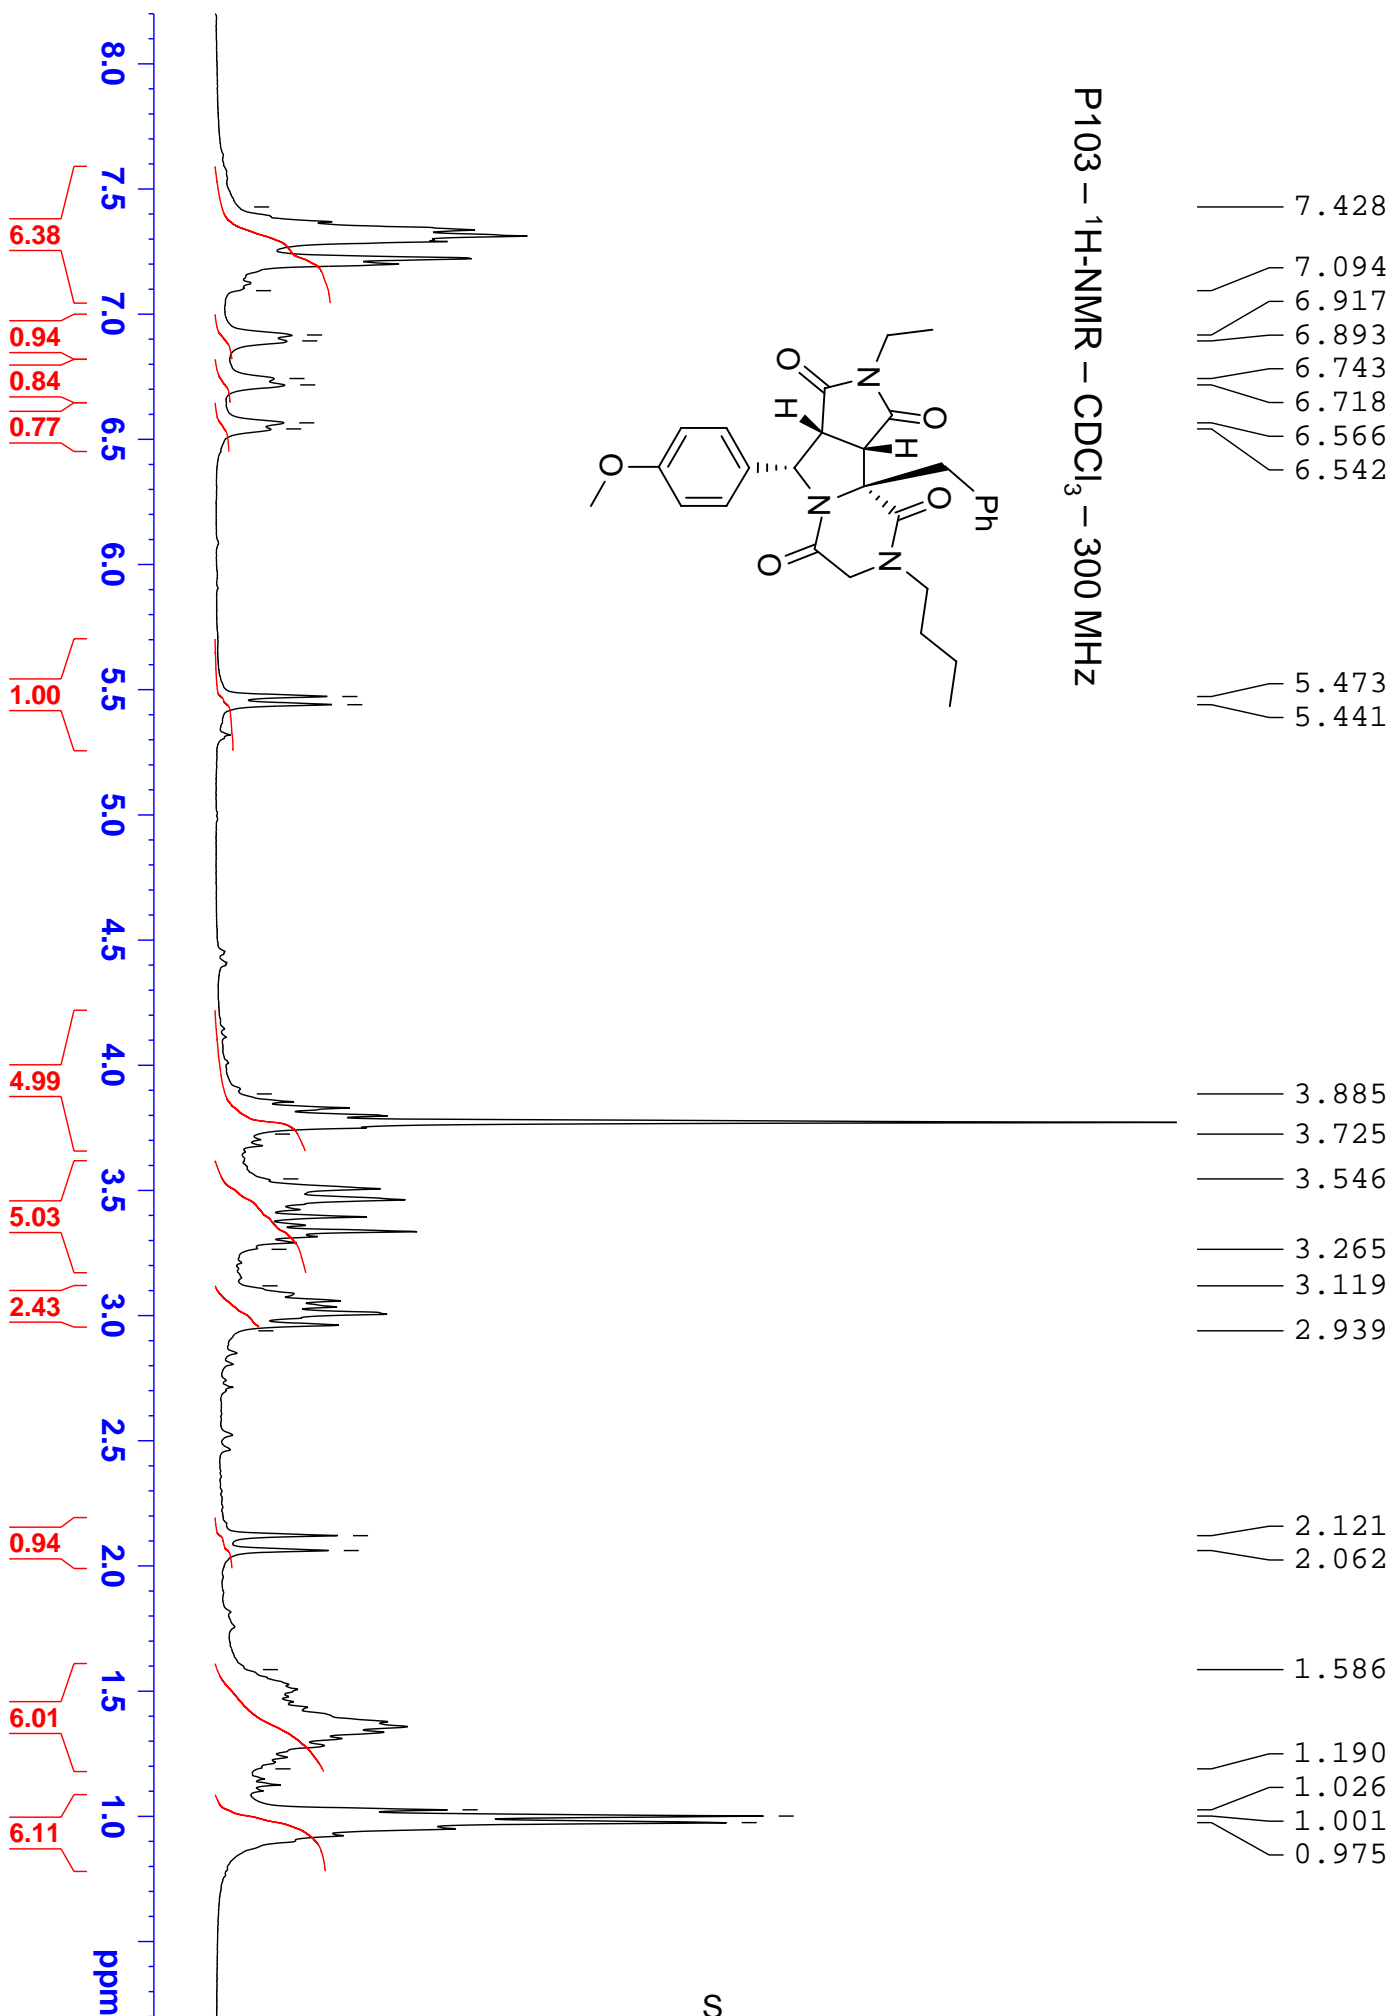

P103 – <sup>13</sup>C-NMR – CDCl<sub>3</sub> – 300 MHz

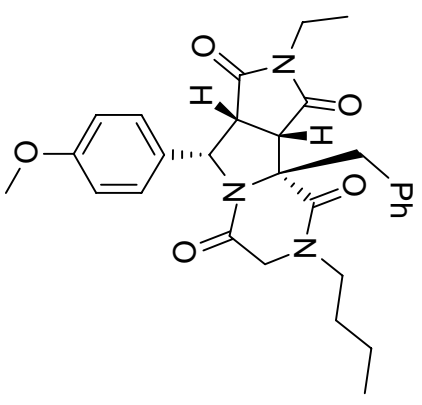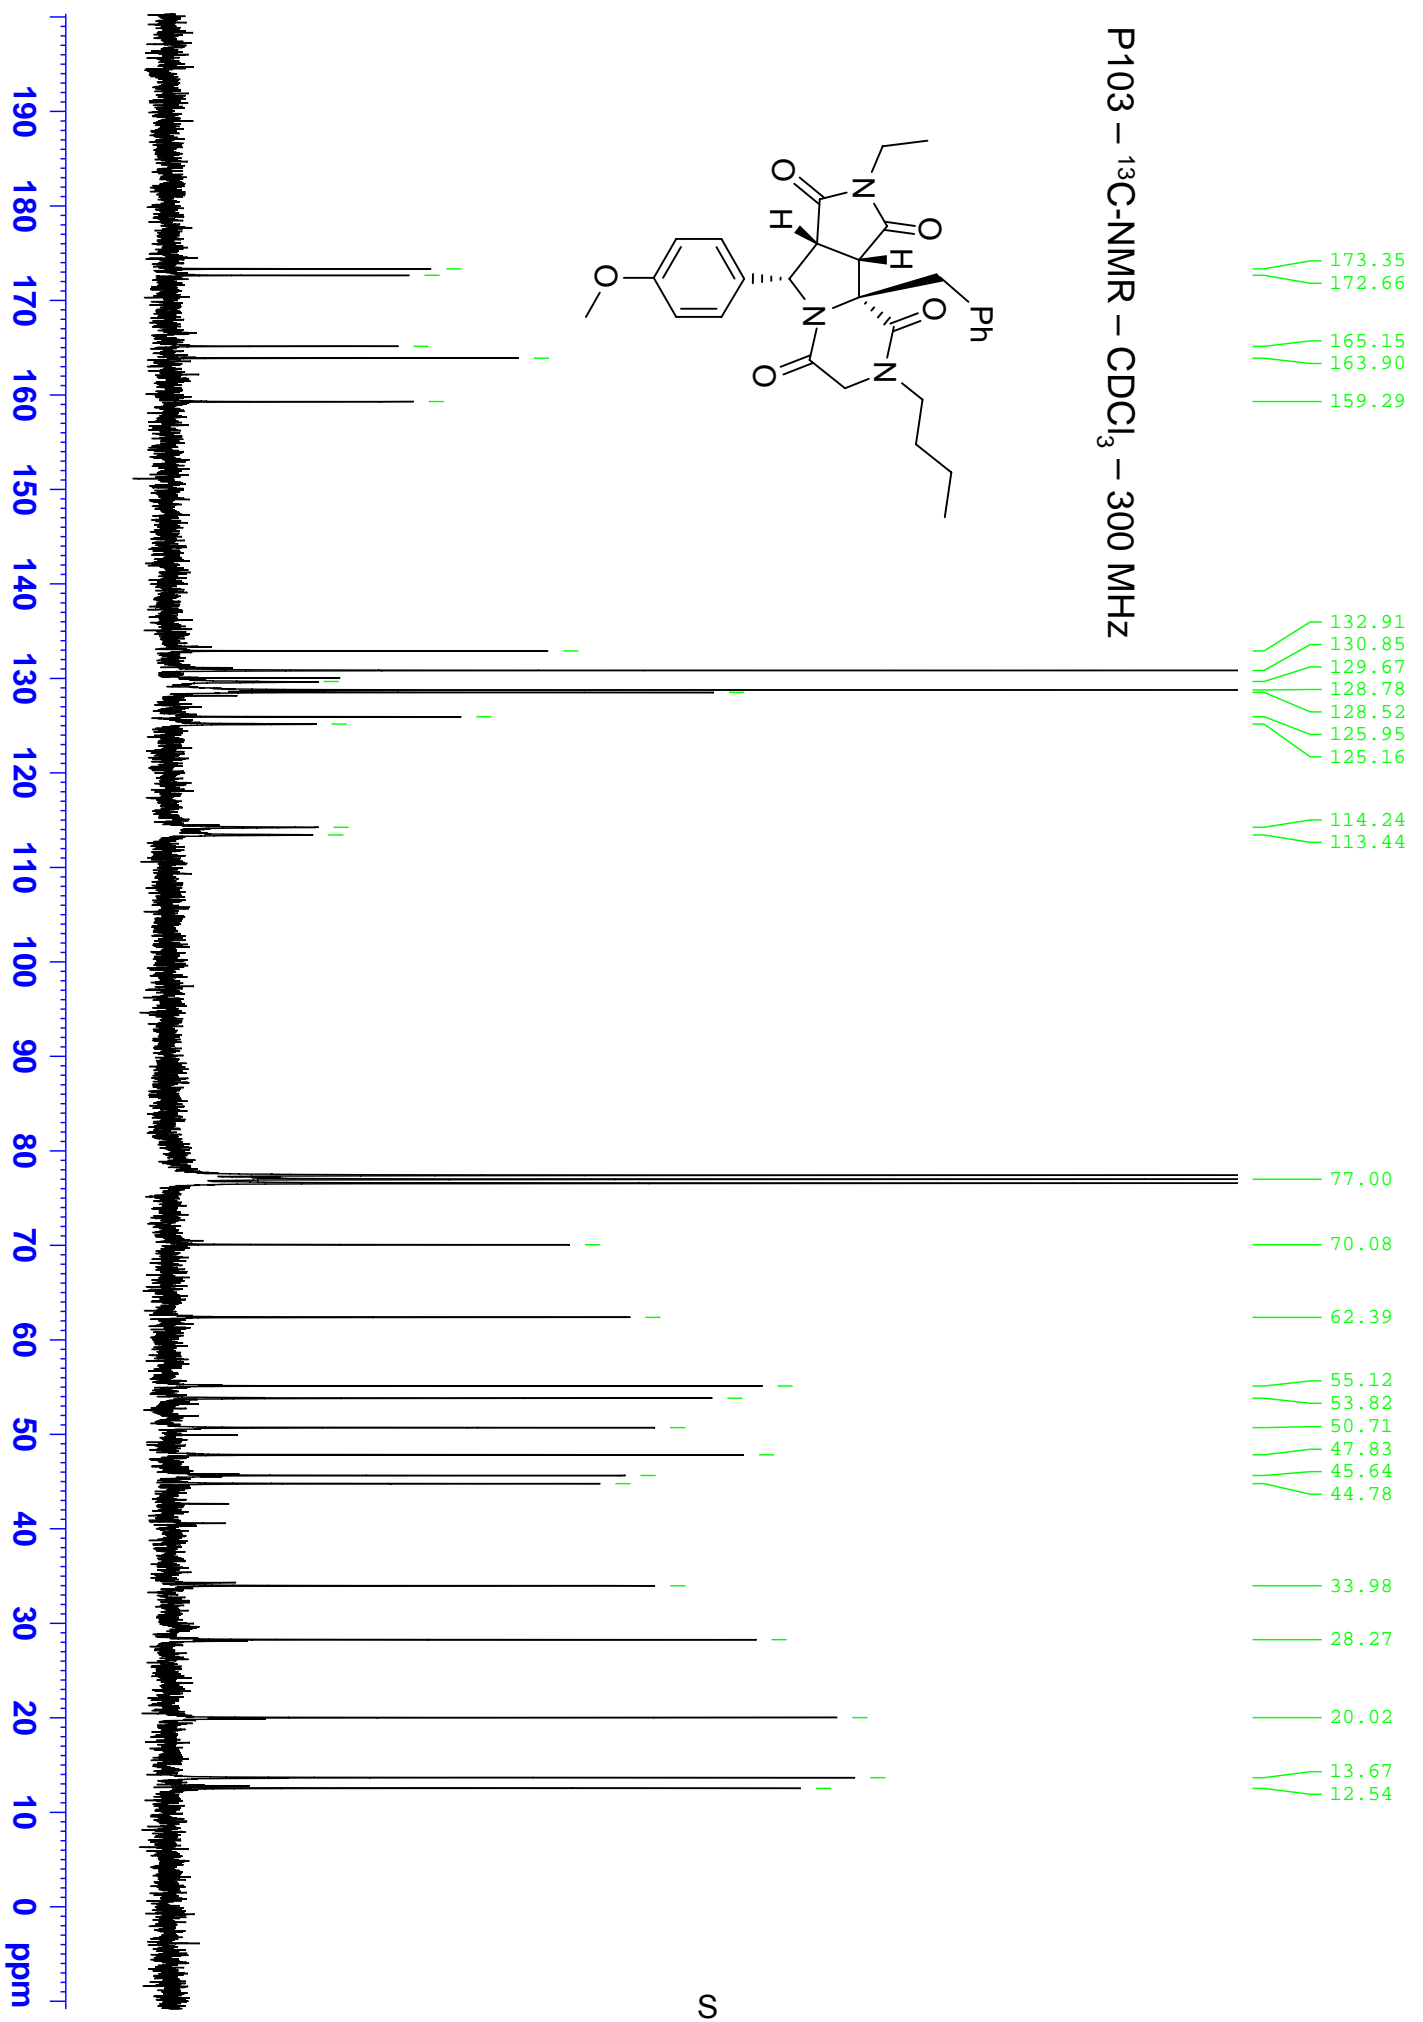

P104 – <sup>1</sup>H-NMR – CDCl<sub>3</sub> – 300 MHz

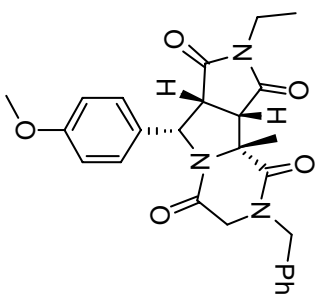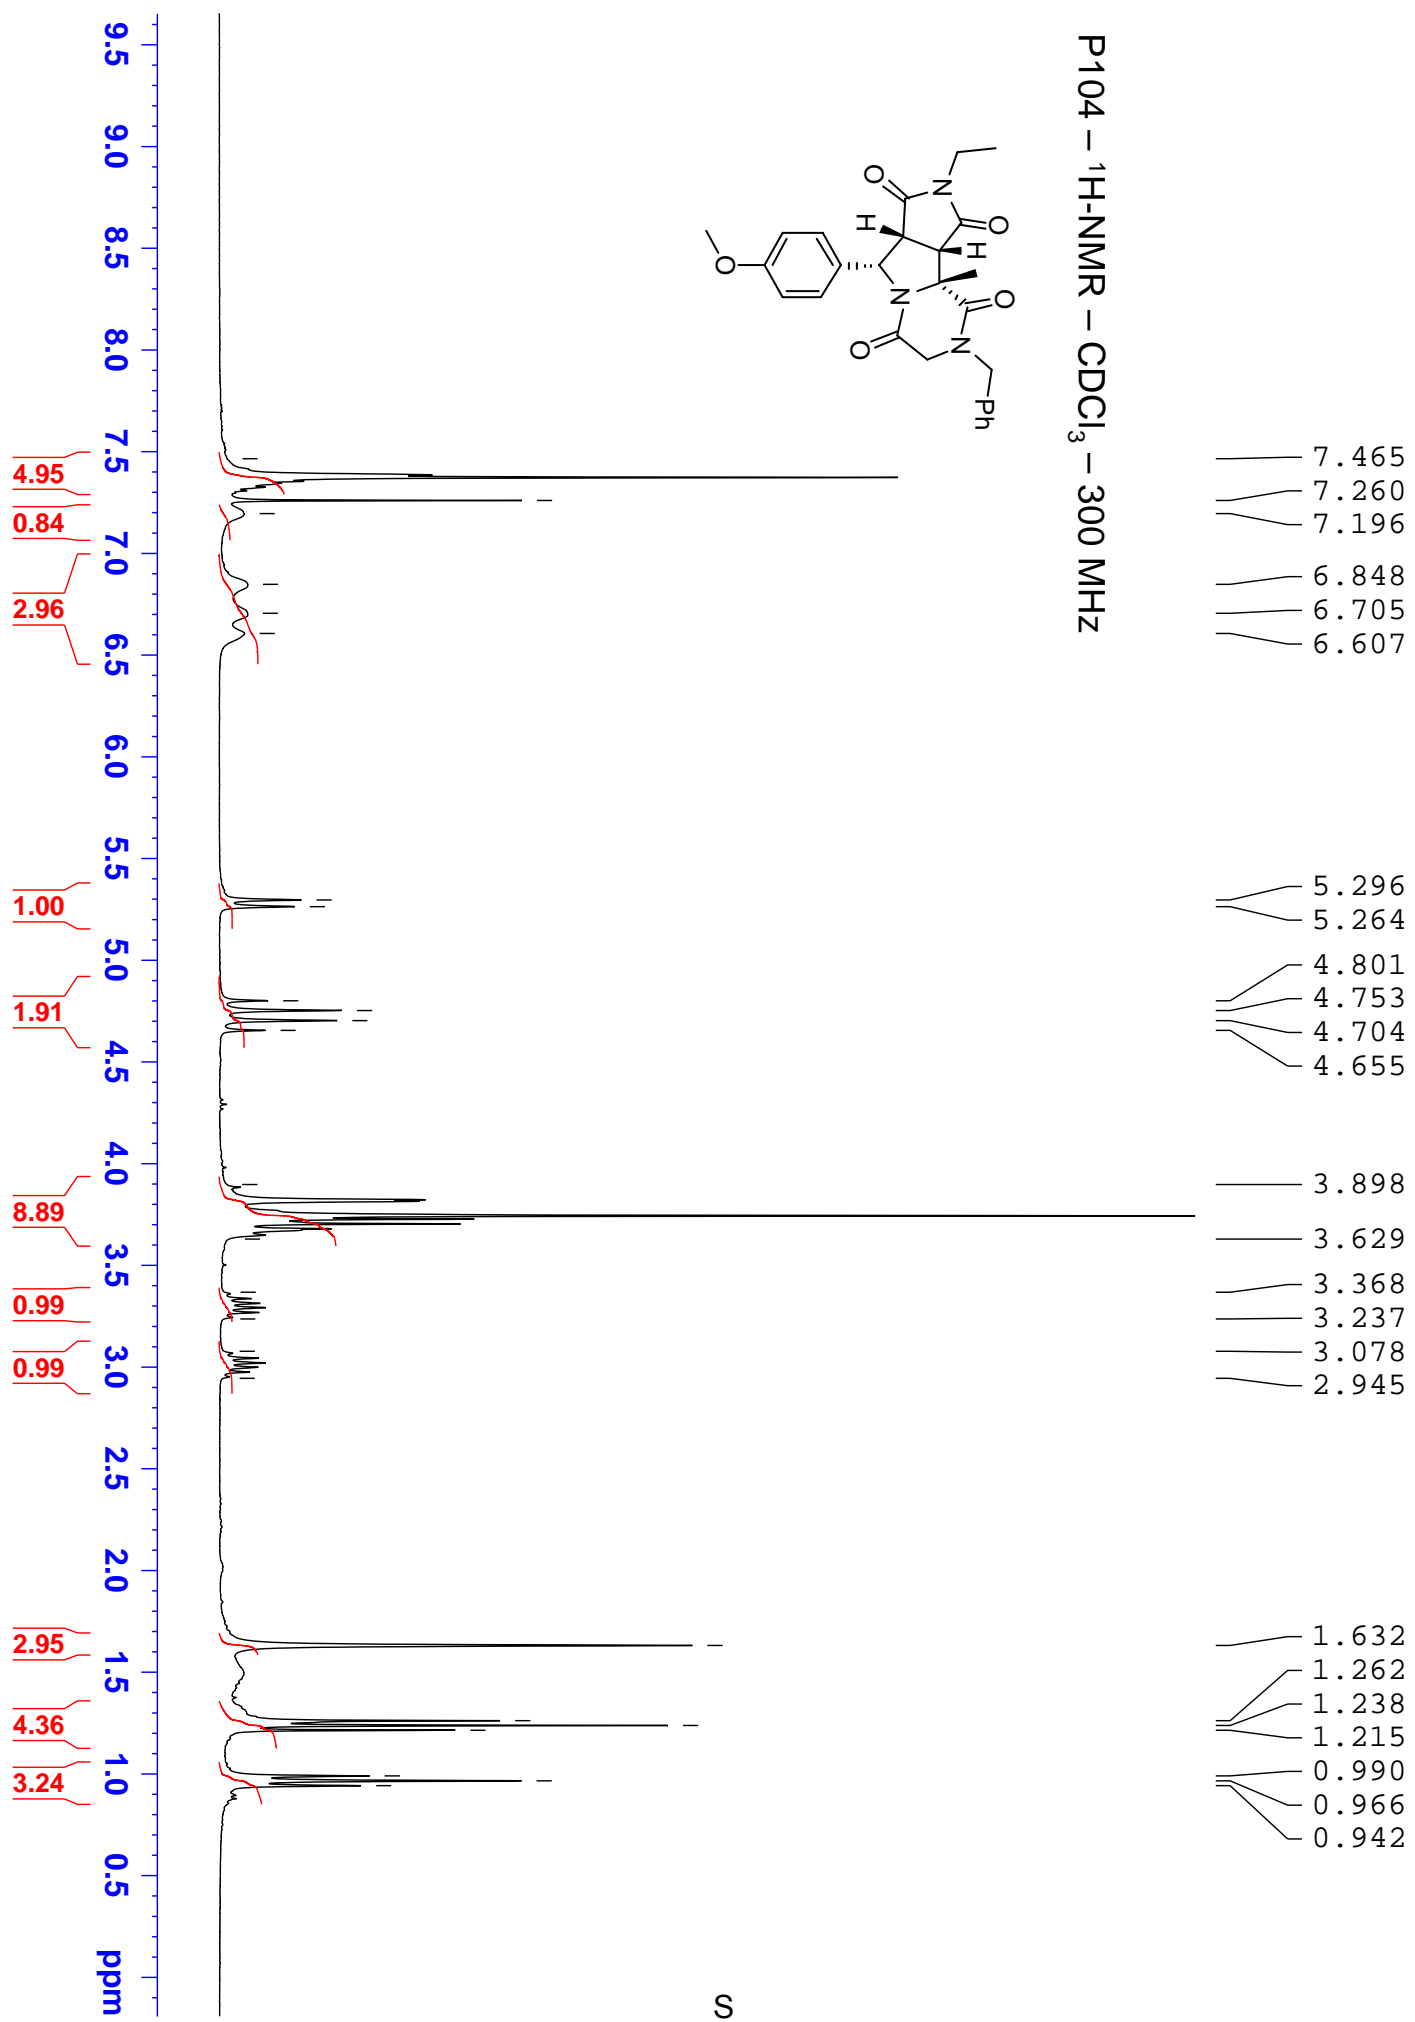

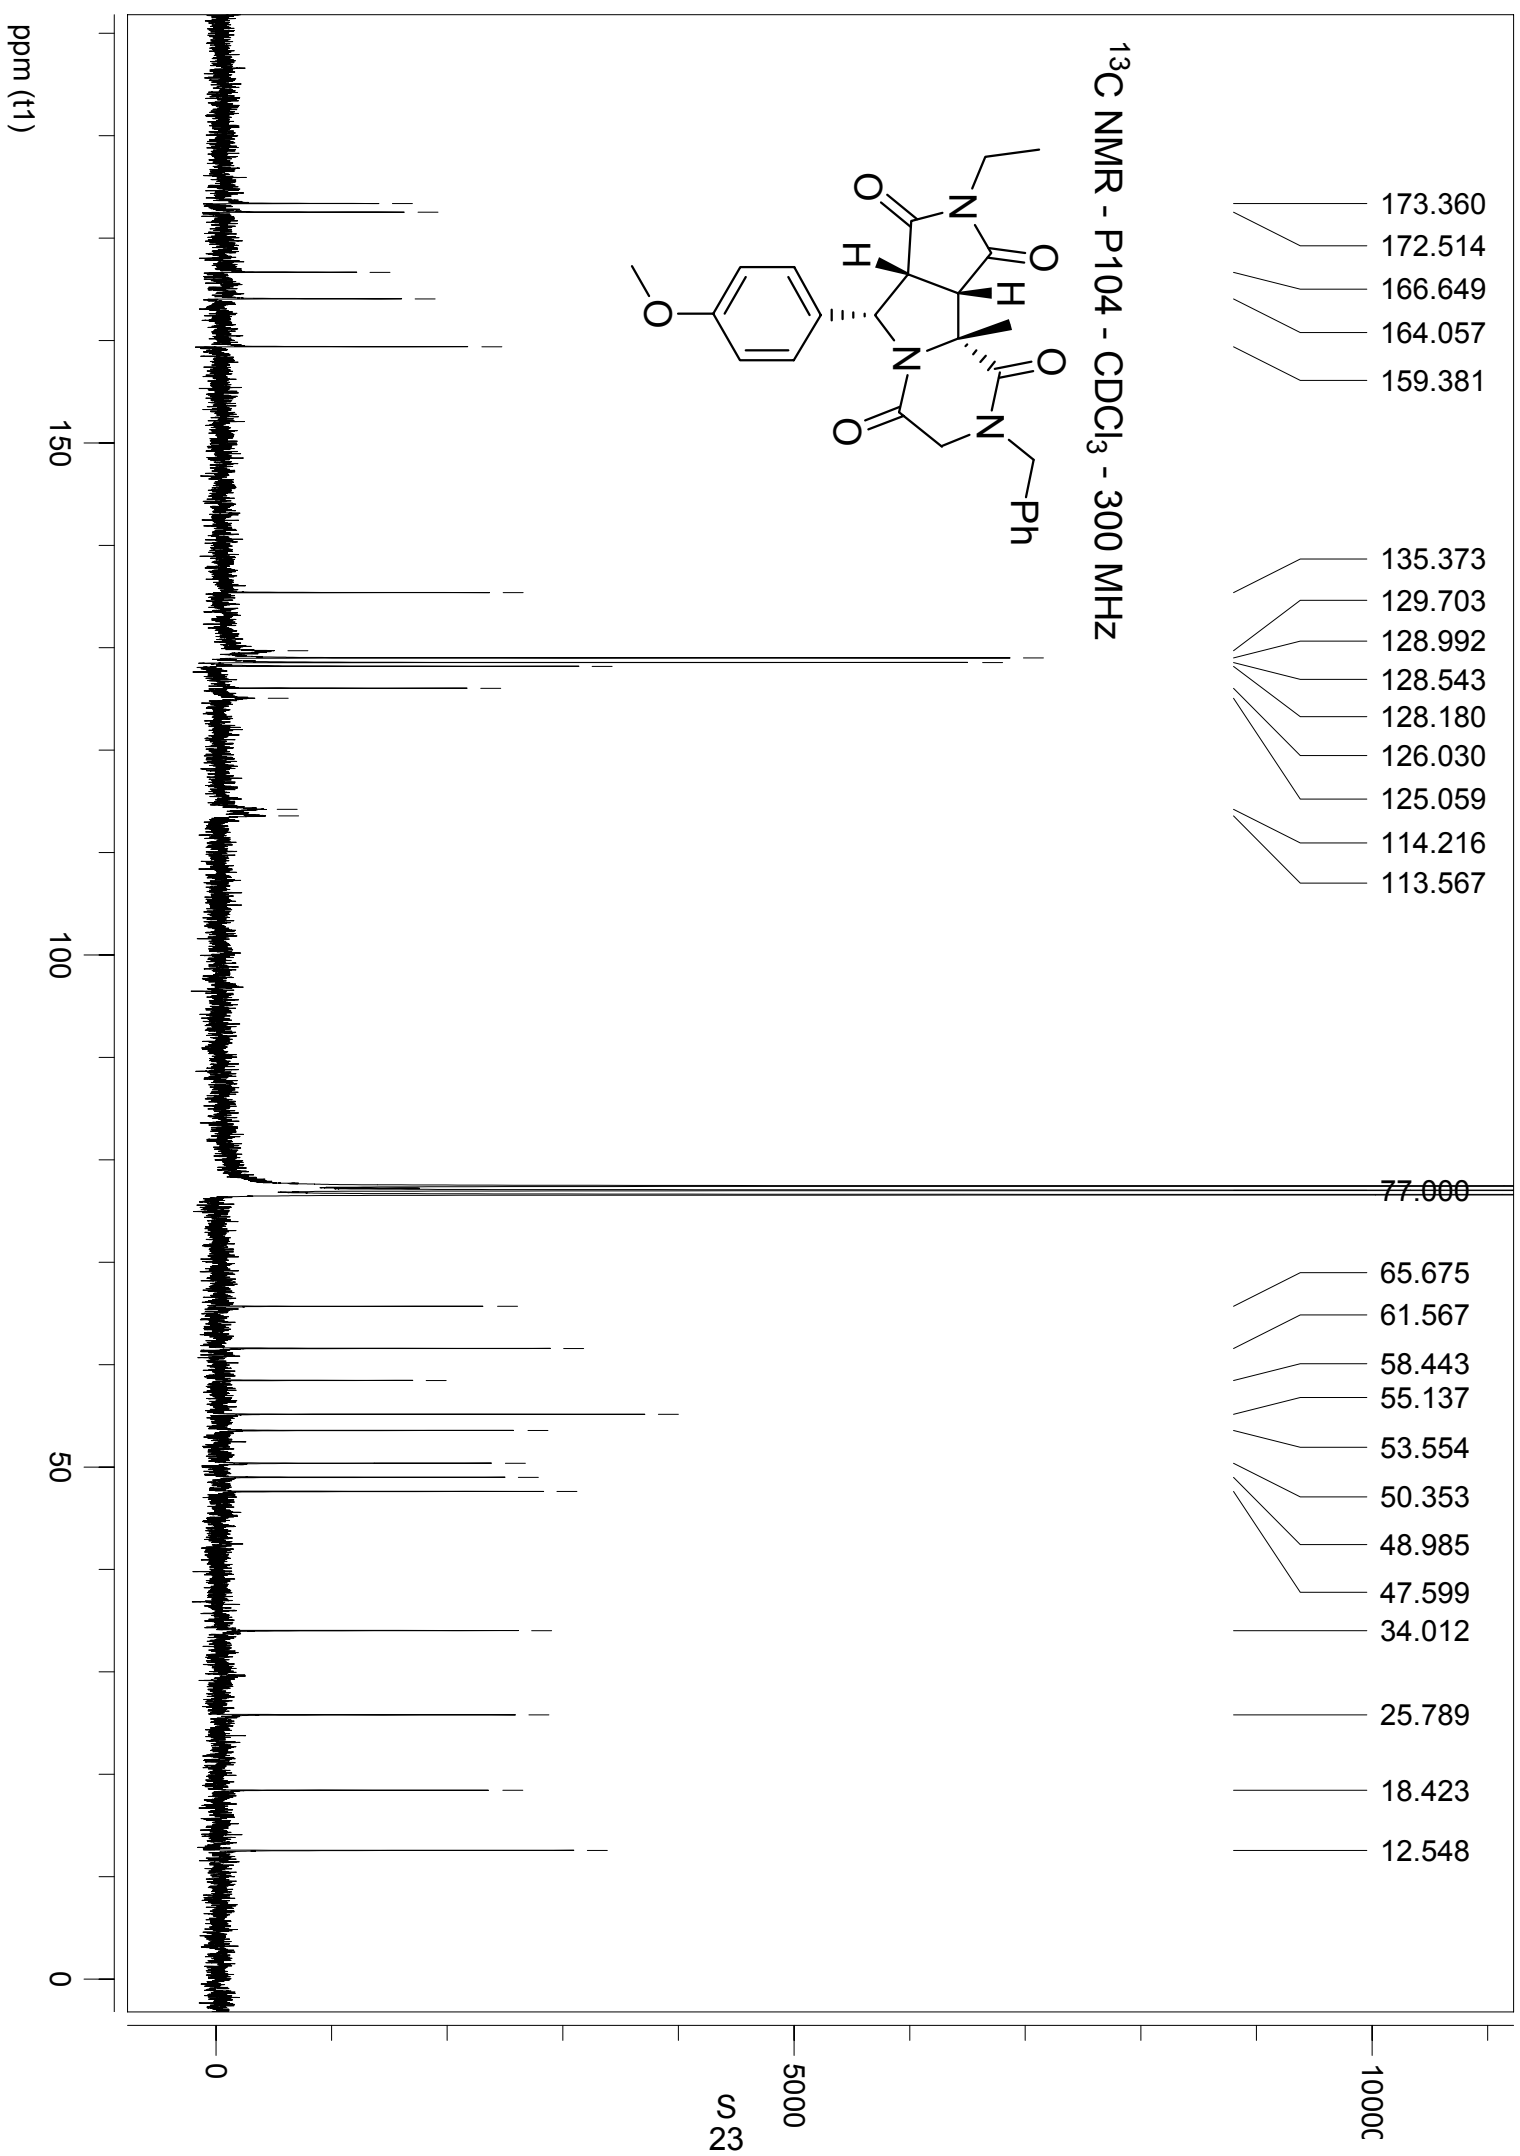

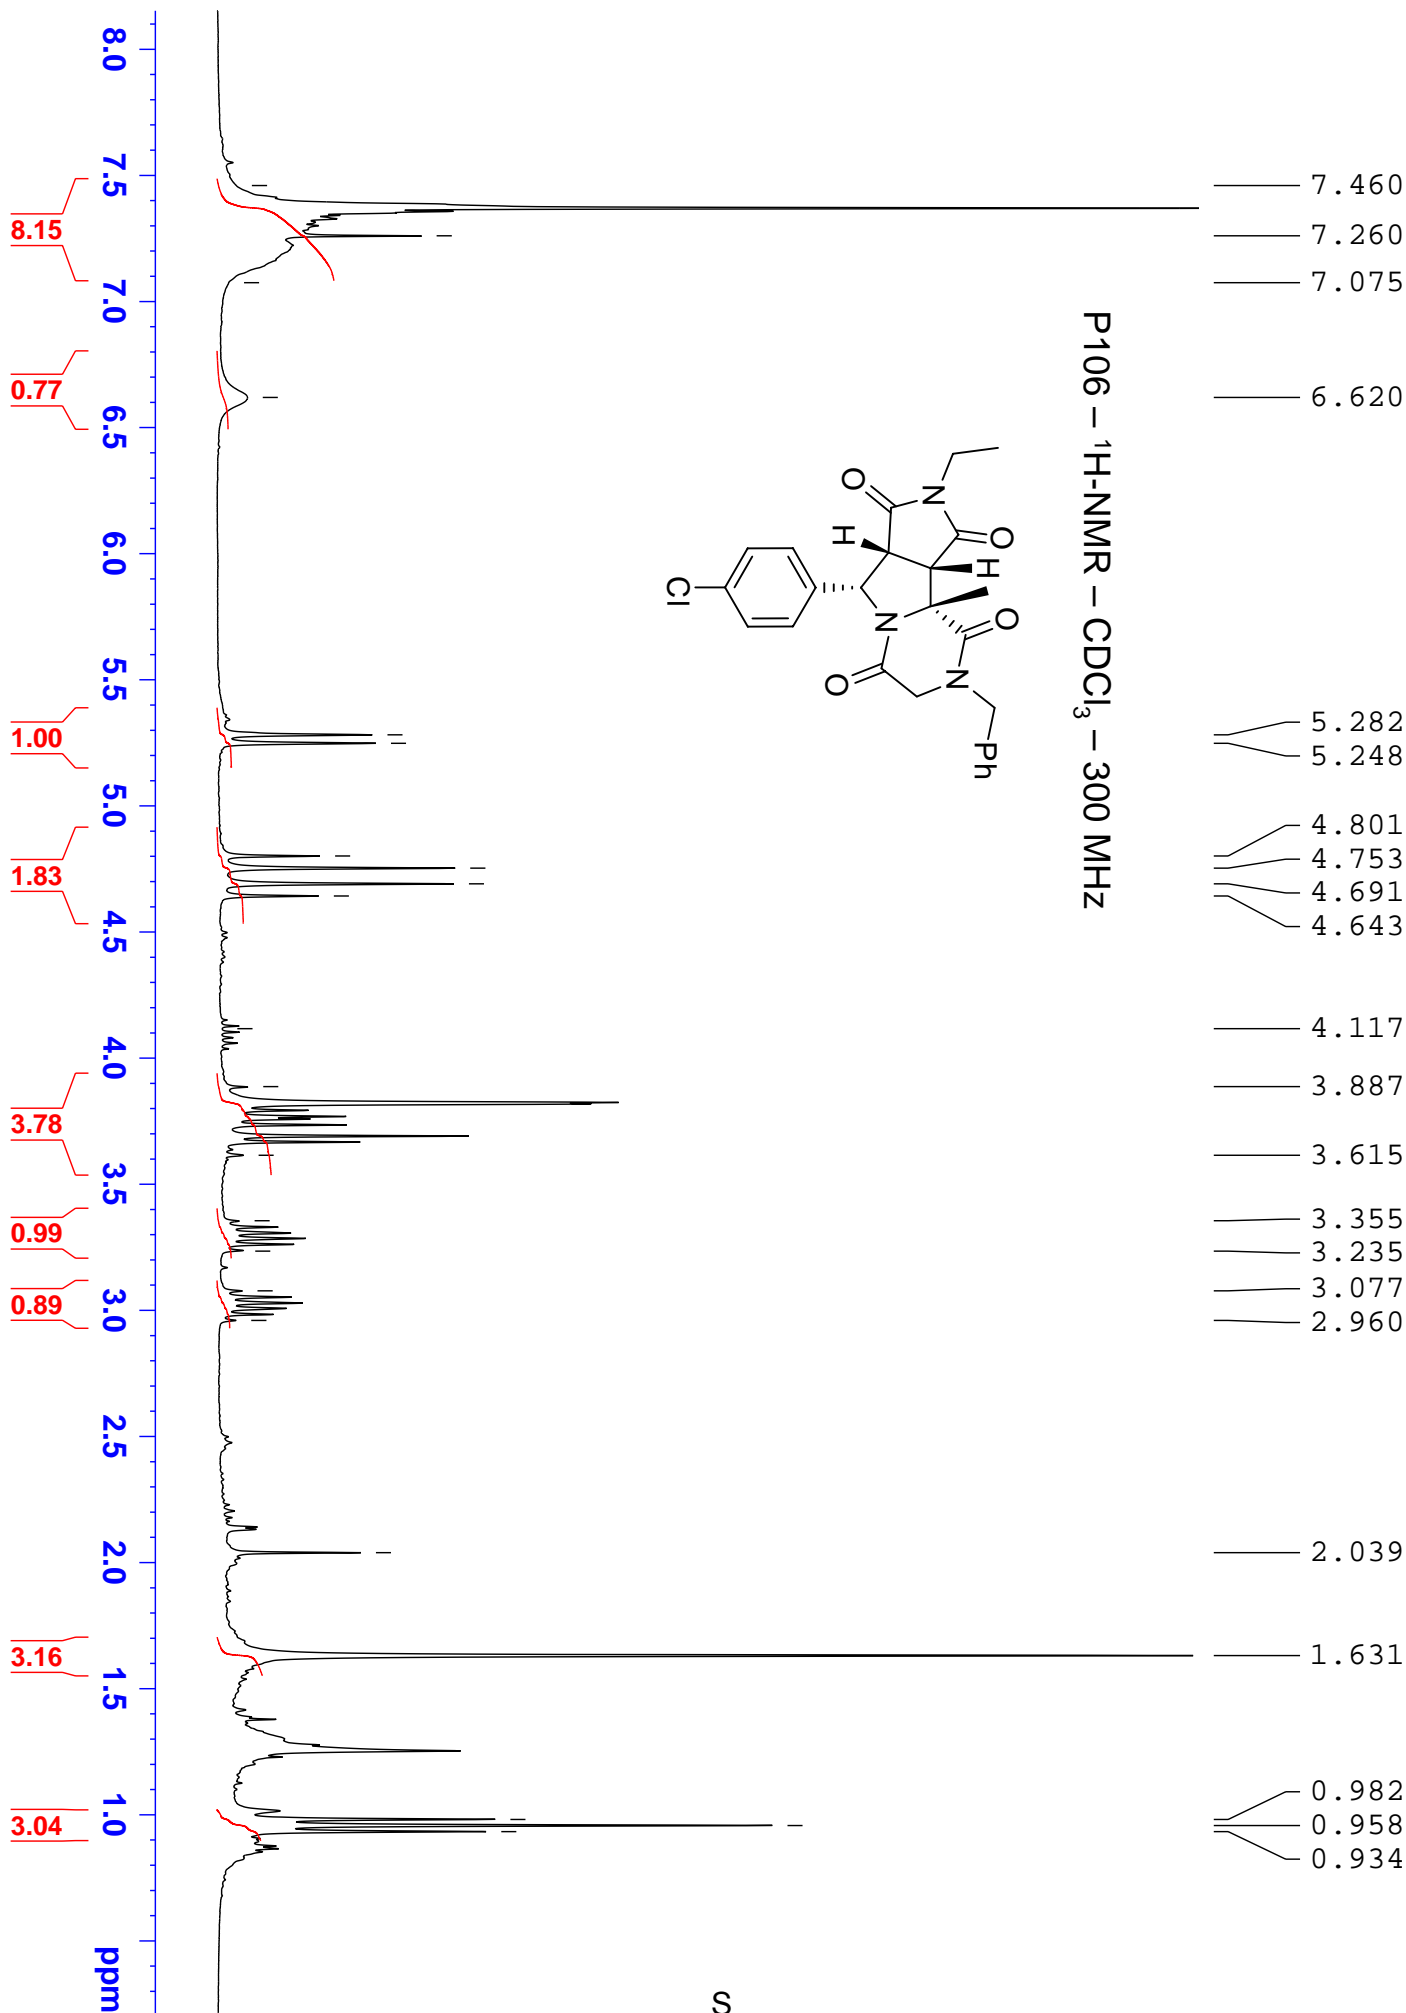



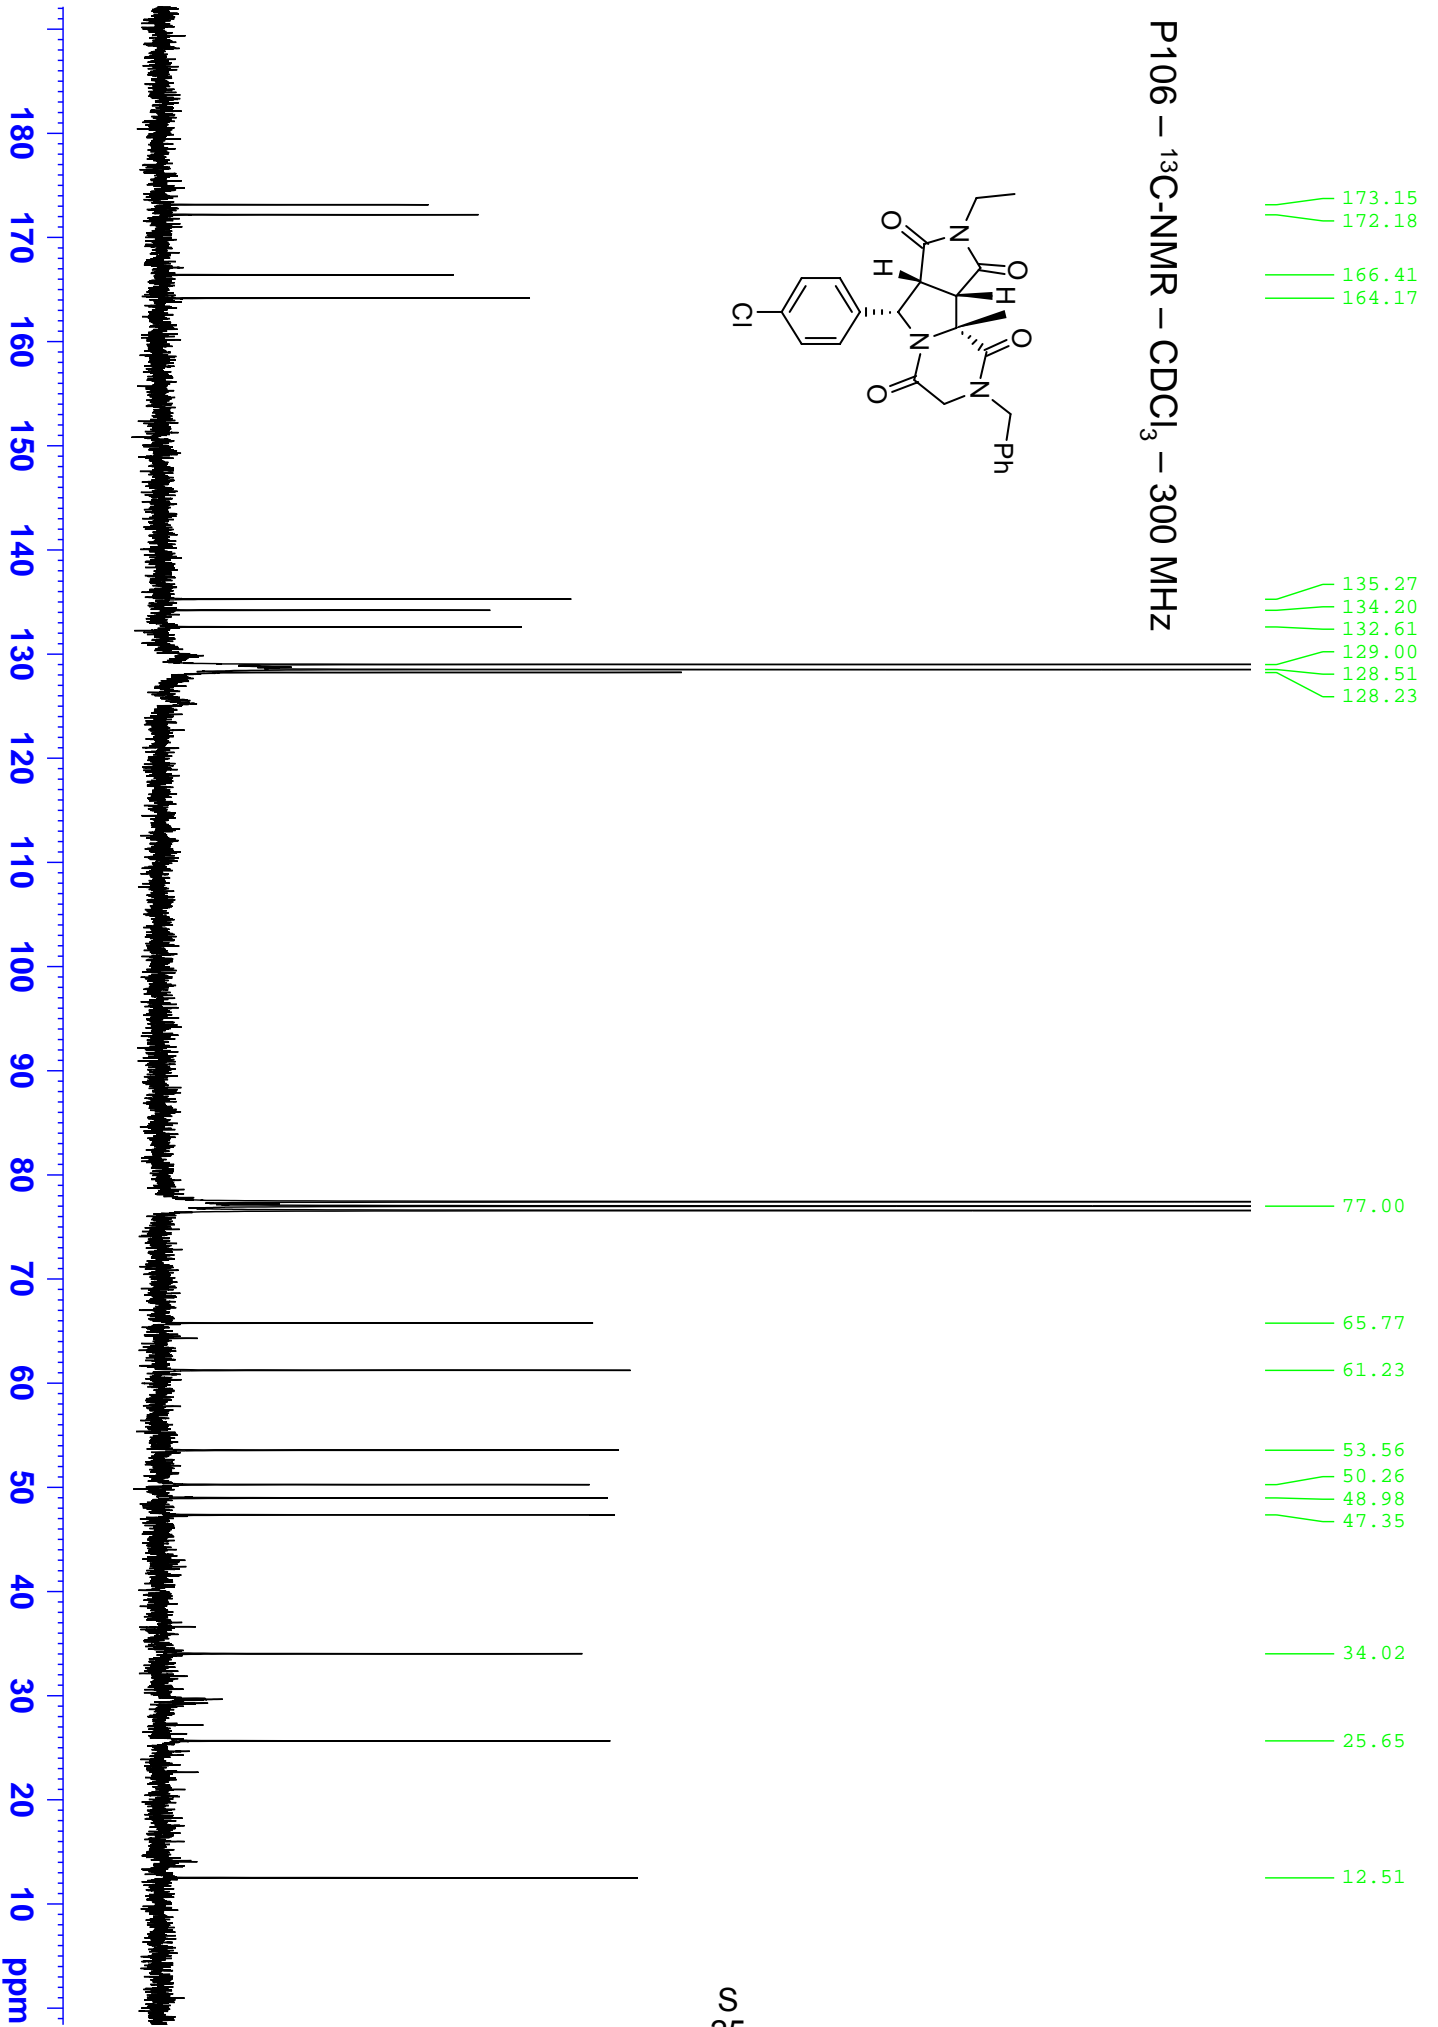

P108 – <sup>1</sup>H-NMR – CDCl<sub>3</sub> – 300 MHz

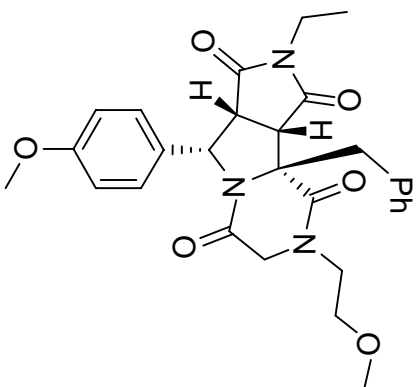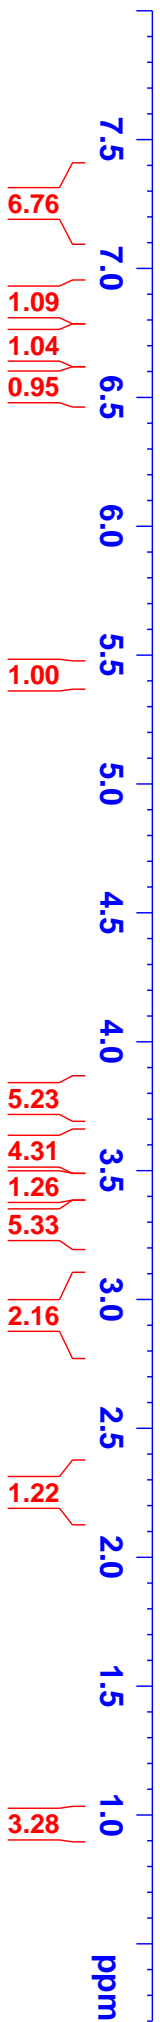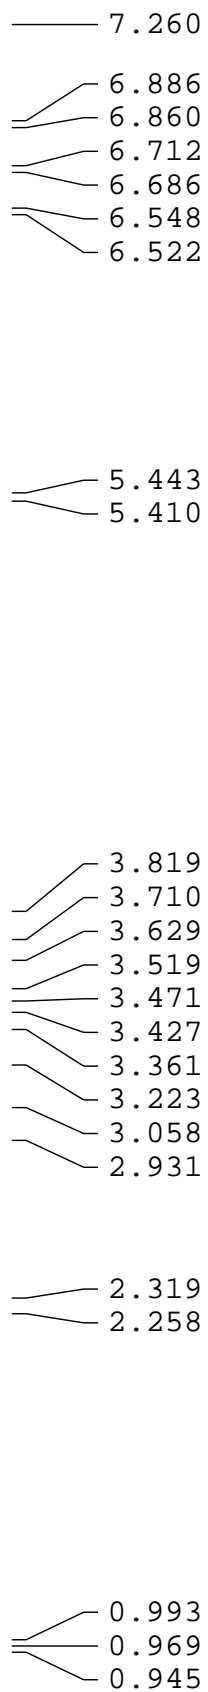

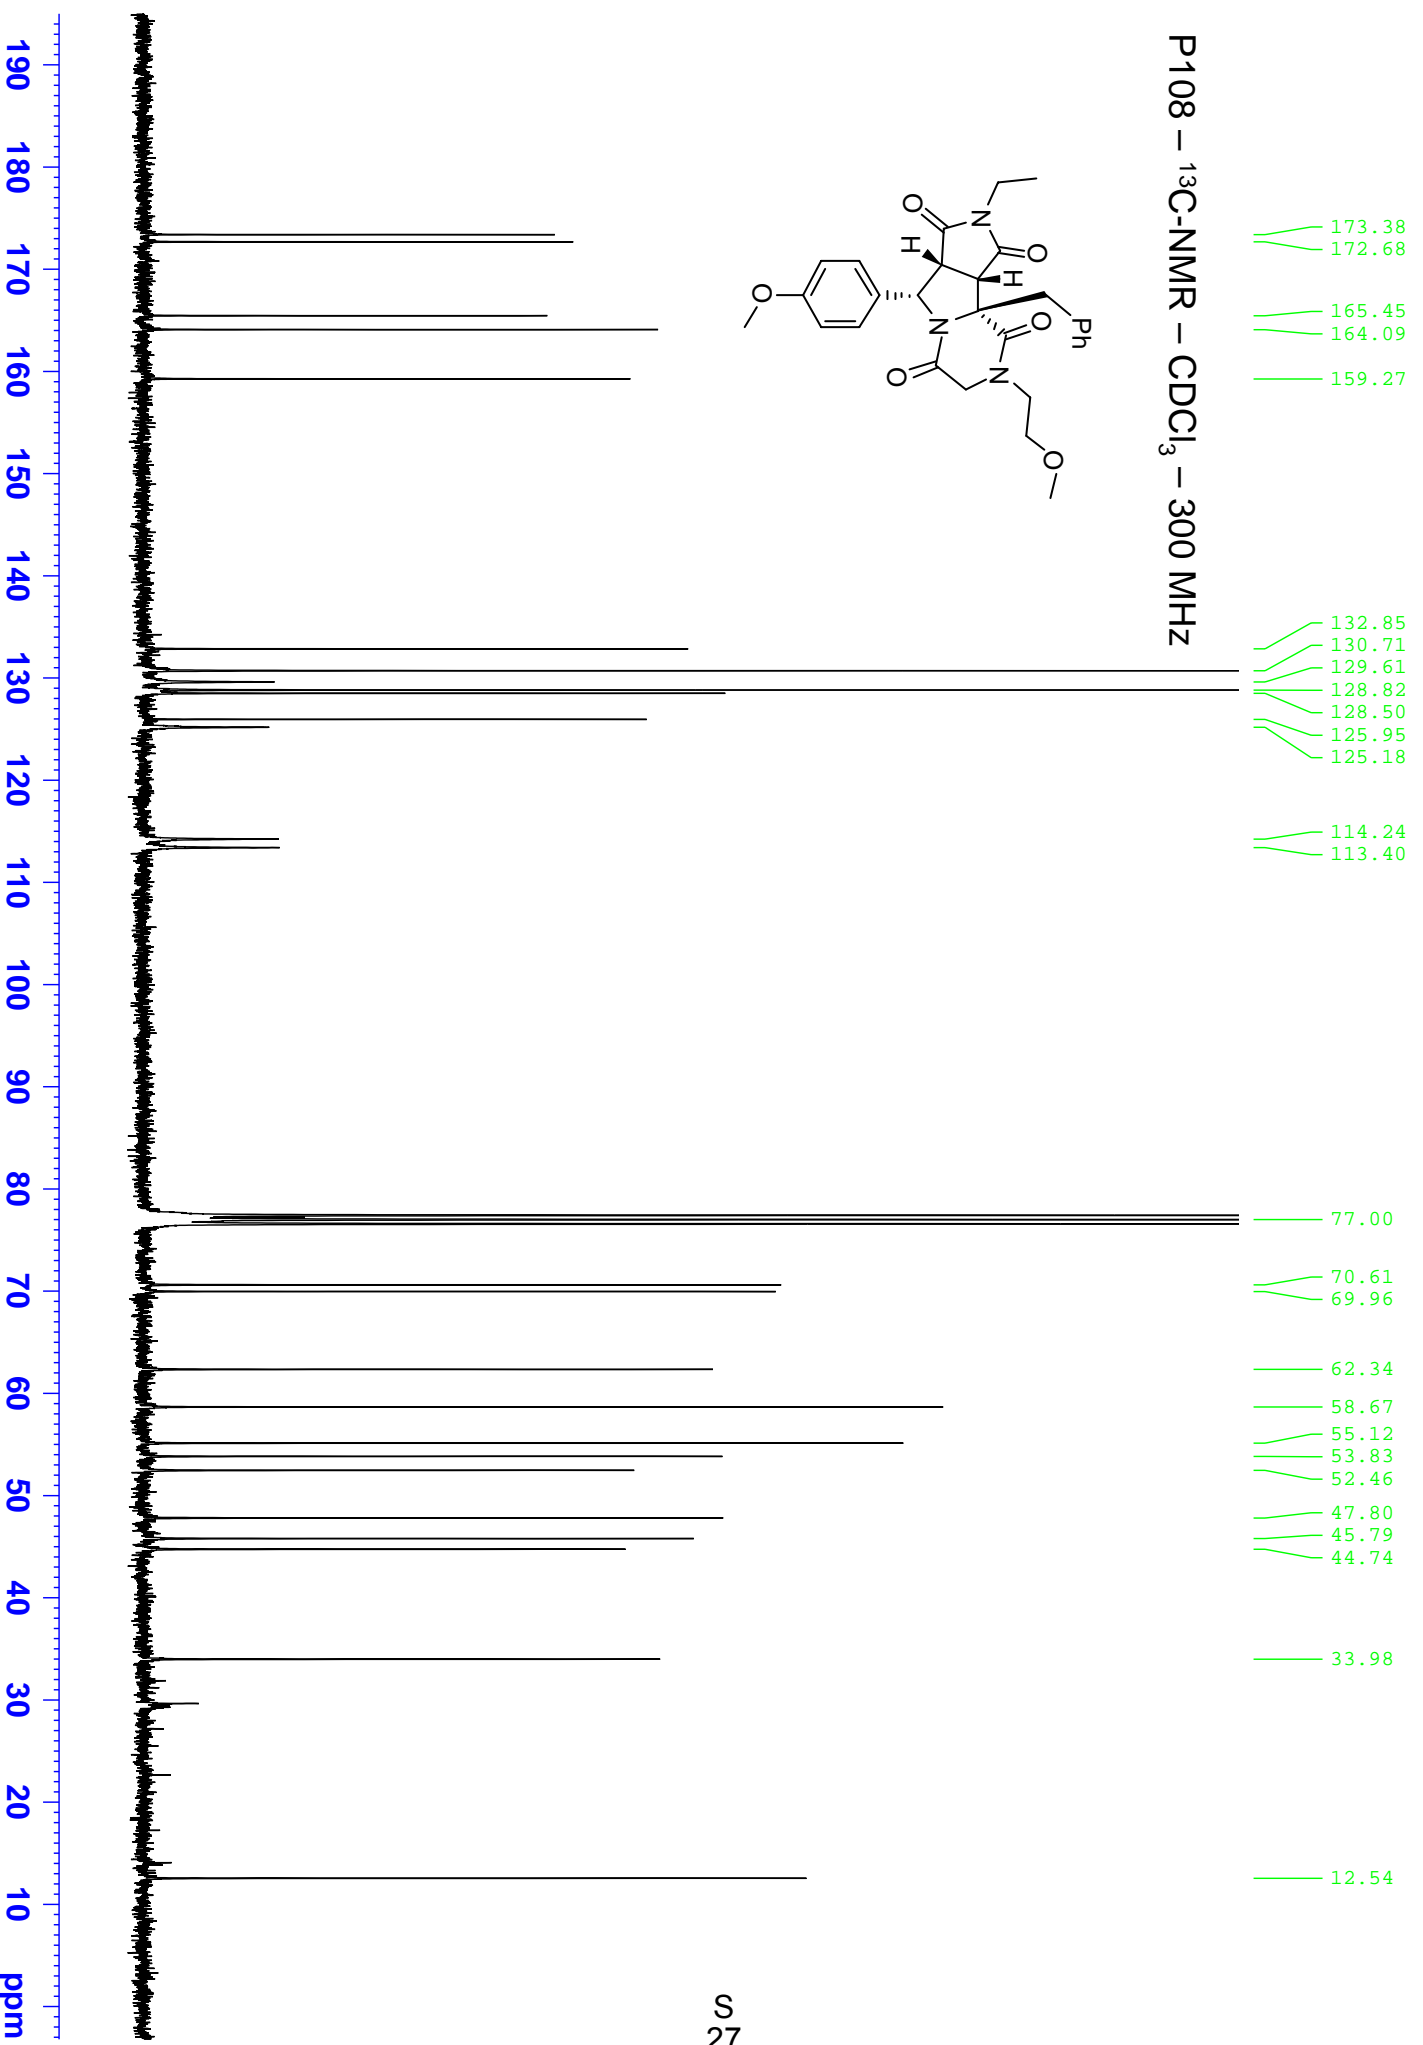

P109 – <sup>1</sup>H-NMR – CDCl<sub>3</sub> – 300 MHz

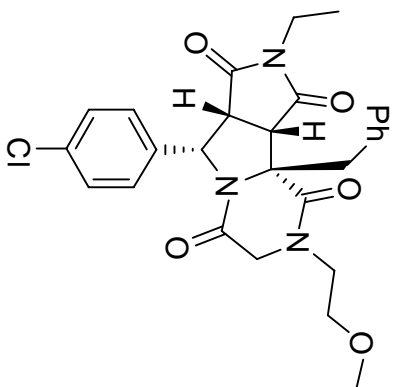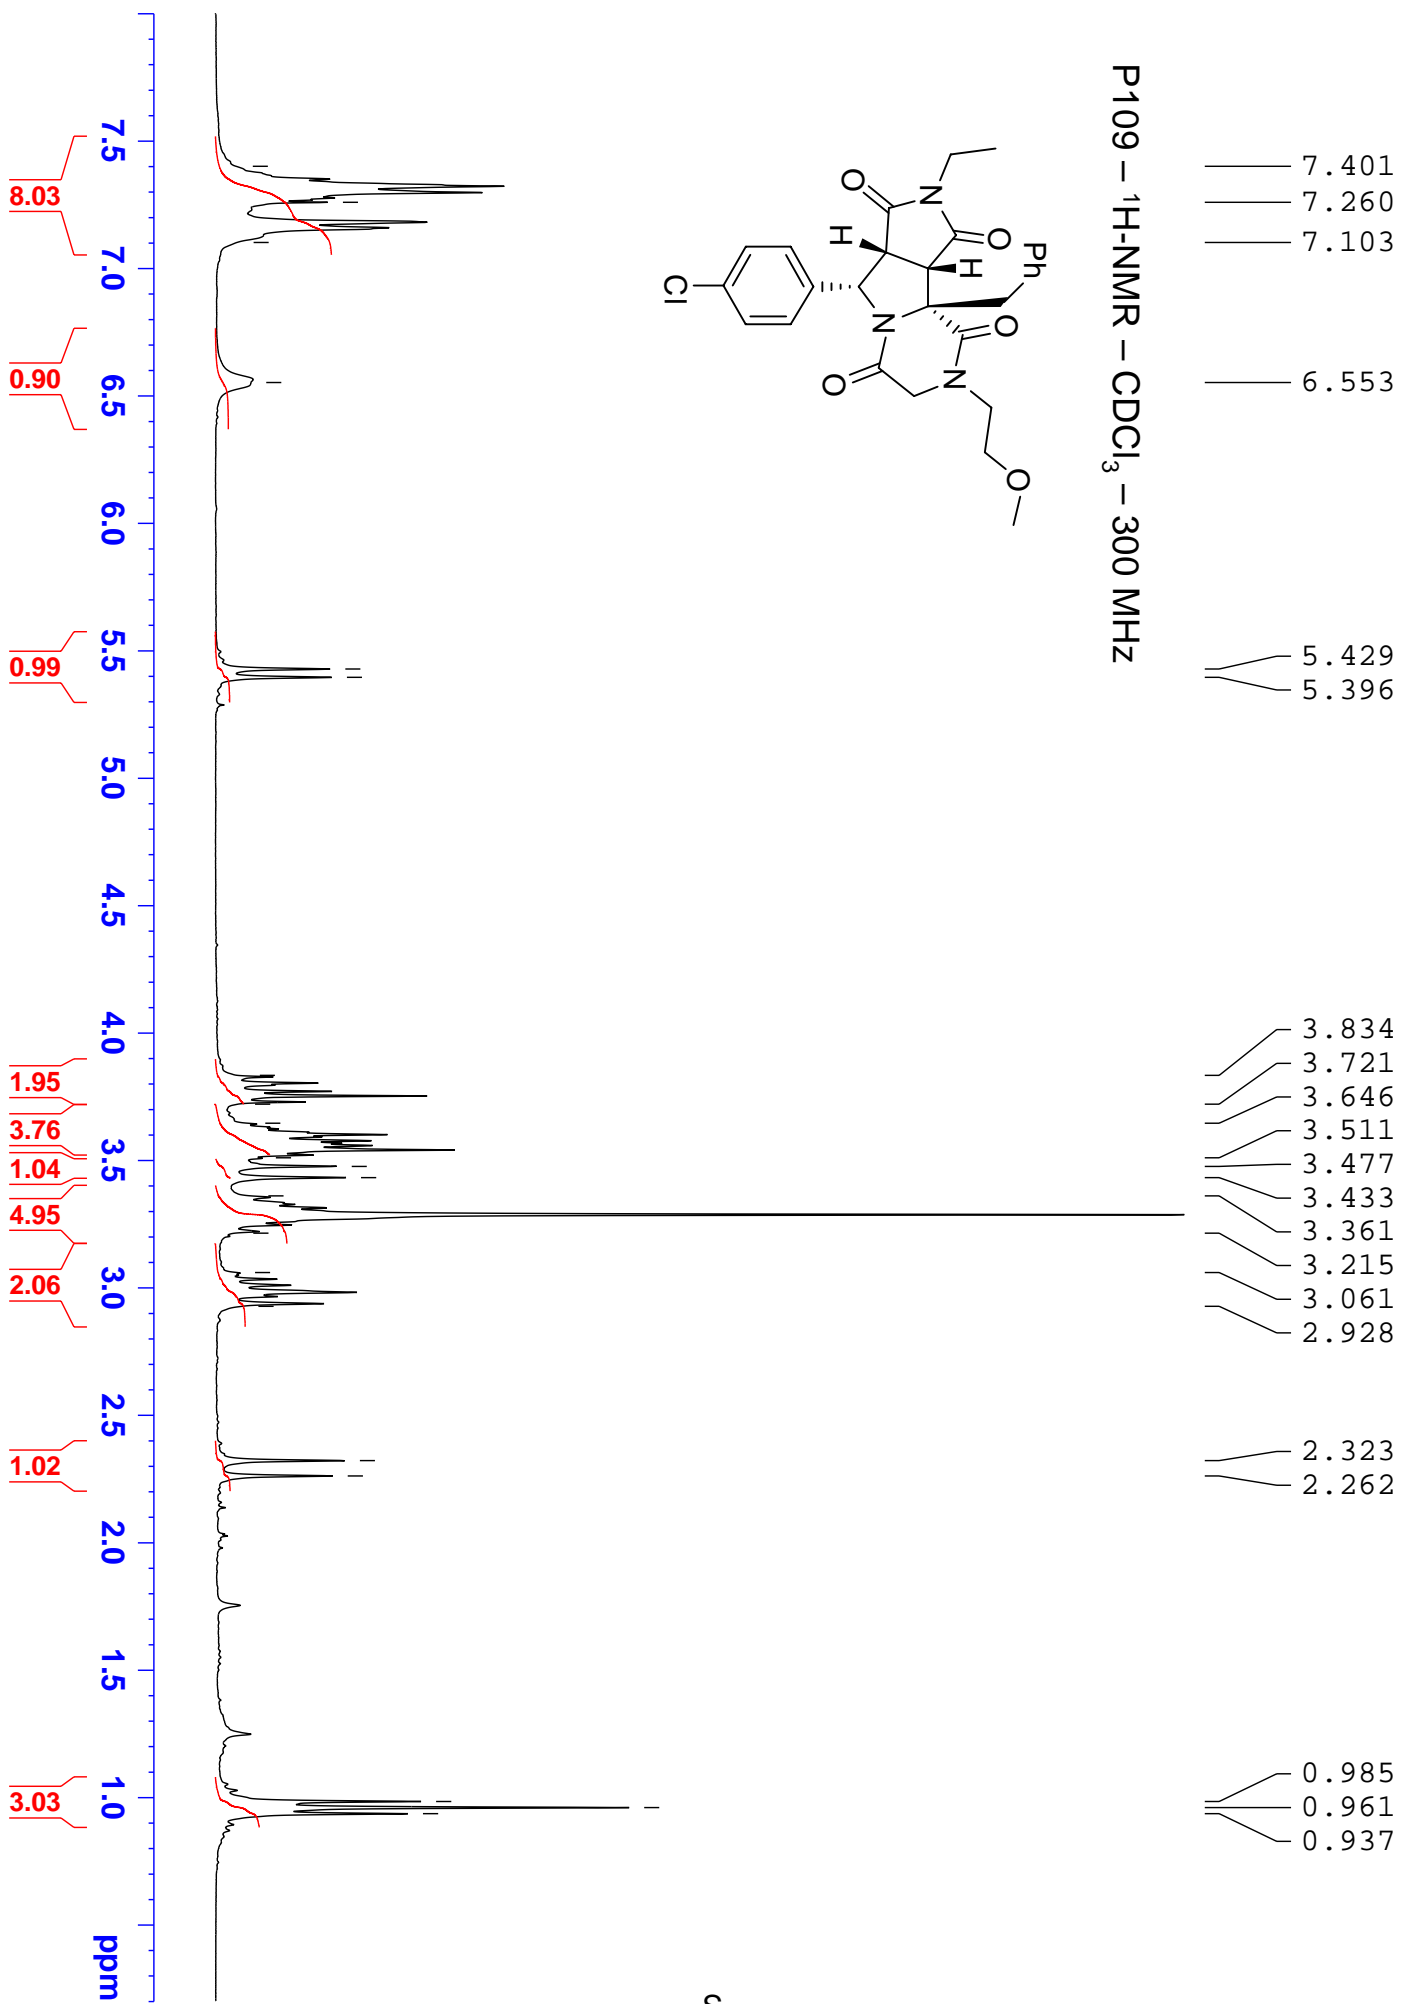

P109 – <sup>13</sup>C-NMR – CDCl<sub>3</sub> – 300 MHz

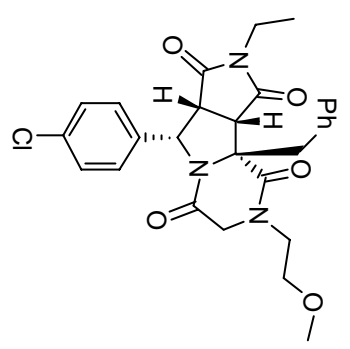

173.14  
172.33

165.26  
164.20

134.05  
132.71  
132.55  
130.66  
129.86  
128.86  
128.58  
128.46  
125.47

77.00

70.61  
70.08

62.04  
58.65

53.88  
52.44

47.60  
45.84  
44.70

34.01

12.52

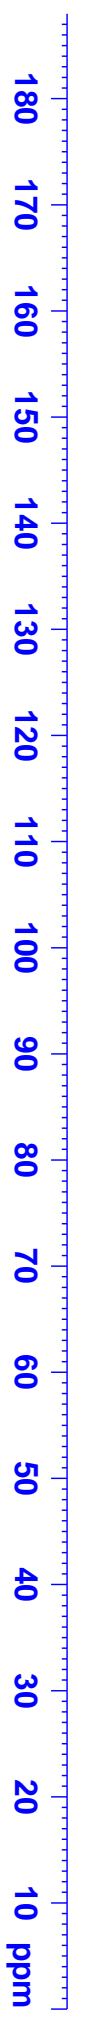

P112 – <sup>1</sup>H-NMR – CDCl<sub>3</sub> – 300 MHz

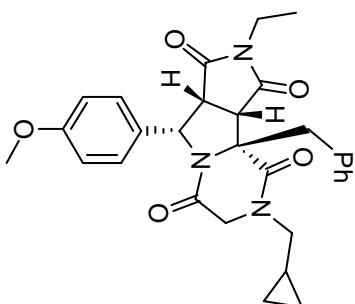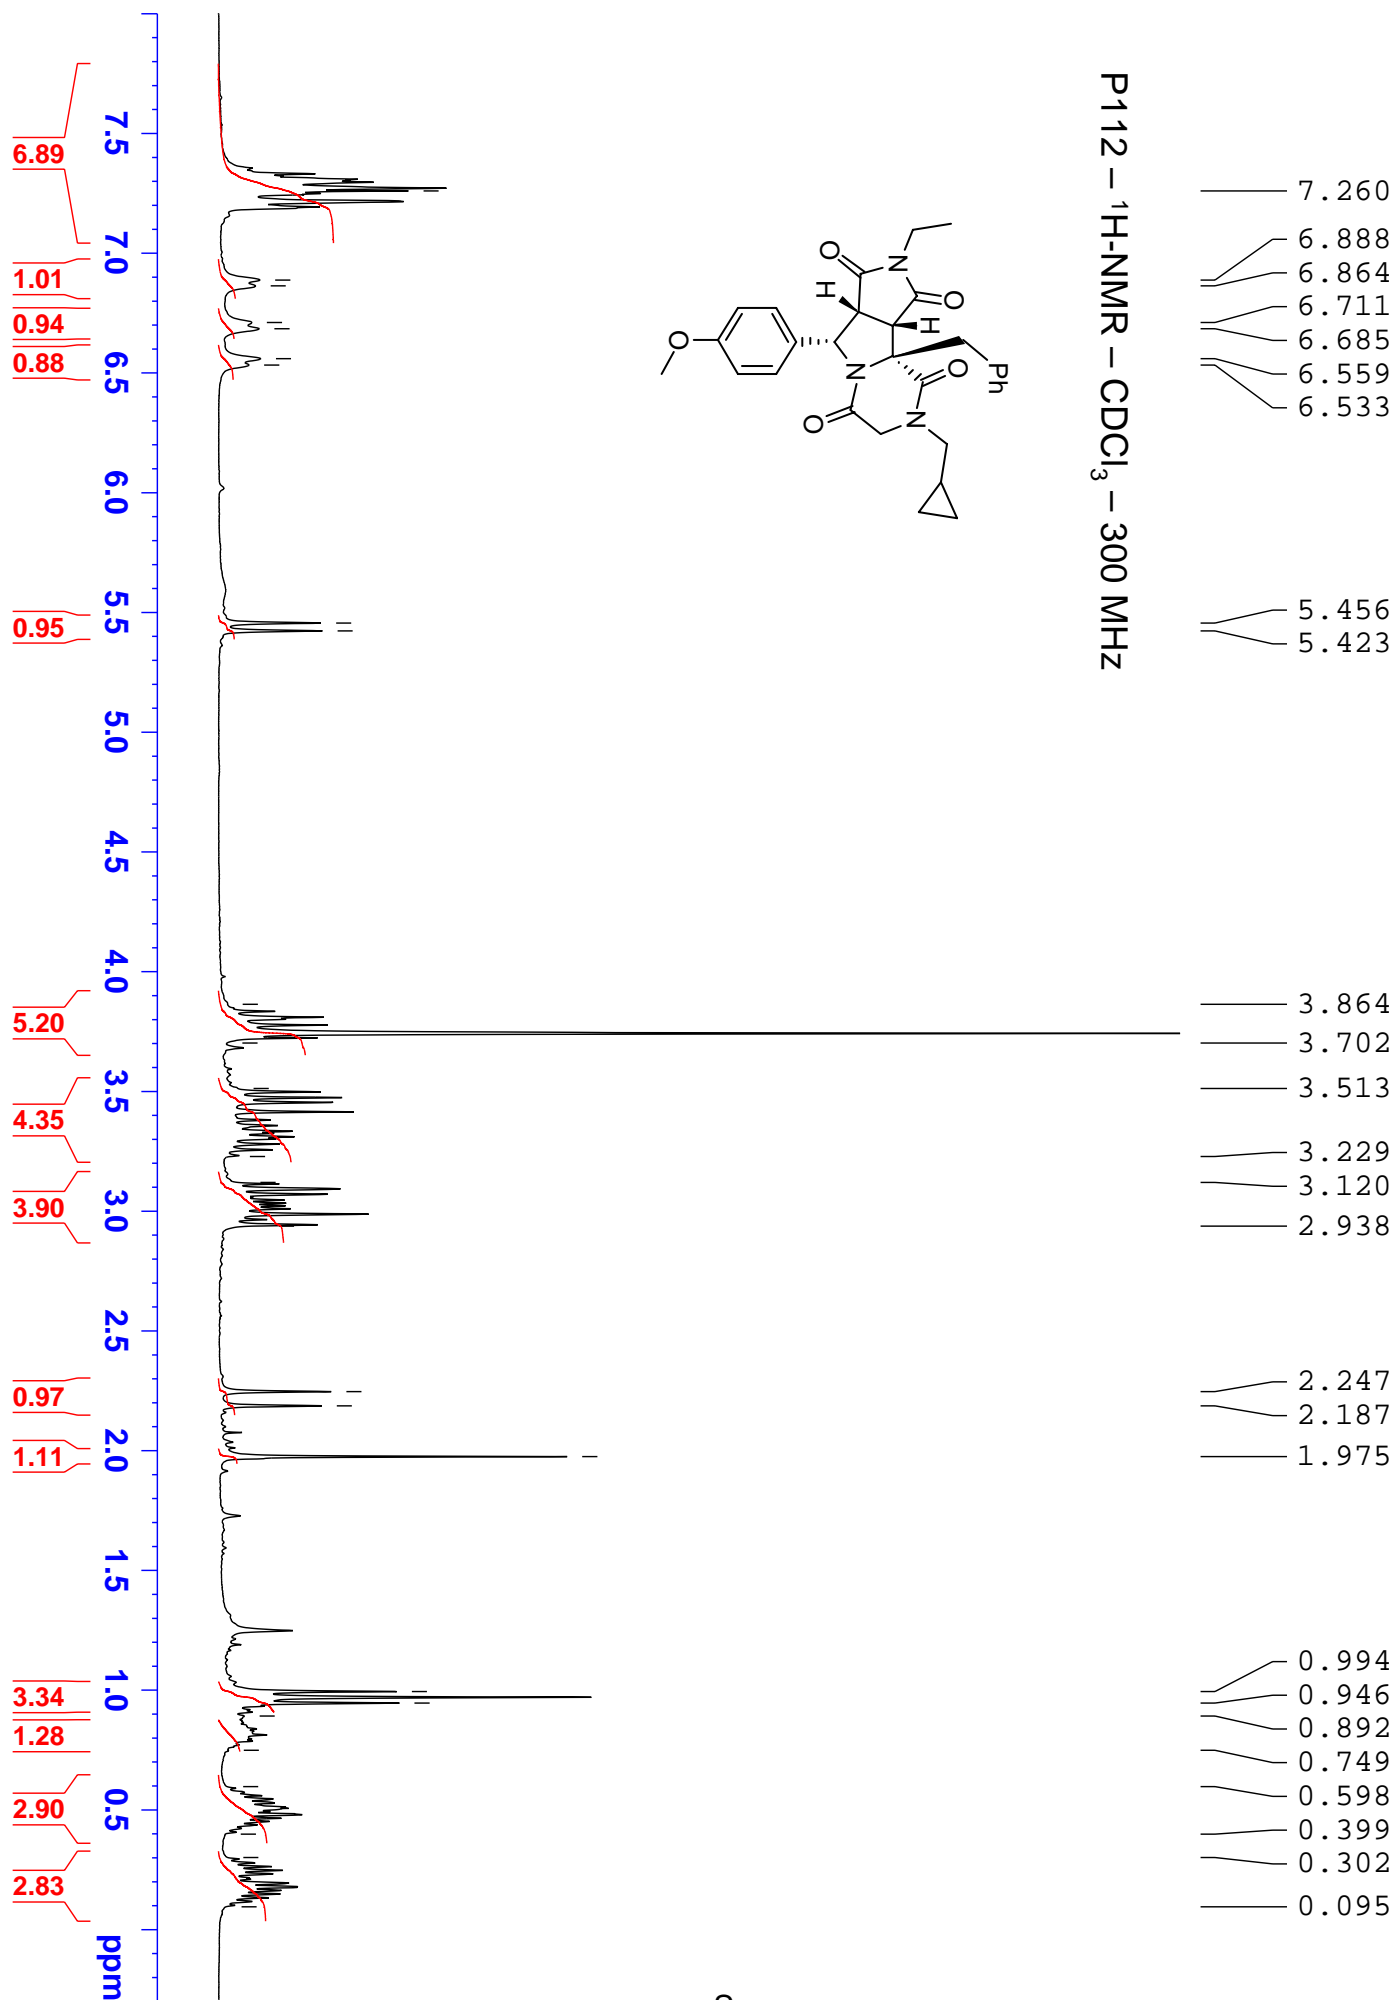

P112 – <sup>13</sup>C-NMR – CDCl<sub>3</sub> – 300 MHz

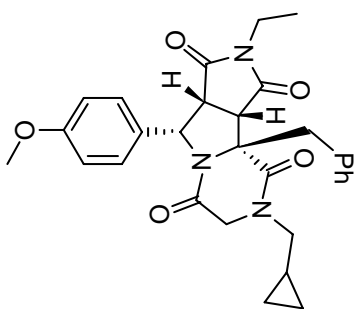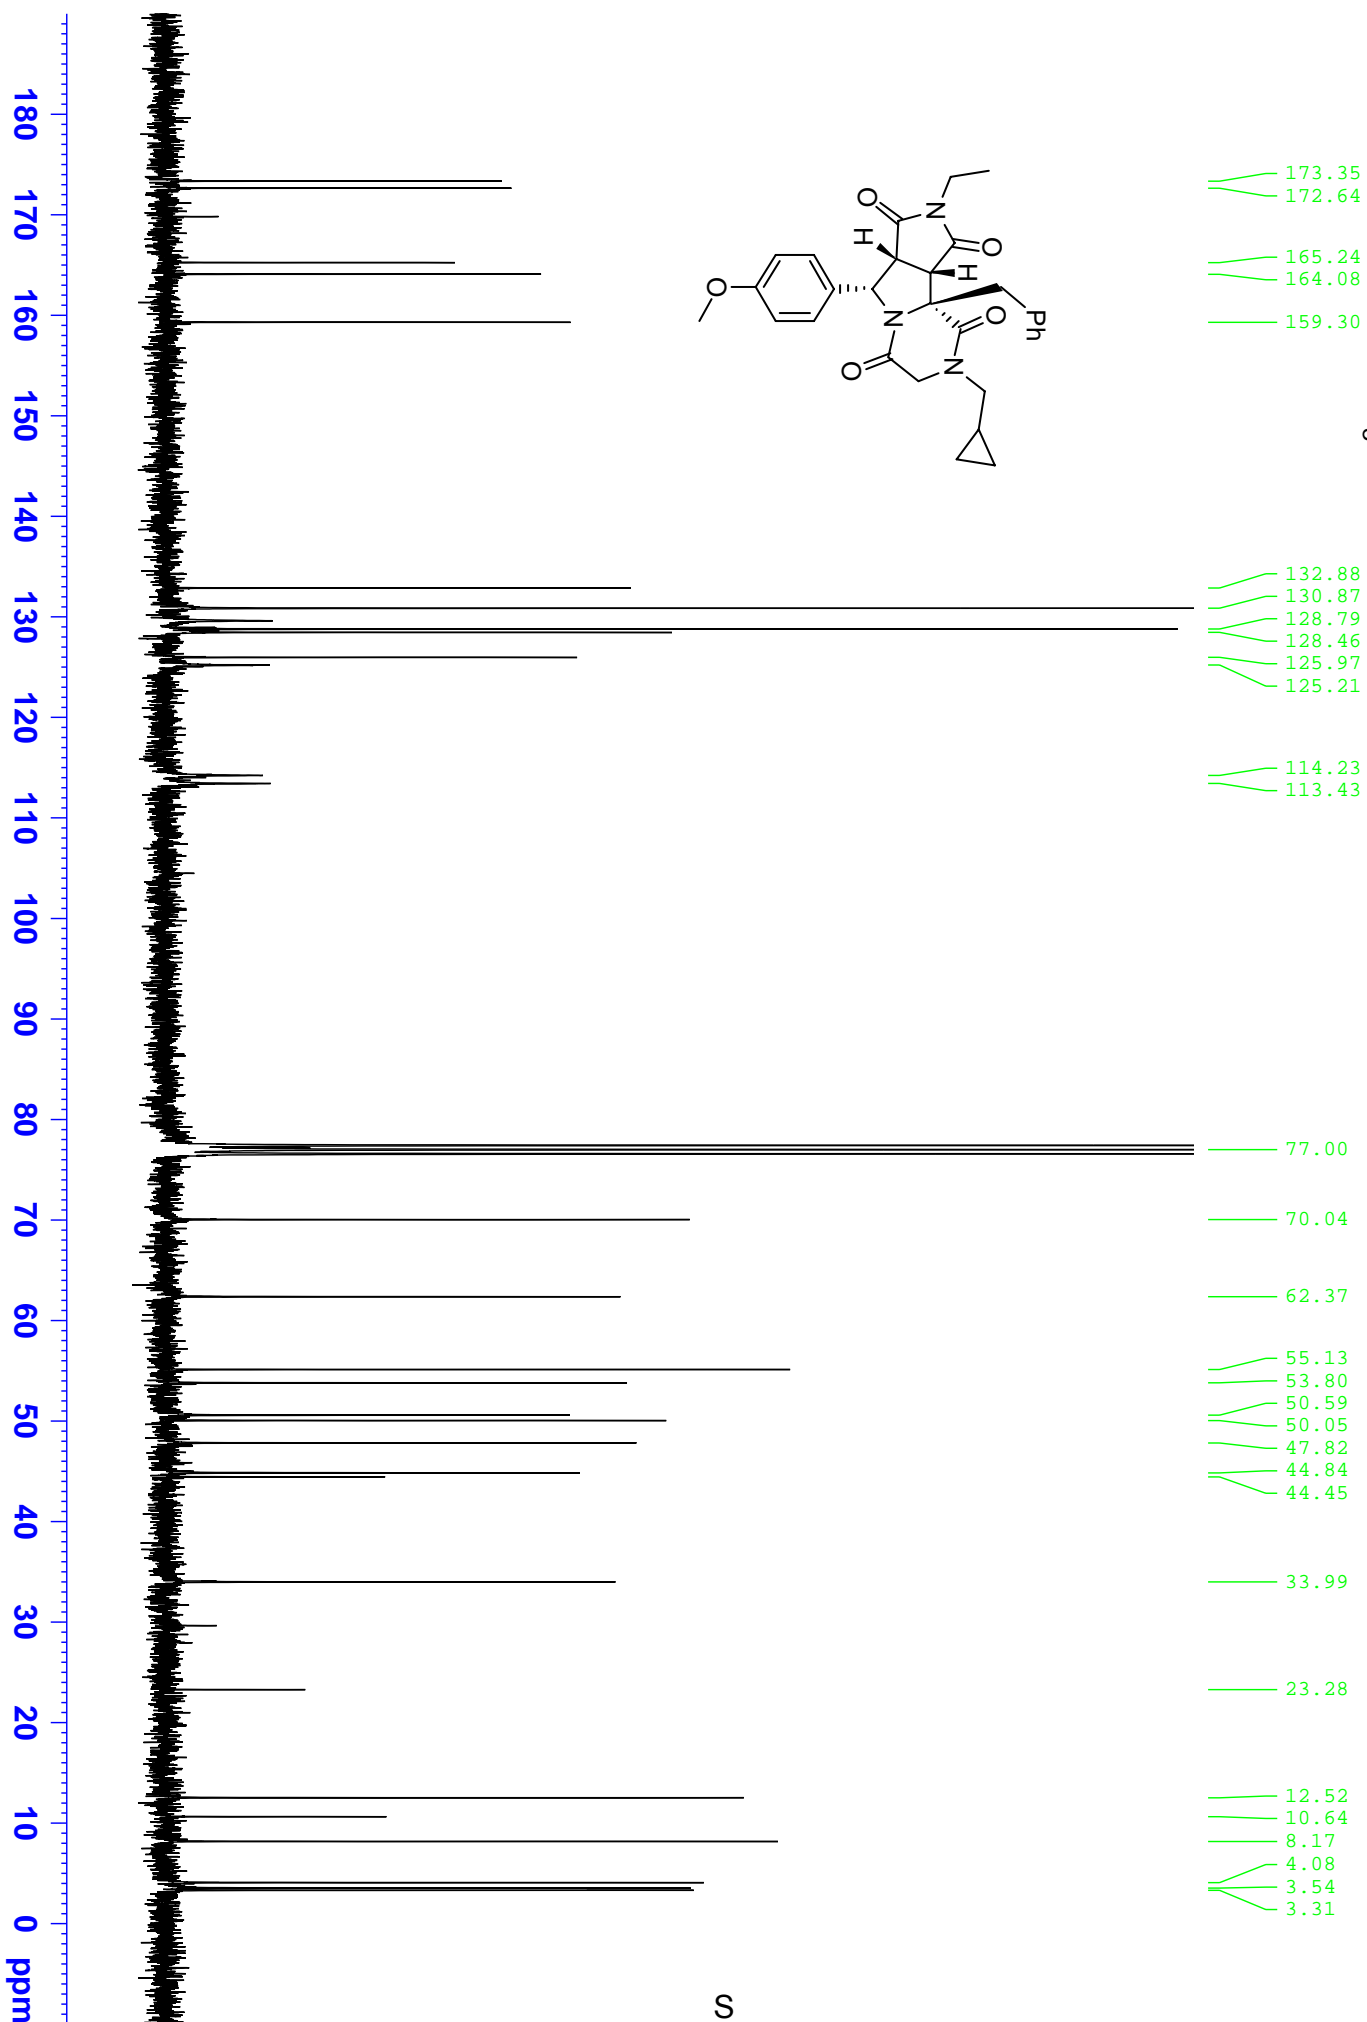

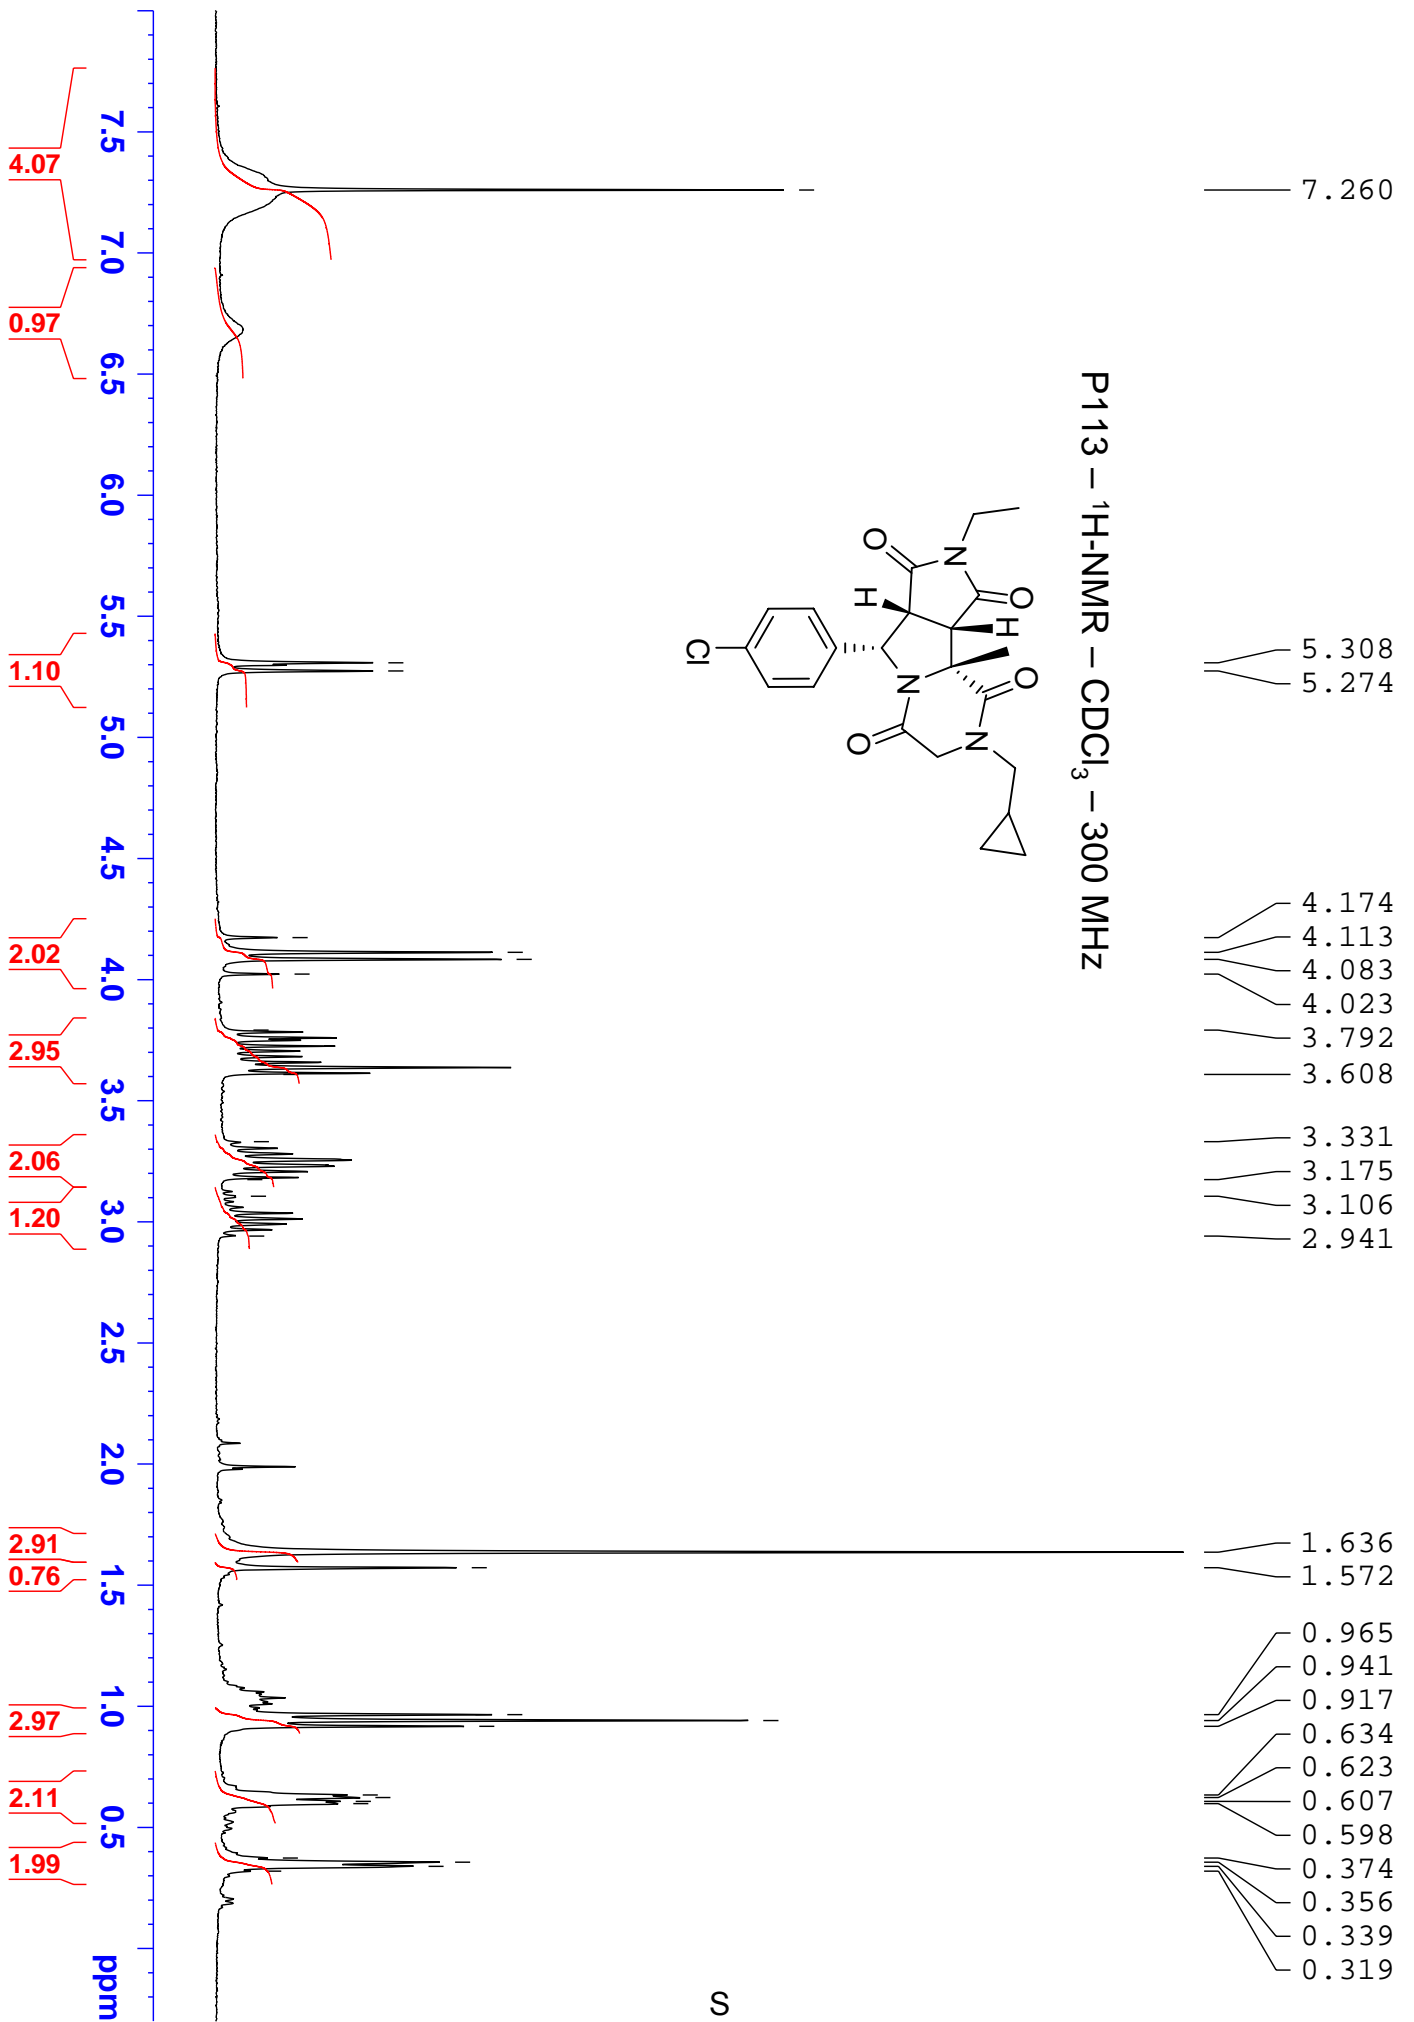



P113 –  $^{13}\text{C}$ -NMR –  $\text{CDCl}_3$  – 300 MHz

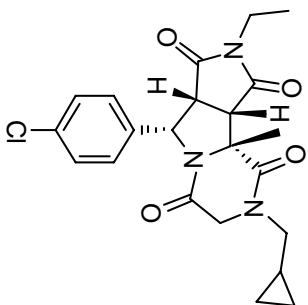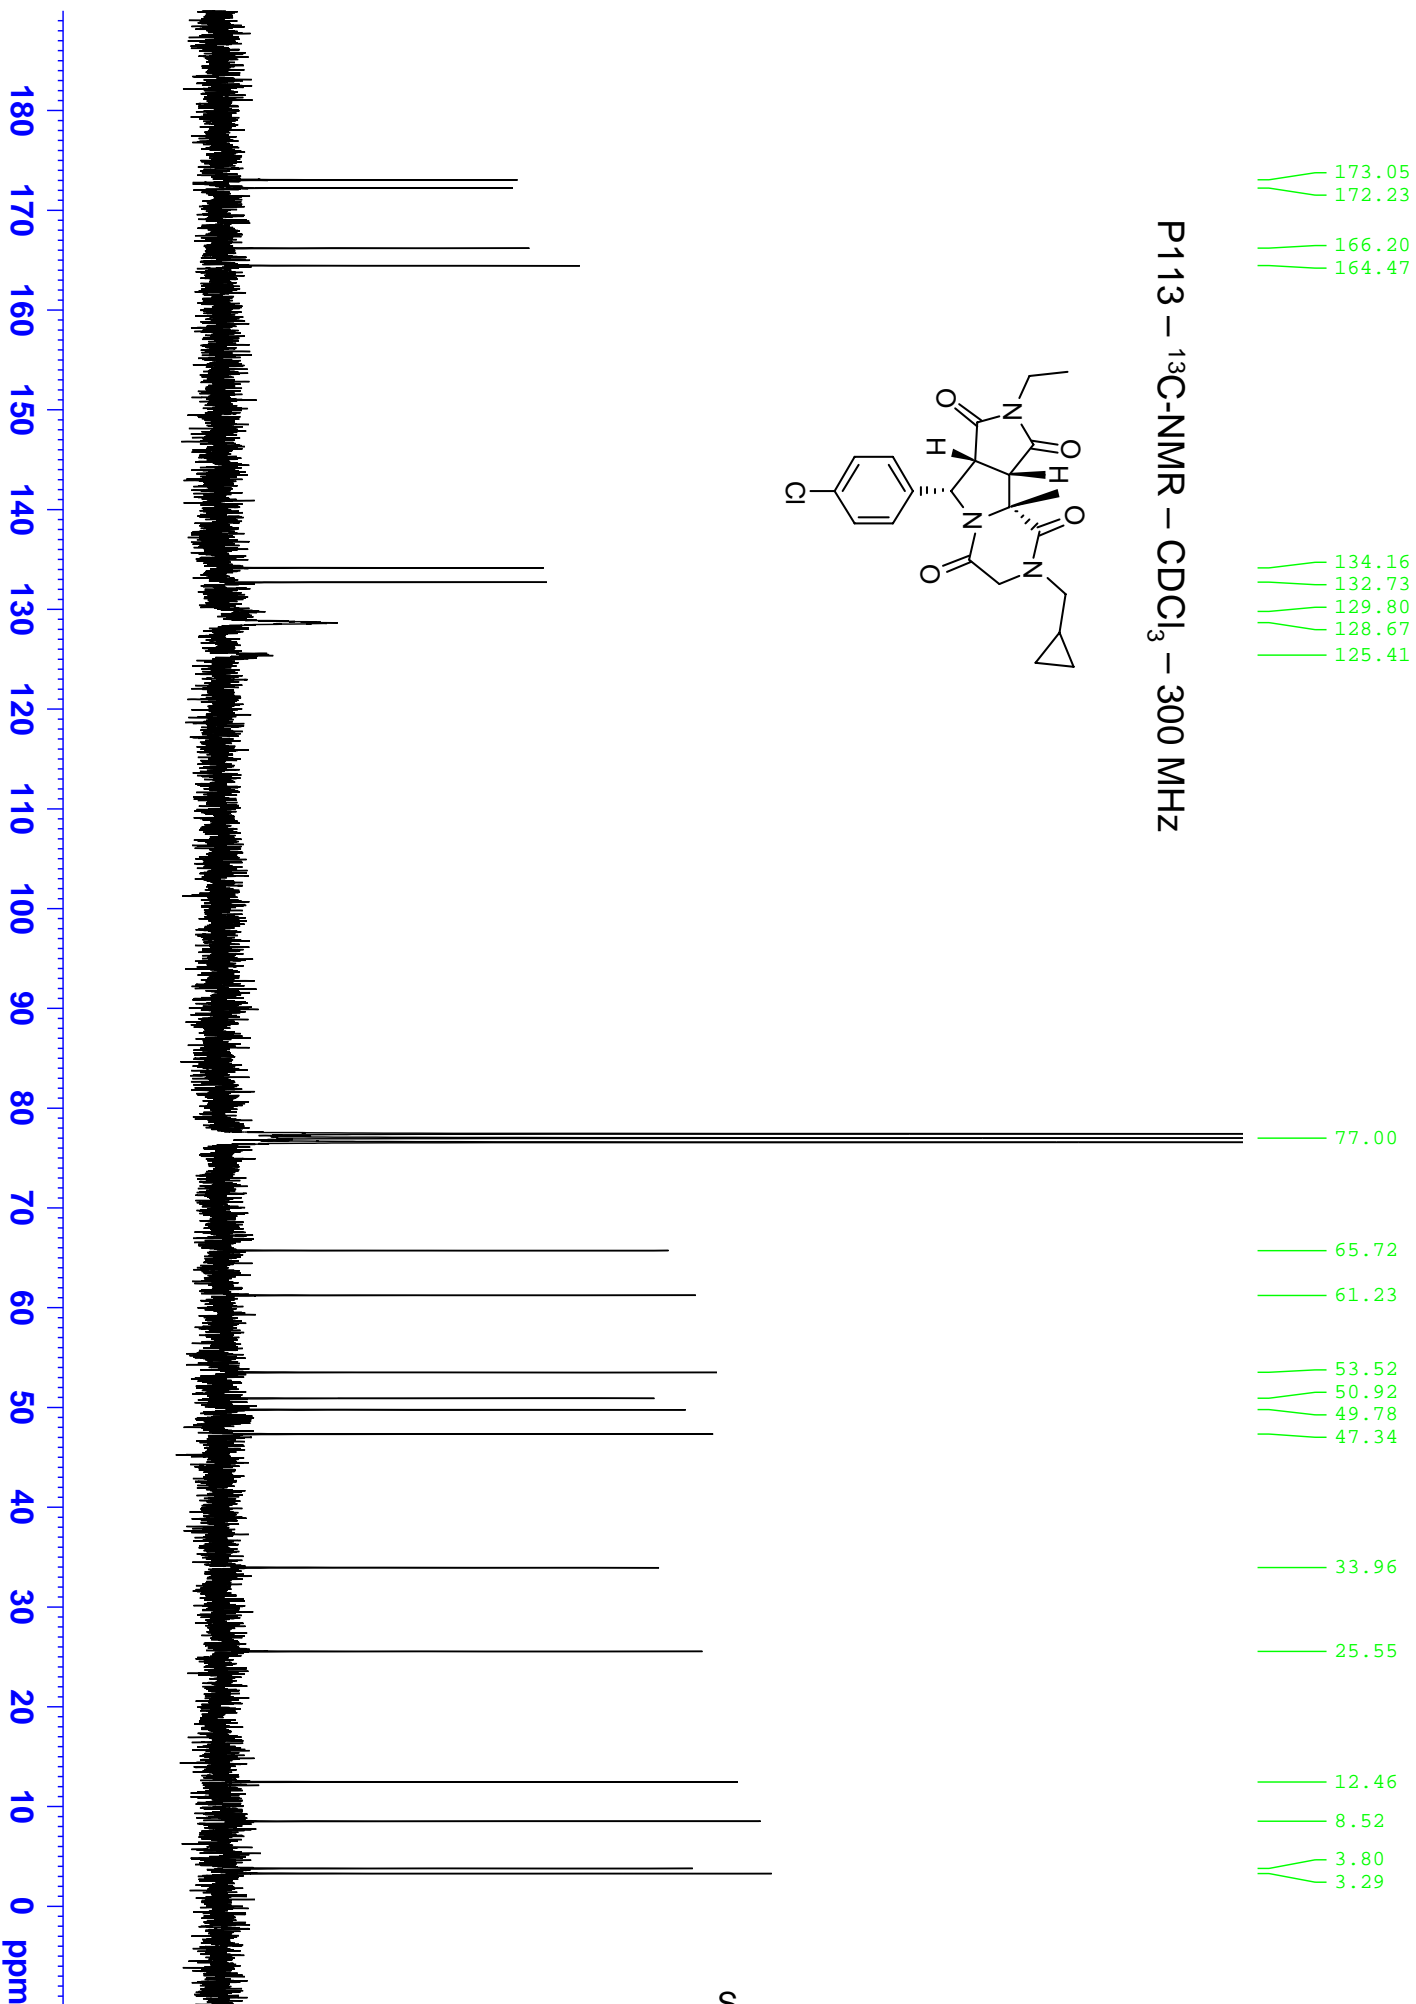

P114 - <sup>1</sup>H-NMR - CDCl<sub>3</sub> - 300 MHz

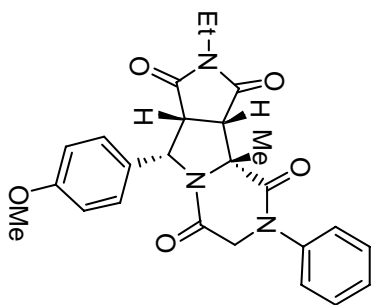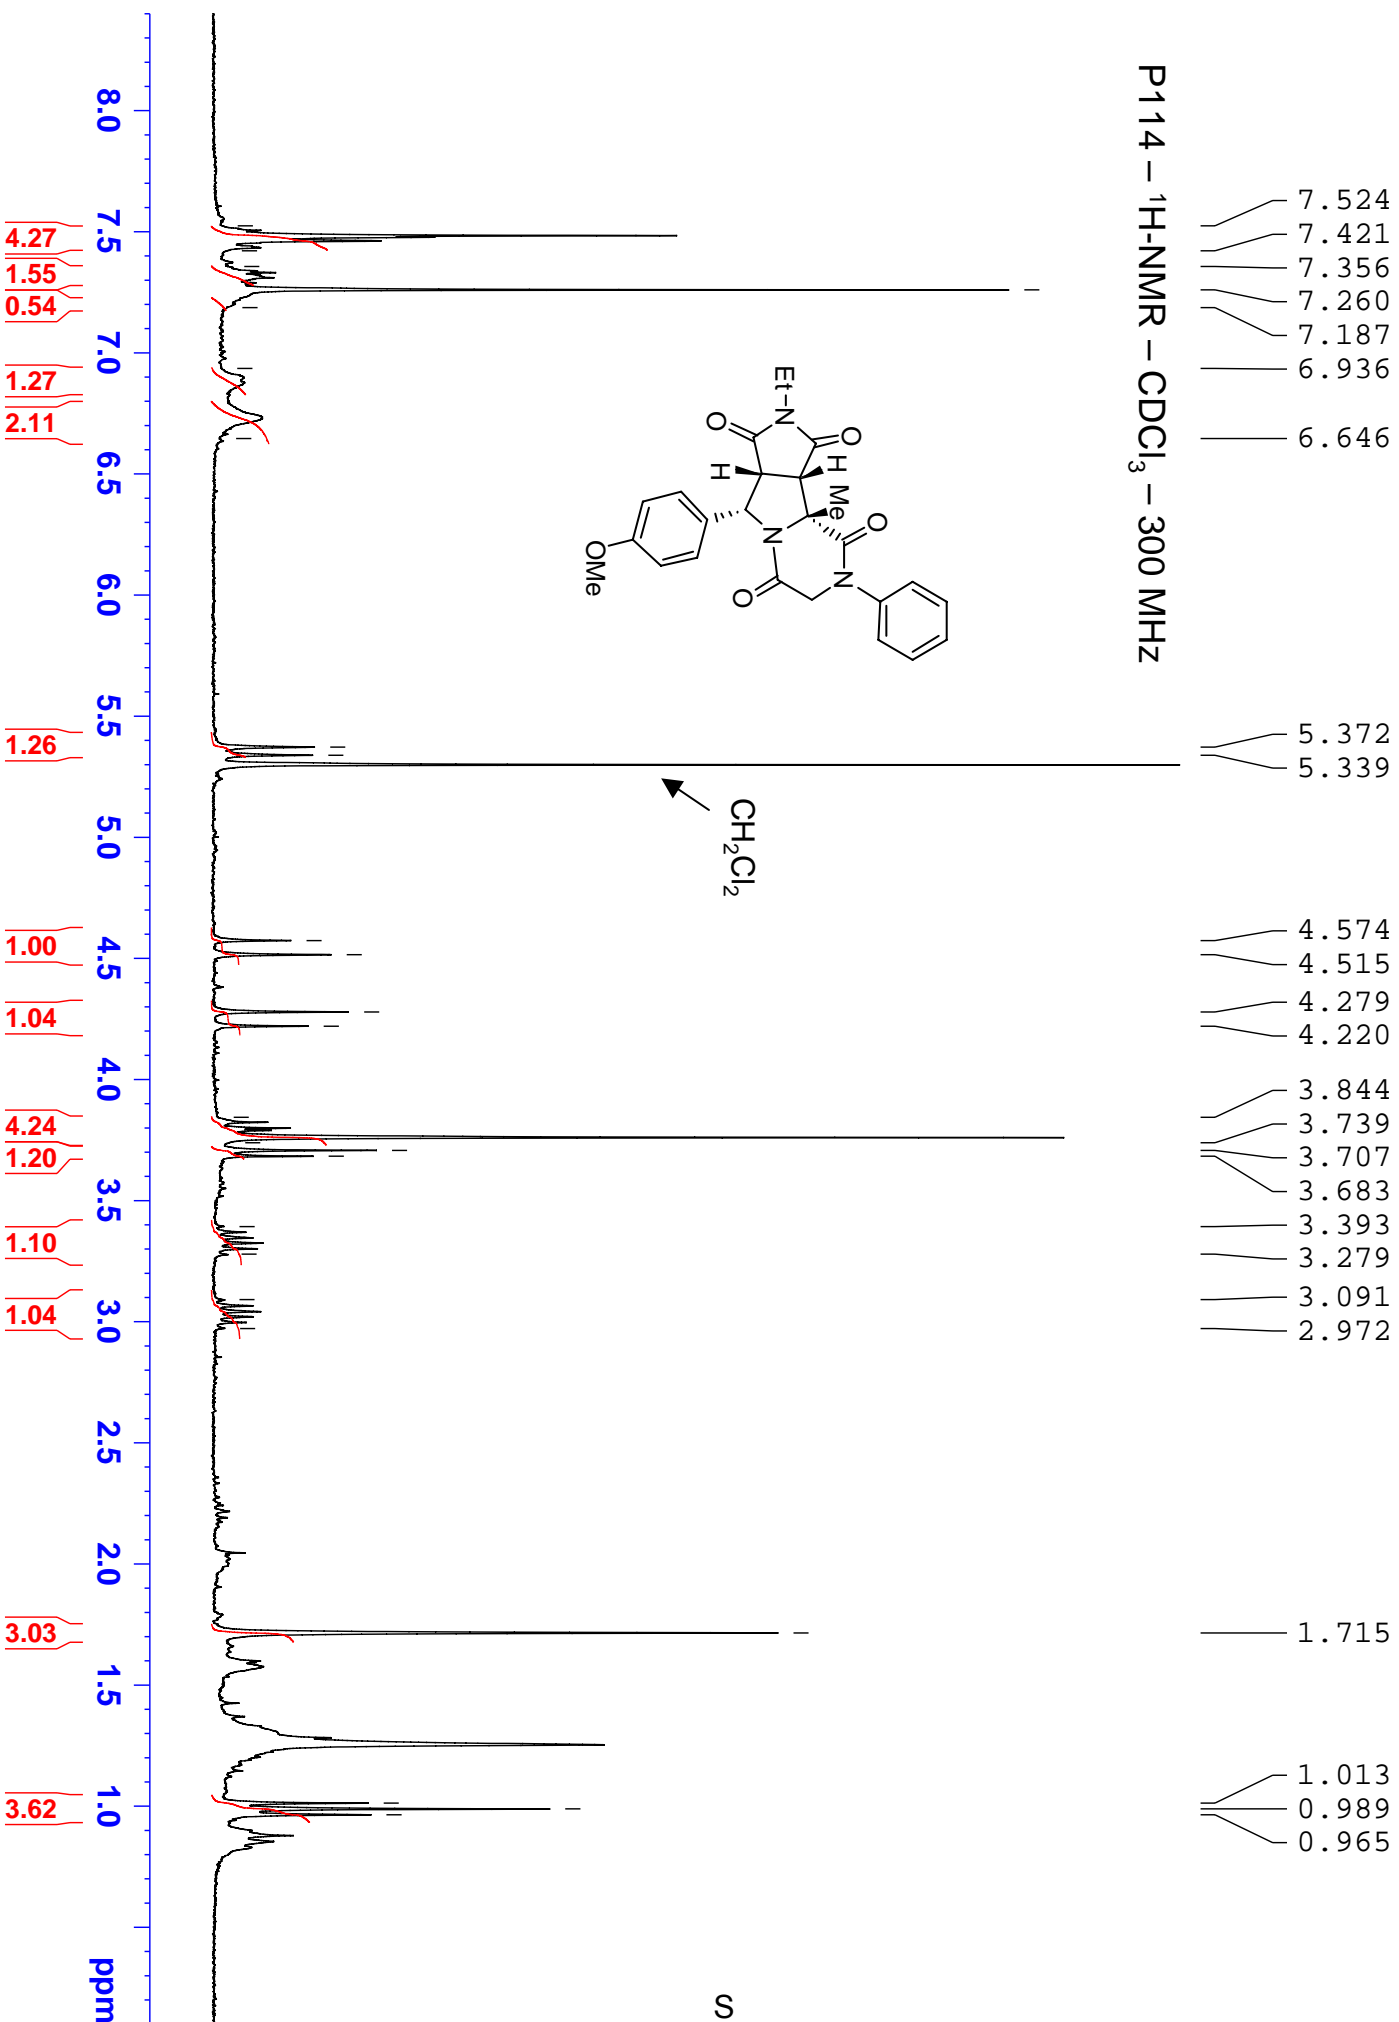



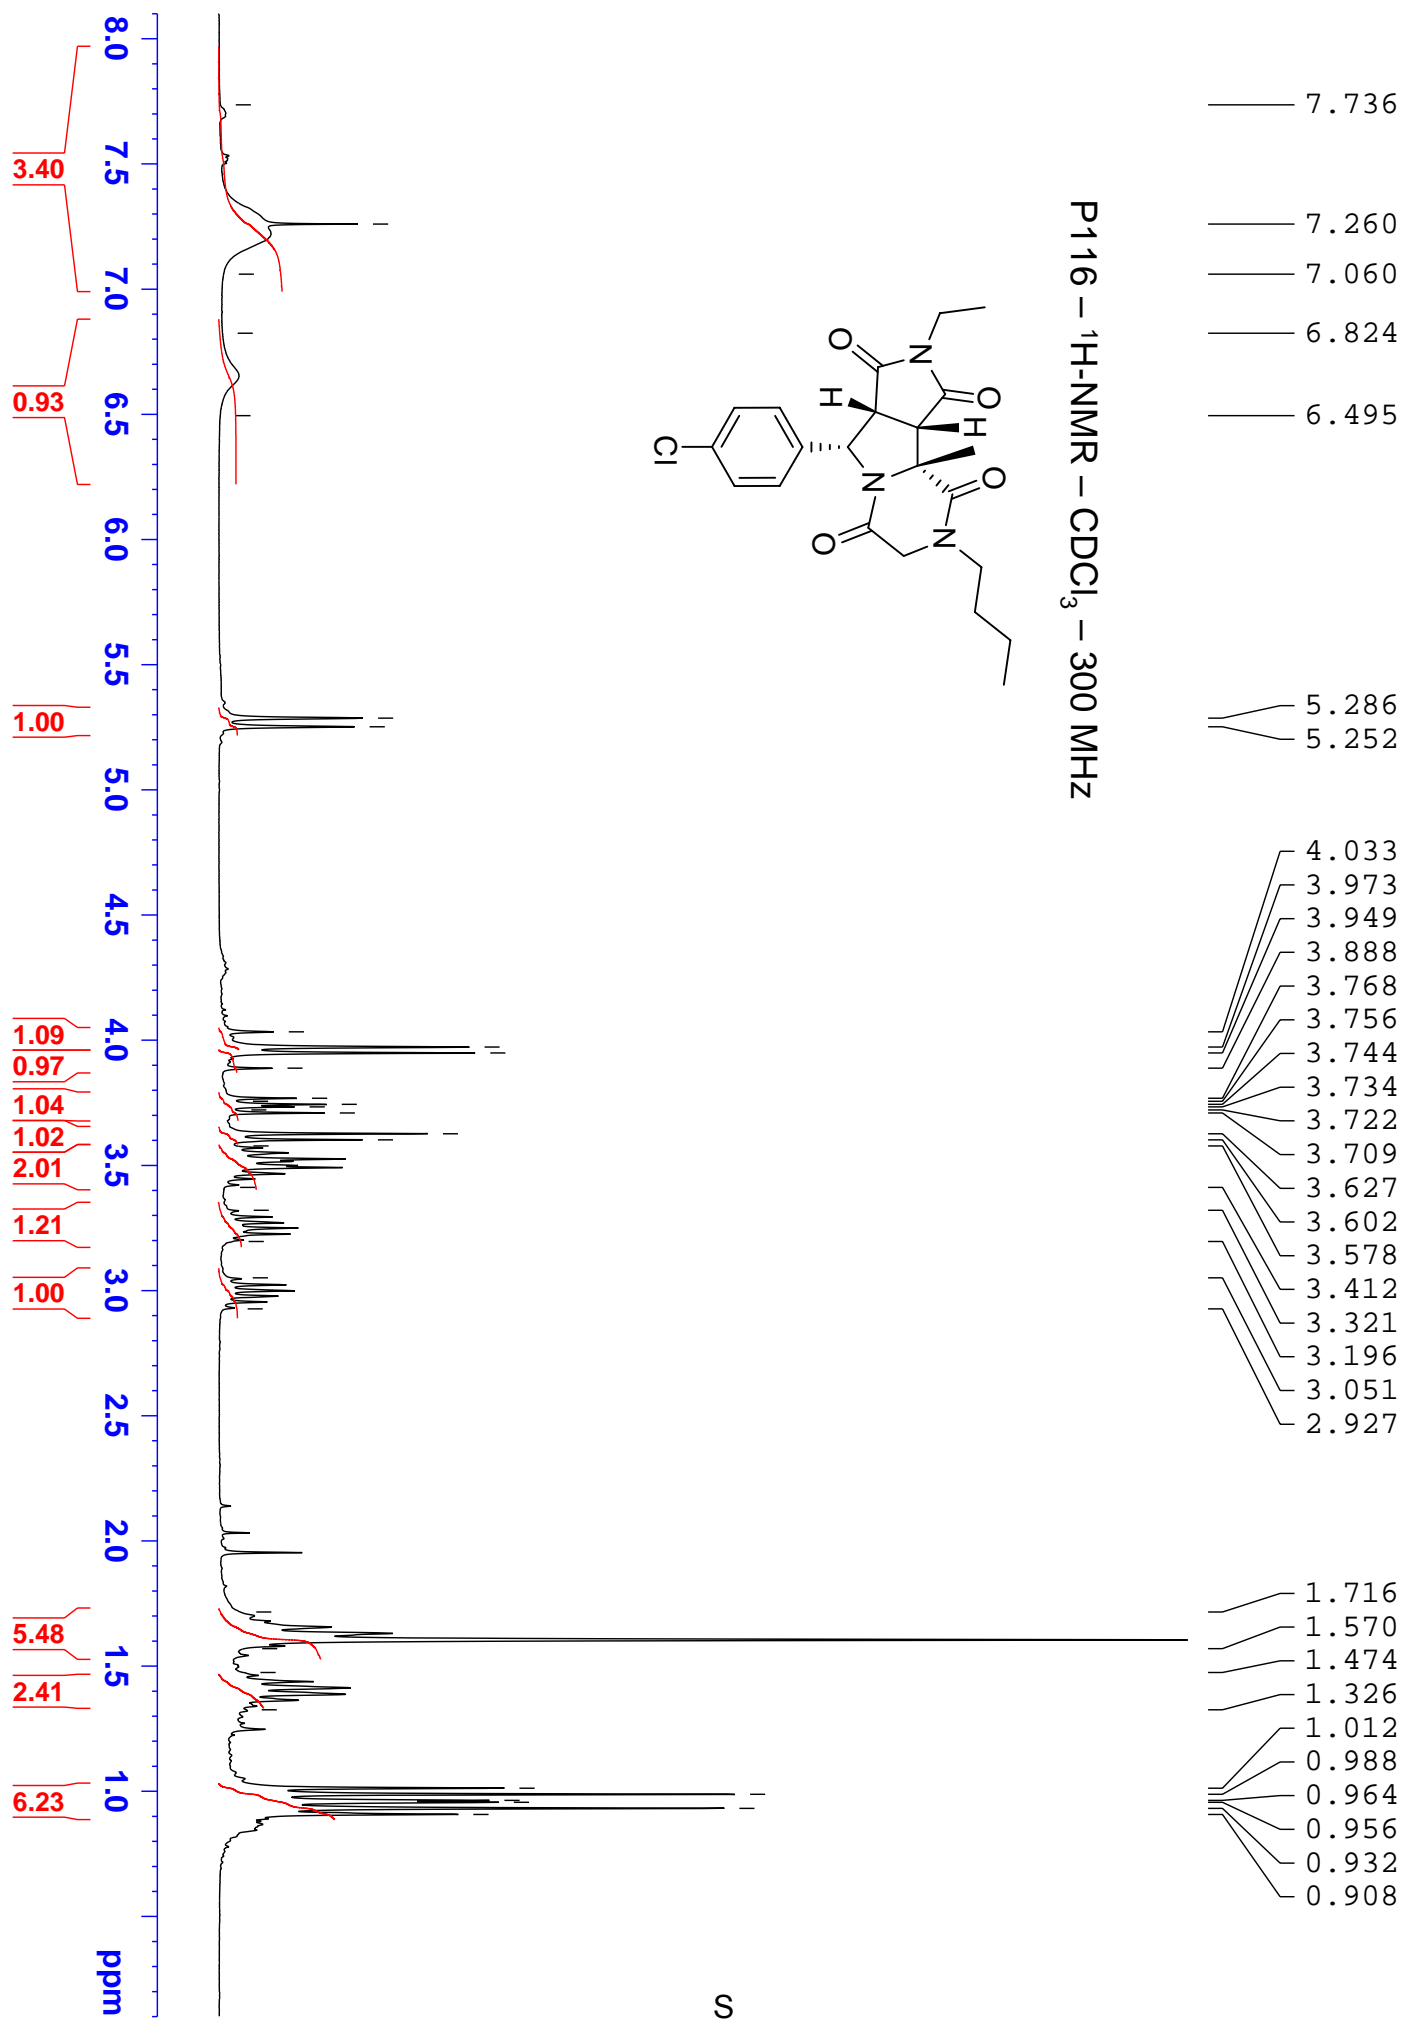

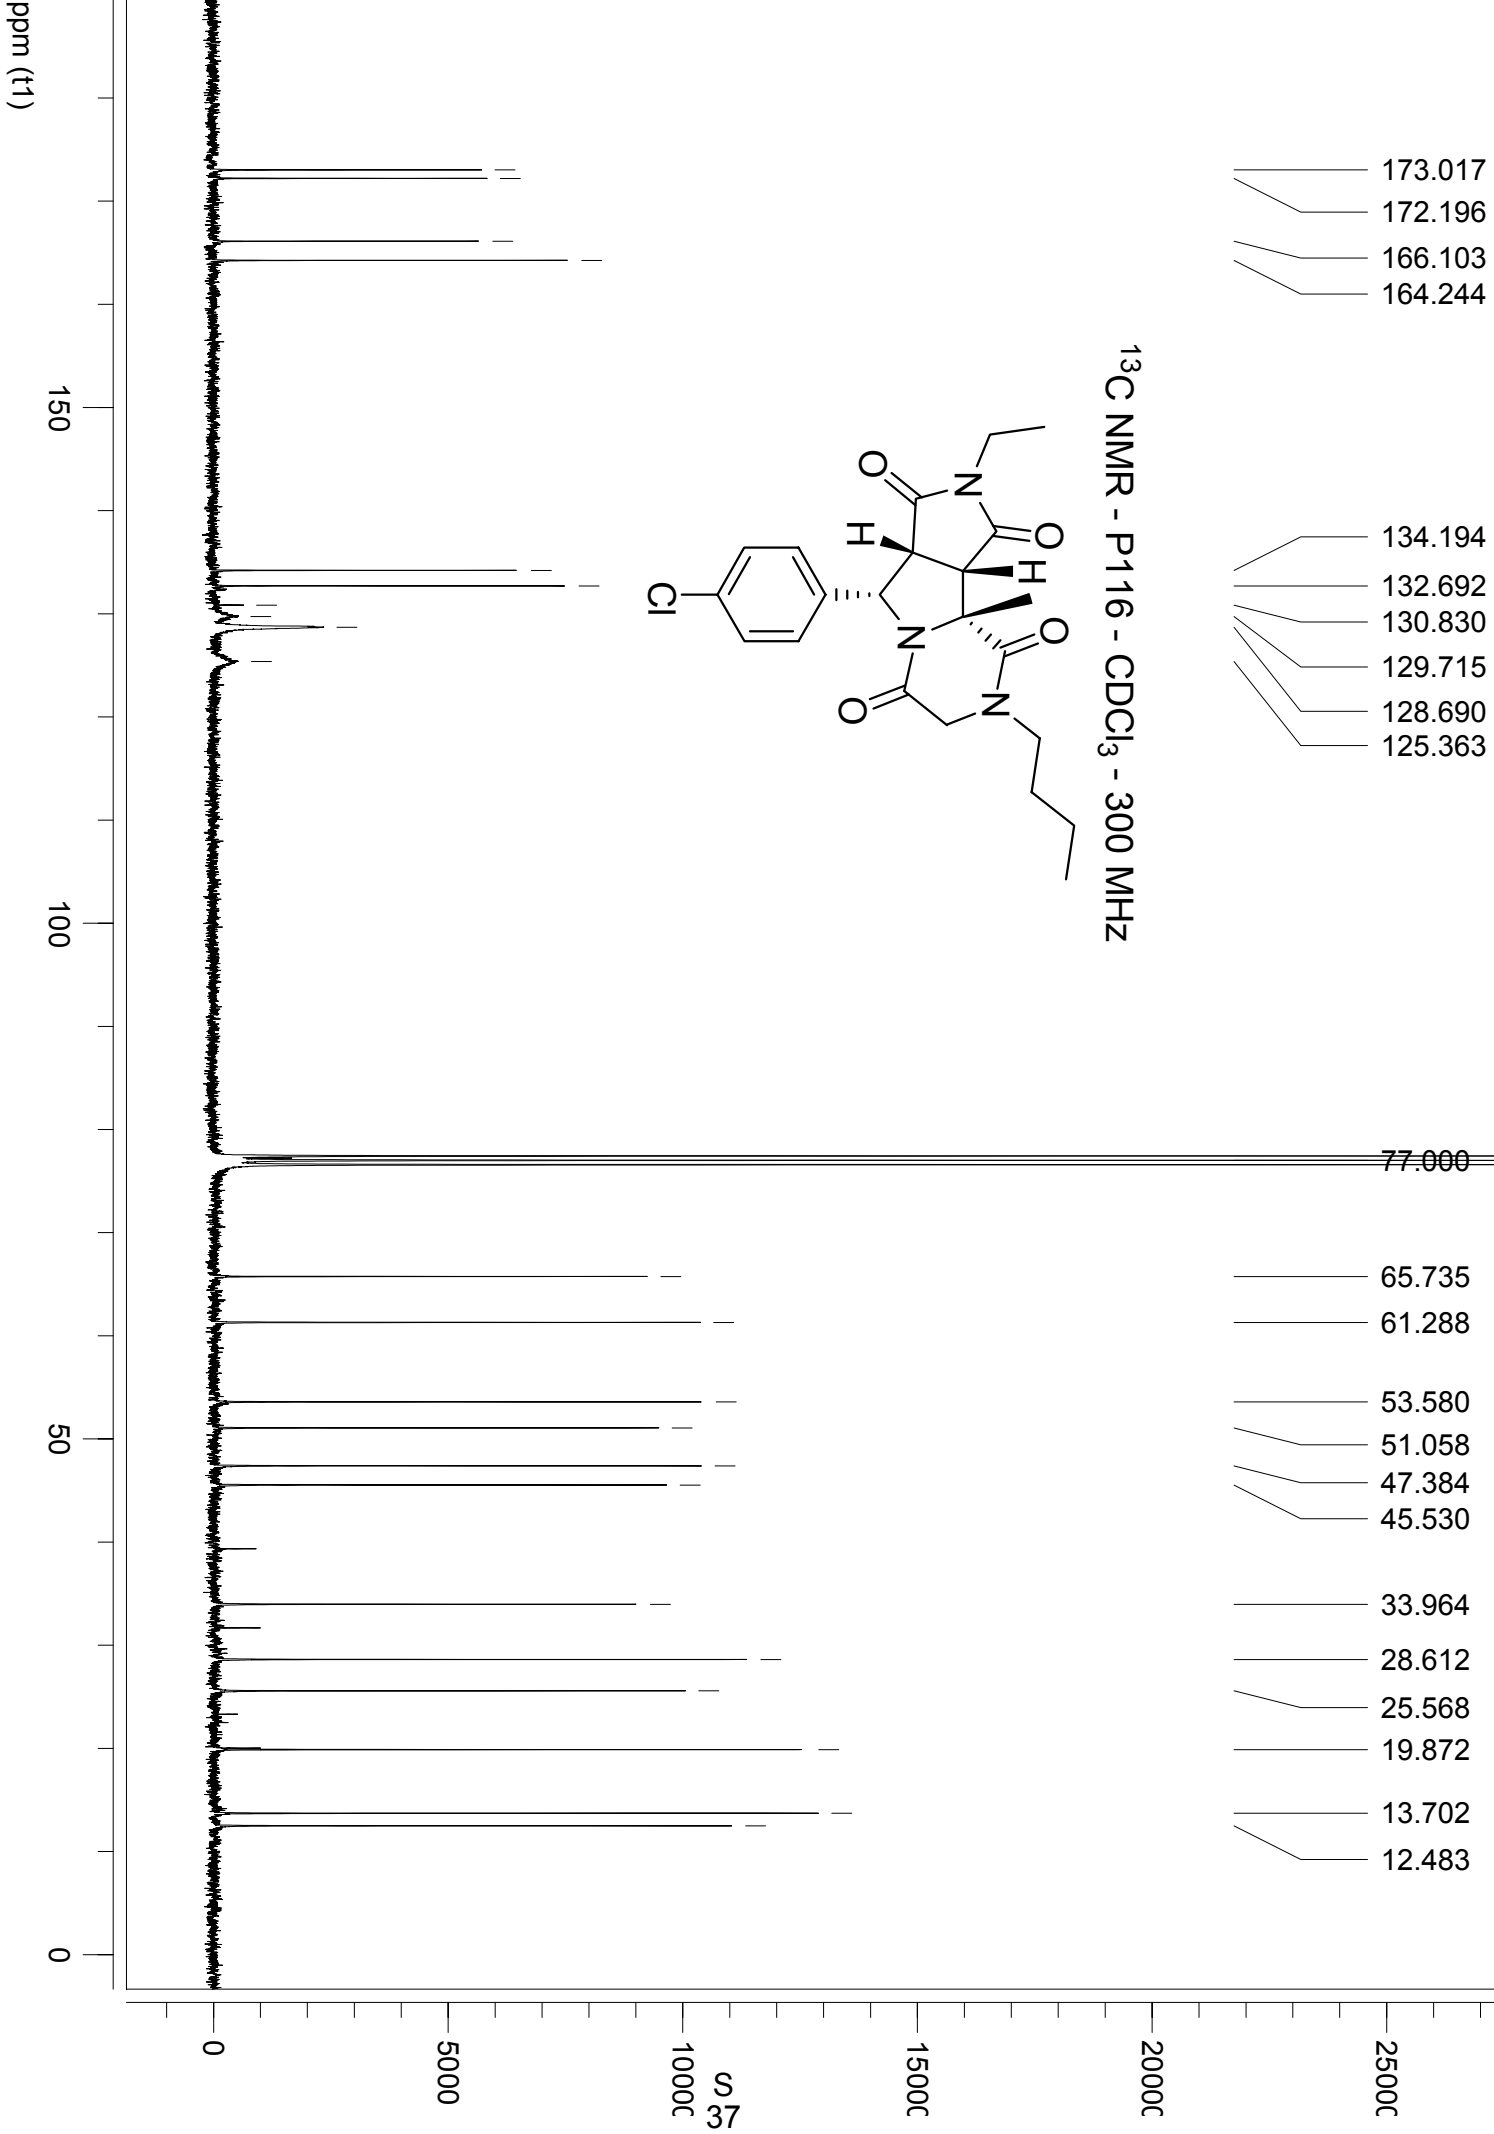

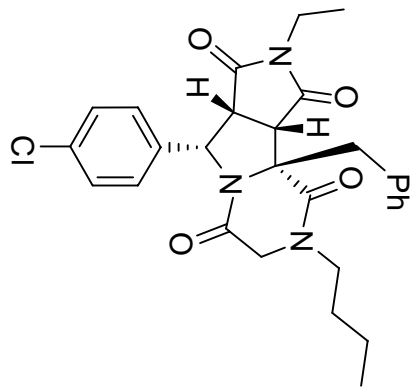

P117 - <sup>1</sup>H-NMR - CDCl<sub>3</sub> - 300 MHz

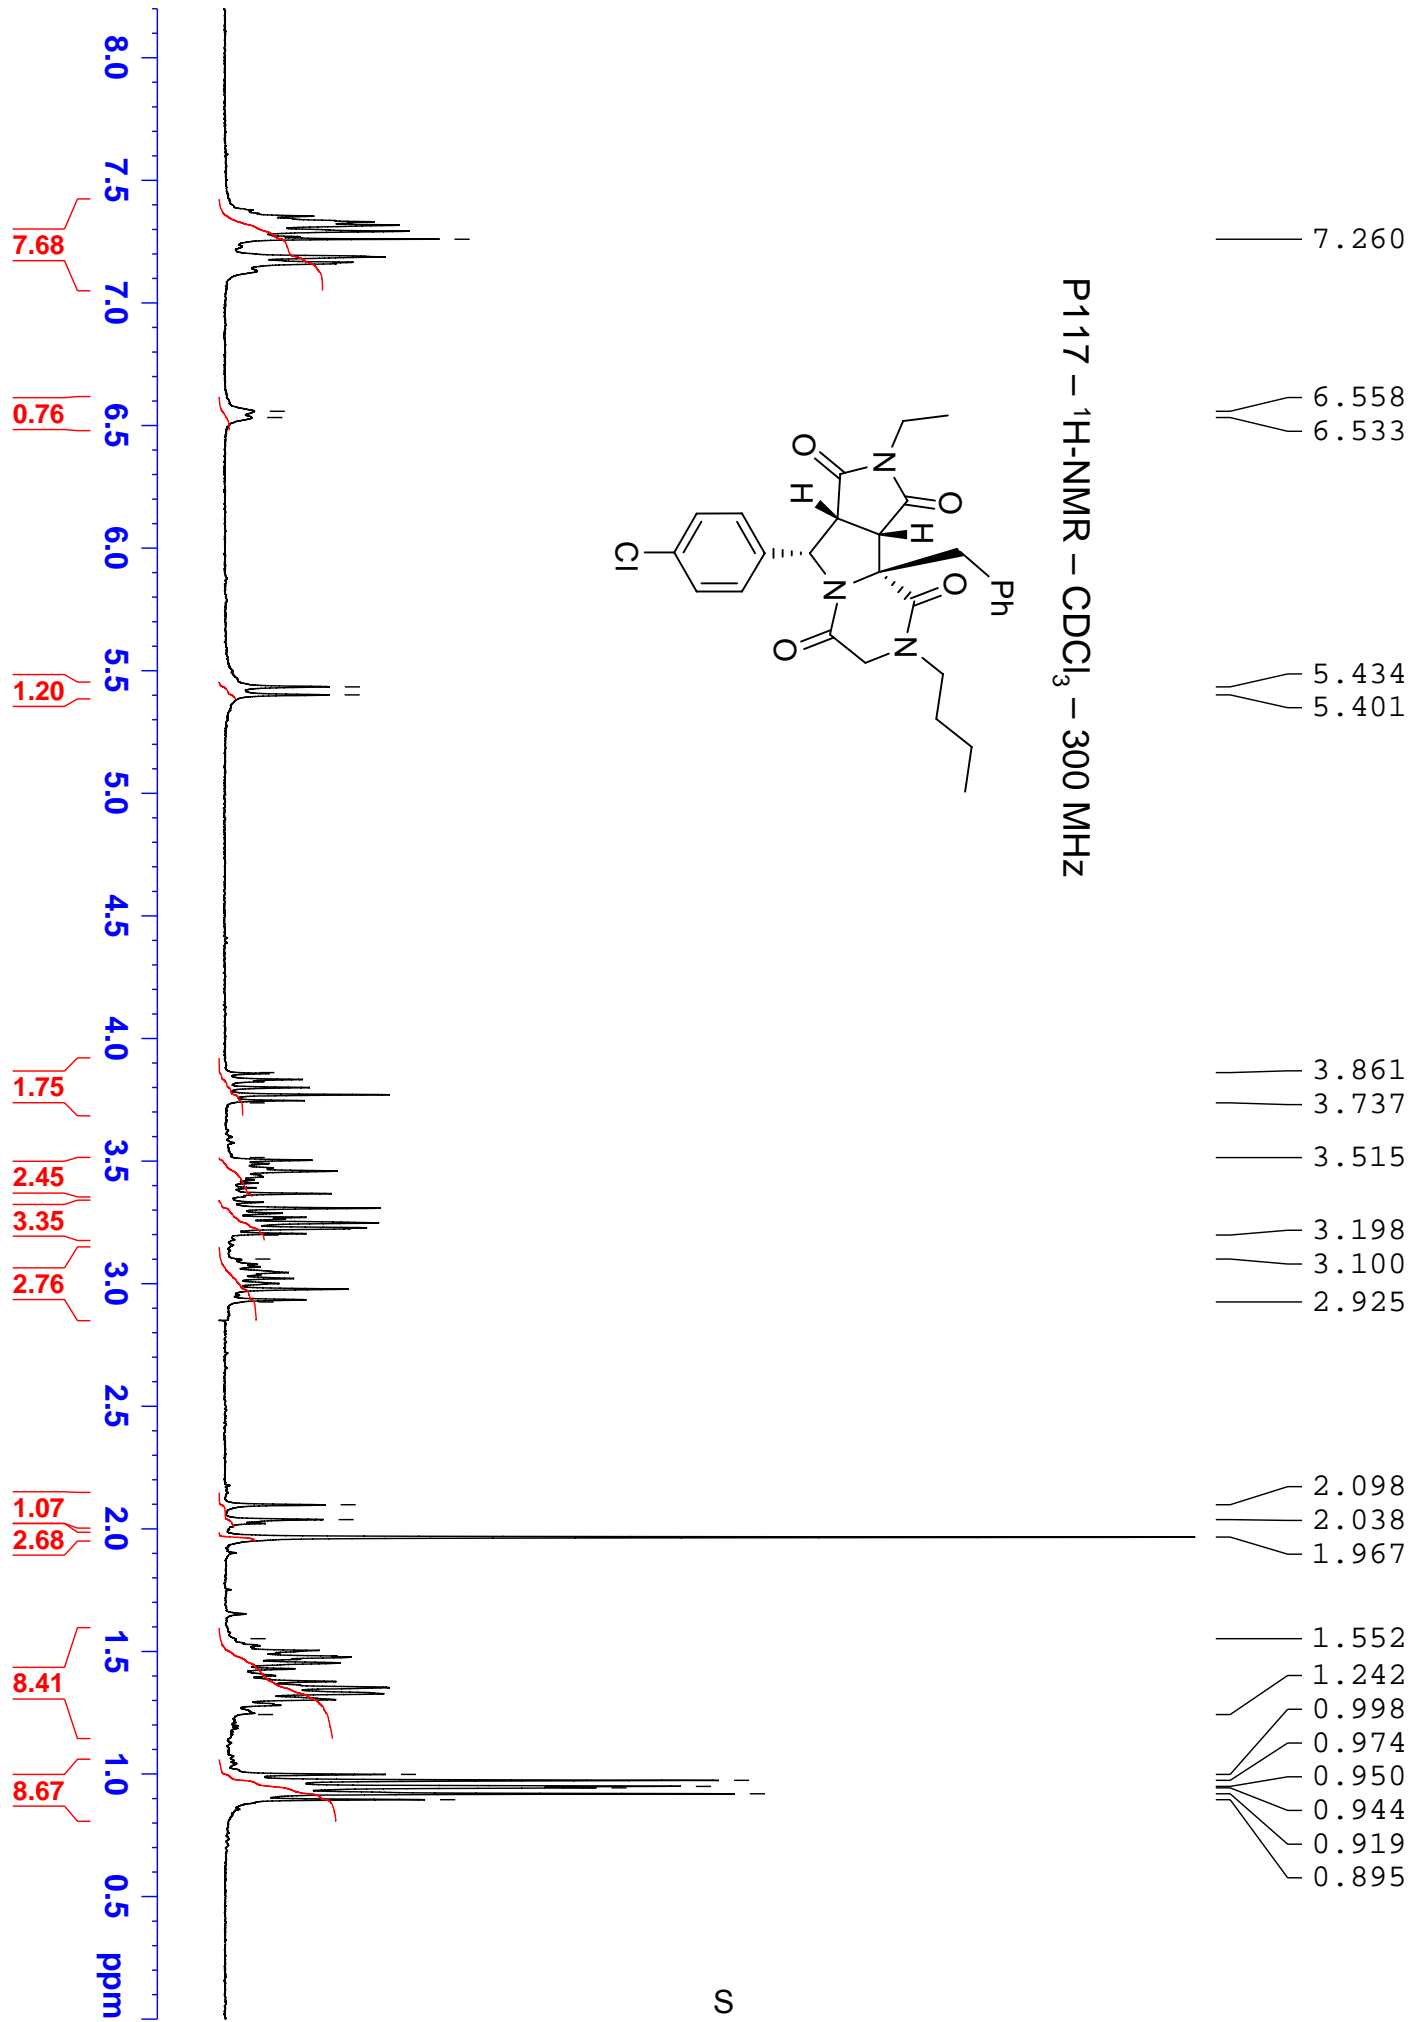

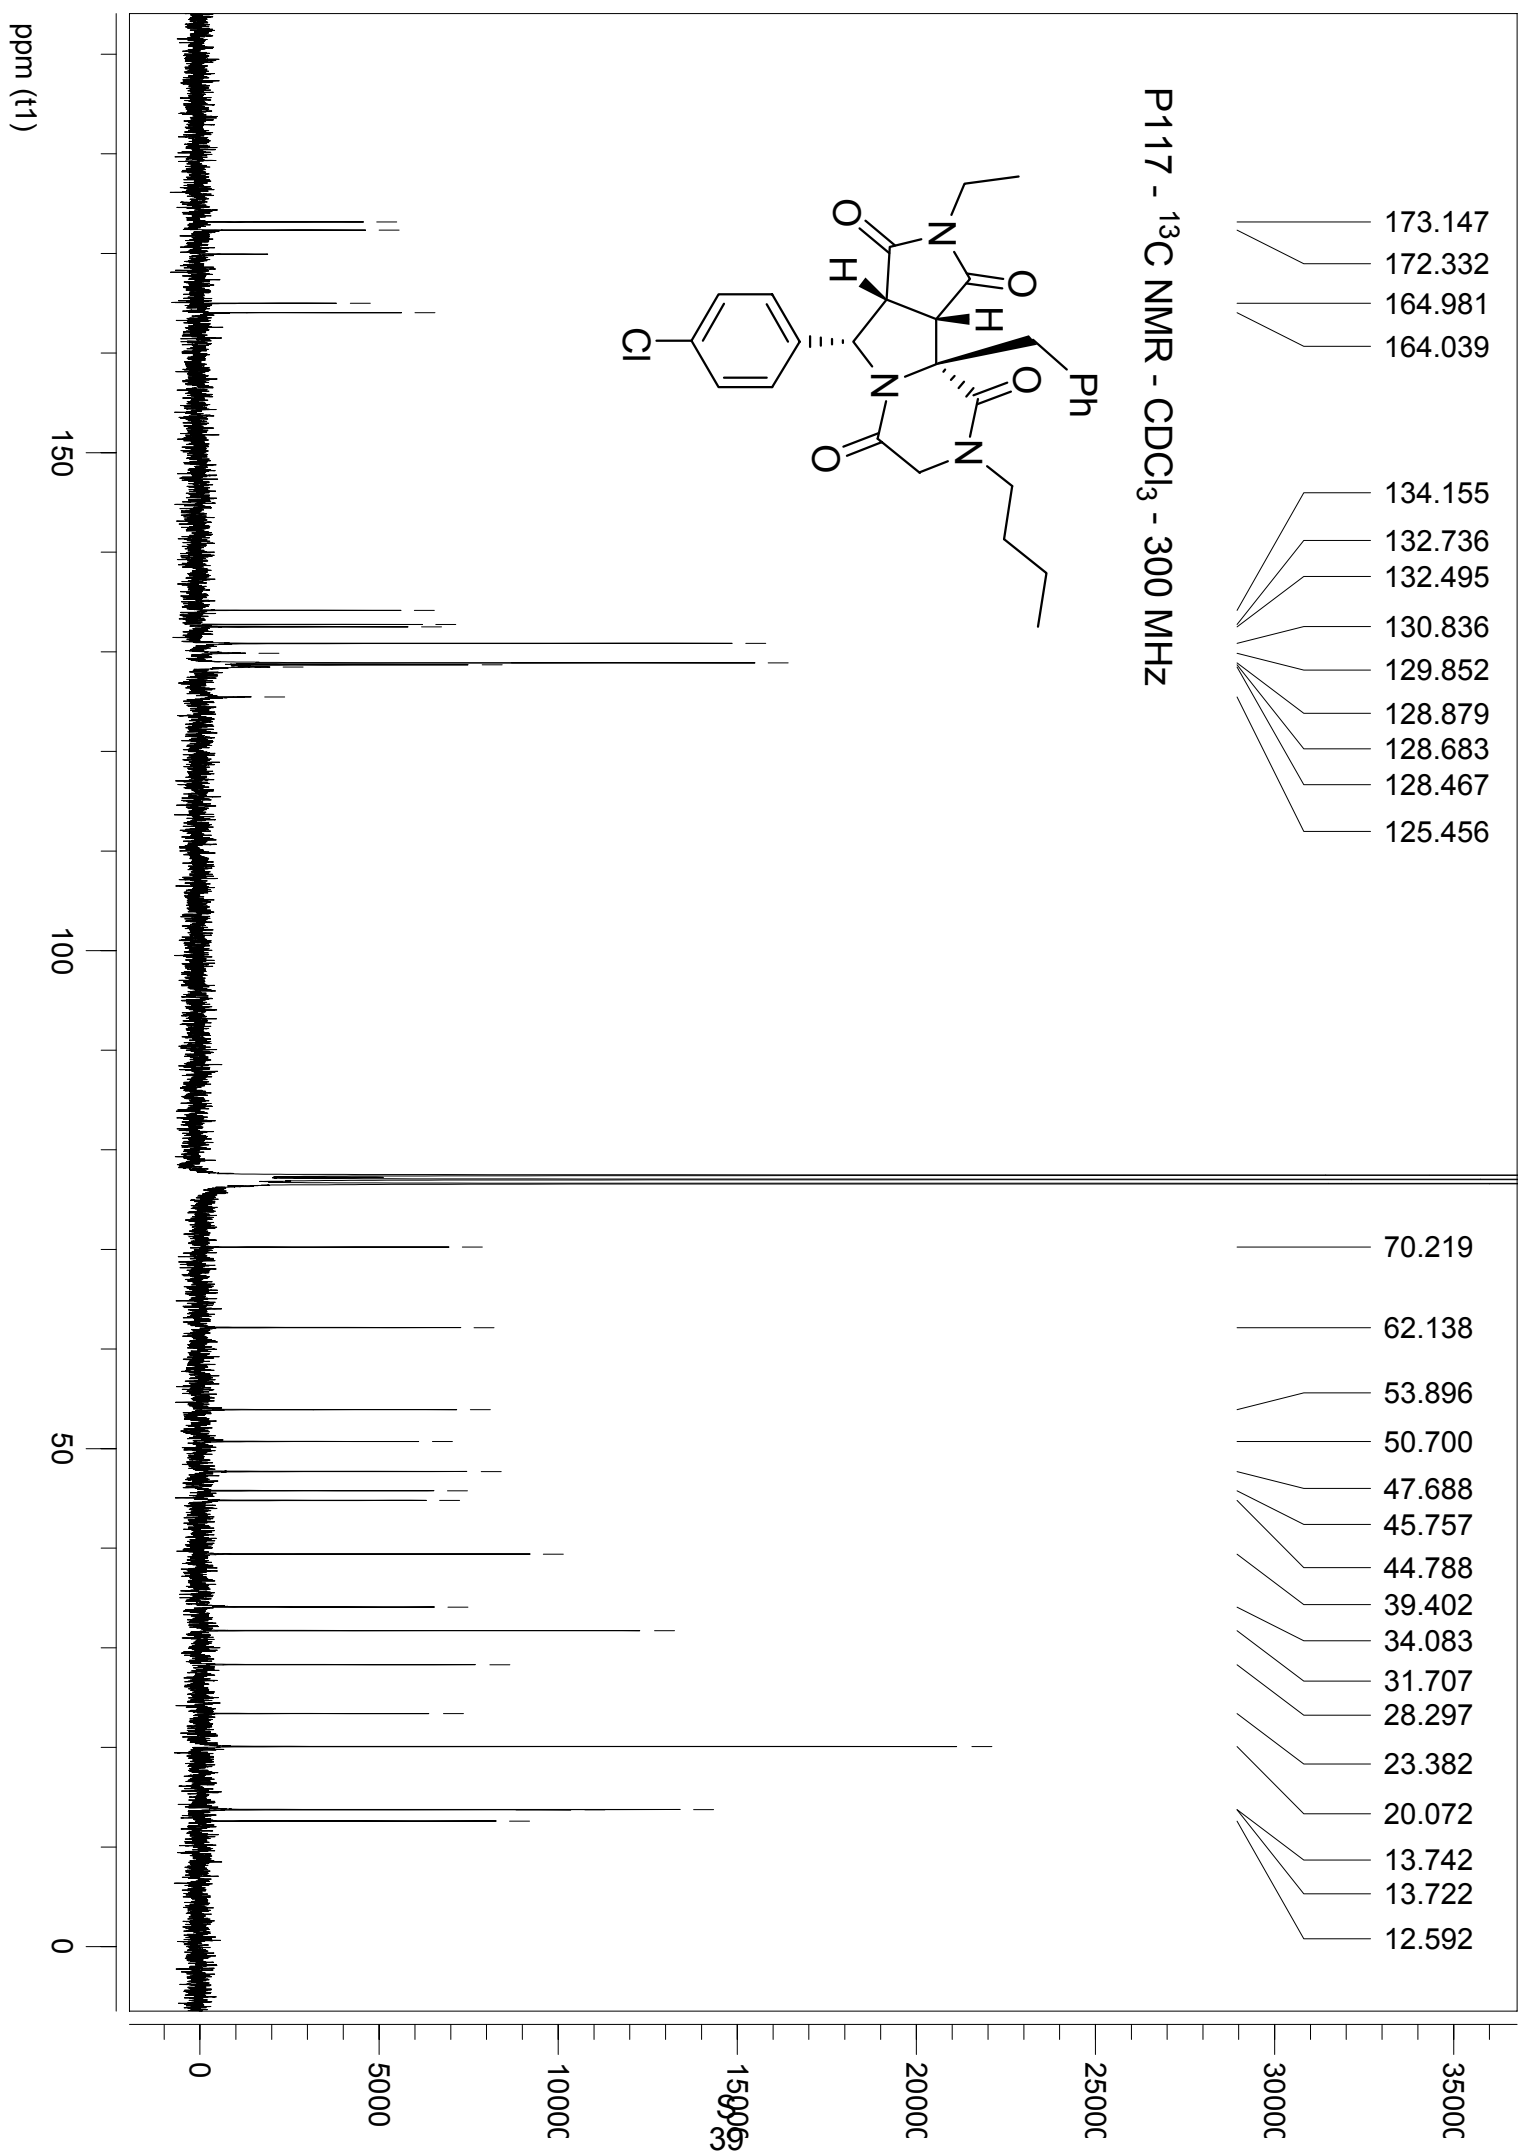

P122 - <sup>1</sup>H-NMR - CDCl<sub>3</sub> - 300 MHz

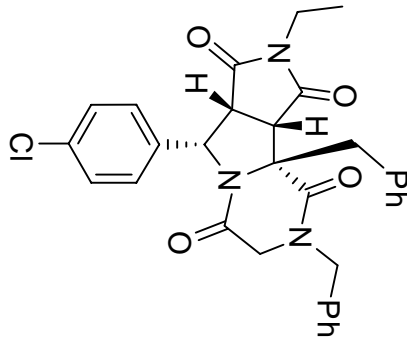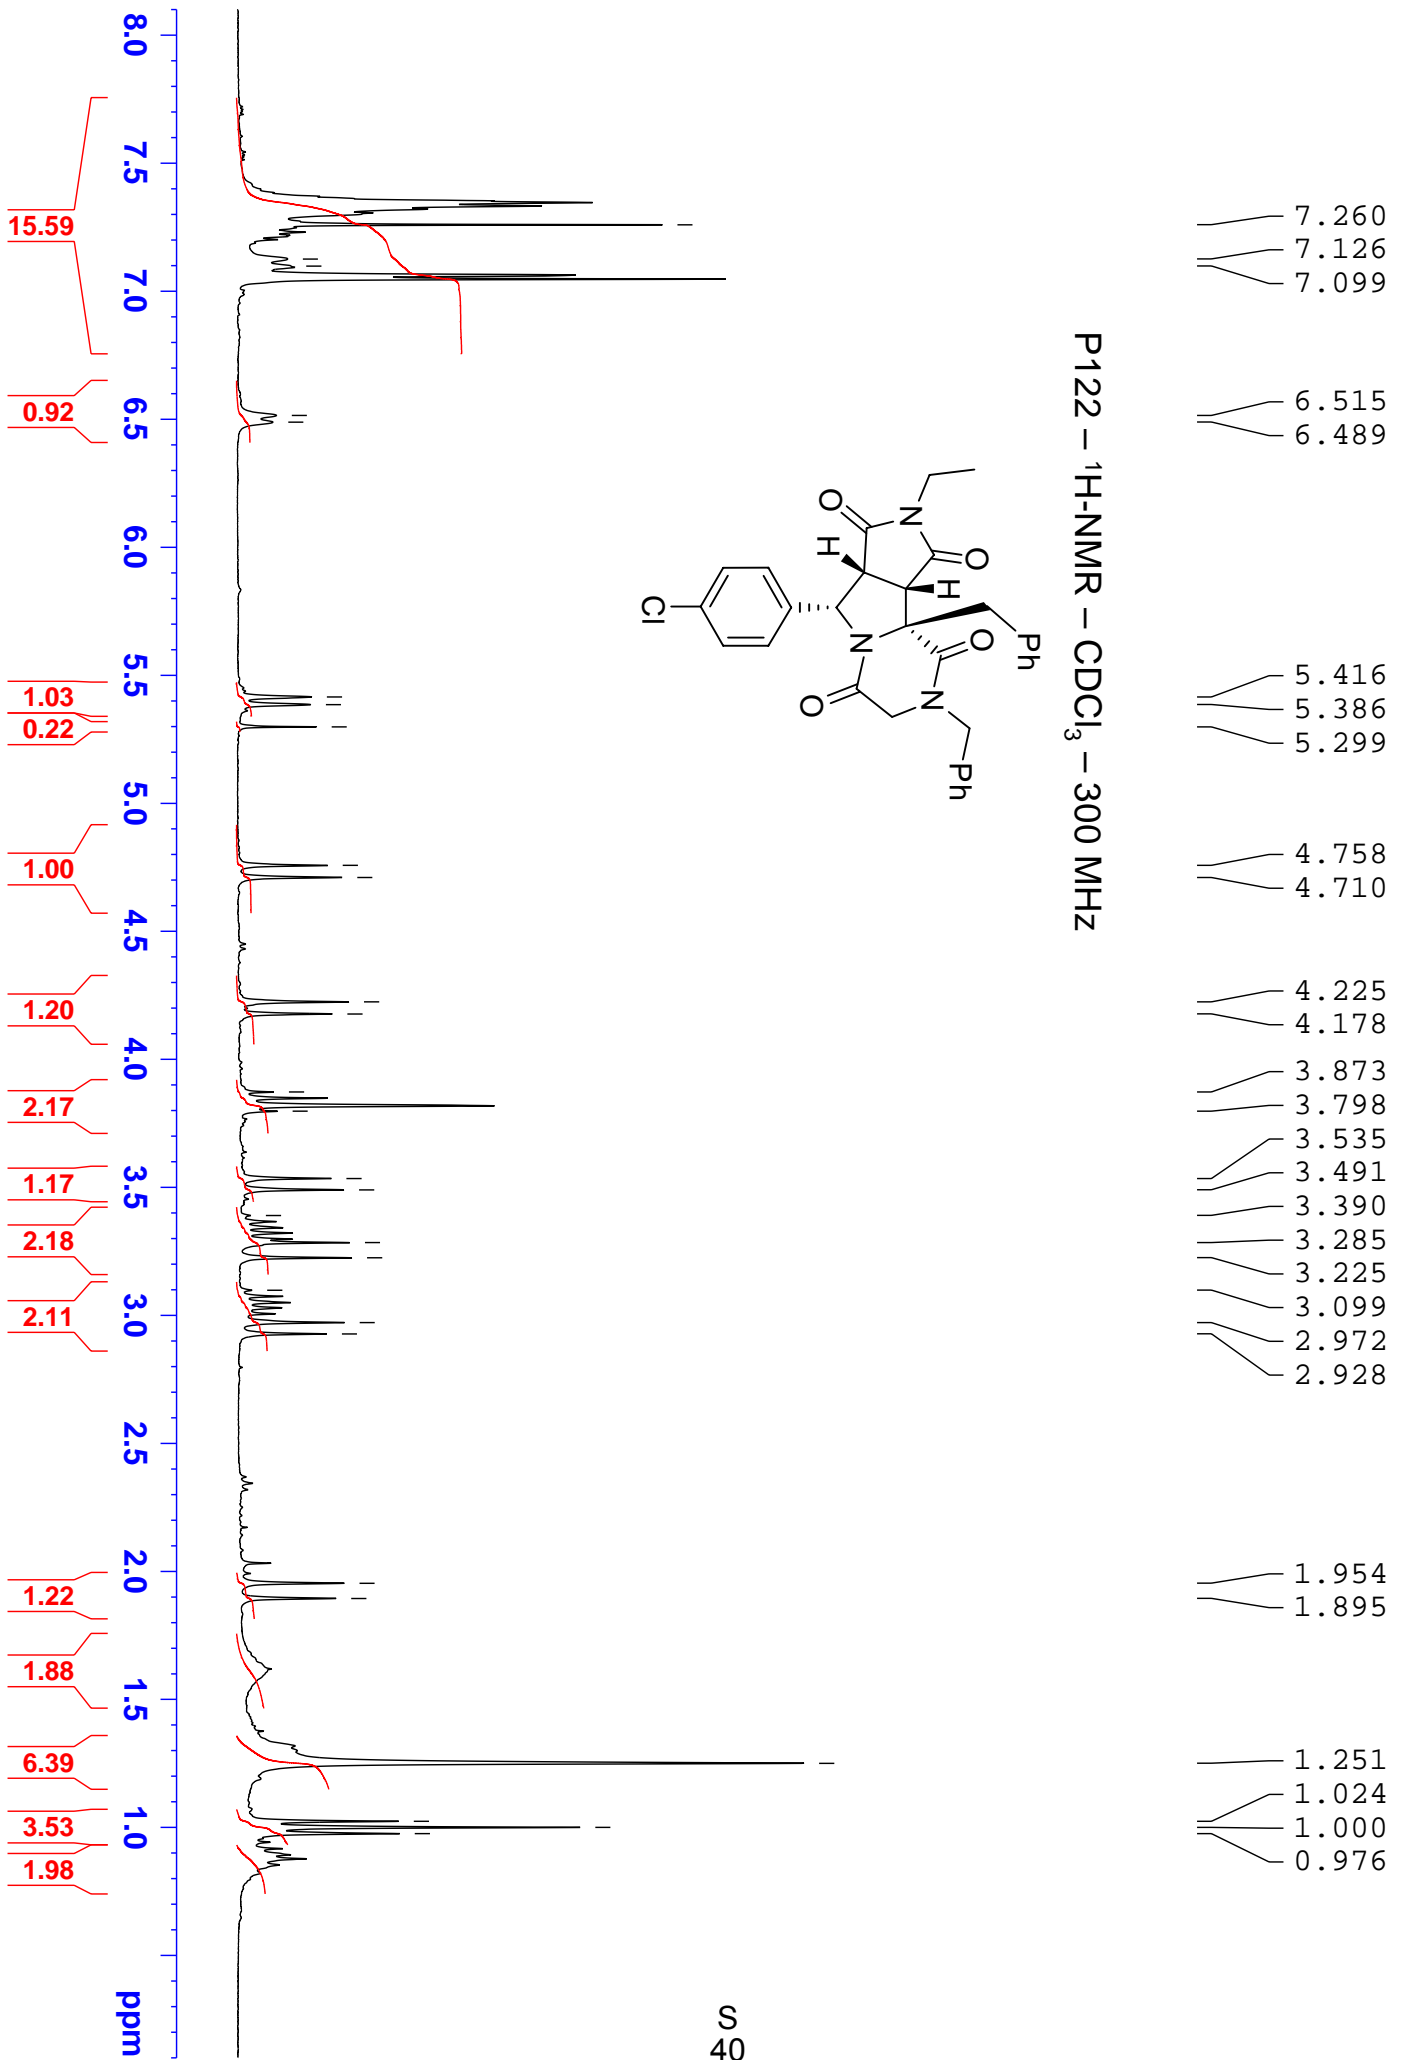



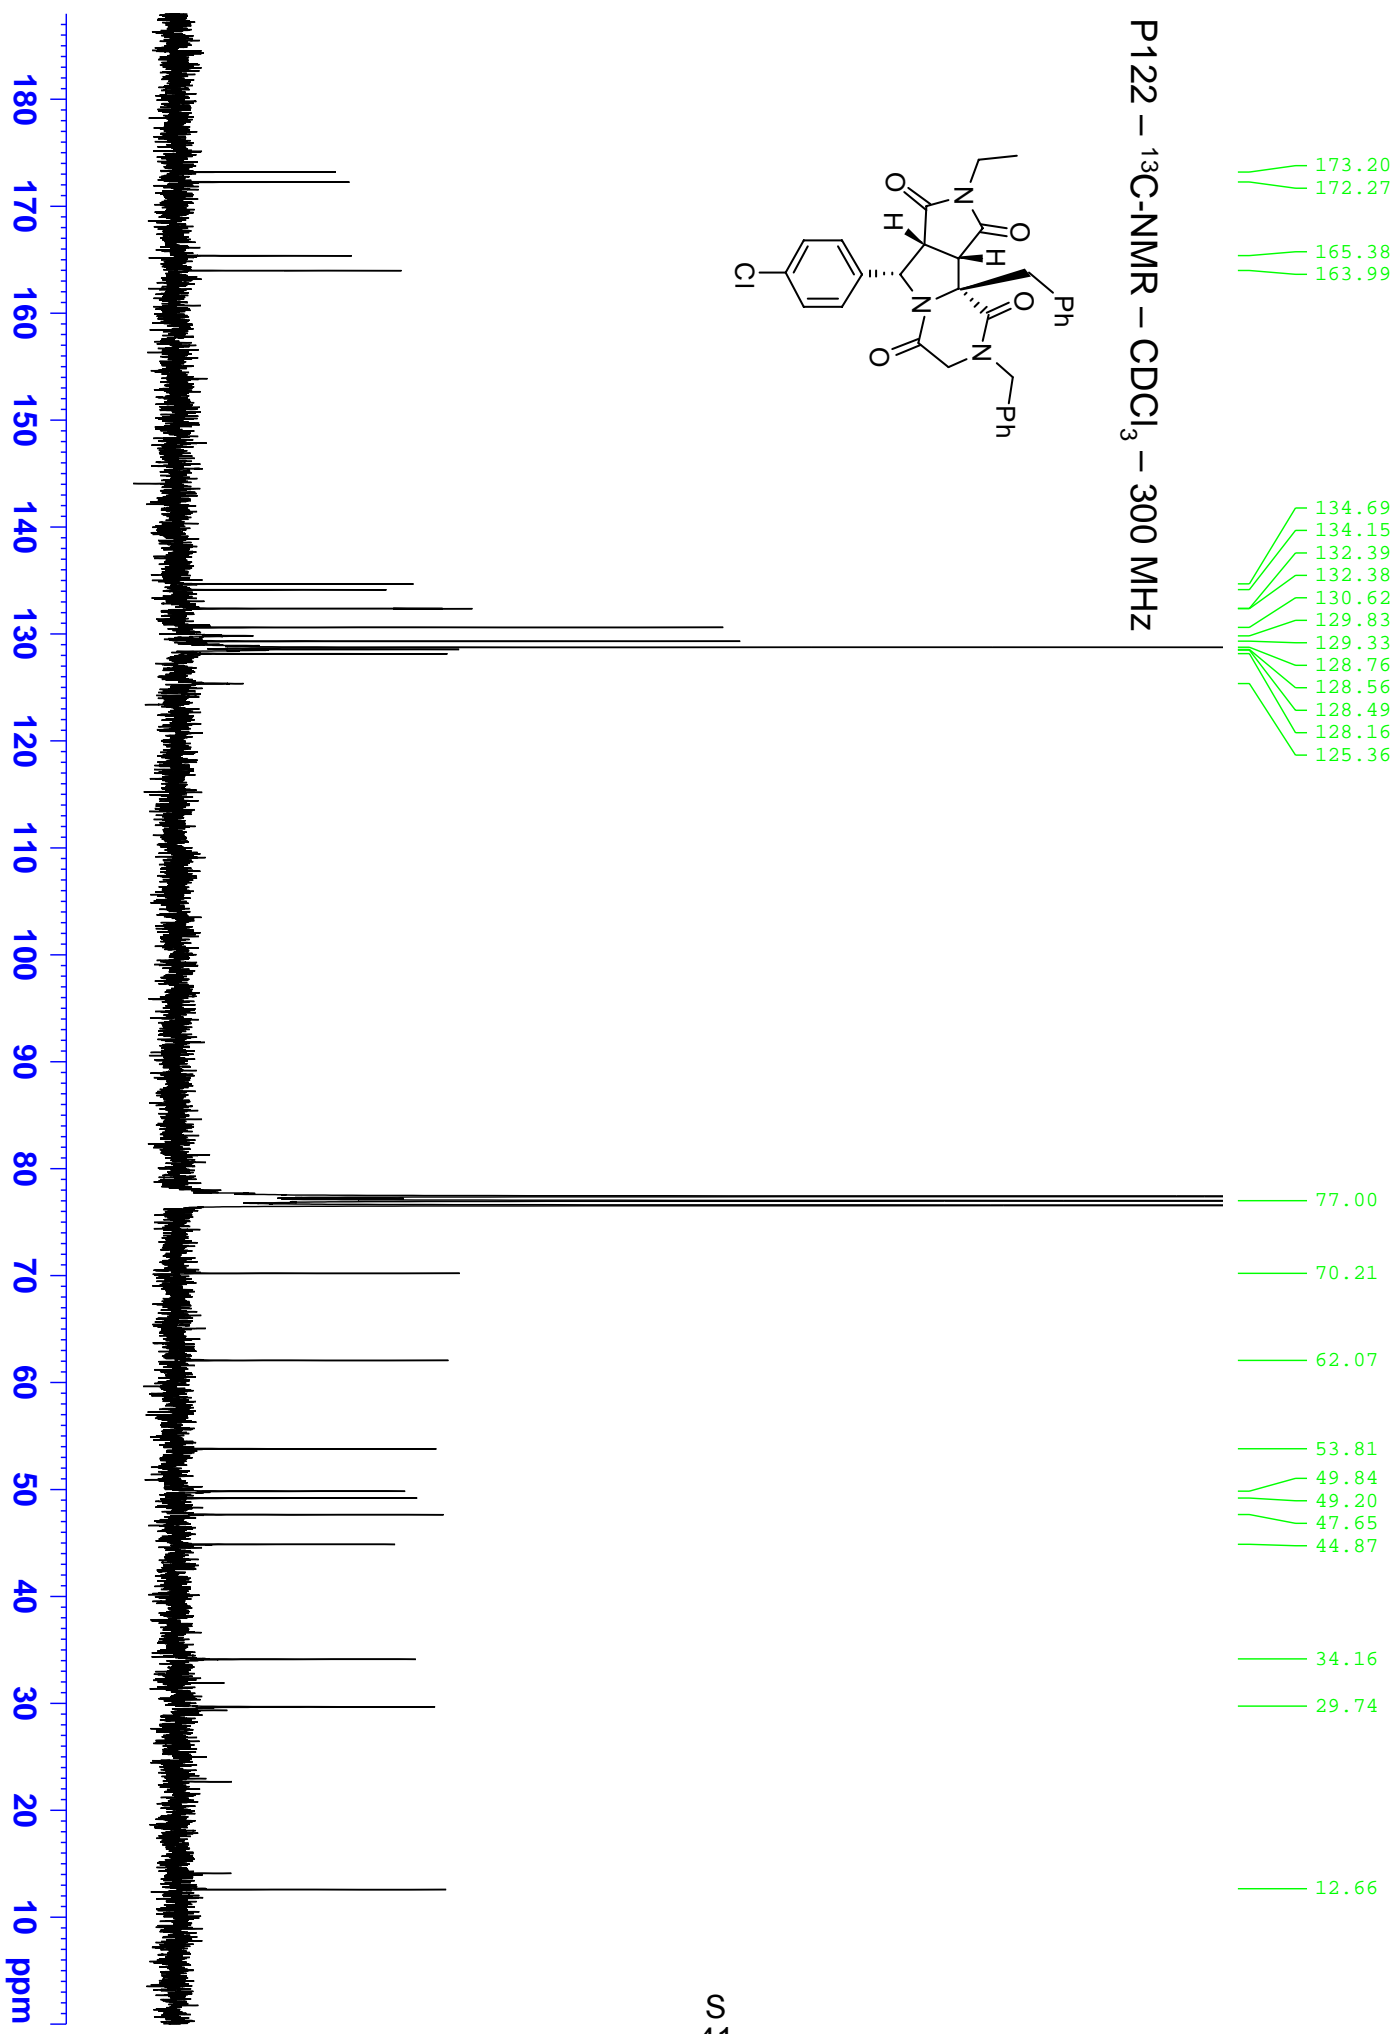

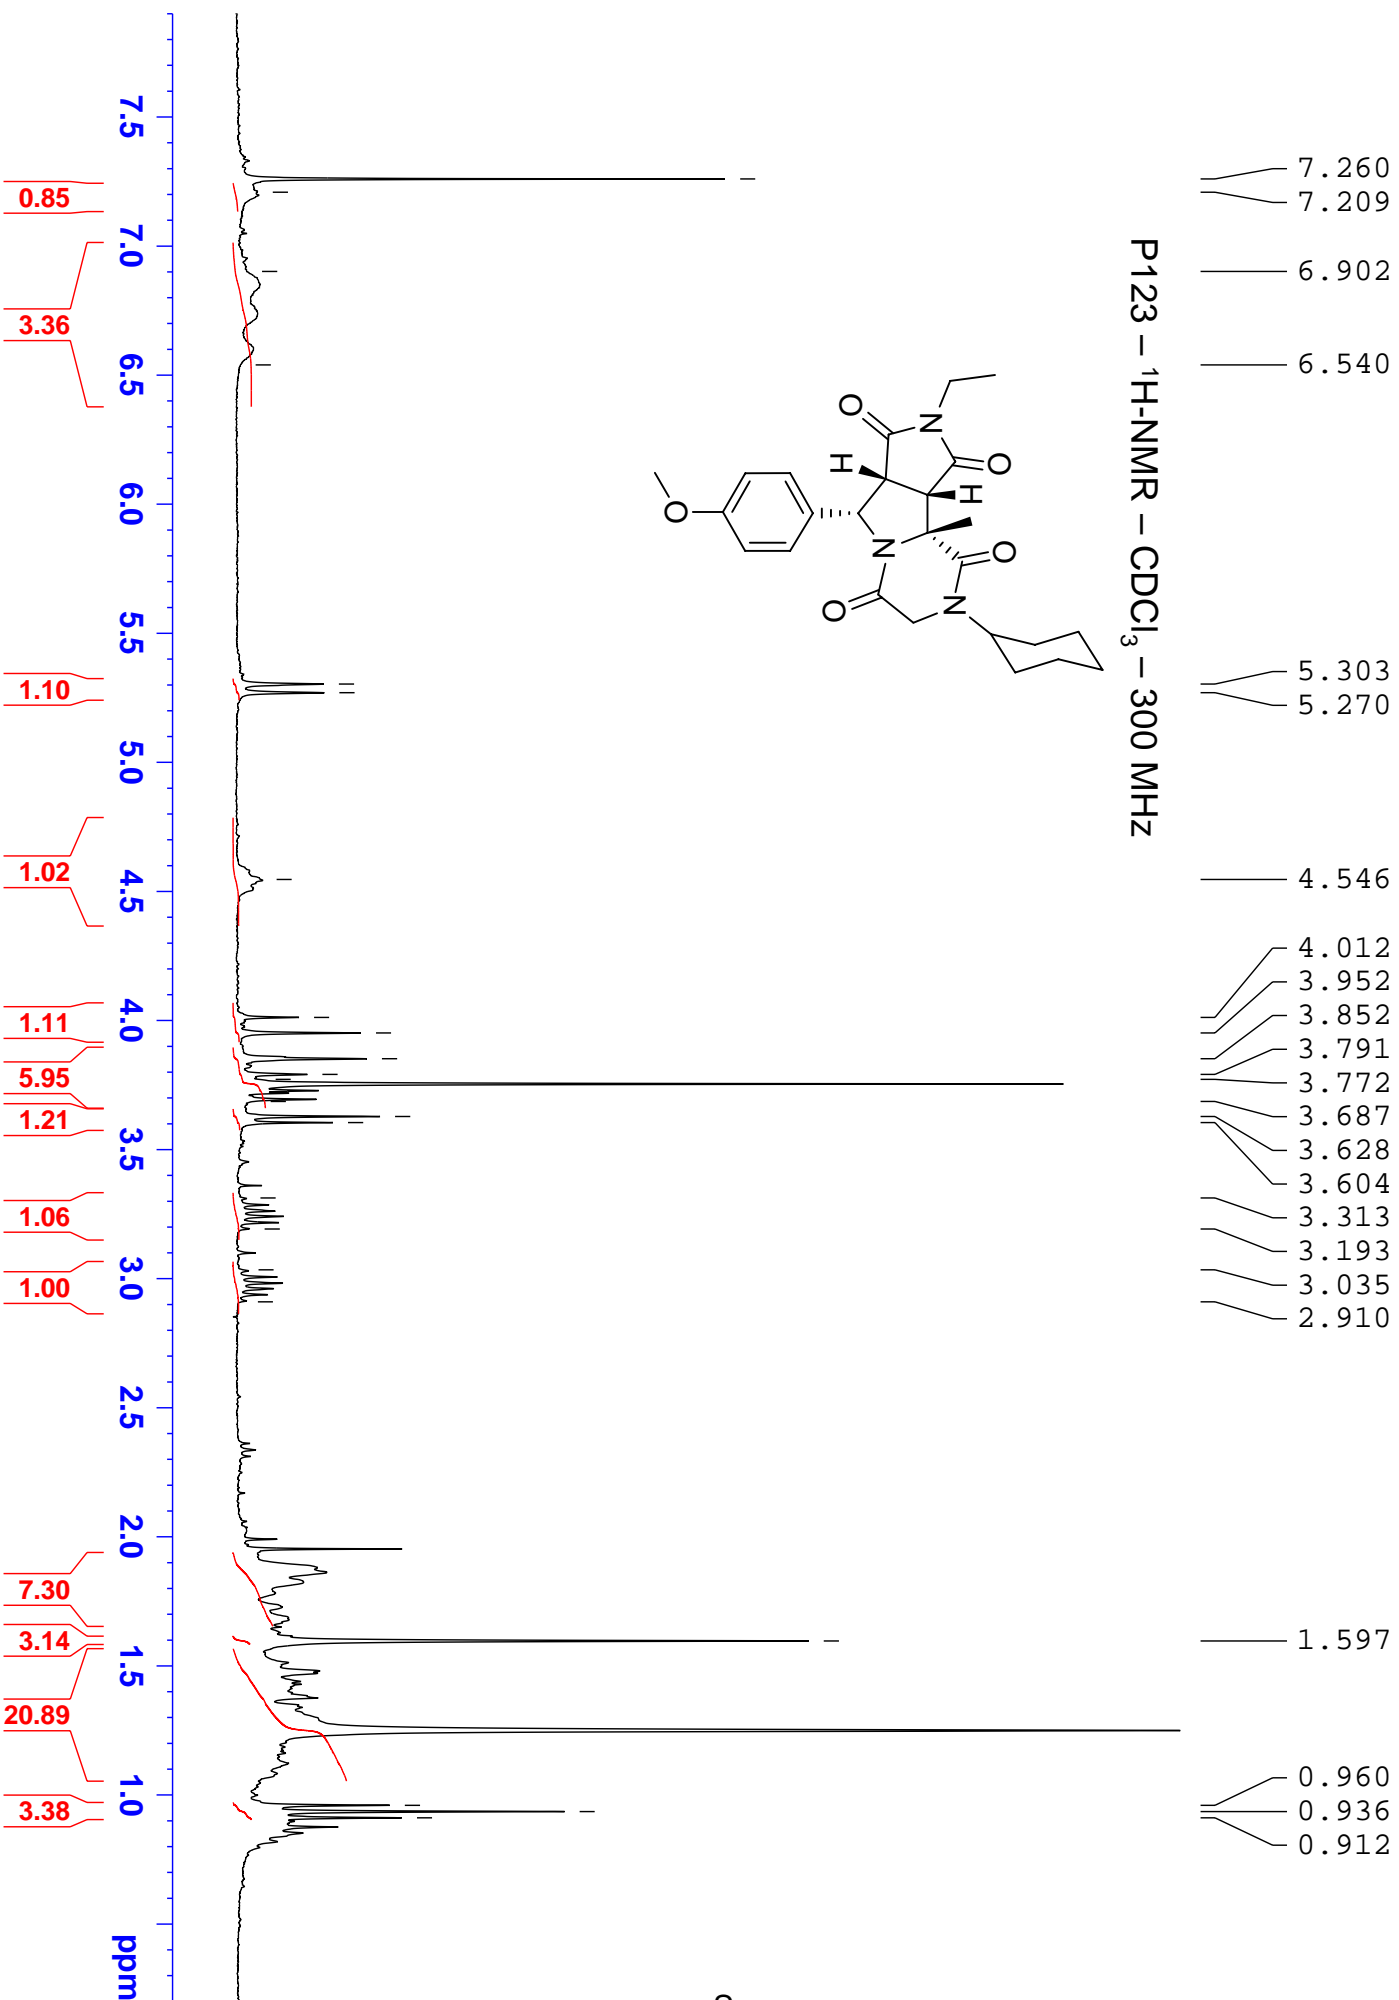

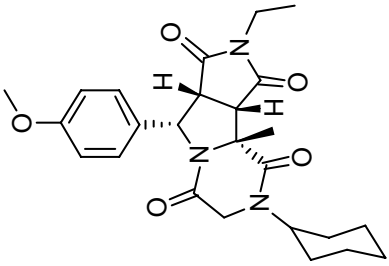

P123 -  $^{13}\text{C}$ -NMR -  $\text{CDCl}_3$  - 300 MHz

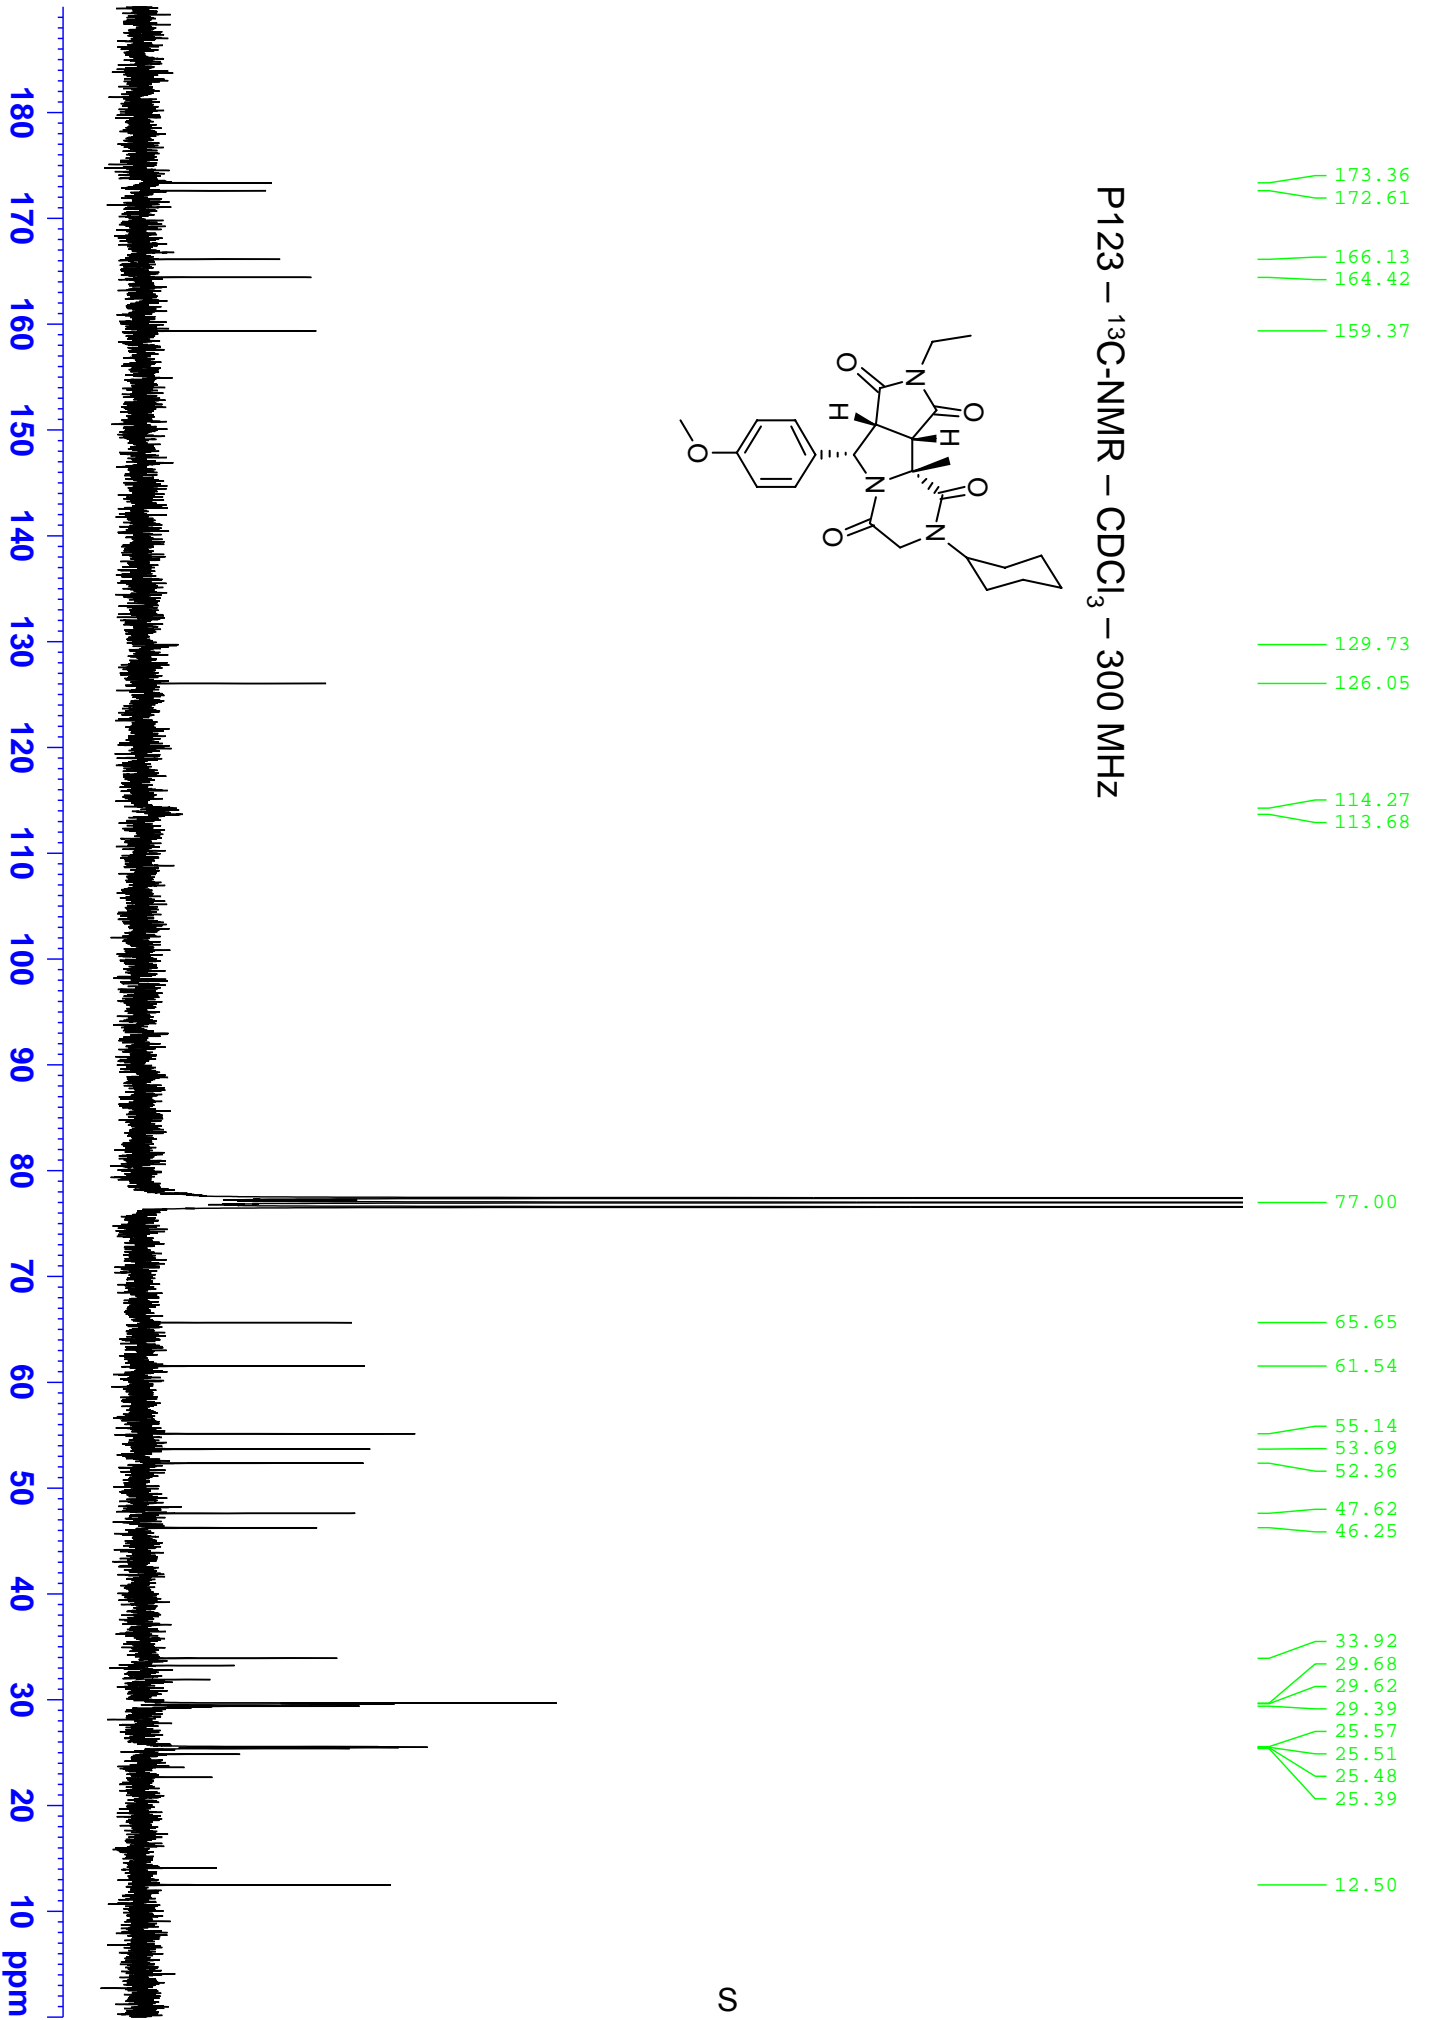

16ADMT006268F2H CDCl3/TMS 300MHz NMR301 5/5/07

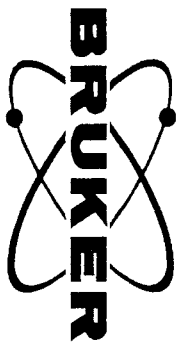

Current Data Parameters  
 NAME 16ADMT006268F2H  
 EXPNO 1  
 PROCNO 1

F2 - Acquisition Parameters  
 Date\_ 20070505  
 Time 11.44  
 INSTRUM spect  
 PROBHD 5 mm QNP 1H/1  
 PULPROG zg  
 TD 32768  
 SOLVENT CDCl3  
 NS 8  
 DS 2  
 SWH 6172.839 Hz  
 FIDRES 0.188380 Hz  
 AQ 2.6542580 sec  
 RG 57  
 DW 81.000 usec  
 DE 6.00 usec  
 TE 293.7 K  
 D1 1.00000000 sec  
 TD0 1

==== CHANNEL f1 =====  
 NUCL 1H  
 P1 7.00 usec  
 PL1 0.00 dB  
 SFO1 300.0868531 MHz

F2 - Processing parameters  
 SI 16384  
 SF 300.0850068 MHz  
 WDW no  
 SSB 0  
 LB 0.00 Hz  
 GB 0  
 PC 1.00

- 7.406
- 7.398
- 7.392
- 7.385
- 7.379
- 7.370
- 7.364
- 7.358
- 7.353
- 7.345
- 7.335
- 7.322
- 7.310
- 7.189
- 7.184
- 7.161
- 6.255
- 6.244
- 5.928
- 5.921
- 5.918
- 5.393
- 5.361
- 4.837
- 4.788
- 4.656
- 4.608
- 3.910
- 3.885
- 3.867
- 3.850
- 3.845
- 3.836
- 3.810
- 2.058
- 1.649

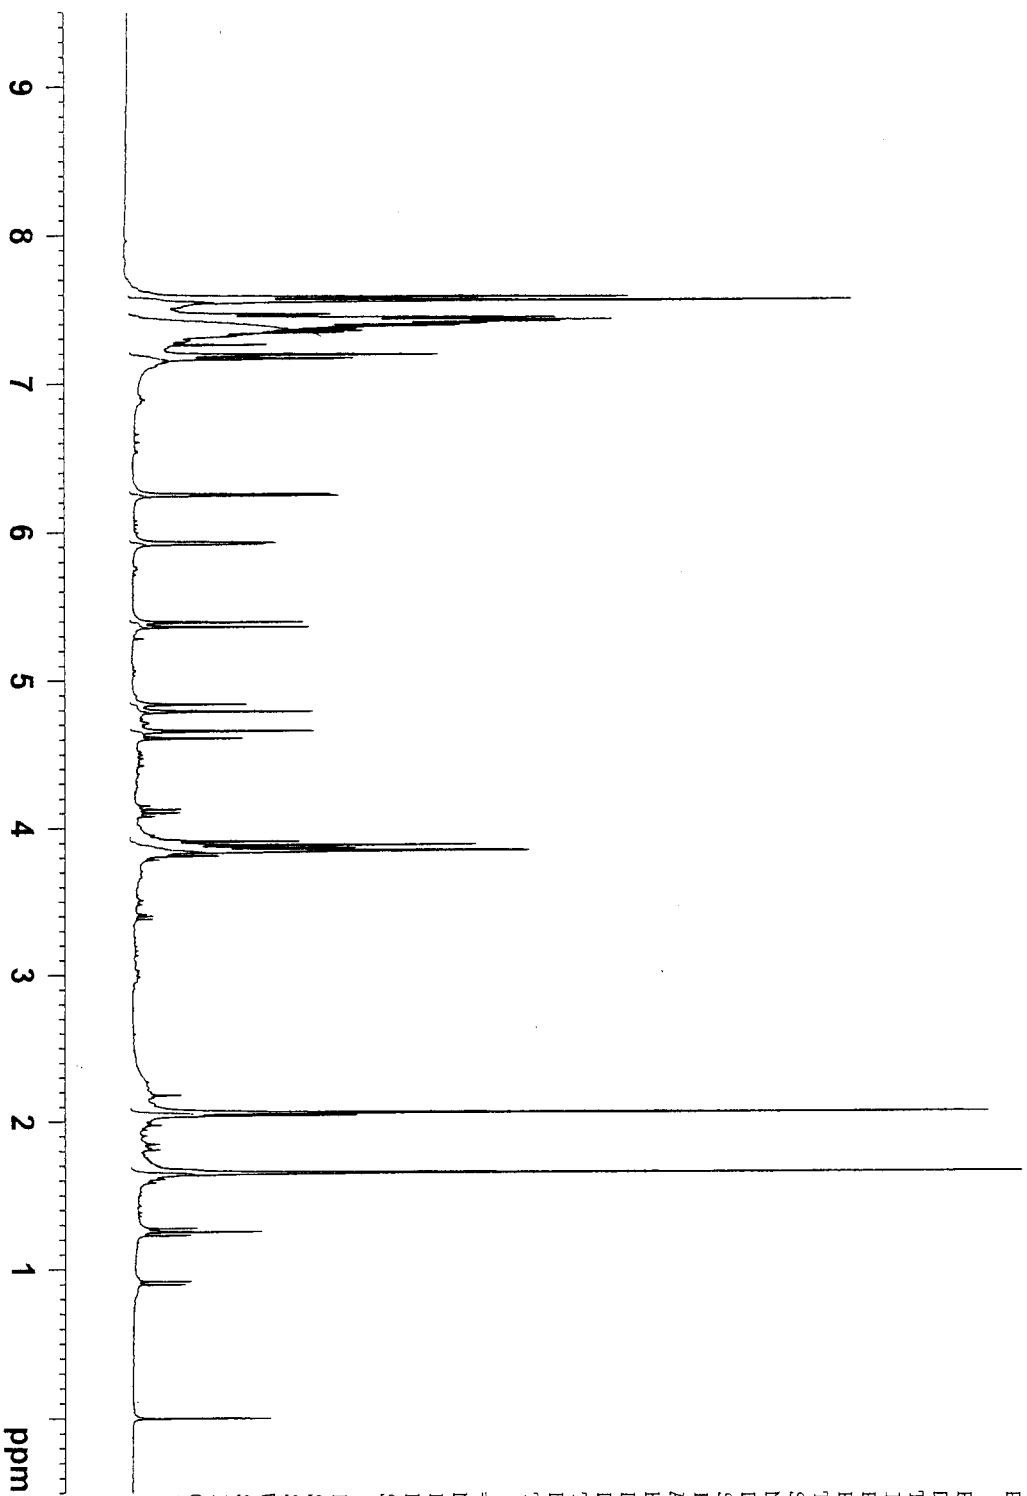

- 172.34
- 171.55
- 166.22
- 163.09
- 152.57
- 144.77
- 141.04
- 140.47
- 134.16
- 131.39
- 128.90
- 128.76
- 128.37
- 127.63
- 127.41
- 127.02
- 125.65
- 110.53
- 106.97
- 65.47
- 56.01
- 53.36
- 50.13
- 48.63
- 46.34
- 25.72
- 13.67

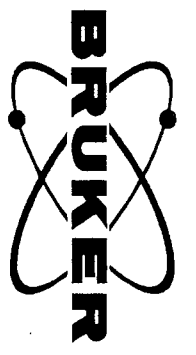

Current Data Parameters  
 NAME 16ADMT006268F2C  
 EXPNO 1  
 PROCNO 1

F2 - Acquisition Parameters  
 Date\_ 20070510  
 Time 14.19  
 INSTRUM spect  
 PROBHD 5 mm DUL 1H-13  
 PULPROG zgpg  
 TD 65536  
 SOLVENT CDC13  
 NS 28  
 DS 4  
 SWH 18115.941 Hz  
 FIDRES 0.276427 Hz  
 AQ 1.8088436 sec  
 RG 32768  
 DW 27.600 usec  
 DE 6.00 usec  
 TE 300.0 K  
 D1 8.00000000 sec  
 d11 0.03000000 sec  
 DELTA 7.90000010 sec  
 TD0 1

==== CHANNEL f1 =====  
 NUC1 13C  
 P1 9.00 usec  
 PL1 1.80 dB  
 SFO1 75.5381641 MHz

==== CHANNEL f2 =====  
 CPDPRG2 waltz16  
 NUC2 1H  
 PCPD2 92.00 usec  
 PL2 0.00 dB  
 PL12 20.00 dB  
 PL13 20.00 dB  
 SFO2 300.3812015 MHz

F2 - Processing parameters  
 SI 65536  
 SF 75.5306165 MHz  
 WDW EM  
 SSB 0  
 LB 1.00 Hz  
 GB 0  
 PC 1.40

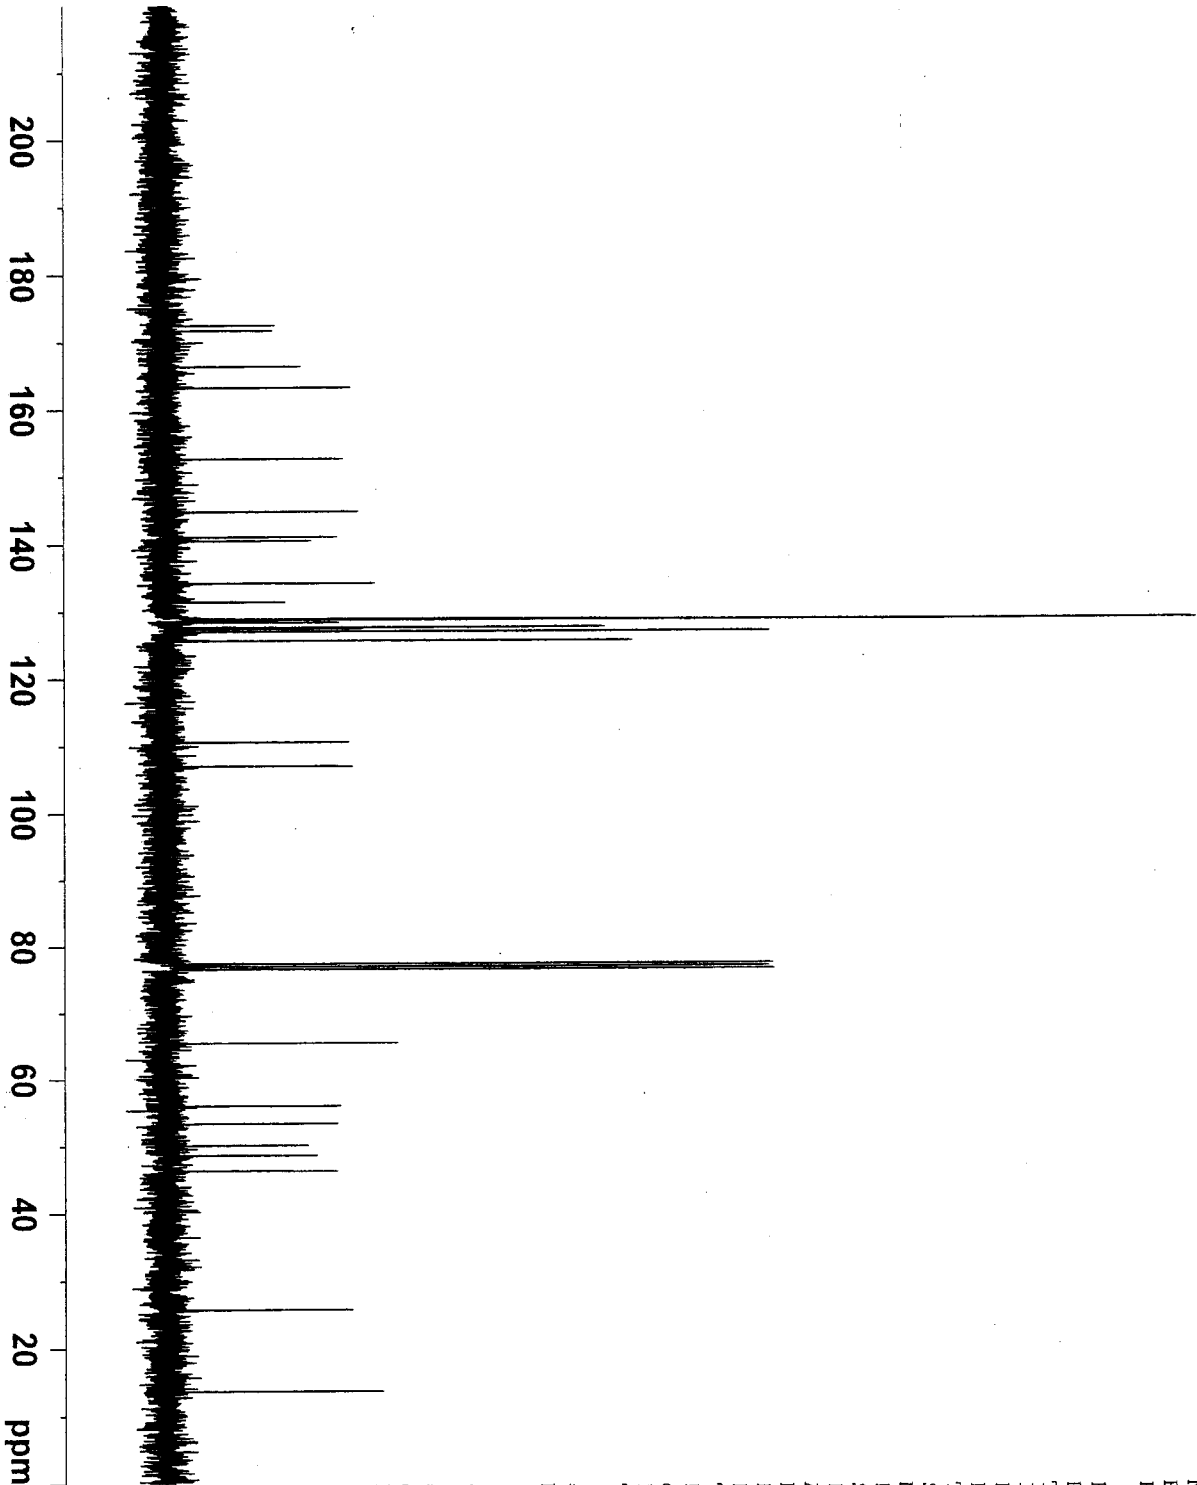

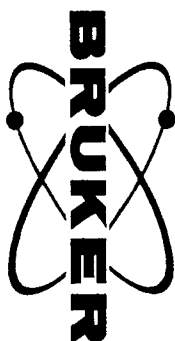

Current Data Parameters  
 NAME 16ADMT006154H  
 EXPNO 1  
 PROCNO 1

F2 - Acquisition Parameters

Date\_ 20070315  
 Time\_ 10.43  
 INSTRUM spect  
 PROBHD 5 mm DUL 1H-13  
 PULPROG zg  
 TD 65536  
 SOLVENT CDCl3  
 NS 8  
 DS 2  
 SWH 6218.905 Hz  
 FIDRES 0.094893 Hz  
 AQ 5.2691445 sec  
 RG 64  
 DW 80.400 usec  
 DE 6.00 usec  
 TE 300.0 K  
 D1 2.00000000 sec  
 TDO 0.00

==== CHANNEL F1 =====

NUC1 1H  
 P1 9.00 usec  
 PL1 1.00 dB  
 SFO1 300.3818550 MHz

F2 - Processing parameters

SI 32768  
 SF 300.3800007 MHz  
 WDW no  
 SSB 0  
 LB 0.00 Hz  
 GB 0  
 PC 1.00

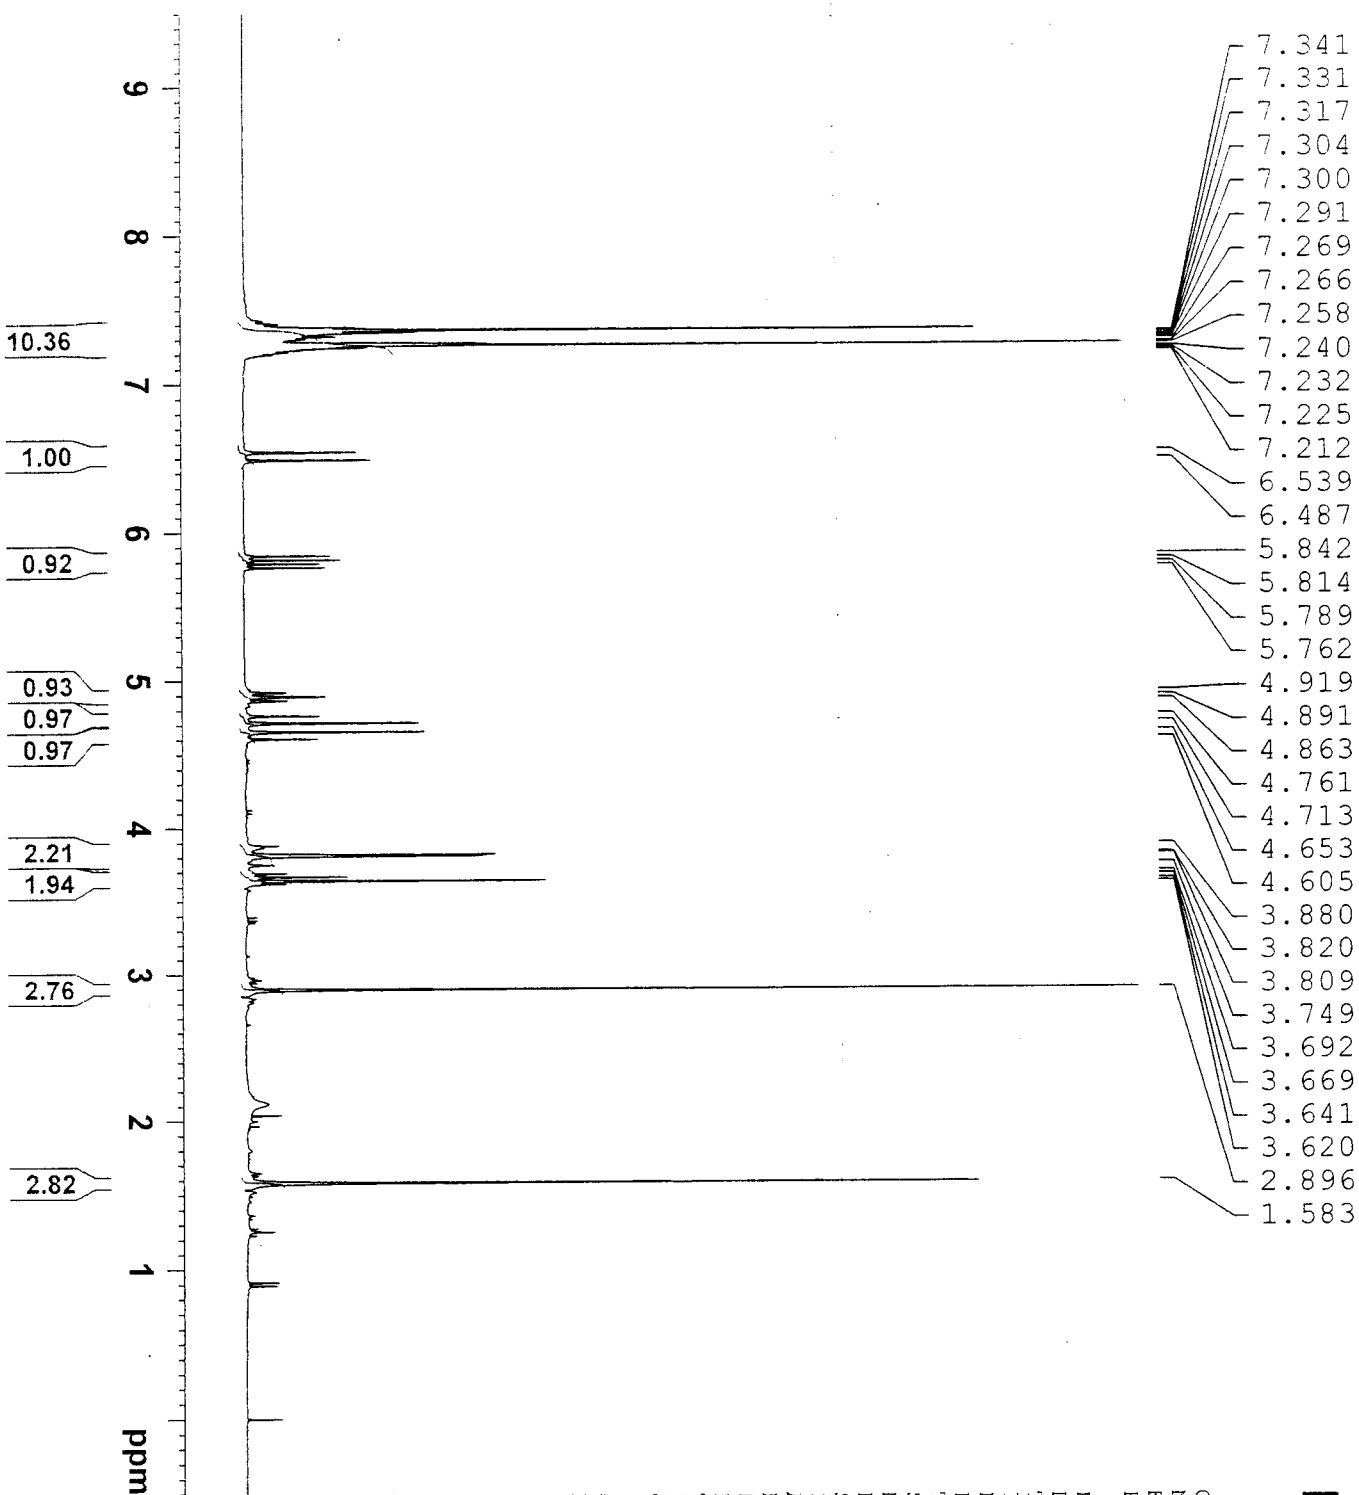

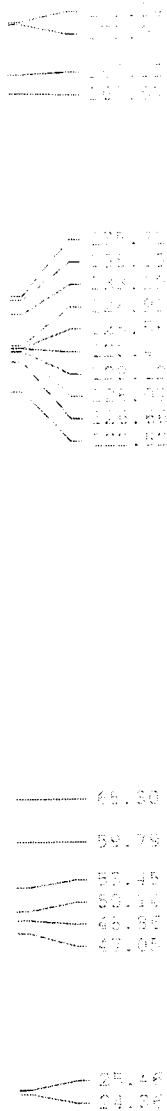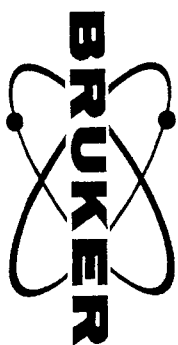

Current Data Parameters  
 NAME 16ADMT006154C  
 EXPNO 1  
 PROCNO 1

F2 - Acquisition Parameters  
 Date\_ 20070323  
 Time\_ 17.22  
 INSTRUM spect  
 PROBHD 5 mm DUL 1H-13  
 PULPROG zgpg  
 TD 65536  
 SOLVENT CDC13  
 NS 40  
 DS 4  
 SMH 18115.941 Hz  
 FIDRES 0.276427 Hz  
 AQ 1.8088436 sec  
 RG 32768  
 DW 27.600 usec  
 DE 6.00 usec  
 TE 300.0 K  
 D1 6.00000000 sec  
 d11 0.03000000 sec  
 DELTA 5.90000010 sec  
 TDO 1

==== CHANNEL F1 =====  
 NUC1 13C  
 P1 9.00 usec  
 PL1 1.80 dB  
 SFO1 75.5381641 MHz

==== CHANNEL F2 =====  
 CPDPRG2 waltz16  
 NUC2 1H  
 PCPD2 92.00 usec  
 PL2 0.00 dB  
 PL12 20.00 dB  
 PL13 20.00 dB  
 SFO2 300.3812015 MHz

F2 - Processing parameters  
 SI 65536  
 SF 75.5306168 MHz  
 WDW EM  
 SSB 0  
 LB 1.00 Hz  
 GB 0  
 PC 1.40

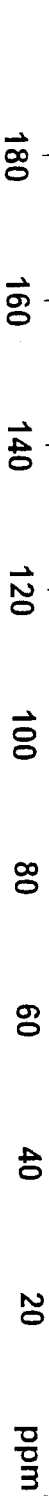

16ADMT006152H CDCl3/TMS 300MHz NMR301a

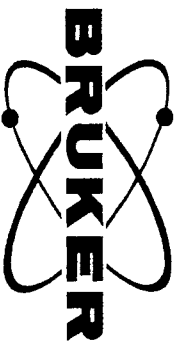

- 7.301
- 7.298
- 7.287
- 7.268
- 7.263
- 7.252
- 6.626
- 6.574
- 5.837
- 5.808
- 5.785
- 5.756
- 4.948
- 4.918
- 4.888
- 4.117
- 4.105
- 3.935
- 3.905
- 3.893
- 3.855
- 3.847
- 3.836
- 3.802
- 3.790
- 3.783
- 3.734
- 3.718
- 3.701
- 3.686
- 3.662
- 3.631
- 3.617
- 3.594
- 3.497
- 3.485
- 3.473
- 3.462
- 3.438
- 3.434
- 3.416
- 3.400
- 2.919
- 1.607

Current Data Parameters  
 NAME 16ADMT006152H  
 EXPNO 1  
 PROCNO 1

F2 - Acquisition Parameters  
 Date\_ 20070315  
 Time\_ 10.34  
 INSTRUM spect  
 PROBHD 5 mm DUL 1H-13  
 PULPROG zg  
 TD 65536  
 SOLVENT CDCl3  
 NS 8  
 DS 2  
 SWH 6218.905 Hz  
 FIDRES 0.094893 Hz  
 AQ 5.2691445 sec  
 RG 181  
 DW 80.400 usec  
 DE 6.00 usec  
 TE 300.0 K  
 D1 2.00000000 sec  
 TD0 1

==== CHANNEL f1 =====  
 NUC1 1H  
 P1 9.00 usec  
 PL1 1.00 dB  
 SFO1 300.3818550 MHz  
 F2 - Processing parameters  
 SI 32768  
 SF 300.3800003 MHz  
 WDW no  
 SSB 0  
 LB 0.00 Hz  
 GB 0  
 PC 1.00

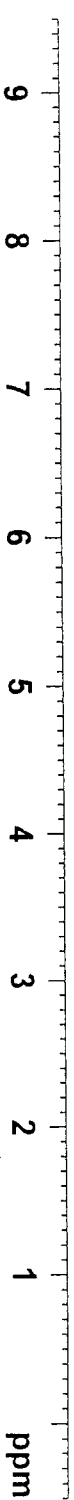

- 5.09
- 1.00
- 0.96
- 0.91
- 2.19
- 2.00
- 0.97
- 2.04
- 1.27
- 2.68
- 0.88
- 2.79



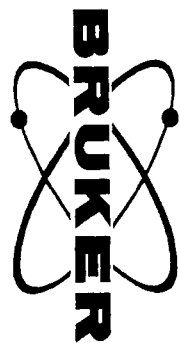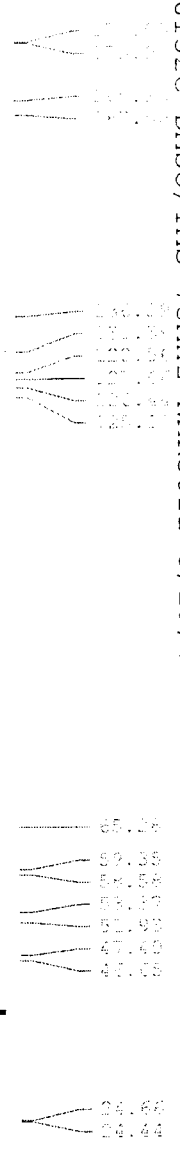

Current Data Parameters  
 NAME 16ADMT006152C  
 EXPNO 1  
 PROCNO 1

F2 - Acquisition Parameters

Date\_ 20070329  
 Time 11.52  
 INSTRUM spect  
 PROBHD 5 mm DUL 1H-13  
 PULPROG zgpg  
 TD 65536  
 SOLVENT DMSO  
 NS 44  
 DS 4  
 SWH 18115.941 Hz  
 FIDRES 0.276427 Hz  
 AQ 1.8088436 sec  
 RG 32768  
 DW 27.600 usec  
 DE 6.00 usec  
 TE 300.0 K  
 D1 8.00000000 Sec  
 d11 0.03000000 sec  
 DELTA 7.90000010 sec  
 TD0 1

==== CHANNEL F1 =====  
 NUC1 13C  
 P1 9.00 usec  
 PL1 1.80 dB  
 SFO1 75.5381641 MHz

==== CHANNEL F2 =====  
 CPDPRG2 waltz16  
 NUC2 1H  
 PCPD2 92.00 usec  
 PL2 0.00 dB  
 PL12 20.00 dB  
 PL13 20.00 dB  
 SFO2 300.3812015 MHz

F2 - Processing parameters  
 SI 65536  
 FE 75.5306411 MHz  
 WDW EM  
 SSB 0  
 LB 1.00 Hz  
 GB 0  
 PC 1.40

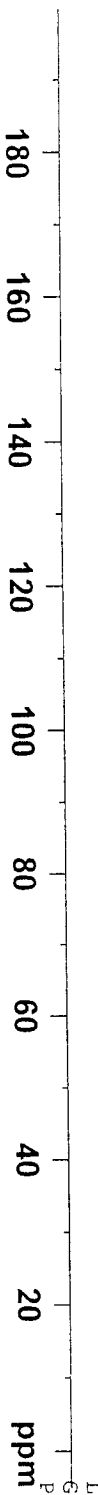

16ADMT006162F1H CDC13/TMS 300MHz NMR301 3/20/07

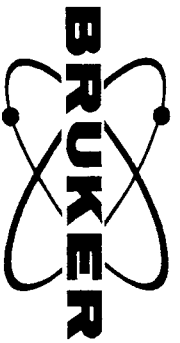

- 7.414
- 7.409
- 7.386
- 7.334
- 7.330
- 7.307
- 7.282
- 7.263
- 7.259
- 7.253
- 7.239
- 7.217
- 7.210
- 7.190
- 7.183
- 7.164
- 7.159
- 6.594
- 6.541
- 6.297
- 6.271
- 6.245
- 6.218
- 4.031
- 3.975
- 3.862
- 3.836
- 3.809
- 3.780
- 3.754
- 3.604
- 3.559
- 3.267
- 3.241
- 3.215
- 3.063
- 2.882
- 2.836
- 1.910
- 1.885
- 1.828
- 1.800
- 1.783
- 1.762

Current Data Parameters  
 NAME 16ADMT006162F1H  
 EXPNO 1  
 PROCNO 1

F2 - Acquisition Parameters

Date\_ 20070320  
 Time 10.30  
 INSTRUM spect  
 PROBHD 5 mm QNP 1H/1  
 PULPROG zg  
 TD 32768  
 SOLVENT CDC13  
 NS 8  
 DS 2  
 SWH 6172.839 Hz  
 FIDRES 0.188380 Hz  
 AQ 2.6542580 sec  
 RG 128  
 DW 81.000 usec  
 DE 6.00 usec  
 TE 300.0 K  
 D1 1.00000000 sec  
 TD0 95

==== CHANNEL F1 =====

NUC1 1H  
 P1 7.00 usec  
 PL1 0.00 dB  
 SFO1 300.0868531 MHz  
 F2 - Processing parameters  
 SI 16384  
 SF 300.0850069 MHz  
 WDW no  
 SSB 0  
 LB 0.00 Hz  
 GB 0  
 PC 1.00

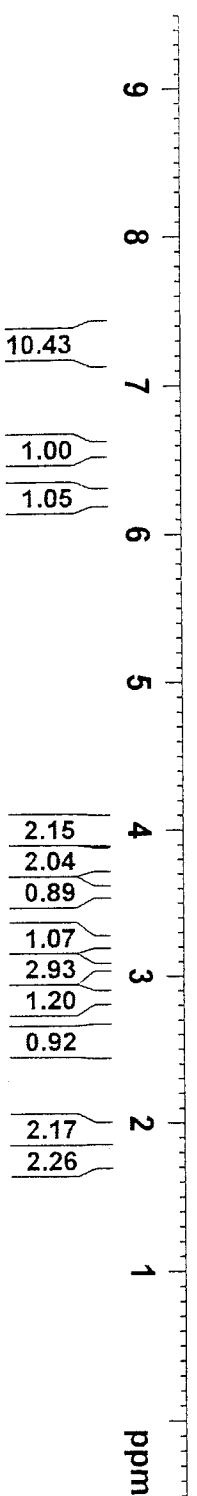

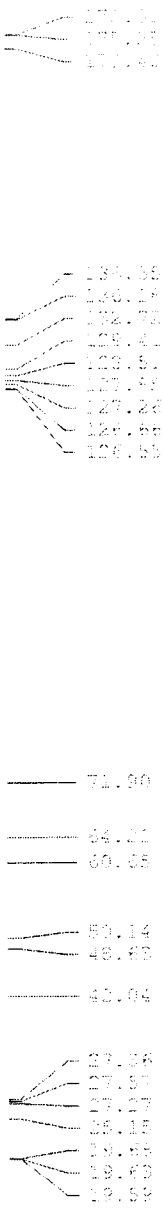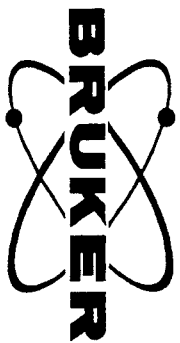

Current Data Parameters  
 NAME 16ADMT006162F1C  
 EXPNO 1  
 PROCNO 1

F2 - Acquisition Parameters  
 Date\_ 20070323  
 Time 11.14  
 INSTRUM spect  
 PROBHD 5 mm DUL 1H-13  
 PULPROG zgpg9  
 TD 65536  
 SOLVENT CDC13  
 NS 29  
 DS 4  
 SWH 18115.941 Hz  
 FIDRES 0.276427 Hz  
 AQ 1.8088436 sec  
 RG 32768  
 DE 27.600 usec  
 TE 6.00 usec  
 D1 10.00000000 sec  
 d11 0.03000000 sec  
 DELTA 9.89999962 sec  
 TDO 1

==== CHANNEL F1 =====  
 NUC1 13C  
 P1 9.00 usec  
 PL1 1.80 dB  
 SFO1 75.5381641 MHz

==== CHANNEL F2 =====  
 CPDPRG2 waltz16  
 NUC2 1H  
 PCPD2 92.00 usec  
 PL2 0.00 dB  
 PL12 20.00 dB  
 PL13 20.00 dB  
 SFO2 300.3812015 MHz

F2 - Processing parameters  
 SI 65536  
 SF 75.5306144 MHz  
 WDM EM  
 SSB 0  
 LB 1.00 Hz  
 GB 0  
 PC 1.40

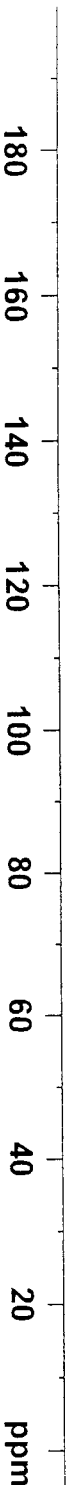

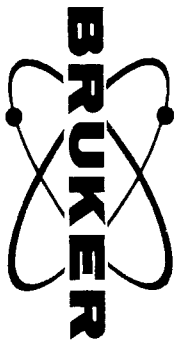

Current Data Parameters  
 NAME 16ADMT006162F2H2  
 EXPNO 1  
 PROCNO 1

F2 - Acquisition Parameters

Date\_ 20070322  
 Time 11.43  
 INSTRUM spect  
 PROBHD 5 mm DUL 1H-13  
 PULPROG zg  
 TD 65536  
 SOLVENT CDCl3  
 NS 8  
 DS 2  
 SWH 6218.905 Hz  
 FIDRES 0.094893 Hz  
 AQ 5.2691445 sec  
 RG 50.8  
 DW 80.400 usec  
 DE 6.00 usec  
 TE 300.0 K  
 D1 2.00000000 sec  
 TDO 1

==== CHANNEL F1 =====

NUC1 1H  
 P1 9.00 usec  
 PL1 1.00 dB  
 SFO1 300.3818550 MHz

F2 - Processing parameters

SI 32768  
 SF 300.3800061 MHz  
 WDW no  
 SSB 0  
 LB 0.00 Hz  
 GB 0  
 PC 1.00

- 7.387
- 7.364
- 7.362
- 7.325
- 7.320
- 7.304
- 7.297
- 7.291
- 7.280
- 7.273
- 7.248
- 7.236
- 7.226
- 7.176
- 7.170
- 7.150
- 6.712
- 6.659
- 6.254
- 6.231
- 6.201
- 6.178
- 4.380
- 4.355
- 4.341
- 4.326
- 4.304
- 4.284
- 4.264
- 4.245
- 3.497
- 3.470
- 3.442
- 3.404
- 3.373
- 3.359
- 3.348
- 3.068
- 3.023
- 2.923
- 2.206
- 2.079
- 2.056
- 2.029

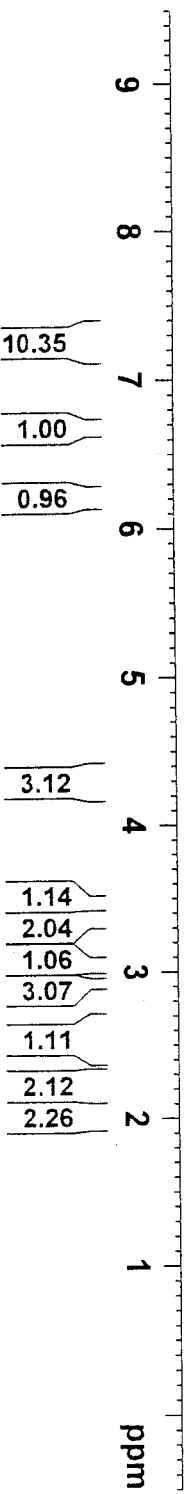

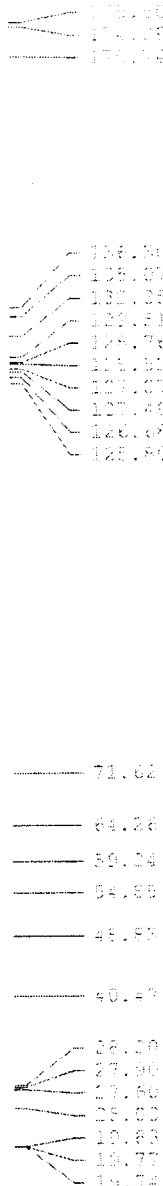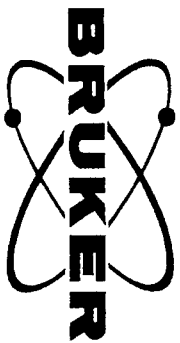

Current Data Parameters  
 NAME 16ADMT006162F2C  
 EXPNO 1  
 PROCNO 1

F2 - Acquisition Parameters  
 Date\_ 20070323  
 Time\_ 17.07  
 INSTRUM spect  
 PROBHD 5 mm DUL 1H-13  
 PULPROG zgpg9  
 TD 65536  
 SOLVENT CDC13  
 NS 49  
 DS 4  
 SWH 18115.941 Hz  
 FIDRES 0.276427 Hz  
 AQ 1.8088436 sec  
 RG 32768  
 DW 27.600 usec  
 DE 6.00 usec  
 TE 300.0 K  
 D1 6.00000000 sec  
 d11 0.03000000 sec  
 DELTA 5.90000010 sec  
 TDO 1

==== CHANNEL F1 =====  
 NUC1 13C  
 P1 9.00 usec  
 PL1 1.80 dB  
 SFO1 75.5381641 MHz

==== CHANNEL F2 =====  
 CPDPRG2 waltz16  
 NUC2 1H  
 PCPD2 92.00 usec  
 PL2 0.00 dB  
 PL12 20.00 dB  
 PL13 20.00 dB  
 SFO2 300.3812015 MHz

F2 - Processing parameters  
 SI 65536  
 SF 75.5306139 MHz  
 WDM EM  
 SSB 0  
 LB 1.00 Hz  
 GB 0  
 PC 1.40

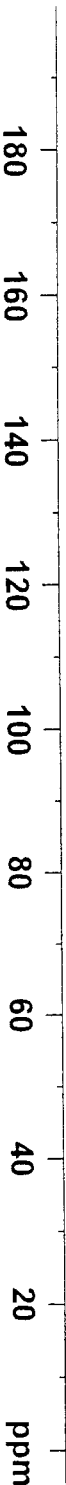

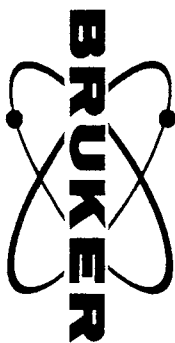

Current Data Parameters  
 NAME 16ADMT005216H  
 EXPNO 1  
 PROCNO 1

- 7.450
- 7.427
- 7.402
- 7.379
- 7.356
- 7.335
- 7.330
- 7.260
- 7.257
- 7.248
- 7.244
- 7.220
- 6.298
- 6.288
- 5.921
- 5.918
- 5.911
- 4.838
- 4.807
- 4.363
- 4.343
- 4.323
- 3.667
- 3.641
- 3.637
- 3.611
- 3.500
- 3.474
- 2.362
- 2.308
- 2.274
- 2.248
- 2.220
- 2.177
- 2.110
- 2.091
- 2.067
- 2.043
- 1.586

F2 - Acquisition Parameters

Date\_ 20061116  
 Time\_ 14.06  
 INSTRUM spect  
 PROBHD 5 mm QNP 1H/1  
 PULPROG zg30  
 TD 65536  
 SOLVENT CDCl3  
 NS 8  
 DS 2  
 SWH 6172.839 Hz  
 FIDRES 0.094190 Hz  
 AQ 5.3084660 sec  
 RG 456.1  
 DW 81.000 usec  
 DE 6.00 usec  
 TE 300.0 K  
 D1 1.00000000 sec  
 TD0 1

==== CHANNEL F1 =====

NUC1 1H  
 P1 9.00 usec  
 PL1 0.00 dB  
 SFO1 300.0868531 MHz

F2 - Processing parameters

SI 32768  
 SF 300.0850039 MHz  
 WDW no  
 SSB 0  
 LB 0.00 Hz  
 GB 0  
 PC 1.00

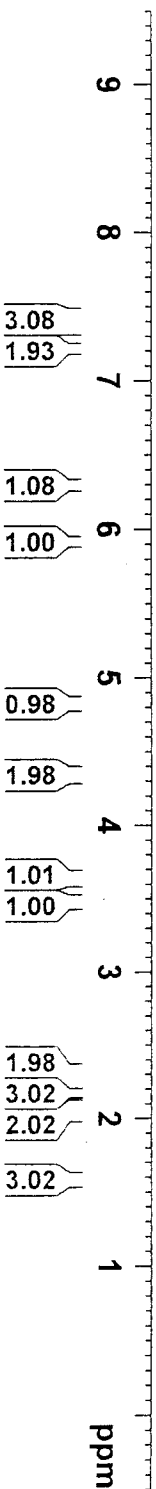

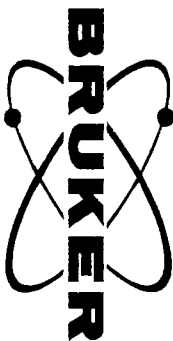

- 7.441
- 7.434
- 7.418
- 7.410
- 7.402
- 7.398
- 7.393
- 7.377
- 7.363
- 7.354
- 7.326
- 7.321
- 7.298
- 7.274
- 7.242
- 7.233
- 7.208
- 7.203
- 7.195
- 7.186
- 7.180
- 6.786
- 6.733
- 6.444
- 6.422
- 6.391
- 6.369
- 4.397
- 4.333
- 4.313
- 4.293
- 3.664
- 3.637
- 3.610
- 3.431
- 3.405
- 2.257
- 2.226
- 2.167
- 2.108
- 2.085
- 2.063
- 2.040
- 1.640

Current Data Parameters  
 NAME 16ADMT005218H  
 EXPNO 1  
 PROCNO 1

F2 - Acquisition Parameters

Date\_ 20061116  
 Time\_ 14.15  
 INSTRUM spect  
 PROBHD 5 mm QNP 1H/1  
 PULPROG zg30  
 TD 65536  
 SOLVENT CDCl3  
 NS 8  
 DS 2  
 SWH 6172.839 Hz  
 FIDRES 0.094190 Hz  
 AQ 5.3081660 sec  
 RG 456.1  
 DW 81.000 usec  
 DE 6.00 usec  
 TE 300.0 K  
 D1 1.00000000 sec  
 TD0 1

==== CHANNEL F1 =====

NUC1 1H  
 P1 9.00 usec  
 PL1 0.00 dB  
 SFO1 300.0868531 MHz

F2 - Processing parameters

SI 32768  
 SF 300.0850048 MHz  
 WDW no  
 SSB 0  
 LB 0.00 Hz  
 GB 0  
 PC 1.00

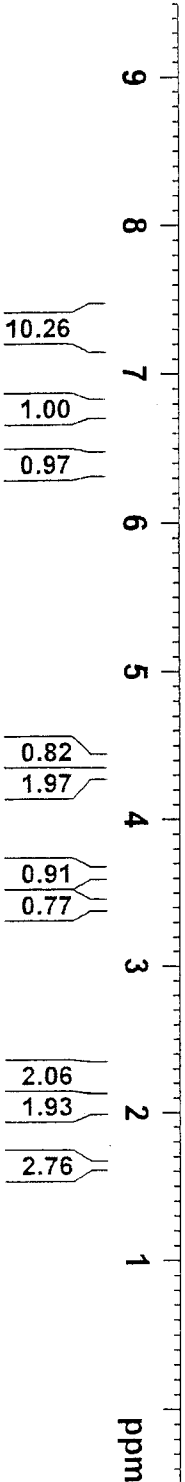

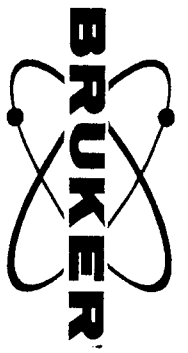

Current Data Parameters  
 NAME 16ADMT005262purH  
 EXPNO 1  
 PROCNO 1

F2 - Acquisition Parameters  
 Date\_ 20061212  
 Time 10.14  
 INSTRUM spect  
 PROBHD 5 mm DUL 1H-13  
 PULPROG zg  
 TD 65536  
 SOLVENT CDCl3  
 NS 8  
 DS 2  
 SWH 6218.905 Hz  
 FIDRES 0.094893 Hz  
 AQ 5.2691445 sec  
 RG 14.3  
 DW 80.400 usec  
 DE 6.00 usec  
 TE 300.0 K  
 D1 2.00000000 sec  
 TD0 1

==== CHANNEL F1 =====  
 NUCL1 1H  
 P1 9.00 usec  
 PL1 1.00 dB  
 SFO1 300.3818550 MHz

F2 - Processing parameters  
 SI 32768  
 SF 300.3799611 MHz  
 WDW no  
 SSB 0  
 LB 0.00 Hz  
 GB 0  
 PC 1.00

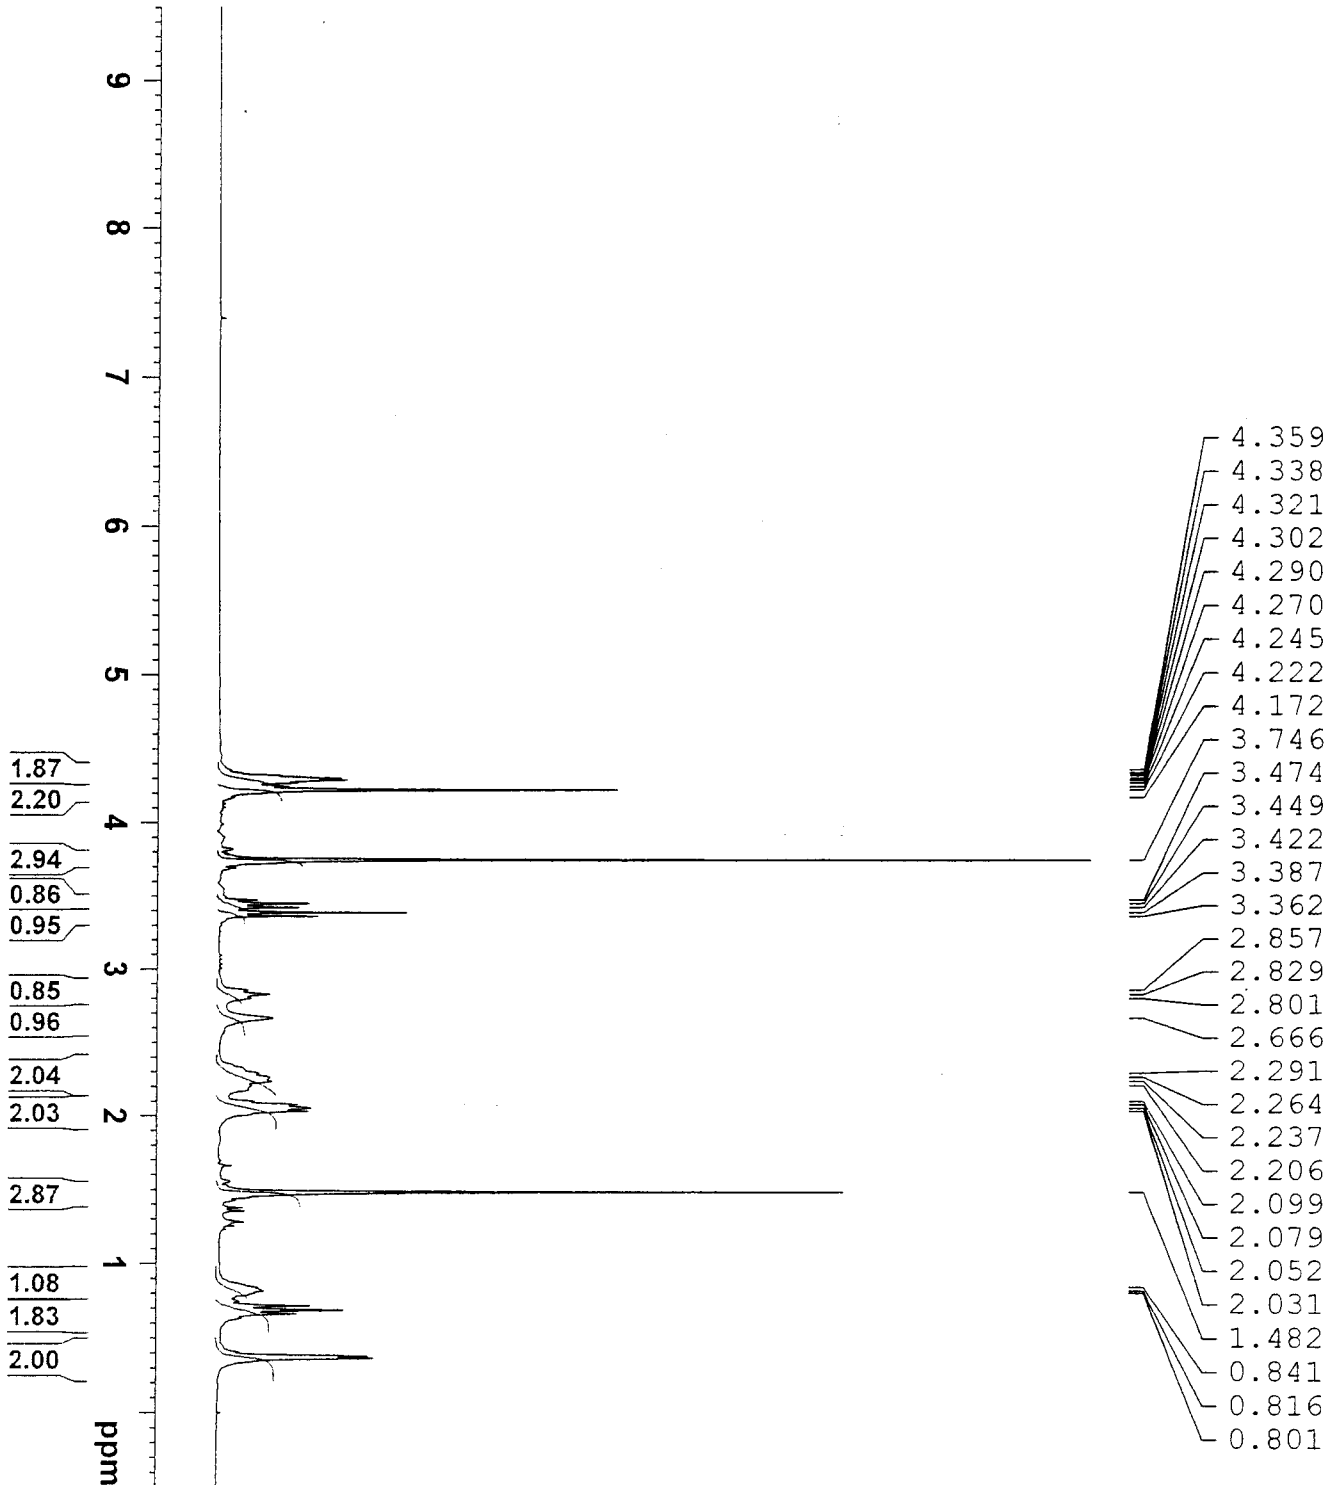



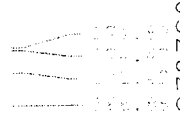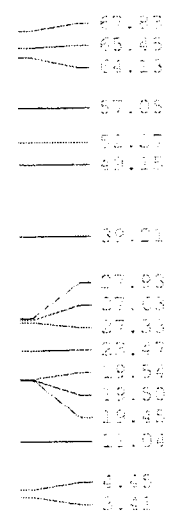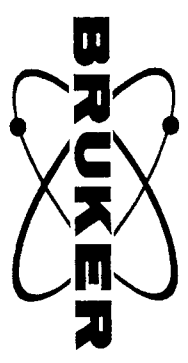

Current Data Parameters  
 NAME 16ADMT005262C  
 EXPNO 1  
 PROCNO 1

F2 - Acquisition Parameters  
 Date\_ 20061212  
 Time 17.08  
 INSTRUM spect  
 PROBHD 5 mm DUL 1H-13  
 PULPROG zgpg  
 TD 65536  
 SOLVENT CDCl3  
 NS 20  
 DS 4  
 SWH 18115.941 Hz  
 FIDRES 0.276427 Hz  
 AQ 1.8088436 sec  
 RG 32768  
 DW 27.600 usec  
 DE 6.00 usec  
 TE 300.0 K  
 D1 10.00000000 sec  
 d11 0.0300000000 sec  
 DELTA 9.89999962 sec  
 TDO 1

==== CHANNEL F1 =====  
 NUC1 13C  
 P1 9.00 usec  
 PL1 1.80 dB  
 SFO1 75.5381641 MHz

==== CHANNEL F2 =====  
 CPDPRG2 waltz16  
 NUC2 1H  
 PCPD2 92.00 usec  
 PL2 0.00 dB  
 PL12 20.00 dB  
 PL13 20.00 dB  
 SFO2 300.3812015 MHz

F2 - Processing parameters  
 SI 65536  
 SF 75.5306151 MHz  
 WDW EM  
 SSB 0  
 LB 1.00 Hz  
 GB 0  
 PC 1.40

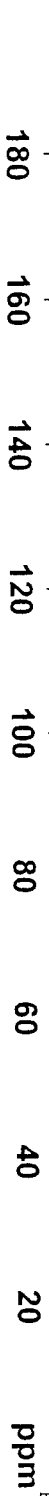

16ADMT005266F2H CDC13/TMS 300MHz NMR301 12/12/06

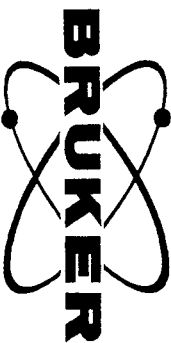

- 7.463
- 7.438
- 7.412
- 7.384
- 7.380
- 7.359
- 7.336
- 7.284
- 7.260
- 7.233
- 4.295
- 4.275
- 4.255
- 3.471
- 3.444
- 3.418
- 3.349
- 3.324
- 2.945
- 2.917
- 2.889
- 2.536
- 2.254
- 2.224
- 2.198
- 2.168
- 2.138
- 2.069
- 2.047
- 2.023
- 2.002
- 1.487
- 0.892
- 0.878
- 0.865
- 0.851
- 0.752
- 0.722
- 0.693
- 0.672
- 0.646
- 0.617
- 0.386
- 0.371

Current Data Parameters  
 NAME 16ADMT005266F2H  
 EXPNO 1  
 PROCNO 1

F2 - Acquisition Parameters

Date\_ 20061212  
 Time 10.42  
 INSTRUM spect  
 PROBHID 5 mm QNP 1H/1  
 PULPROG zg  
 TD 32768  
 SOLVENT CDC13  
 NS 8  
 DS 2  
 SWH 6172.839 Hz  
 FIDRES 0.188380 Hz  
 AQ 2.6542580 sec  
 RG 22.6  
 DW 81.000 usec  
 DE 6.00 usec  
 TE 300.0 K  
 D1 1.00000000 sec  
 TD0 1

==== CHANNEL F1 =====

NUC1 1H  
 P1 7.00 usec  
 P11 0.00 dB  
 SFO1 300.0868531 MHz

F2 - Processing parameters

SI 16384  
 SF 300.0850035 MHz  
 WDM no  
 SSB 0  
 LB 0.00 Hz  
 GB 0  
 PC 1.00

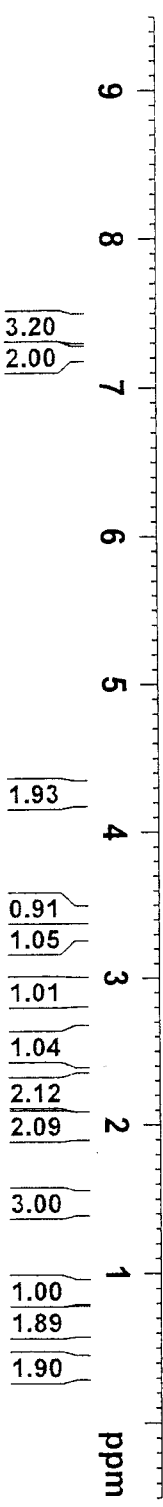

ppm

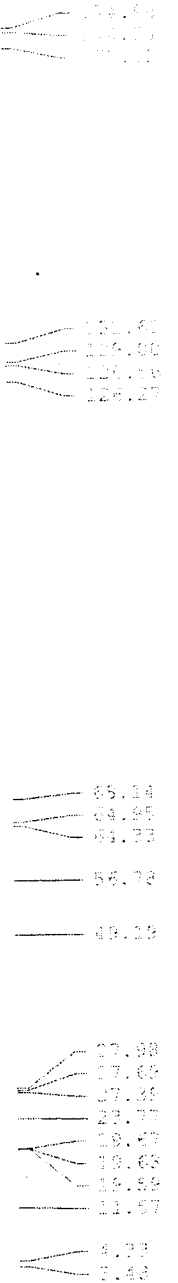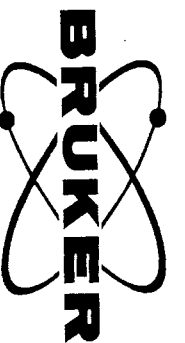

Current Data Parameters  
 NAME 16ADMT005266F2C  
 EXPNO 1  
 PROCNO 1

F2 - Acquisition Parameters  
 Date\_ 20061212  
 Time 17.24  
 INSTRUM spect  
 PROBHD 5 mm DUL 1H-13  
 PULPROG zgpg  
 TD 65536  
 SOLVENT CDCl3  
 NS 24  
 DS 4  
 SWH 18115.941 Hz  
 FIDRES 0.276427 Hz  
 AQ 1.8088436 sec  
 RG 32768  
 DW 27.600 usec  
 DE 6.00 usec  
 TE 300.0 K  
 D1 10.00000000 sec  
 d11 0.0300000000 sec  
 DELTA 9.89999962 sec  
 TD0 1

==== CHANNEL F1 =====  
 NUC1 13C  
 P1 9.00 usec  
 PL1 1.80 dB  
 SFO1 75.5381641 MHz

==== CHANNEL F2 =====  
 CPDPRG2 waltz16  
 NUC2 1H  
 PCPD2 92.00 usec  
 PL2 0.00 dB  
 PL12 20.00 dB  
 PLI3 20.00 dB  
 SFO2 300.3812015 MHz

F2 - Processing parameters  
 SI 65536  
 SF 75.5306164 MHz  
 WDW EM  
 SSB 0  
 LB 1.00 Hz  
 GB 0  
 PC 1.40

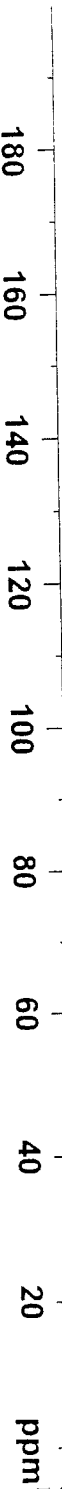

16ADMT005280H3 CDCl3/TMS 300MHz NMR301a 1/12/07

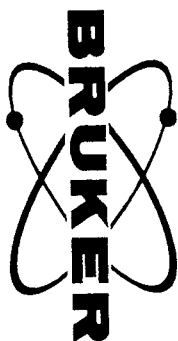

Current Data Parameters  
 NAME 16ADMT005280H3  
 EXPNO 1  
 PROCNO 1

F2 - Acquisition Parameters

Date\_ 20070112  
 Time\_ 17.41  
 INSTRUM spect  
 PROBHD 5 mm DUL 1H-13  
 PULPROG zg  
 TD 65536  
 SOLVENT CDCl3  
 NS 8  
 DS 2  
 SWH 6218.905 Hz  
 FIDRES 0.094893 Hz  
 AQ 5.2691445 sec  
 RG 128  
 DW 80.400 usec  
 DE 6.00 usec  
 TE 300.0 K  
 D1 2.00000000 sec  
 TD0 1

==== CHANNEL f1 =====

NUC1 1H  
 P1 9.00 usec  
 PL1 1.00 dB  
 SFO1 300.3818550 MHz

F2 - Processing parameters

SI 32768  
 SF 300.3800001 MHz  
 WDM no  
 SSB 0  
 LB 0.00 Hz  
 GB 0  
 PC 1.00

- 9.250
- 6.239
- 5.919
- 5.916
- 5.909
- 5.906
- 4.751
- 4.721
- 4.356
- 4.336
- 4.316
- 4.247
- 4.191
- 4.115
- 4.059
- 3.726
- 3.618
- 3.592
- 3.562
- 3.437
- 3.412
- 2.426
- 2.361
- 2.335
- 2.305
- 2.279
- 2.259
- 2.246
- 2.213
- 2.183
- 2.167
- 2.148
- 2.130
- 2.110
- 2.087
- 2.061
- 2.046

- 1.01
- 1.00
- 0.93
- 2.04
- 1.41
- 1.20
- 3.11
- 1.13
- 1.09
- 2.17
- 3.09
- 2.09
- 3.14

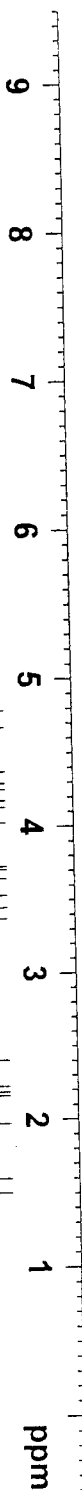

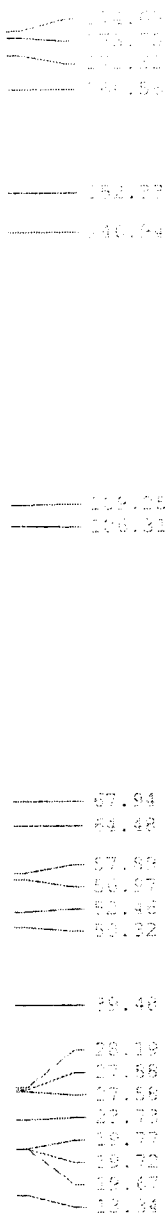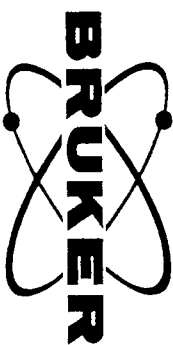

Current Data Parameters  
 NAME 16ADMT005280C2  
 EXPNO 1  
 PROCNO 1

F2 - Acquisition Parameters  
 Date\_ 20061214  
 Time 16.22  
 INSTRUM spect  
 PROBHD 5 mm QNP 1H/1  
 PULPROG zgpg  
 TD 32768  
 SOLVENT CDC13  
 NS 57  
 DS 2  
 SWH 17985.611 Hz  
 FIDRES 0.548877 Hz  
 AQ 0.9110004 sec  
 RG 32768  
 DW 27.800 usec  
 DE 6.00 usec  
 TE 300.0 K  
 D1 4.00000000 sec  
 D11 0.03000000 sec  
 DELTA 3.90000010 sec  
 TD0 1

==== CHANNEL F1 =====  
 NUC1 13C  
 P1 7.00 usec  
 PL1 0.00 dB  
 SFO1 75.4639789 MHz

==== CHANNEL F2 =====  
 CPDPRG2 waltz16  
 NUC2 1H  
 PCPD2 100.00 usec  
 PL2 0.00 dB  
 PL12 18.24 dB  
 PL13 18.24 dB  
 SFO2 300.0862003 MHz

F2 - Processing Parameters  
 SI 16384  
 SF 75.4564357 MHz  
 WDM EM  
 SSB 0  
 LB 1.00 Hz  
 GB 0  
 PC 1.40

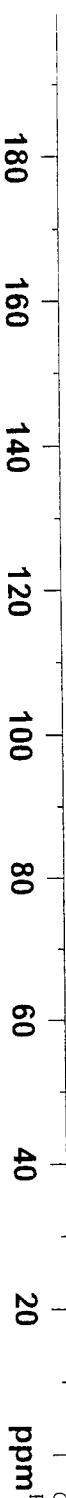

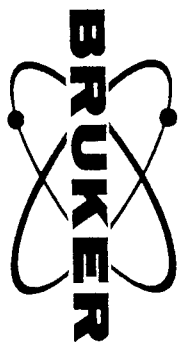

- 6.239
- 6.229
- 5.923
- 5.921
- 5.914
- 5.911
- 4.726
- 4.696
- 4.389
- 4.384
- 4.365
- 4.348
- 4.344
- 3.523
- 3.497
- 3.467
- 3.326
- 3.301
- 2.913
- 2.428
- 2.348
- 2.315
- 2.284
- 2.271
- 2.259
- 2.216
- 2.149
- 2.129
- 2.107
- 2.082
- 2.061
- 2.053
- 2.046
- 2.003
- 1.534

Current Data Parameters  
 NAME 16ADMT006034H  
 EXPNO 1  
 PROCNO 1

F2 - Acquisition Parameters

Date\_ 20070112  
 Time 17.10  
 INSTRUM spect  
 PROBHD 5 mm DUL 1H-13  
 PULPROG zg  
 TD 65536  
 SOLVENT CDC13  
 NS 8  
 DS 2  
 SWH 6218.905 Hz  
 FIDRES 0.094893 Hz  
 AQ 5.2691445 sec  
 RG 256  
 DW 80.400 usec  
 DE 6.00 usec  
 TE 300.0 K  
 D1 1.00000000 sec  
 TD0 1

==== CHANNEL F1 =====

NUC1 1H  
 P1 9.00 usec  
 PL1 1.00 dB  
 SFO1 300.3818550 MHz

F2 - Processing parameters

SI 32768  
 SF 300.3800013 MHz  
 WDW no  
 SSB 0  
 LB 0.00 Hz  
 GB 0  
 PC 1.00

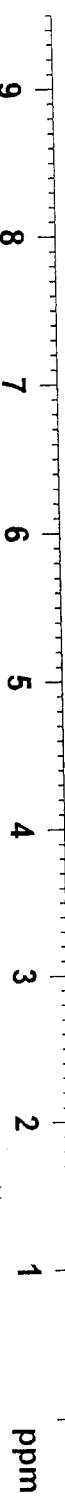

16ADMFT006052purifiedH CDC13/TMS 300MHz NMR301 1/30/06

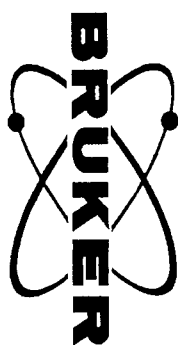

Current Data Parameters  
 NAME 16ADMFT006052purH  
 EXPNO 1  
 PROCNO 1

F2 - Acquisition Parameters  
 Date\_ 20070130  
 Time 11.26  
 INSTRUM spect  
 PROBHD 5 mm QNP 1H/1  
 PULPROG zg  
 TD 32768  
 SOLVENT CDC13  
 NS 8  
 DS 2  
 SWH 6172.839 Hz  
 FIDRES 0.188380 Hz  
 AQ 2.6542580 sec  
 RG 35.9  
 DW 81.000 usec  
 DE 6.00 usec  
 TE 300.0 K  
 D1 1.00000000  
 TD0 1

==== CHANNEL f1 =====  
 NUC1 1H  
 P1 7.00 usec  
 PL1 0.00 dB  
 SF01 300.0868531 MHz  
 F2 - Processing parameters  
 SI 16384  
 SF 300.0850064 MHz  
 WDW no  
 SSB 0  
 LB 0.00 Hz  
 GB 0  
 PC 1.00

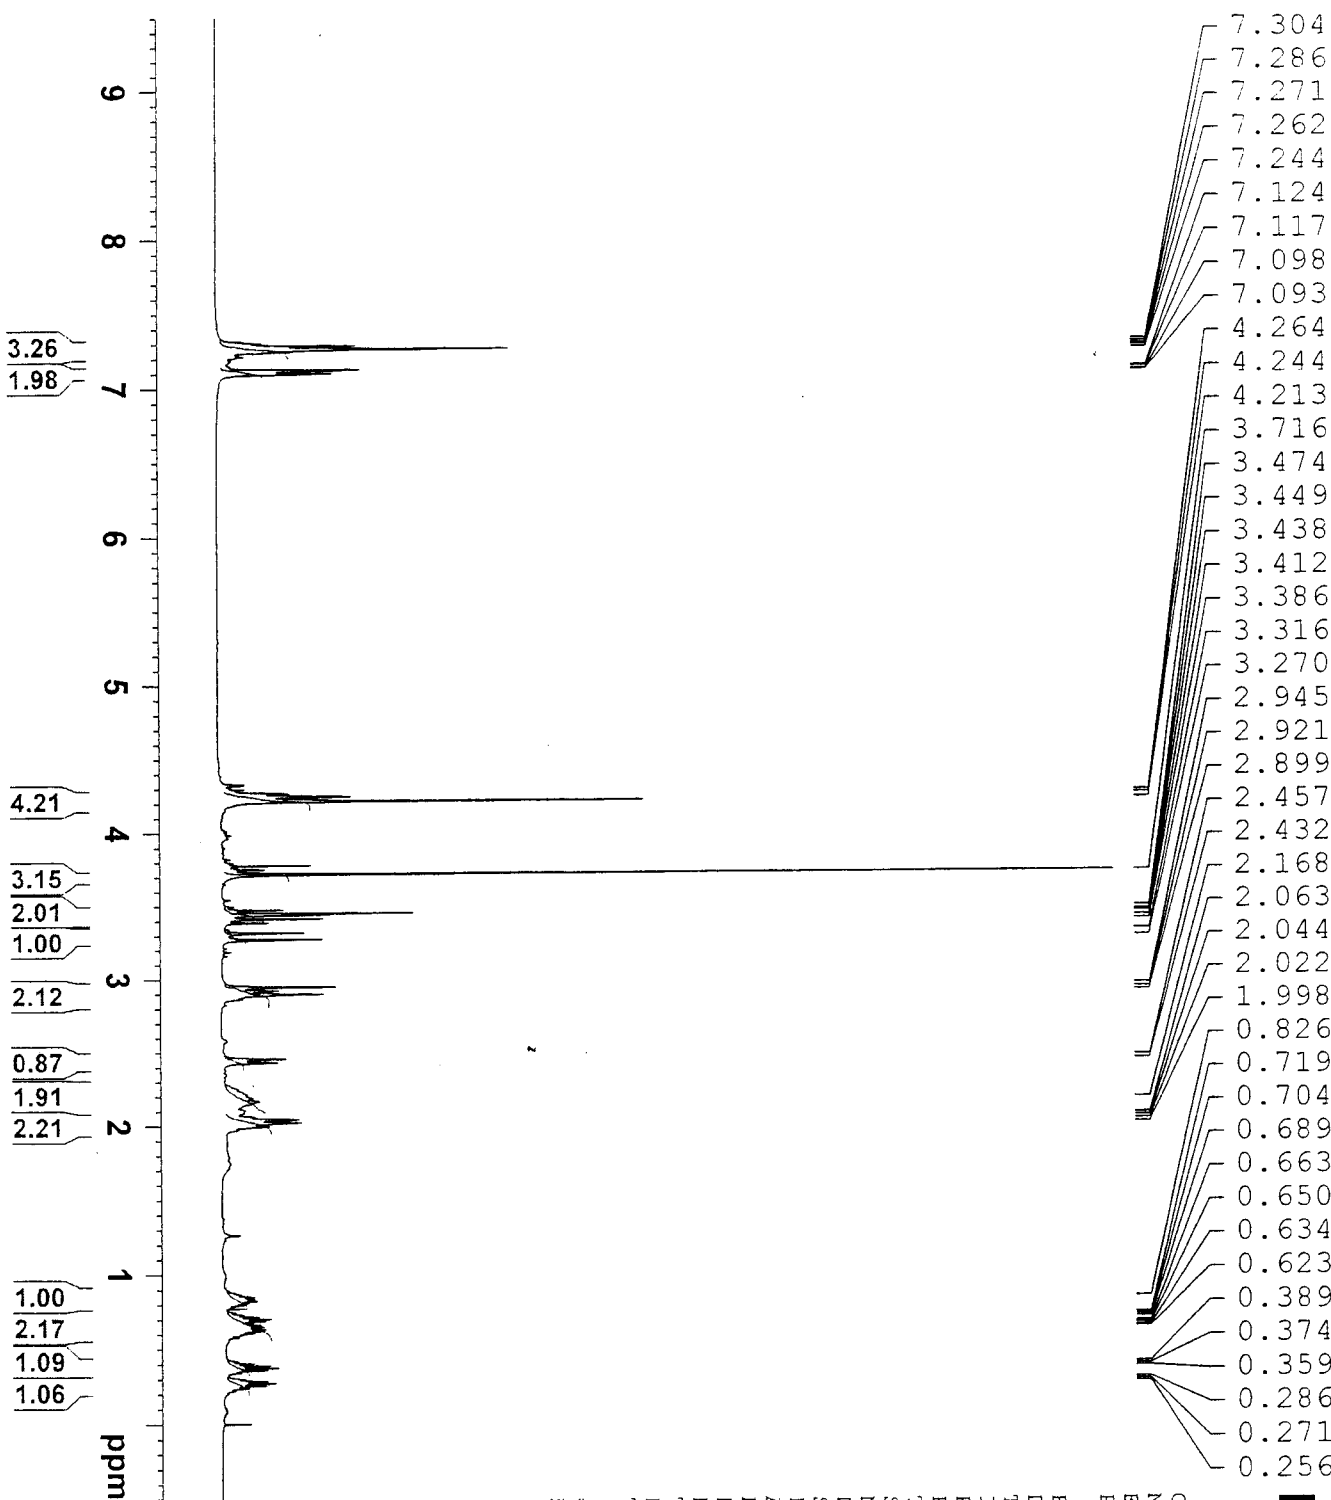

16ADMT006070H CDCl3/TMS 300MHz NMR301 1/25/07

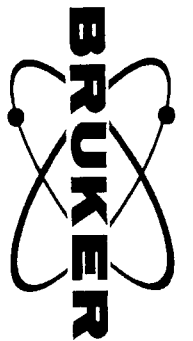

Current Data Parameters  
 NAME 16ADMT006070H  
 EXPNO 1  
 PROCNO 1

F2 - Acquisition Parameters

Date\_ 20070125  
 Time 11.14  
 INSTRUM spect  
 PROBHD 5 mm QNP 1H/1  
 PULPROG zg  
 TD 32768  
 SOLVENT CDCl3  
 NS 8  
 DS 2  
 SWH 6172.839 Hz  
 FIDRES 0.188380 Hz  
 AQ 2.6542580 sec  
 RG 71.8  
 DW 81.000 usec  
 DE 6.00 usec  
 TE 300.0 K  
 D1 1.00000000 sec  
 TD0 1

==== CHANNEL F1 =====  
 NUCL 1H  
 P1 7.00 usec  
 PL1 0.00 dB  
 SFO1 300.0868531 MHz

F2 - Processing parameters  
 SI 16384  
 SF 300.0850091 MHz  
 WDW no  
 SSB 0  
 LB 0.00 Hz  
 GB 0  
 PC 1.00

- 7.399
- 7.393
- 7.371
- 7.368
- 7.331
- 7.326
- 7.320
- 7.303
- 7.278
- 7.264
- 7.258
- 7.253
- 7.235
- 6.731
- 6.678
- 6.315
- 6.291
- 6.262
- 6.238
- 4.350
- 4.325
- 4.305
- 4.285
- 4.271
- 4.259
- 4.202
- 4.192
- 3.723
- 3.579
- 3.553
- 3.524
- 3.393
- 3.367
- 2.321
- 2.288
- 2.261
- 2.230
- 2.201
- 2.172
- 2.108
- 2.087
- 2.059
- 2.040
- 1.583

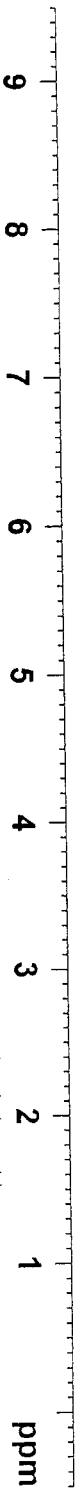

- 4.91
- 1.00
- 1.10
- 3.28
- 1.81
- 3.15
- 1.00
- 0.93
- 2.22
- 2.17
- 2.76



16ADMT006092purH CDC13/TMS 300MHz NMR301a 2/8/07

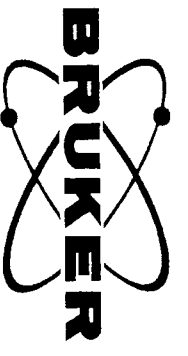

- 7.281
- 7.275
- 7.256
- 7.249
- 7.237
- 7.226
- 7.219
- 7.211
- 7.206
- 7.201
- 7.195
- 6.237
- 6.227
- 5.903
- 5.900
- 5.893
- 5.890
- 4.783
- 4.303
- 4.296
- 4.282
- 4.277
- 4.263
- 4.256
- 4.239
- 4.182
- 4.089
- 4.032
- 3.703
- 3.614
- 3.588
- 3.556
- 3.531
- 3.340
- 3.294
- 3.053
- 3.007
- 2.930
- 2.215
- 2.213
- 2.173
- 2.063
- 2.038
- 2.017

Current Data Parameters  
 NAME 16ADMT006092purH  
 EXPNO 1  
 PROCNO 1

F2 - Acquisition Parameters  
 Date\_ 20070208  
 Time\_ 17.03  
 INSTRUM spect  
 PROBHD 5 mm DUL 1H-13  
 PULPROG zg  
 TD 65536  
 SOLVENT CDC13  
 NS 8  
 DS 2  
 SMH 6218.905 Hz  
 FIDRES 0.094893 Hz  
 AQ 5.2691445 sec  
 RG 45.3  
 DW 80.400 usec  
 DE 6.00 usec  
 TE 300.0 K  
 D1 2.00000000 sec  
 TD0 1

==== CHANNEL f1 =====  
 NUC1 1H  
 P1 9.00 usec  
 PL1 1.00 dB  
 SFO1 300.3818550 MHz

F2 - Processing parameters  
 SI 32768  
 SF 300.3800033 MHz  
 WDW no  
 SSB 0  
 LB 0.00 Hz  
 GB 0  
 PC 1.00

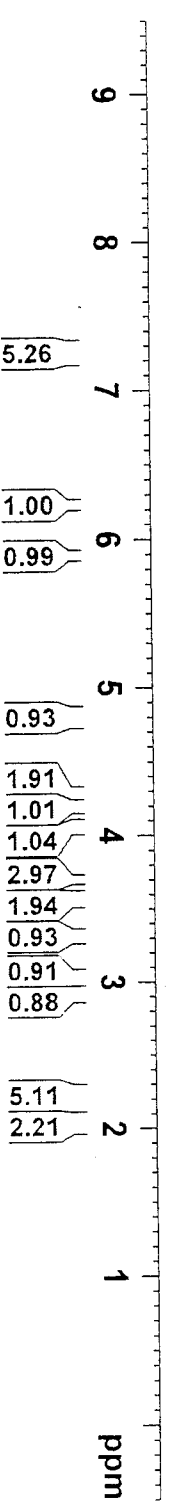

16ADMT006092C CDCl3/TMS 300MHz NMR301 2/22/07

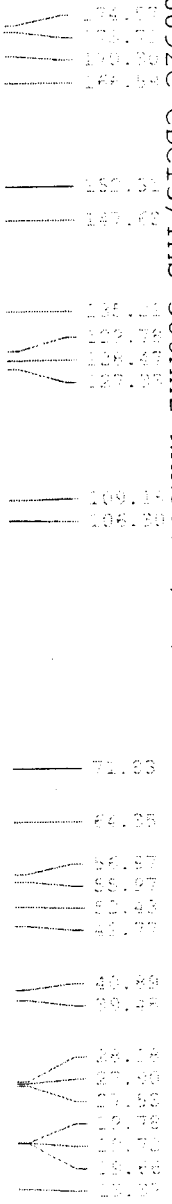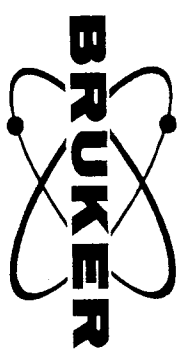

Current Data Parameters  
 NAME 16ADMT006092C  
 EXPNO 1  
 PROCNO 1

F2 - Acquisition Parameters  
 Date\_ 20070222  
 Time 16.50  
 INSTRUM spect  
 PROBHD 5 mm QNP 1H/1  
 PULPROG zgpg  
 TD 65536  
 SOLVENT CDCl3  
 NS 40  
 DS 2  
 SWH 17985.611 Hz  
 FIDRES 0.274439 Hz  
 AQ 1.8219508 sec  
 RG 13004  
 DW 27.800 usec  
 DE 6.00 usec  
 TE 300.0 K  
 D1 10.00000000 sec  
 d11 0.03000000 sec  
 DELTA 9.89999962 sec  
 TDO 1

==== CHANNEL F1 =====  
 NUC1 13C  
 P1 7.00 usec  
 PL1 0.00 dB  
 SFO1 75.4639789 MHz

==== CHANNEL F2 =====  
 CPDPRG2 waltz16  
 NUC2 1H  
 PCPD2 100.00 usec  
 PL2 0.00 dB  
 PL12 18.24 dB  
 PL13 18.24 dB  
 SFO2 300.0862003 MHz

F2 - Processing Parameters

SI 32768  
 SF 75.4564366 MHz  
 WDW EM  
 SSB 0  
 GB 0  
 PC 1.40

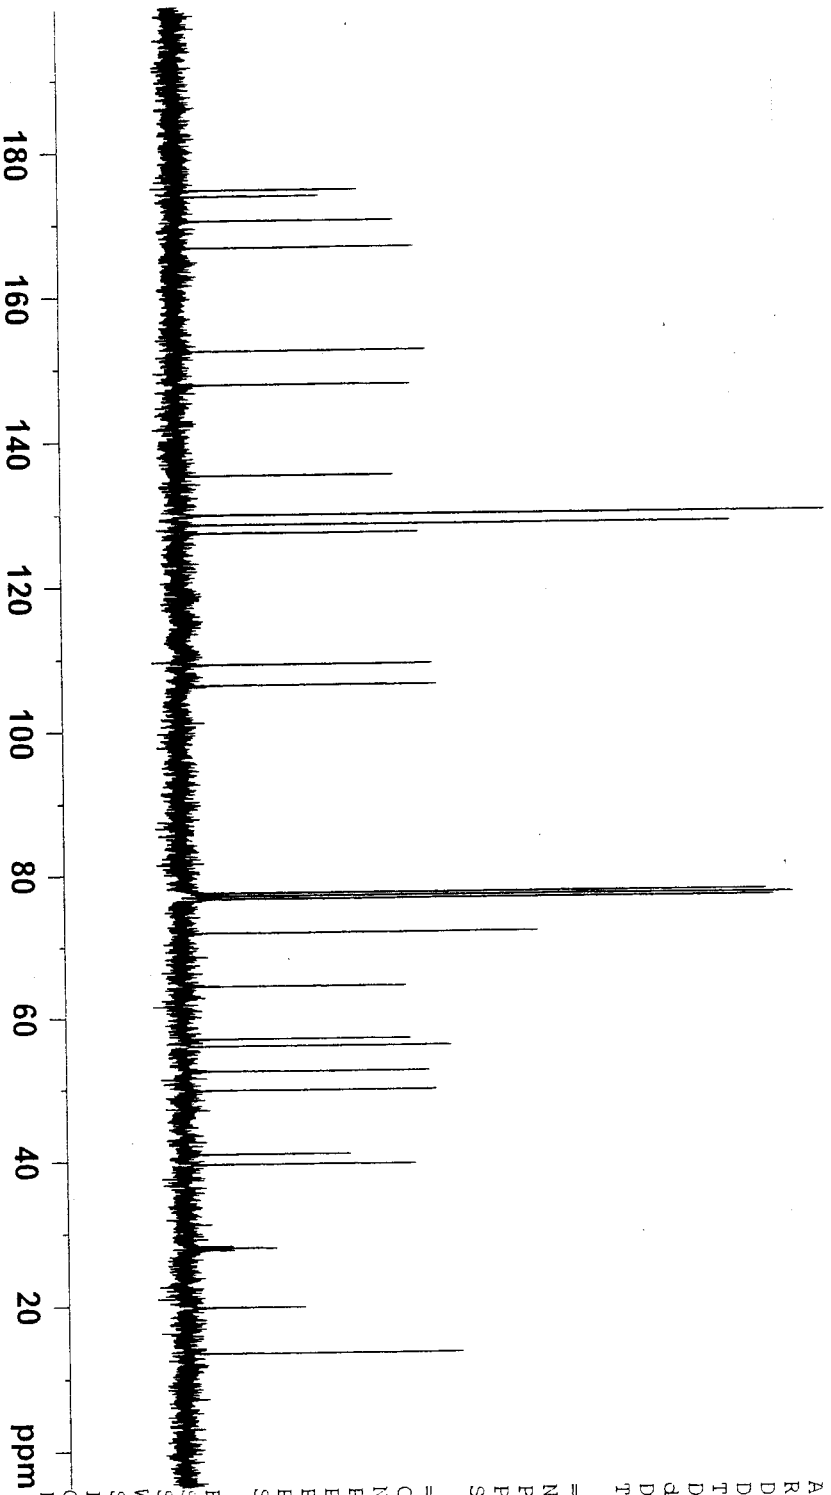

16ADMT006138H CDCl3/TMS 300MHz NMR301a 3/8/07

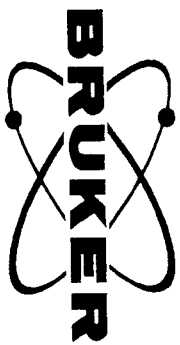

Current Data Parameters  
 NAME 16ADMT006138H  
 EXPNO 1  
 PROCNO 1

F2 - Acquisition Parameters

Date\_ 20070308  
 Time 17.46  
 INSTRUM spect  
 PROBHD 5 mm DUL 1H-13  
 PULPROG zg  
 TD 65536  
 SOLVENT CDCl3  
 NS 8  
 DS 2  
 SWH 6218.905 Hz  
 FIDRES 0.094893 Hz  
 AQ 5.2691445 sec  
 RG 32  
 DW 80.400 usec  
 DE 6.00 usec  
 TE 300.0 K  
 D1 2.00000000 sec  
 TD0 1

==== CHANNEL F1 =====  
 NUCL 1H  
 P1 9.00 usec  
 PL1 1.00 dB  
 SFO1 300.3818550 MHz

F2 - Processing parameters  
 SI 32768  
 SF 300.3800039 MHz  
 WDW no  
 SSB 0  
 LB 0.00 Hz  
 GB 0  
 PC 1.00

- 7.277
- 7.271
- 7.266
- 7.252
- 7.245
- 7.232
- 7.221
- 7.213
- 7.206
- 7.201
- 7.195
- 7.189
- 6.214
- 6.204
- 5.906
- 5.902
- 5.895
- 5.892
- 4.798
- 4.770
- 4.742
- 4.326
- 4.307
- 4.290
- 4.272
- 3.511
- 3.486
- 3.456
- 3.430
- 3.405
- 3.316
- 3.270
- 3.014
- 2.968
- 2.890
- 2.869
- 2.843
- 2.212
- 2.210
- 2.142
- 2.093
- 2.075
- 2.050
- 2.029

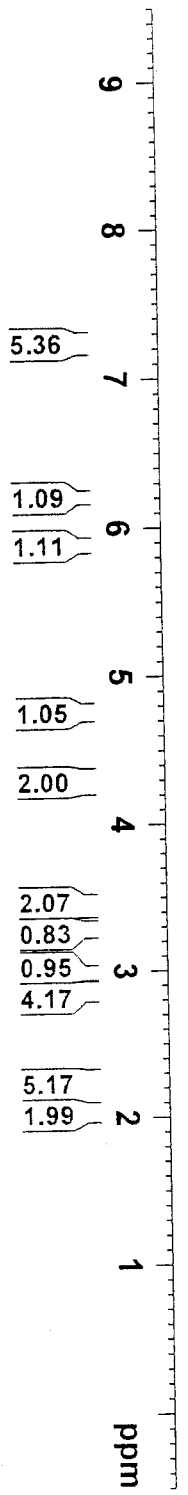

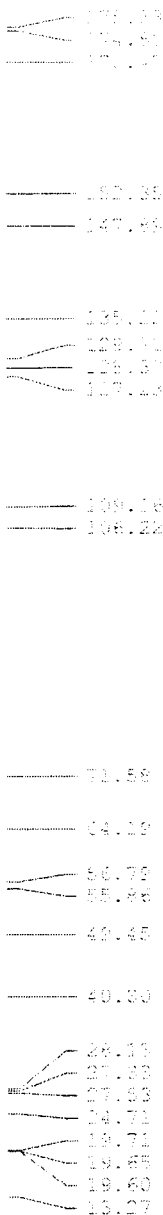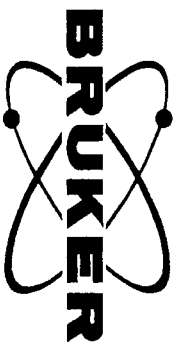

Current Data Parameters  
 NAME 16ADMT006138C  
 EXPNO 1  
 PROCNO 1

F2 - Acquisition Parameters  
 Date\_ 20070322  
 Time\_ 11.16  
 INSTRUM spect  
 PROBHD 5 mm QNP 1H/1  
 PULPROG zgpg  
 TD 65536  
 SOLVENT CDCl3  
 NS 16  
 DS 2  
 SWH 17985.611 Hz  
 FIDRES 0.274439 Hz  
 AQ 1.8219508 sec  
 RG 13004  
 DW 27.800 usec  
 DE 6.00 usec  
 TE 300.0 K  
 D1 10.00000000 sec  
 d11 0.03000000 sec  
 DELTA 9.89999962 sec  
 TDO 1

==== CHANNEL F1 =====  
 NUC1 13C  
 P1 7.00 usec  
 PL1 0.00 dB  
 SFO1 75.4639789 MHz

==== CHANNEL F2 =====  
 CPDPRG2 waltz16  
 NUC2 1H  
 PCPD2 100.00 usec  
 PL2 0.00 dB  
 PL12 18.24 dB  
 PL13 18.24 dB  
 SFO2 300.0862003 MHz

F2 - Processing parameters  
 SI 32768  
 SF 75.4564408 MHz  
 WDW EM  
 SSB 0  
 LB 1.00 Hz  
 GB 0  
 PC 1.40

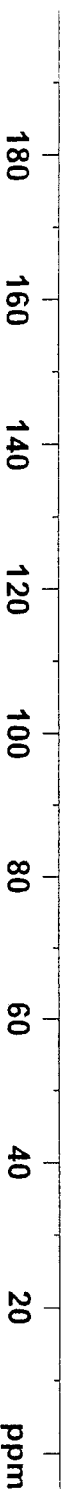

16ADMT006156H CDCl3/TMS 300MHz NMR301a

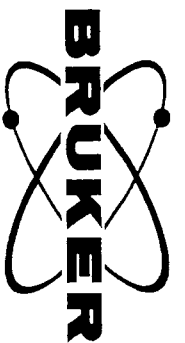

Current Data Parameters  
 NAME 16ADMT006156H  
 EXPNO 1  
 PROCNO 1

F2 - Acquisition Parameters

Date\_ 20070315  
 Time 10.51  
 INSTRUM spect  
 PROBHD 5 mm DUL IH-13  
 PULPROG zg  
 TD 65536  
 SOLVENT CDCl3  
 NS 8  
 DS 2  
 SWH 6218.905 Hz  
 FIDRES 0.094893 Hz  
 AQ 5.2691445 sec  
 RG 64  
 DW 80.400 usec  
 DE 6.00 usec  
 TE 300.0 K  
 D1 2.0000000 sec  
 TDO 1

==== CHANNEL f1 =====  
 NUC1 1H  
 P1 9.00 usec  
 PL1 1.00 dB  
 SFO1 300.3818550 MHz

F2 - Processing parameters  
 SI 32768  
 SF 300.380046 MHz  
 WDW no  
 SSB 0  
 LB 0.00 Hz  
 GB 0  
 PC 1.00

- 7.614
- 7.602
- 7.597
- 7.587
- 7.574
- 7.573
- 7.570
- 7.549
- 7.468
- 7.462
- 7.446
- 7.444
- 7.419
- 7.402
- 7.394
- 7.376
- 7.372
- 7.359
- 7.352
- 7.332
- 7.328
- 7.263
- 7.261
- 7.257
- 7.248
- 7.230
- 7.219
- 6.543
- 6.491
- 5.845
- 5.818
- 5.792
- 5.765
- 4.894
- 4.841
- 4.793
- 4.643
- 4.594
- 3.868
- 3.859
- 3.665
- 3.640
- 2.901
- 1.597

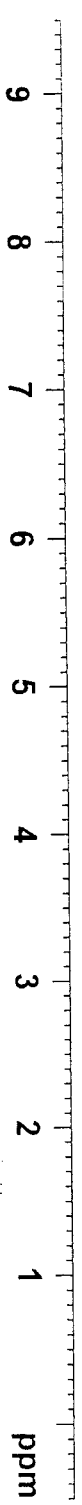

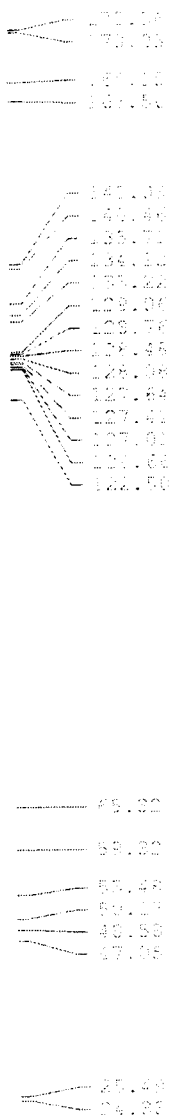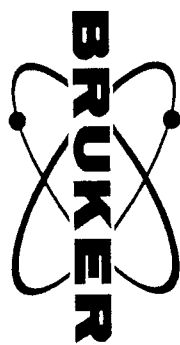

Current Data Parameters  
 NAME 16ADMT006156C  
 EXPNO 1  
 PROCNO 1

F2 - Acquisition Parameters  
 Date\_ 20070323  
 Time 17.36  
 INSTRUM spect  
 PROBHID 5 mm DUL 1H-13  
 PULPROG zgpg30  
 TD 65536  
 SOLVENT CDC13  
 NS 48  
 DS 4  
 SWH 18115.941 Hz  
 FIDRES 0.276427 Hz  
 AQ 1.8088436 sec  
 RG 32768  
 DW 27.600 usec  
 DE 6.00 usec  
 TE 300.0 K  
 D1 6.00000000 sec  
 d11 0.03000000 sec  
 DELTA 5.90000010 sec  
 TDO 1

==== CHANNEL F1 =====  
 NUCL 13C  
 P1 9.00 usec  
 PL1 1.80 dB  
 SFO1 75.5381641 MHz

==== CHANNEL F2 =====  
 CPDPRG2 waltz16  
 NUCL 1H  
 PCPD2 92.00 usec  
 PL2 0.00 dB  
 PL12 20.00 dB  
 PL13 20.00 dB  
 SFO2 300.3812015 MHz

F2 - Processing parameters

SI 65536  
 SF 75.5306174 MHz  
 WDW EM  
 SSB 0  
 LB 1.00 Hz  
 GB 0  
 PC 1.40

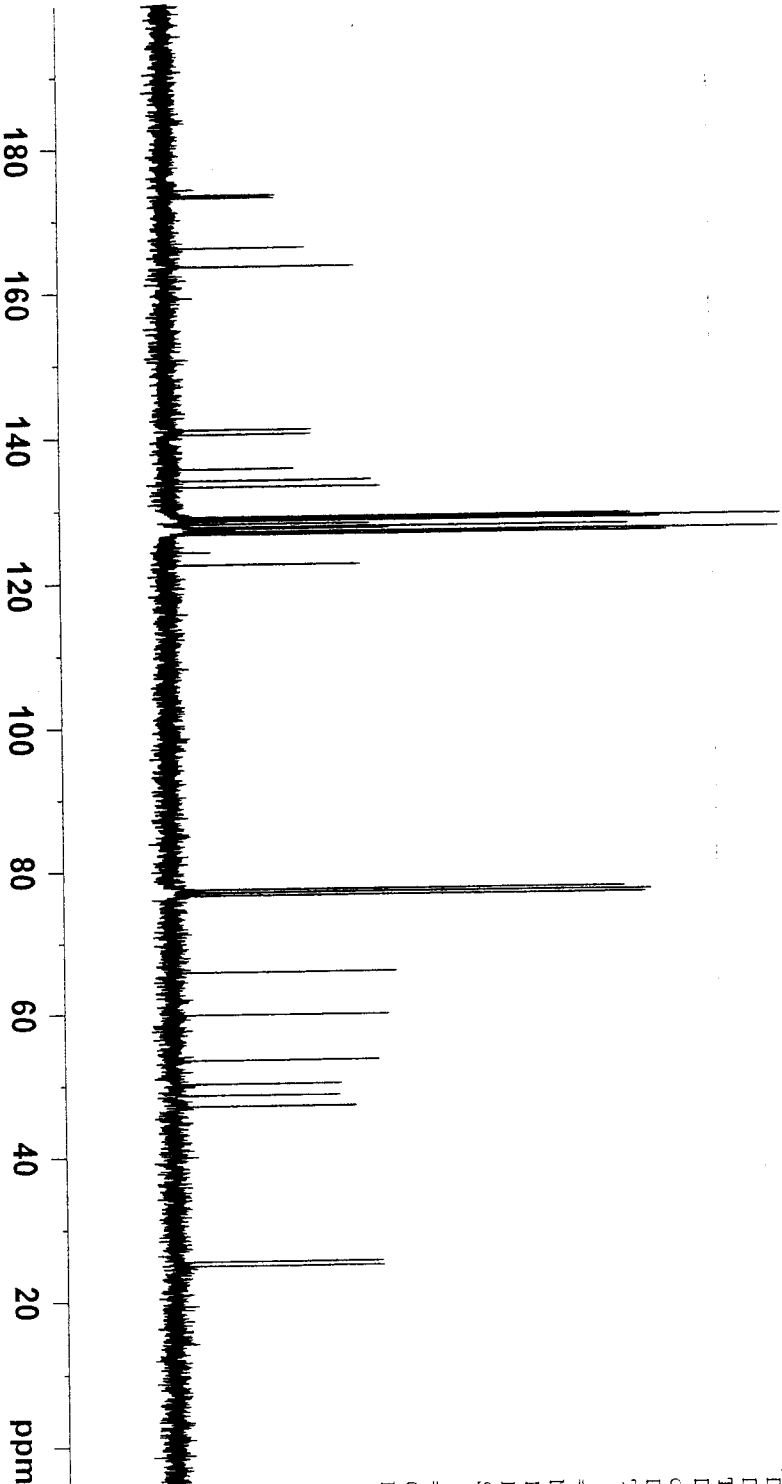

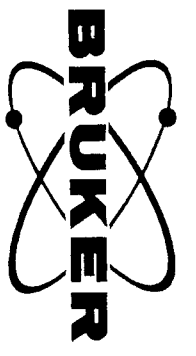

- 7.394
- 7.370
- 7.312
- 7.290
- 7.267
- 7.240
- 7.218
- 7.207
- 7.194
- 7.172
- 6.724
- 6.671
- 6.289
- 6.265
- 6.237
- 6.212
- 4.401
- 4.374
- 4.348
- 4.312
- 4.291
- 4.274
- 4.255
- 4.238
- 4.219
- 4.180
- 3.676
- 3.565
- 3.539
- 3.511
- 3.470
- 3.444
- 3.359
- 3.313
- 3.058
- 3.012
- 2.214
- 2.190
- 2.168
- 2.107
- 2.059
- 2.041
- 2.018
- 1.995

Current Data Parameters  
 NAME 16ADMT006164F2H  
 EXPNO 1  
 PROCNO 1

F2 - Acquisition Parameters  
 Date\_ 20070321  
 Time 10.40  
 INSTRUM spect  
 PROBHD 5 mm QNP 1H/1  
 PULPROG zg  
 TD 32768  
 SOLVENT CDCl3  
 NS 8  
 DS 2  
 SWH 6172.839 Hz  
 FIDRES 0.188380 Hz  
 AQ 2.6542580 sec  
 RG 40.3  
 DW 81.000 usec  
 DE 6.00 usec  
 TE 300.0 K  
 D1 1.00000000 sec  
 TD0 1

==== CHANNEL F1 =====  
 NUCL 1H  
 P1 7.00 usec  
 PL1 0.00 dB  
 SFO1 300.0868531 MHz

F2 - Processing parameters  
 SI 16384  
 SF 300.0850117 MHz  
 WDW no  
 SSB 0  
 LB 0.00 Hz  
 GB 0  
 PC 1.00

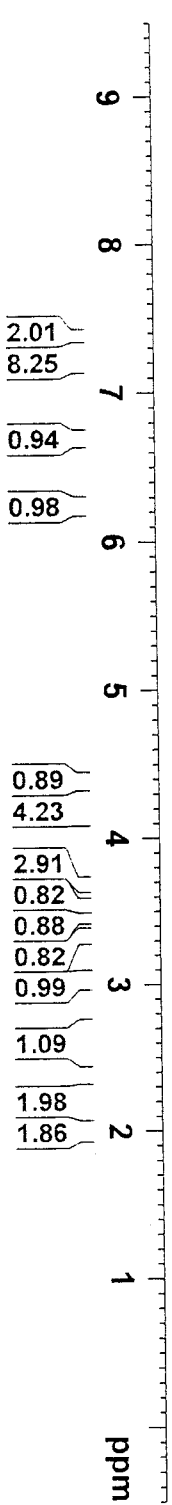

16ADMT006184H CDCl3/TMS 300MHz NMR301 4/5/07

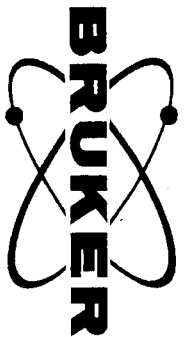

4.082  
4.070  
3.550  
3.525  
3.509  
3.457  
3.433  
3.421  
3.410  
3.387  
3.363  
3.339  
3.316  
2.974  
1.507  
1.015  
0.881  
0.870  
0.859  
0.848  
0.789  
0.775  
0.756  
0.739  
0.615  
0.604  
0.578  
0.561  
0.545  
0.530  
0.521  
0.512  
0.503  
0.495  
0.489  
0.476  
0.463  
0.456  
0.446  
0.439  
0.345  
0.330  
0.315  
0.298

Current Data Parameters  
NAME 16ADMT006184H  
EXPNO 1  
PROCNO 1

F2 - Acquisition Parameters

Date\_ 20070405  
Time 10.02  
INSTRUM spect  
PROBHD 5 mm QNP 1H/1  
PULPROG zg  
TD 32768  
SOLVENT CDCl3  
NS 8  
DS 2  
SWH 6172.839 Hz  
FIDRES 0.188380 Hz  
AQ 2.6542580 sec  
RG 50.8  
DW 81.000 usec  
DE 6.00 usec  
TE 300.0 K  
D1 1.00000000 sec  
TD0 1

==== CHANNEL F1 =====

NUC1 1H  
P1 7.00 usec  
PL1 0.00 dB  
SFO1 300.0868531 MHz

F2 - Processing parameters

SI 16384  
SF 300.0849929 MHz  
WDW no  
SSB 0  
LB 0.00 Hz  
GB 0  
PC 1.00

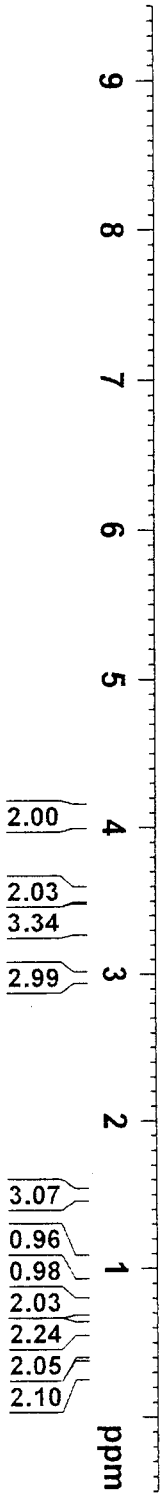



16ADMT006184C CDC13/TMS 75MHz NMR301a 4/6/07

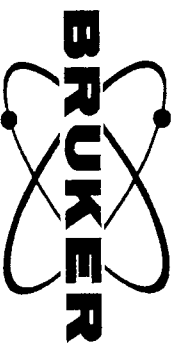

Current Data Parameters  
 NAME 16ADMT006184C  
 EXPNO 1  
 PROCNO 1

F2 - Acquisition Parameters

Date\_ 20070406  
 Time\_ 15.18  
 INSTRUM spect  
 PROBHD 5 mm DUL 1H-13  
 PULPROG zgpg  
 TD 65536  
 SOLVENT CDC13  
 NS 26  
 DS 4  
 SWH 18115.941 Hz  
 FIDRES 0.2276427 Hz  
 AQ 1.8088436 sec  
 RG 32768  
 DW 27.600 usec  
 DE 6.00 usec  
 TE 300.0 K  
 D1 6.00000000 sec  
 d11 0.03000000 sec  
 DELTA 5.90000010 sec  
 TDO 1

==== CHANNEL F1 =====  
 NUC1 13C  
 P1 9.00 usec  
 PL1 1.80 dB  
 SFO1 75.5381641 MHz

==== CHANNEL F2 =====  
 CPDPRG2 waltz16  
 NUC2 1H  
 PCPD2 92.00 usec  
 PL2 0.00 dB  
 PL12 20.00 dB  
 PL13 20.00 dB  
 SFO2 300.3812015 MHz

F2 - Processing parameters  
 SI 65536  
 SF 75.5306175 MHz  
 WDW EM  
 SSB 0  
 LB 1.00 Hz  
 GB 0  
 PC 1.40

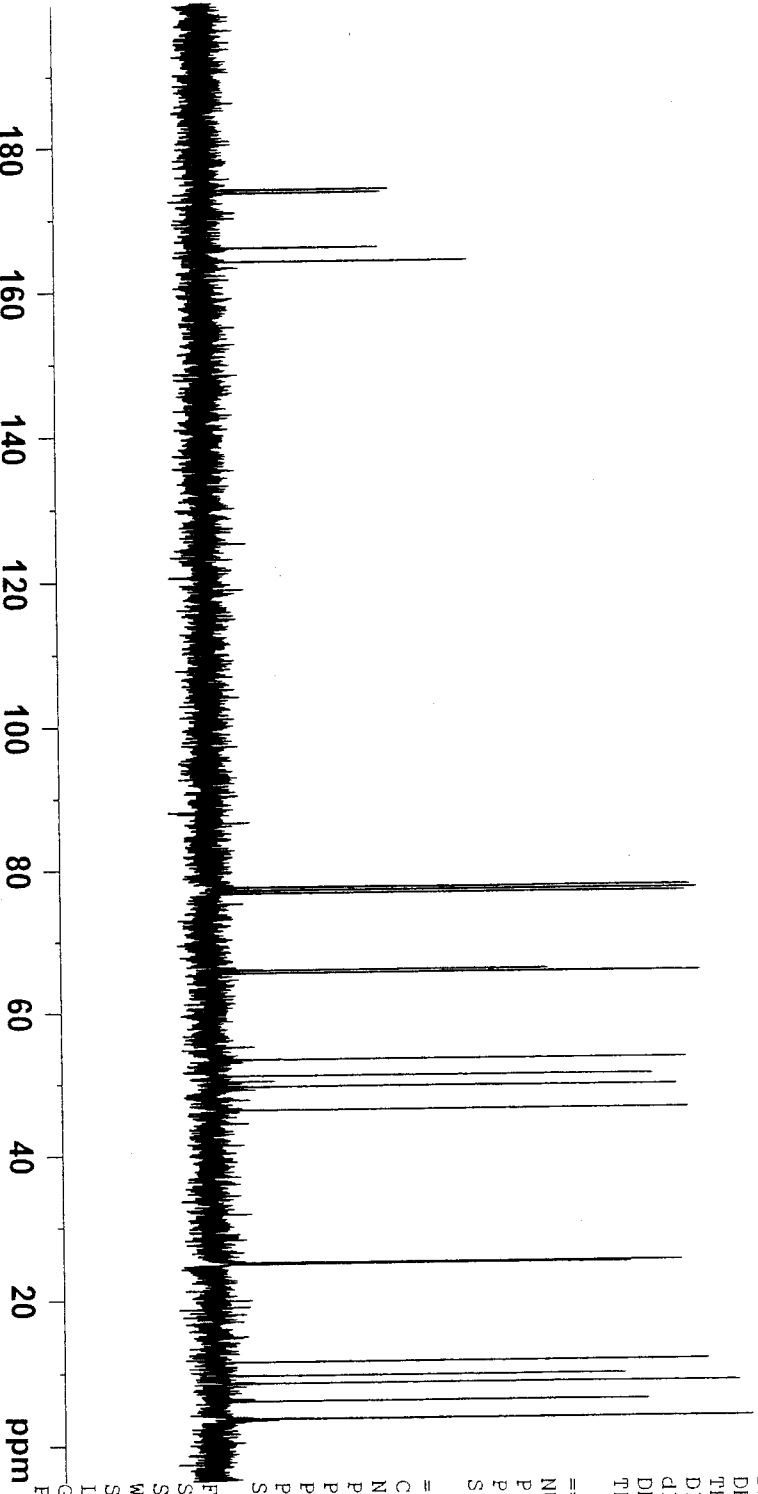

16ADMT006190F2H CDC13/TMS 300MHz NM301 4/12/07

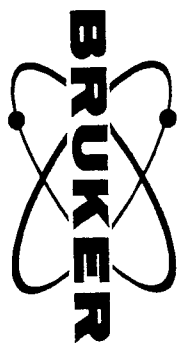

- 7.364
- 7.362
- 7.357
- 7.345
- 7.335
- 7.329
- 7.321
- 7.314
- 7.306
- 7.300
- 7.296
- 7.284
- 4.749
- 4.701
- 4.607
- 4.559
- 3.865
- 3.805
- 3.781
- 3.581
- 3.557
- 3.528
- 3.505
- 3.384
- 3.354
- 2.981
- 1.508
- 0.815
- 0.745
- 0.737
- 0.732
- 0.725
- 0.719
- 0.713
- 0.703
- 0.698
- 0.689
- 0.479
- 0.456
- 0.447
- 0.431
- 0.427
- 0.419
- 0.408

Current Data Parameters  
 NAME 16ADMT006190F2H  
 EXPNO 1  
 PROCNO 1

F2 - Acquisition Parameters  
 Date\_ 20070412  
 Time 9.59  
 INSTRUM spect  
 PROBHD 5 mm QNP 1H/1  
 PULPROG zg  
 TD 32768  
 SOLVENT CDC13  
 NS 8  
 DS 2  
 SWH 6172.839 Hz  
 FIDRES 0.188380 Hz  
 AQ 2.6542580 sec  
 RG 40.3  
 DW 81.000 usec  
 DE 6.00 usec  
 TE 300.0 K  
 D1 1.00000000 sec  
 TD0 1

===== CHANNEL f1 =====  
 NUCL1 1H  
 P1 7.00 usec  
 PL1 0.00 dB  
 SFO1 300.0868531 MHz  
 F2 - Processing parameters  
 SI 16384  
 SF 300.0849970 MHz  
 WDM no  
 SSB 0  
 LB 0.00 Hz  
 GB 0  
 PC 1.00

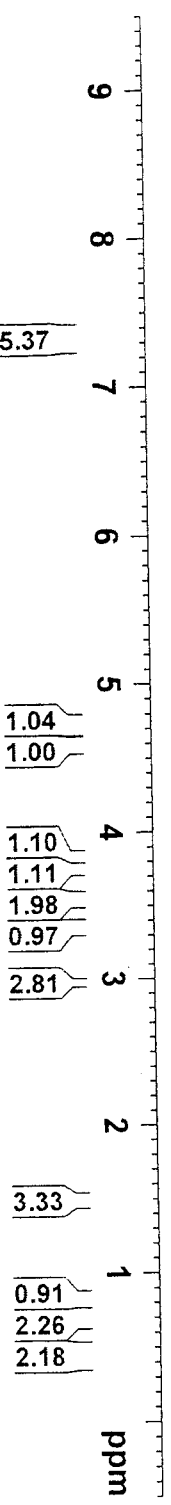

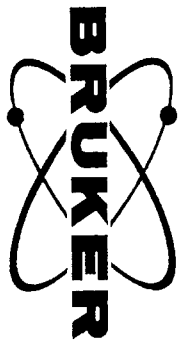

Current Data Parameters  
 NAME 16ADMT006190F2C3  
 EXPNO 1  
 PROCNO 1

F2 - Acquisition Parameters

Date\_ 20070423  
 Time 15.34  
 INSTRUM spect  
 PROBHD 5 mm QNP 1H/1  
 PULPROG zgpg9  
 TD 65536  
 SOLVENT CDCl3  
 NS 27  
 DS 2  
 SWH 17985.611 Hz  
 FIDRES 0.274439 Hz  
 AQ 1.8219508 sec  
 RG 13004  
 DW 27.800 usec  
 DE 6.00 usec  
 TE 300.0 K  
 D1 10.00000000 sec  
 d11 0.03000000 sec  
 DELTA 9.89999962 sec  
 TDO 1

==== CHANNEL f1 =====  
 NUC1 13C  
 P1 7.00 usec  
 PL1 0.00 dB  
 SFO1 75.4639789 MHz

==== CHANNEL f2 =====  
 CPDPRG2 waltz16  
 NUC2 1H  
 PCPD2 100.00 usec  
 PL2 0.00 dB  
 PL12 18.24 dB  
 PL13 18.24 dB  
 SFO2 300.0862003 MHz

F2 - Processing parameters

SI 32768  
 SF 75.4564402 MHz  
 WDM EM  
 SSB 0  
 LB 1.00 Hz  
 GB 0  
 PC 1.40

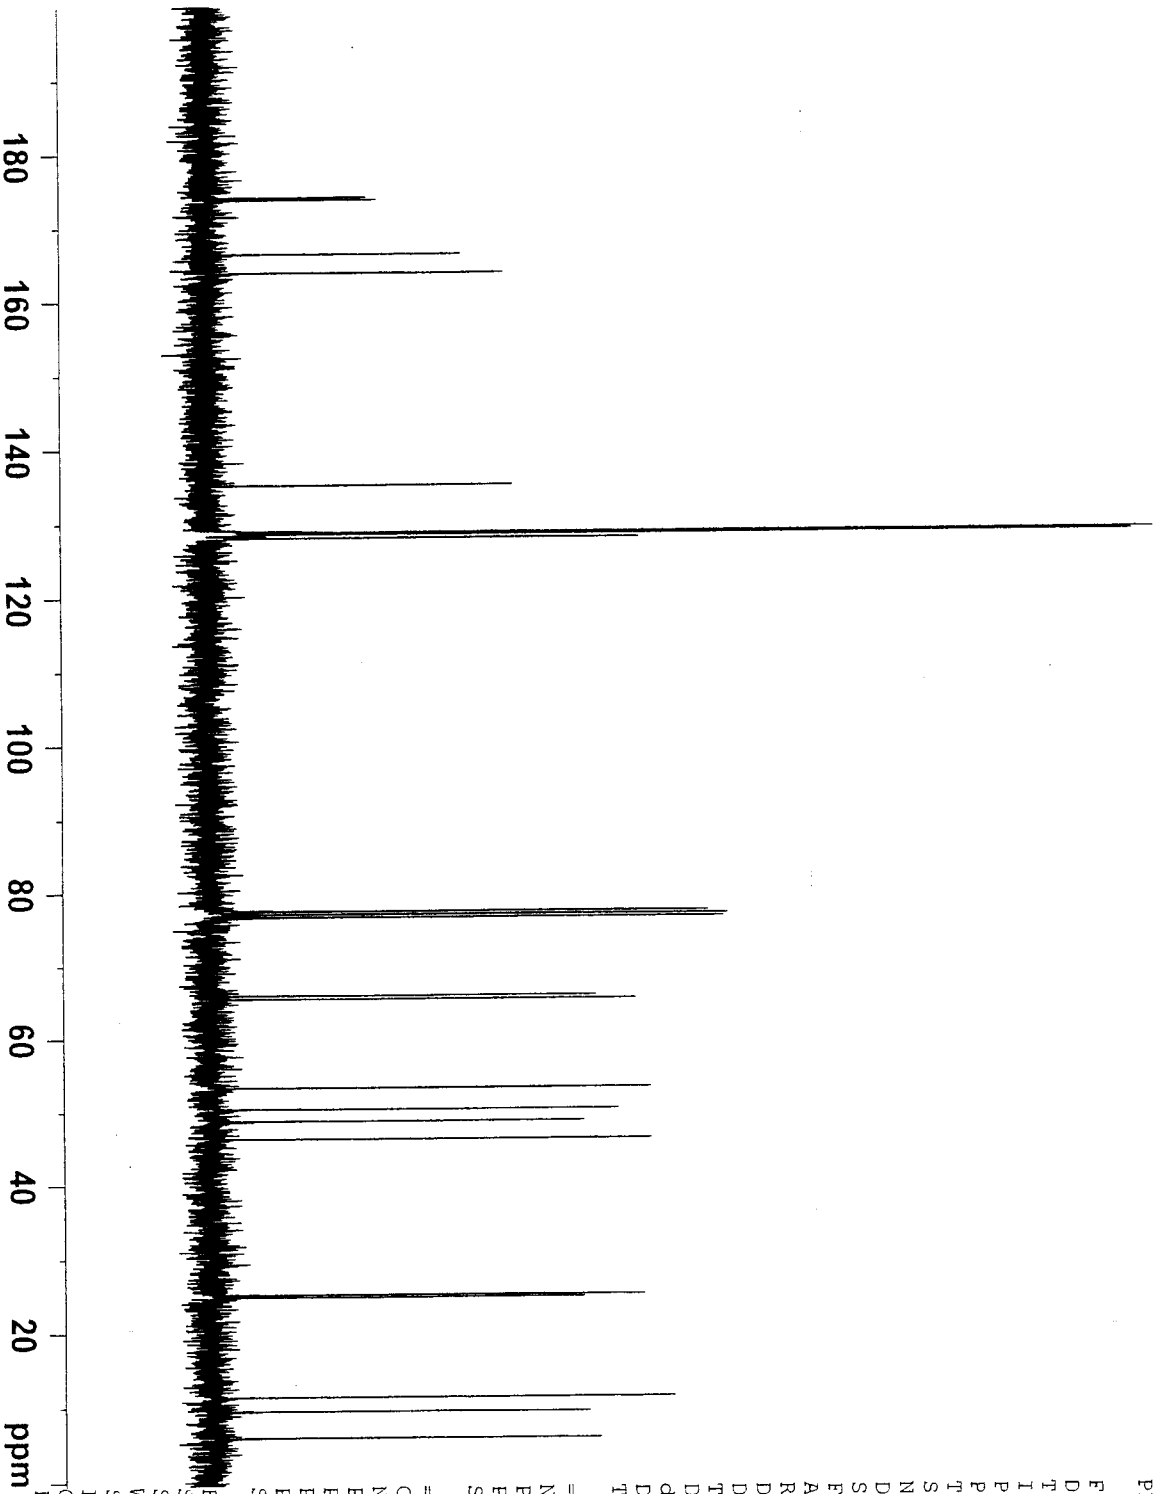

16ADMT006200AH CDCl3/TMS 300MHz NMR301a 4/5/07

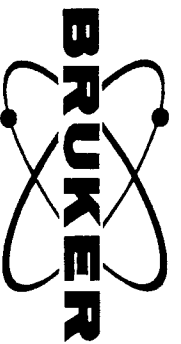

- 7.458
- 7.435
- 7.410
- 7.408
- 7.391
- 7.386
- 7.382
- 7.370
- 7.362
- 7.342
- 7.338
- 7.322
- 7.319
- 7.309
- 7.299
- 7.292
- 7.286
- 7.274
- 7.269
- 7.251
- 7.242
- 4.636
- 4.623
- 3.881
- 3.821
- 3.808
- 3.798
- 3.784
- 3.738
- 3.702
- 3.678
- 3.670
- 3.645
- 3.510
- 3.479
- 3.447
- 1.499
- 0.880
- 0.789
- 0.771
- 0.755
- 0.742
- 0.726
- 0.507

Current Data Parameters  
 NAME 16ADMT006200AH  
 EXPNO 1  
 PROCNO 1

F2 - Acquisition Parameters

Date\_ 20070405  
 Time\_ 14.02  
 INSTRUM spect  
 PROBHD 5 mm DUL 1H-13  
 PULPROG zg  
 TD 65536  
 SOLVENT CDCl3  
 NS 8  
 DS 2  
 SWH 6218.905 Hz  
 FIDRES 0.094893 Hz  
 AQ 5.2691445 sec  
 RG 32  
 DW 80.400 usec  
 DE 6.00 usec  
 TE 300.0 K  
 D1 2.00000000 sec  
 TDO 1

==== CHANNEL f1 =====

NUC1 1H  
 P1 9.00 usec  
 PL1 1.00 dB  
 SFO1 300.3818550 MHz

F2 - Processing parameters

SI 32768  
 SF 300.3799980 MHz  
 WDM no  
 SSB 0  
 LB 0.00 Hz  
 GB 0  
 PC 1.00

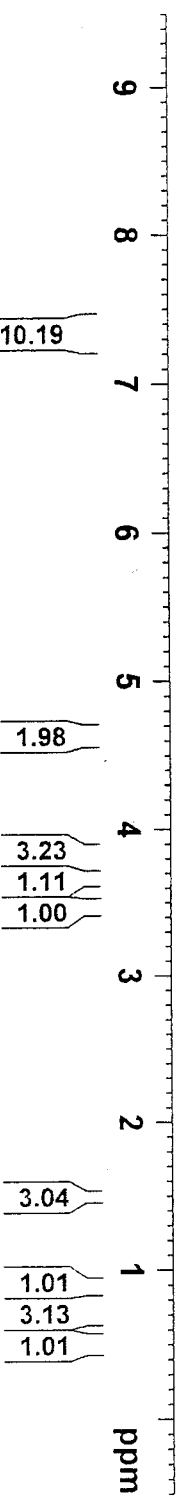

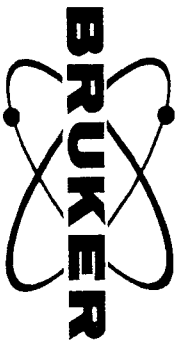

Current Data Parameters  
 NAME 16ADMT006200F2C  
 EXPNO 1  
 PROCNO 1

F2 - Acquisition Parameters  
 Date\_ 20070425  
 Time 10.03  
 INSTRUM spect  
 PROBHD 5 mm QNP 1H/1  
 PULPROG zgpg  
 TD 65536  
 SOLVENT CDC13  
 NS 24  
 DS 2  
 SWH 17985.611 Hz  
 FIDRES 0.274439 Hz  
 AQ 1.8219508 sec  
 RG 13004  
 DW 27.800 usec  
 DE 6.00 usec  
 TE 300.0 K  
 D1 8.00000000 sec  
 d11 0.03000000 sec  
 DELTA 7.90000010 sec  
 TD0 1

==== CHANNEL F1 =====  
 NUCl 13C  
 P1 7.00 usec  
 PL1 0.00 dB  
 SFO1 75.4639789 MHz

==== CHANNEL F2 =====  
 CPDPRG2 waltz16  
 NUCl 1H  
 PCPD2 100.00 usec  
 PL2 0.00 dB  
 PL12 18.24 dB  
 PL13 18.24 dB  
 SFO2 300.0862003 MHz

F2 - Processing parameters  
 SI 32768  
 SF 75.4564523 MHz  
 WDM EM  
 SSB 0  
 LB 1.00 Hz  
 GB 0  
 PC 1.40

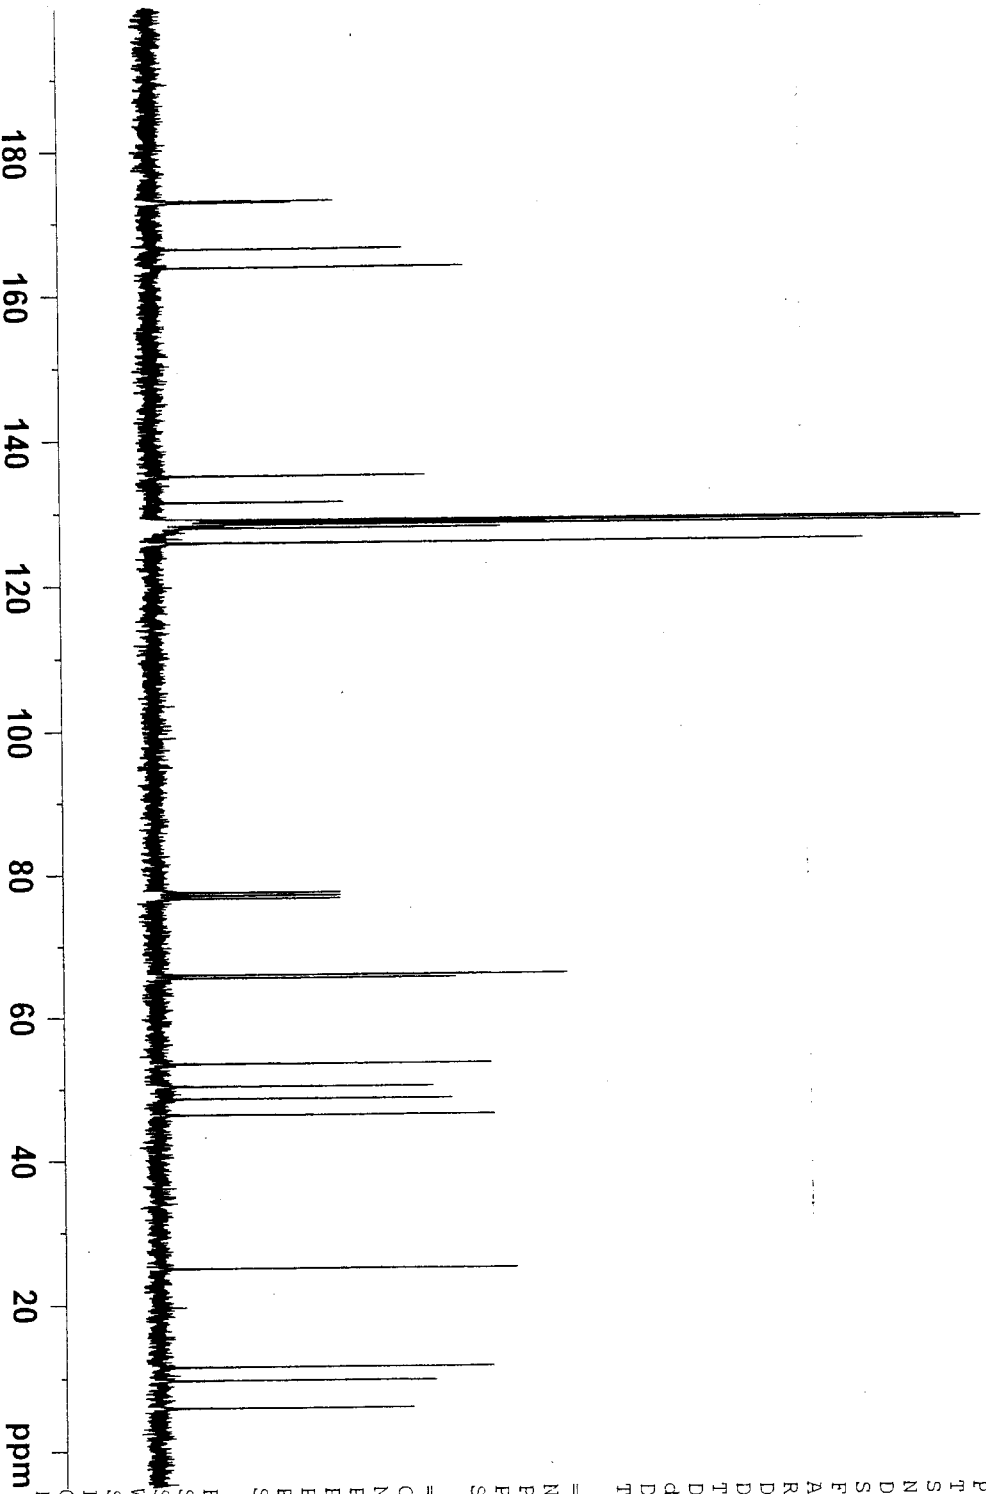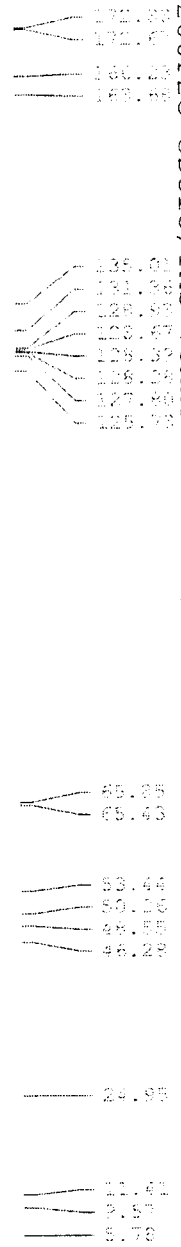

16ADMT006212H CDCl3/TMS 300MHz NMR301a 4/23/07

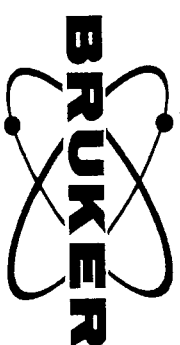

- 7.308
- 7.288
- 7.282
- 7.270
- 7.118
- 7.107
- 7.105
- 7.100
- 7.096
- 7.090
- 7.086
- 6.694
- 6.641
- 6.098
- 6.070
- 6.045
- 6.017
- 5.070
- 4.107
- 4.100
- 3.842
- 3.828
- 3.819
- 3.805
- 3.550
- 3.526
- 3.503
- 3.480
- 3.268
- 3.245
- 3.222
- 3.198
- 1.601
- 1.015
- 0.990
- 0.974
- 0.964
- 0.603
- 0.583
- 0.557
- 0.540
- 0.304
- 0.288
- 0.270

Current Data Parameters  
 NAME 16ADMT006212H  
 EXPNO 1  
 PROCNO 1

F2 - Acquisition Parameters  
 Date\_ 20070423  
 Time 10.19  
 INSTRUM spect  
 PROBHD 5 mm DUL 1H-13  
 PULPROG zg  
 TD 65536  
 SOLVENT CDCl3  
 NS 8  
 DS 2  
 SMH 6218.905 Hz  
 FIDRES 0.094893 Hz  
 AQ 5.2691445 sec  
 RG 64  
 DW 80.400 usec  
 DE 6.00 usec  
 TE 300.0 K  
 D1 2.00000000 sec  
 TD0 1

==== CHANNEL F1 =====  
 NUC1 1H  
 P1 9.00 usec  
 PL1 1.00 dB  
 SFO1 300.3818550 MHz  
 F2 - Processing parameters  
 SI 32768  
 SF 300.3799997 MHz  
 WDW no  
 SSB 0  
 LB 0.00 Hz  
 GB 0  
 PC 1.00

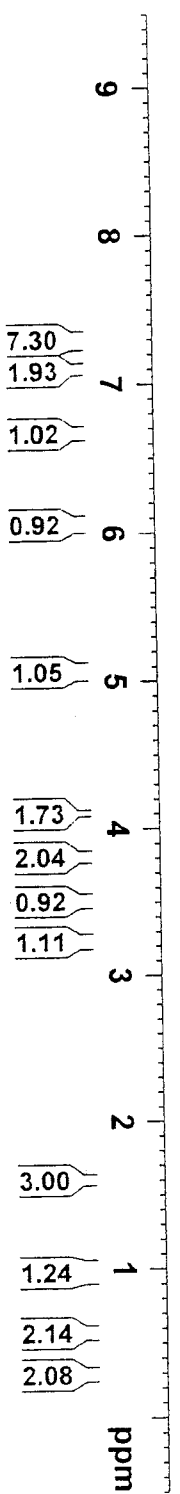

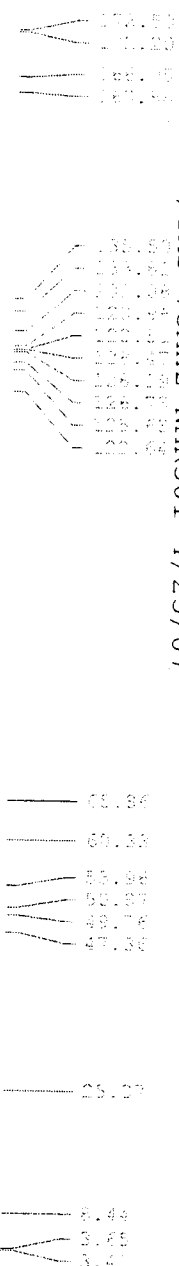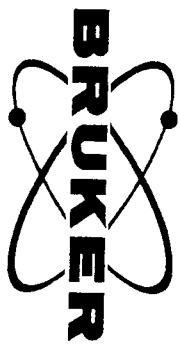

Current Data Parameters  
 NAME 16ADMT006212C  
 EXPNO 1  
 PROCNO 1

F2 - Acquisition Parameters  
 Date\_ 20070425  
 Time\_ 10.15  
 INSTRUM spect  
 PROBHD 5 mm QNP 1H/1  
 PULPROG zgpg  
 TD 65536  
 SOLVENT CDC13  
 NS 42  
 DS 2  
 SWH 17985.611 Hz  
 FIDRES 0.274439 Hz  
 AQ 1.8219508 sec  
 RG 13004  
 DW 27.800 usec  
 DE 6.00 usec  
 TE 300.0 K  
 D1 8.00000000 sec  
 d11 0.03000000 sec  
 DELTA 7.90000010 sec  
 TD0 1

==== CHANNEL F1 =====  
 NUC1 13C  
 P1 7.00 usec  
 PL1 0.00 dB  
 SFO1 75.4639789 MHz

==== CHANNEL F2 =====  
 CPDPRG2 waltz16  
 NUC2 1H  
 PCPD2 100.00 usec  
 PL2 0.00 dB  
 PL12 18.24 dB  
 PL13 18.24 dB  
 SFO2 300.0862003 MHz

F2 - Processing Parameters  
 SI 32768  
 SF 75.4564395 MHz  
 WDW EM  
 SSB 0  
 LB 1.00 Hz  
 GB 0  
 PC 1.40

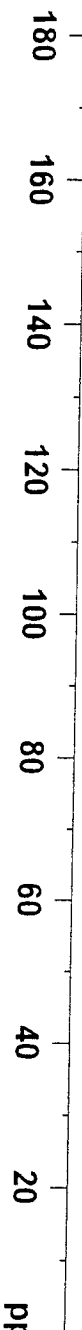

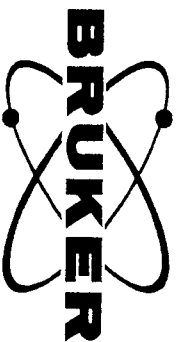

- 7.356
- 7.328
- 7.308
- 7.301
- 7.295
- 7.288
- 7.284
- 7.281
- 7.276
- 7.273
- 7.266
- 7.260
- 7.250
- 7.243
- 7.233
- 7.219
- 7.214
- 7.125
- 7.120
- 7.115
- 7.110
- 7.104
- 7.096
- 7.092
- 6.628
- 6.575
- 6.058
- 6.031
- 6.005
- 5.978
- 5.016
- 4.732
- 4.684
- 4.618
- 4.570
- 3.863
- 3.839
- 3.822
- 3.818
- 3.812
- 3.793
- 3.785
- 3.761
- 1.563

Current Data Parameters  
 NAME 16ADMT006218H  
 EXPNO 1  
 PROCNO 1

F2 - Acquisition Parameters

Date 20070423  
 Time 13.46  
 INSTRUM spect  
 PROBHD 5 mm QNP 1H/1  
 PULPROG zg  
 TD 32768  
 SOLVENT CDC13  
 NS 8  
 DS 2  
 SWH 6172.839 Hz  
 FIDRES 0.188380 Hz  
 AQ 2.6542580 sec  
 RG 35.9  
 DW 81.000 usec  
 DE 6.00 usec  
 TE 300.0 K  
 D1 1.00000000 sec  
 TD0 1

==== CHANNEL F1 =====

NUC1 1H  
 P1 7.00 usec  
 PL1 0.00 dB  
 SFO1 300.0868531 MHz

F2 - Processing parameters

SI 16384  
 SF 300.0850076 MHz  
 WDW no  
 SSB 0  
 LB 0.00 Hz  
 GB 0  
 PC 1.00

- 13.26
- 2.02
- 1.10
- 1.05
- 0.89
- 1.00
- 1.07
- 4.06
- 2.94

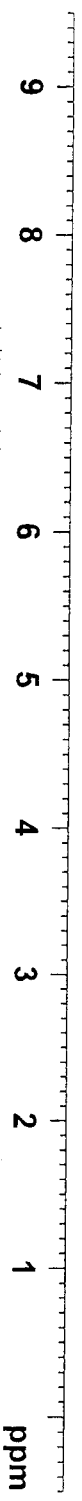



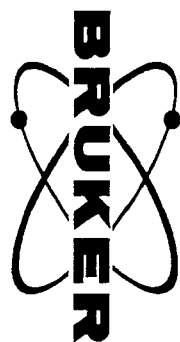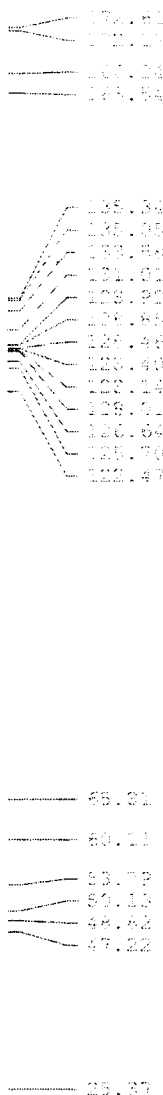

Current Data Parameters  
 NAME 16ADMT006218C  
 EXPNO 1  
 PROCNO 1

F2 - Acquisition Parameters  
 Date\_ 20070425  
 Time\_ 17.11  
 INSTRUM spect  
 PROBHD 5 mm DUL IH-13  
 PULPROG zgpg  
 TD 65536  
 SOLVENT CDC13  
 NS 56  
 DS 4  
 SWH 18115.941 Hz  
 FIDRES 0.276427 Hz  
 AQ 1.8088436 sec  
 RG 32768  
 DW 27.600 usec  
 DE 6.00 usec  
 TE 300.0 K  
 D1 8.00000000 sec  
 d11 0.03000000 sec  
 DELTA 7.90000010 sec  
 TD0 1

==== CHANNEL F1 =====  
 NUC1 13C  
 P1 9.00 usec  
 PL1 1.80 dB  
 SFO1 75.5381641 MHz

==== CHANNEL F2 =====  
 CPDPRG2 waltz16  
 NUC2 1H  
 PCPD2 92.00 usec  
 PL2 0.00 dB  
 PL12 20.00 dB  
 PL13 20.00 dB  
 SFO2 300.3812015 MHz

F2 - Processing parameters

SI 65536  
 SF 75.5306236 MHz  
 MDM EM  
 SSB 0  
 LB 1.00 Hz  
 GB 0  
 PC 1.40

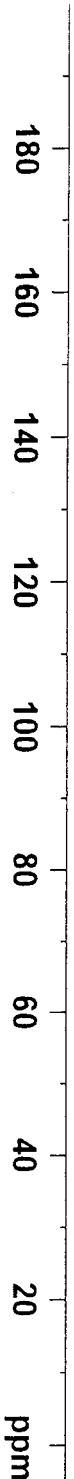

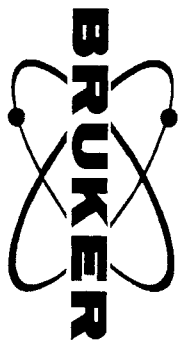

- 7.293
- 7.280
- 7.253
- 7.241
- 7.226
- 6.596
- 6.543
- 5.868
- 5.840
- 5.815
- 5.787
- 4.946
- 4.916
- 4.886
- 4.085
- 3.686
- 3.663
- 3.654
- 3.630
- 3.596
- 3.573
- 3.536
- 3.512
- 3.489
- 3.465
- 3.323
- 3.299
- 3.276
- 3.252
- 2.887
- 1.578
- 1.014
- 0.997
- 0.988
- 0.629
- 0.612
- 0.608
- 0.585
- 0.581
- 0.351
- 0.335
- 0.330
- 0.320
- 0.300

Current Data Parameters  
 NAME 16ADMT006168H  
 EXPNO 1  
 PROCNO 1

F2 - Acquisition Parameters  
 Date\_ 20070322  
 Time\_ 11.24  
 INSTRUM spect  
 PROBHD 5 mm QNP 1H/1  
 PULPROG zg  
 TD 32768  
 SOLVENT CDCl3  
 NS 8  
 DS 2  
 SWH 6172.839 Hz  
 FIDRES 0.188380 Hz  
 AQ 2.6542580 sec  
 RG 128  
 DW 81.000 usec  
 DE 6.00 usec  
 TE 300.0 K  
 D1 1.00000000 sec  
 TD0 1

==== CHANNEL F1 =====  
 NUC1 1H  
 P1 7.00 usec  
 PL1 0.00 dB  
 SFO1 300.0868531 MHz

F2 - Processing Parameters  
 SI 16384  
 SF 300.0849981 MHz  
 WDW no  
 SSB 0  
 LB 0.00 Hz  
 GB 0  
 PC 1.00

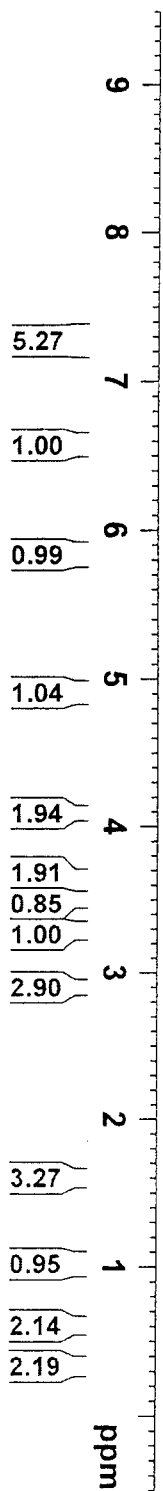

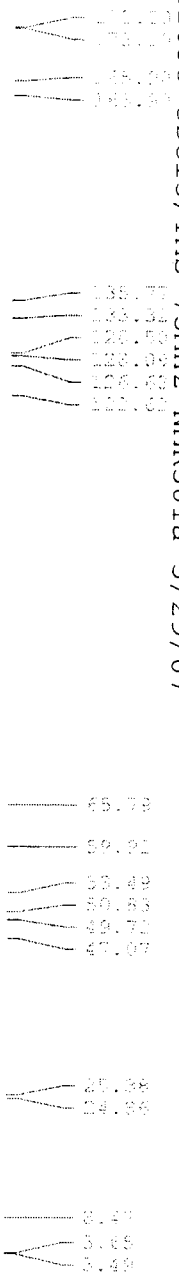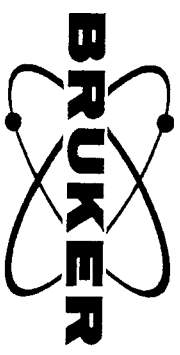

Current Data Parameters  
 NAME 16ADMT006168C  
 EXPNO 1  
 PROCNO 1

F2 - Acquisition Parameters  
 Date\_ 20070329  
 Time 11.41  
 INSTRUM spect  
 PROBHD 5 mm DUL 1H-13  
 PULPROG zgpg  
 TD 65536  
 SOLVENT CDCl3  
 NS 28  
 DS 4  
 SWH 18115.941 Hz  
 FIDRES 0.276427 Hz  
 AQ 1.8088436 sec  
 RG 32768  
 DW 27.600 usec  
 DE 6.00 usec  
 TE 300.0 K  
 D1 8.00000000 sec  
 d11 0.03000000 sec  
 DELTA 7.90000010 sec  
 TDO 1

==== CHANNEL F1 =====  
 NUC1 13C  
 P1 9.00 usec  
 PL1 1.80 dB  
 SF01 75.5381641 MHz

==== CHANNEL F2 =====  
 CPDPRG2 waltz16  
 NUC2 1H  
 PCPD2 92.00 usec  
 PL2 0.00 dB  
 PL12 20.00 dB  
 PL13 20.00 dB  
 SF02 300.3812015 MHz

F2 - Processing parameters

SI 65536  
 SF 75.5306158 MHz  
 WDW EM  
 SSB 0  
 LB 1.00 Hz  
 GB 0  
 PC 1.40

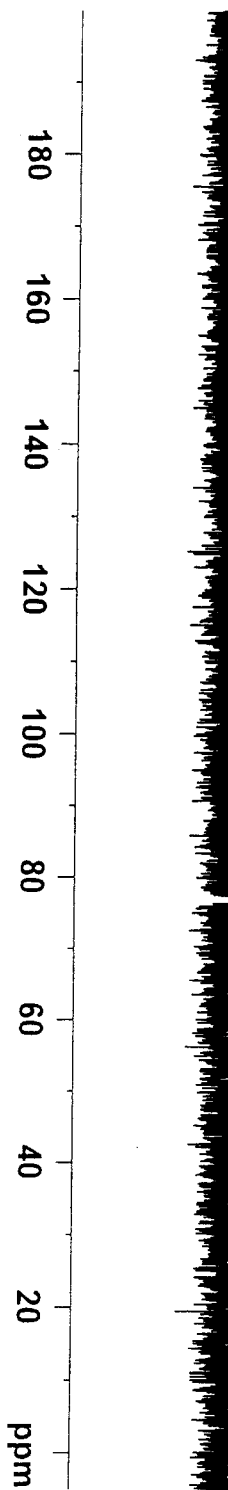

16ADMT006228H CDC13/TMS 300MHz NMR301 5/5/07

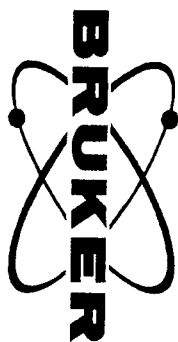

Current Data Parameters  
 NAME 16ADMT006228H  
 EXPNO 1  
 PROCNO 1

F2 - Acquisition Parameters

Date\_ 20070505  
 Time\_ 11.04  
 INSTRUM spect  
 PROBHD 5 mm QNP 1H/1  
 PULPROG zg  
 TD 32768  
 SOLVENT CDC13  
 NS 8  
 DS 2  
 SWH 6172.839 Hz  
 FIDRES 0.188380 Hz  
 AQ 2.6542580 sec  
 RG 128  
 DW 81.000 usec  
 DE 6.00 usec  
 TE 293.4 K  
 D1 1.00000000 sec  
 TD0 1

==== CHANNEL F1 =====

NUC1 1H  
 P1 7.00 usec  
 PL1 0.00 dB  
 SFO1 300.0868531 MHz

F2 - Processing parameters

SI 16384  
 SF 300.0849992 MHz  
 WDW no  
 SSB 0  
 LB 0.00 Hz  
 GB 0  
 PC 1.00

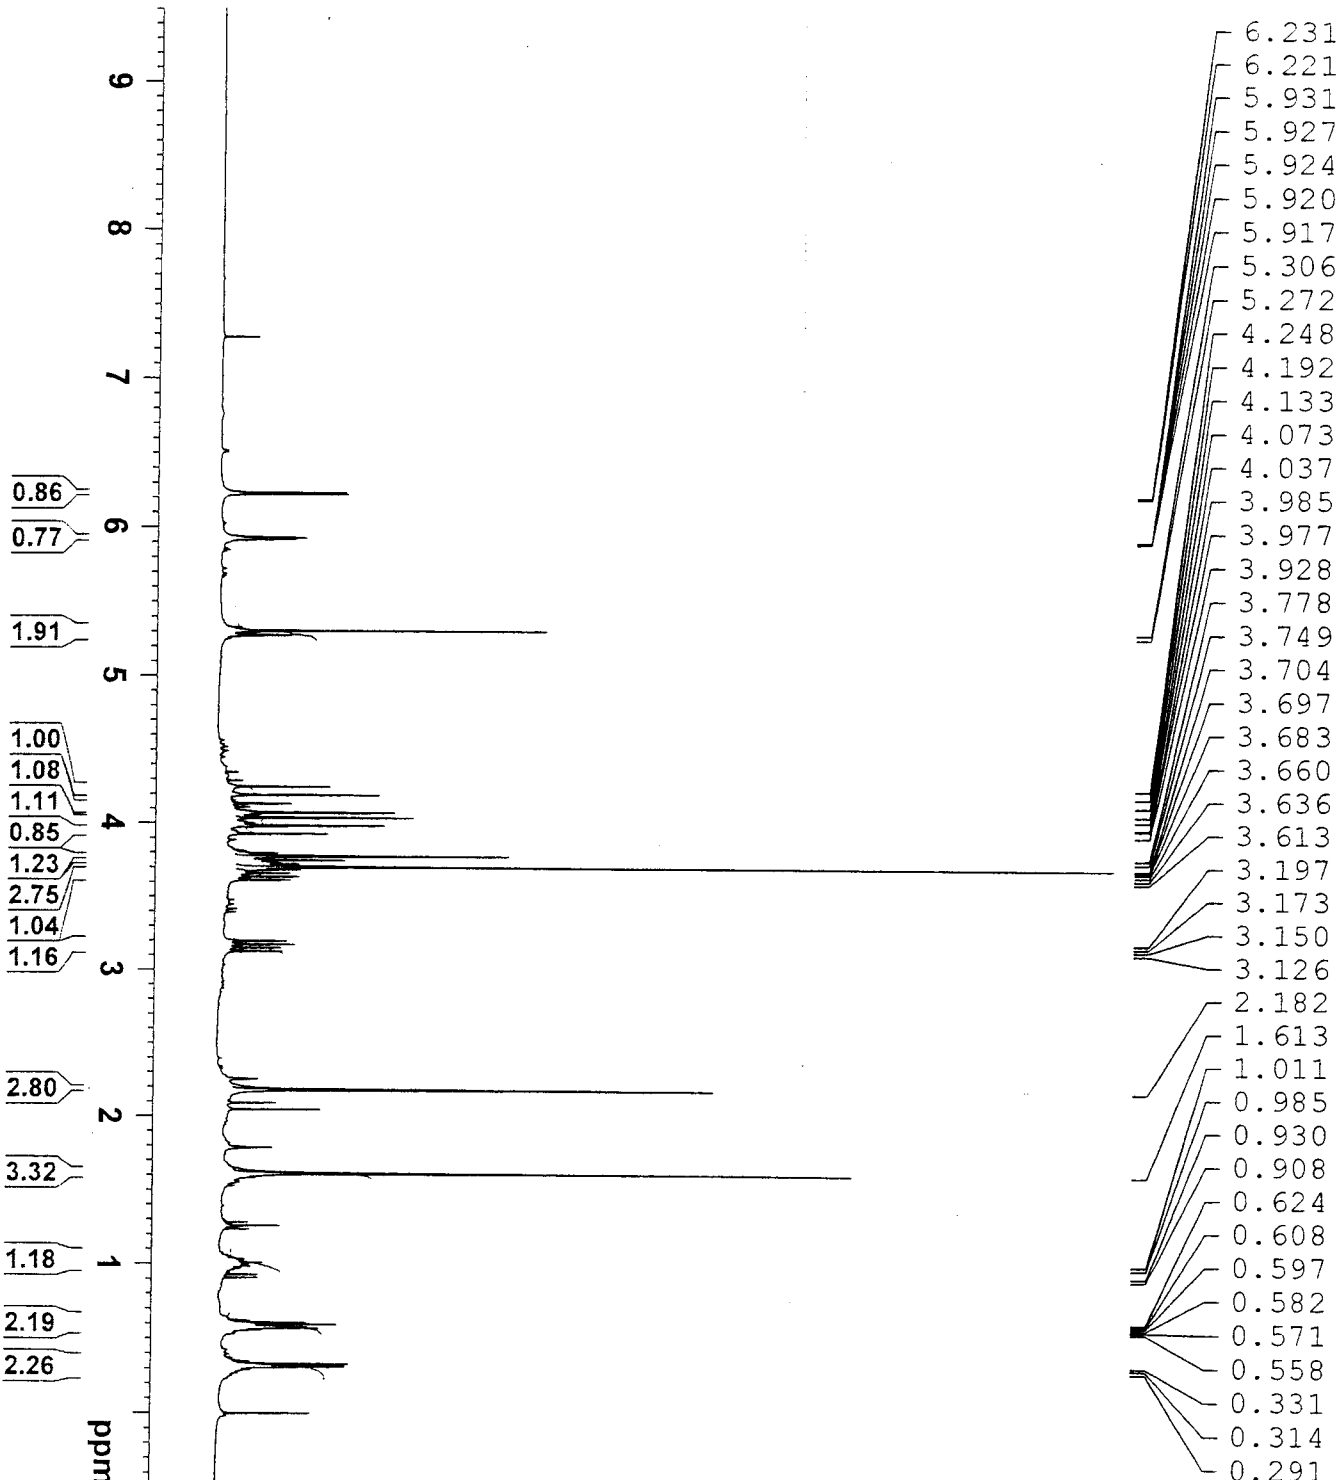

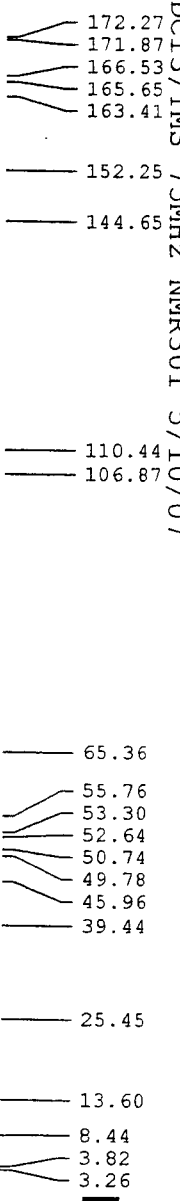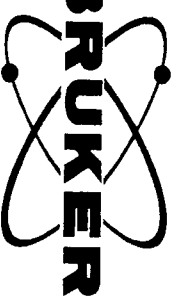

Current Data Parameters  
 NAME 16ADMT006228C  
 EXPNO 1  
 PROCNO 1

F2 - Acquisition Parameters  
 Date\_ 20070510  
 Time 11.26  
 INSTRUM spect  
 PROBHD 5 mm QNP 1H/1  
 PULPROG zgpg  
 TD 65536  
 SOLVENT CDC13  
 NS 58  
 DS 2  
 SWH 17985.611 Hz  
 FIDRES 0.274439 Hz  
 AQ 1.8219508 sec  
 RG 13004  
 DW 27.800 usec  
 DE 6.00 usec  
 TE 300.0 K  
 D1 8.00000000 sec  
 d11 0.03000000 sec  
 DELTA 7.90000010 sec  
 TDO 1

==== CHANNEL F1 =====  
 NUC1 13C  
 P1 7.00 usec  
 PL1 0.00 dB  
 SFO1 75.4639789 MHz

==== CHANNEL F2 =====  
 CPDPRG2 waltz16  
 NUC2 1H  
 PCPD2 100.00 usec  
 PL2 0.00 dB  
 PL12 18.24 dB  
 PL13 18.24 dB  
 SFO2 300.0862003 MHz

F2 - Processing parameters  
 SI 32768  
 SF 75.4564362 MHz  
 WDM EM  
 SSB 0  
 LB 1.00 Hz  
 GB 0  
 PC 1.40

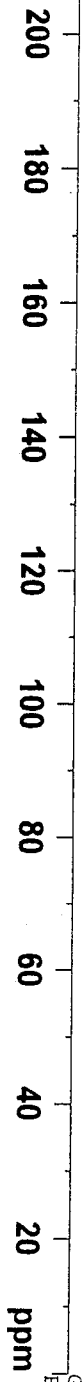

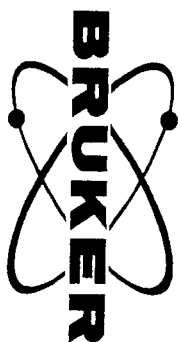

Current Data Parameters  
 NAME 16ADMT006230H  
 EXPNO 1  
 PROCNO 1

F2 - Acquisition Parameters

Date\_ 20070505  
 Time 11.16  
 INSTRUM spect  
 PROBHD 5 mm QNP 1H/1  
 PULPROG zg  
 TD 32768  
 SOLVENT CDCl3  
 NS 8  
 DS 2  
 SWH 6172.839 Hz  
 FIDRES 0.188380 Hz  
 AQ 2.6542580 sec  
 RG 50.8  
 DW 81.000 usec  
 DE 6.00 usec  
 TE 293.9 K  
 D1 1.00000000 sec  
 TD0 1

==== CHANNEL f1 =====  
 NUC1 1H  
 P1 7.00 usec  
 PL1 0.00 dB  
 SFO1 300.0868531 MHz

F2 - Processing parameters  
 SI 16384  
 SF 300.0850005 MHz  
 WDW no  
 SSB 0  
 LB 0.00 Hz  
 GB 0  
 PC 1.00

- 7.366
- 7.362
- 7.348
- 7.336
- 7.323
- 7.312
- 7.308
- 7.290
- 7.282
- 7.274
- 7.266
- 6.188
- 6.177
- 5.901
- 5.898
- 5.891
- 5.888
- 5.290
- 5.257
- 4.789
- 4.740
- 4.638
- 4.590
- 4.264
- 4.208
- 3.982
- 3.925
- 3.851
- 3.827
- 3.805
- 3.788
- 3.784
- 3.772
- 3.748
- 3.710
- 3.676
- 2.160
- 1.614

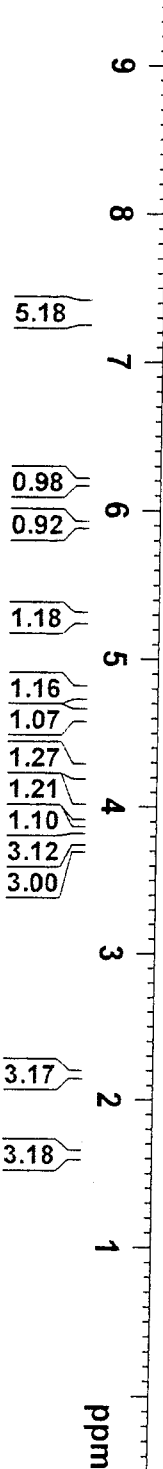

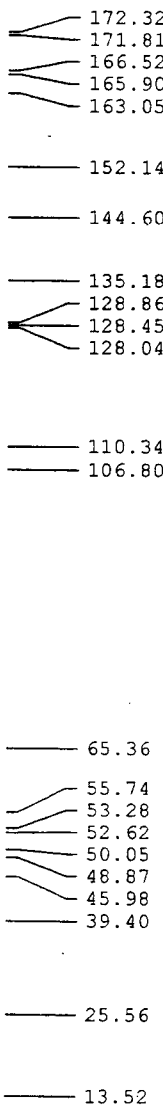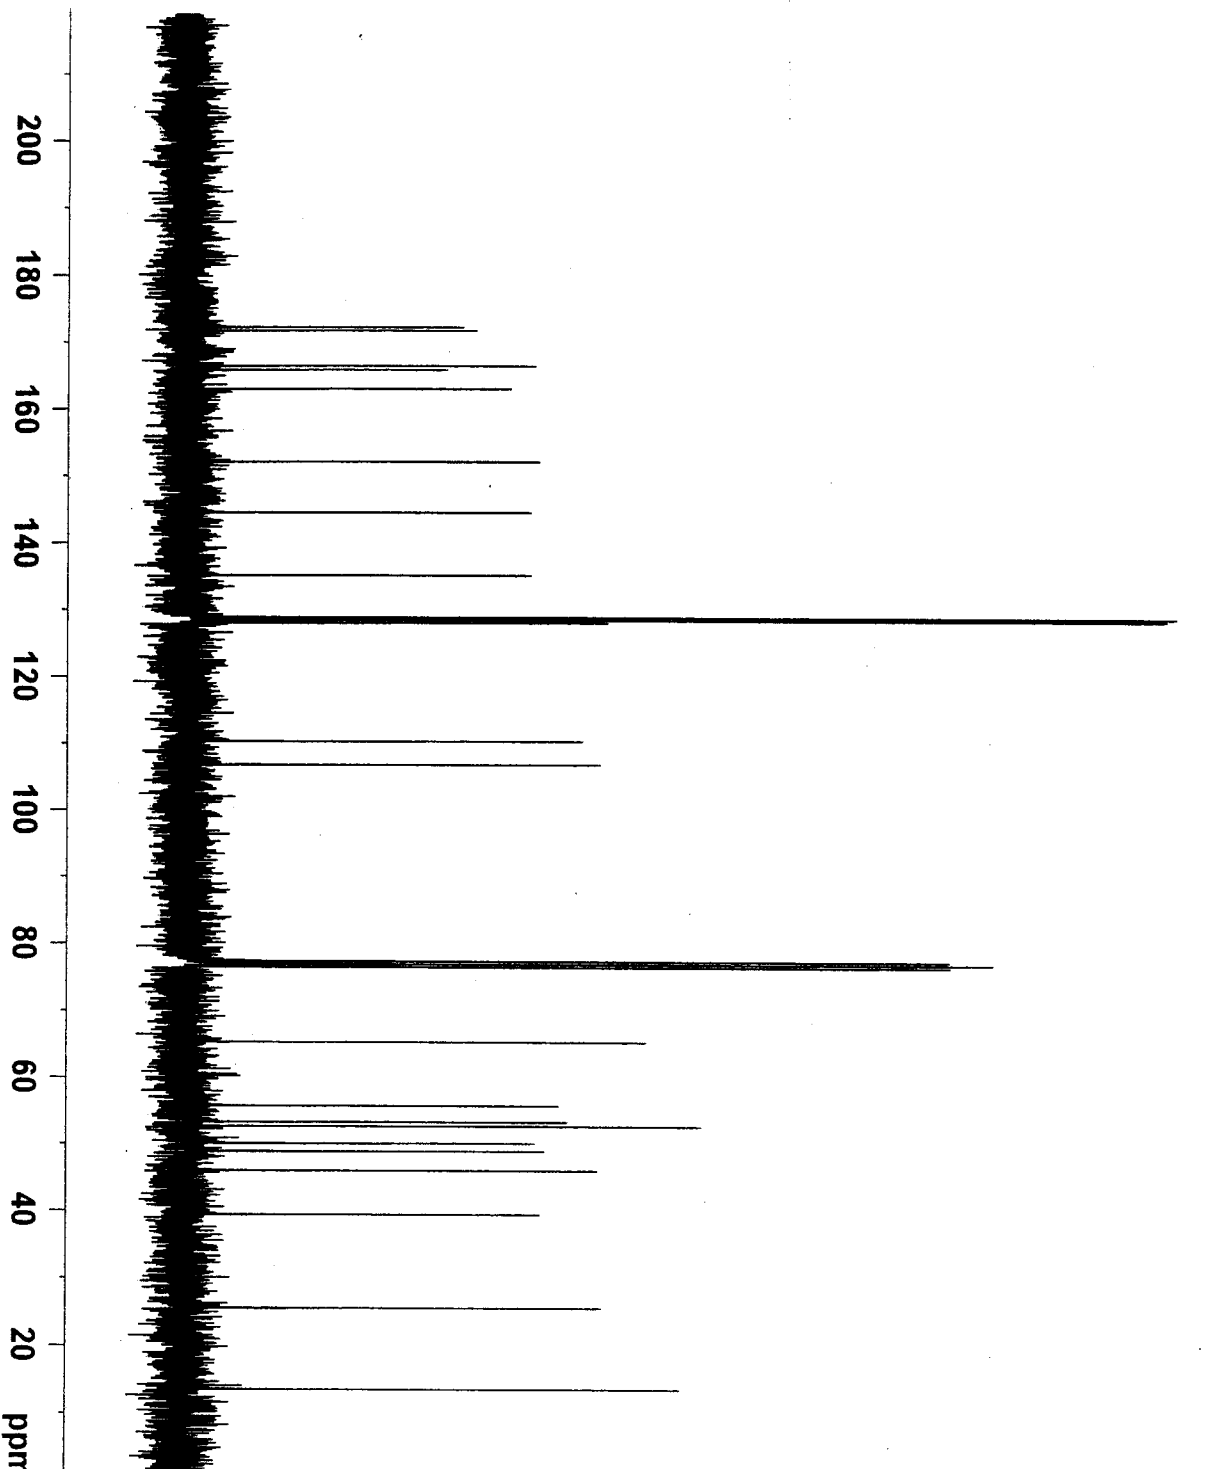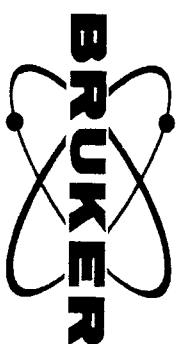

Current Data Parameters  
 NAME 16ADMT006230C  
 EXPNO 1  
 PROCNO 1

F2 - Acquisition Parameters  
 Date\_ 20070510  
 Time 11.08  
 INSTRUM spect  
 PROBHD 5 mm QNP 1H/1  
 PULPROG zgpg  
 TD 65536  
 SOLVENT CDC13  
 NS 25  
 DS 2  
 SMH 17985.611 Hz  
 FIDRES 0.274439 Hz  
 AQ 1.8219508 sec  
 RG 13004  
 DW 27.800 usec  
 DE 6.00 usec  
 TE 300.0 K  
 D1 10.00000000 sec  
 d11 0.03000000 sec  
 DELTA 9.89999962 sec  
 TDO 1

==== CHANNEL f1 =====  
 NUC1 13C  
 P1 7.00 usec  
 PL1 0.00 dB  
 SFO1 75.4639789 MHz

==== CHANNEL f2 =====  
 CPDPRG2 waltz16  
 NUC2 1H  
 PCPD2 100.00 usec  
 PL2 0.00 dB  
 PL12 18.24 dB  
 PL13 18.24 dB  
 SFO2 300.0862003 MHz

F2 - Processing parameters  
 SI 32768  
 SF 75.4564395 MHz  
 WDM EM  
 SSB 0  
 LB 1.00 Hz  
 GB 0  
 PC 1.40

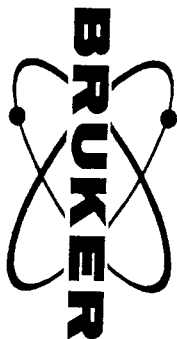

- 7.603
- 7.599
- 7.594
- 7.586
- 7.582
- 7.576
- 7.569
- 7.567
- 7.476
- 7.472
- 7.448
- 7.443
- 7.436
- 7.428
- 7.423
- 7.421
- 7.415
- 7.409
- 7.380
- 7.356
- 6.198
- 6.188
- 5.905
- 5.902
- 5.894
- 5.891
- 5.294
- 5.262
- 4.768
- 4.692
- 4.276
- 4.220
- 3.994
- 3.938
- 3.861
- 3.841
- 3.836
- 3.800
- 3.776
- 3.767
- 3.743
- 3.716
- 2.163
- 1.634

Current Data Parameters  
 NAME 16ADMT006232F2H  
 EXPNO 1  
 PROCNO 1

F2 - Acquisition Parameters  
 Date\_ 20070505  
 Time 11.30  
 INSTRUM spect  
 PROBHID 1H/1  
 PULPROG zg  
 TD 32768  
 SOLVENT CDCl3  
 NS 8  
 DS 2  
 SMH 6172.839 Hz  
 FIDRES 0.188380 Hz  
 AQ 2.6542580 sec  
 RG 128  
 DW 81.000 usec  
 DE 6.00 usec  
 TE 293.4 K  
 D1 1.0000000 sec  
 TDO 1

==== CHANNEL f1 =====  
 NUC1 1H  
 P1 7.00 usec  
 PL1 0.00 dB  
 SFO1 300.0868531 MHz  
 F2 - Processing parameters  
 SI 16384  
 SF 300.0850042 MHz  
 WDM no  
 SSB 0  
 LB 0.00 Hz  
 GB 0  
 PC 1.00

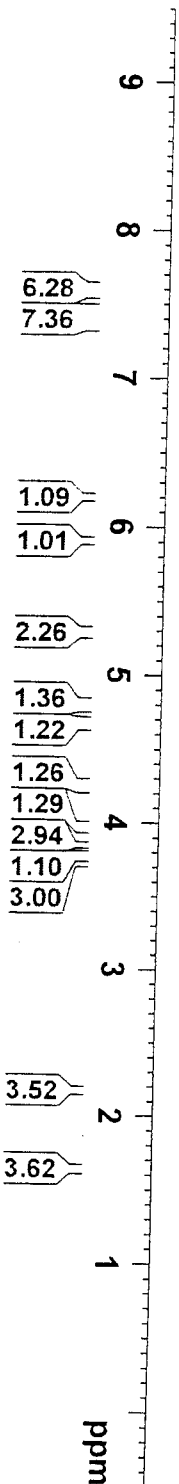



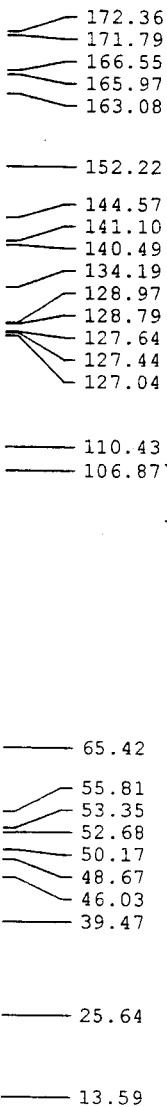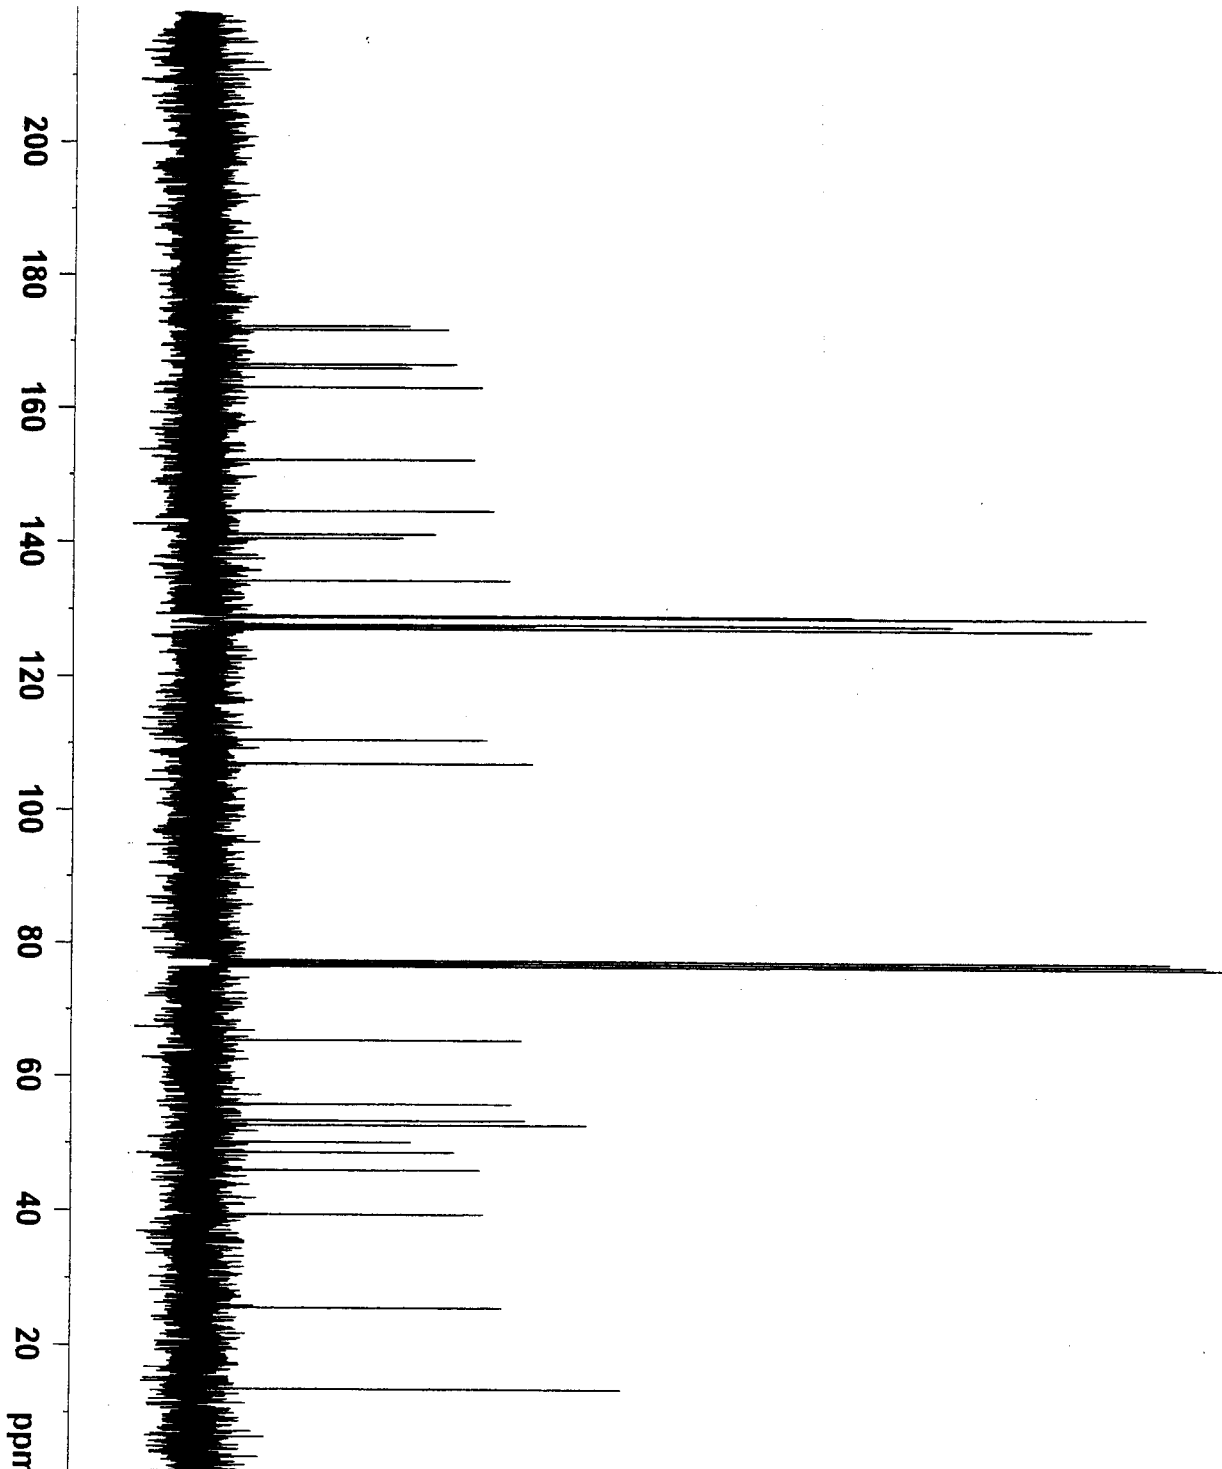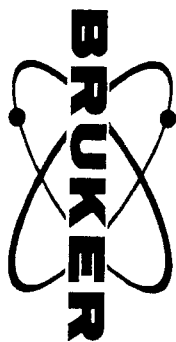

Current Data Parameters  
 NAME 16ADMT006232F2C  
 EXPNO 1  
 PROCNO 1

F2 - Acquisition Parameters  
 Date\_ 20070510  
 Time\_ 11.44  
 INSTRUM spect  
 PROBHD 5 mm QNP 1H/1  
 PULPROG zgpg  
 TD 65536  
 SOLVENT CDC13  
 NS 48  
 DS 2  
 SWH 17985.611 Hz  
 FIDRES 0.274439 Hz  
 AQ 1.8219508 sec  
 RG 13004  
 DW 27.800 usec  
 DE 6.00 usec  
 TE 300.0 K  
 D1 8.00000000 sec  
 d11 0.03000000 sec  
 DELTA 7.90000010 sec  
 TD0 1

==== CHANNEL F1 =====  
 NUC1 13C  
 P1 7.00 usec  
 PL1 0.00 dB  
 SFO1 75.4639789 MHz

==== CHANNEL F2 =====  
 CPDPRG2 waltz16  
 NUC2 1H  
 PCPD2 100.00 usec  
 PL2 0.00 dB  
 PL12 18.24 dB  
 PL13 18.24 dB  
 SFO2 300.0862003 MHz

F2 - Processing parameters  
 SI 32768  
 SF 75.4564368 MHz  
 WDM EM  
 SSB 0  
 LB 1.00 Hz  
 GB 0  
 PC 1.40

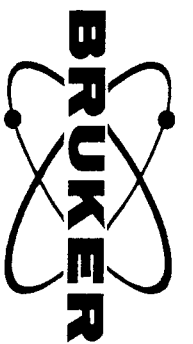

- 7.375
- 7.363
- 7.358
- 7.348
- 7.341
- 7.327
- 7.312
- 7.299
- 7.284
- 7.278
- 7.272
- 7.260
- 7.244
- 7.227
- 7.215
- 7.202
- 7.195
- 6.759
- 6.705
- 6.073
- 6.046
- 6.019
- 5.992
- 4.708
- 4.414
- 4.388
- 4.215
- 4.172
- 4.106
- 4.060
- 4.005
- 3.962
- 3.523
- 3.493
- 3.288
- 3.241
- 2.766
- 2.548
- 2.516
- 2.486
- 2.133
- 2.118
- 2.109
- 2.101

Current Data Parameters  
 NAME 16ADMT006242H  
 EXPNO 1  
 PROCNO 1

F2 - Acquisition Parameters  
 Date\_ 20070417  
 Time\_ 11.12  
 INSTRUM spect  
 PROBHD 5 mm QNP 1H/1  
 PULPROG zg  
 TD 32768  
 SOLVENT CDCl3  
 NS 8  
 DS 2  
 SWH 6172.839 Hz  
 FIDRES 0.188380 Hz  
 AQ 2.6542580 sec  
 RG 35.9  
 DW 81.000 usec  
 DE 6.00 usec  
 TE 300.0 K  
 D1 1.00000000 sec  
 TD0 1

==== CHANNEL F1 =====  
 NUC1 1H  
 P1 7.00 usec  
 PL1 0.00 dB  
 SFO1 300.0868531 MHz  
 F2 - Processing parameters  
 SI 16384  
 SF 300.0850053 MHz  
 WDW no  
 SSB 0  
 LB 0.00 Hz  
 GB 0  
 PC 1.00

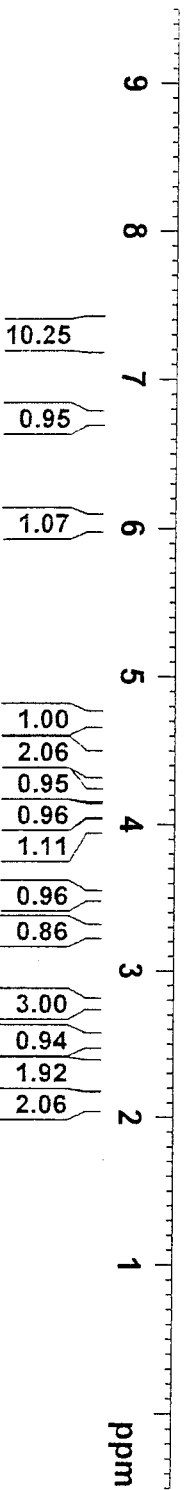

16ADMT0061461nH CDC13/TMS 300MHz NMR301 4/18/07

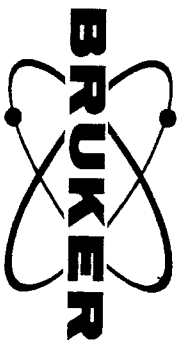

- 7.359
- 7.346
- 7.338
- 7.281
- 7.265
- 7.257
- 7.243
- 7.226
- 7.218
- 7.211
- 7.201
- 7.195
- 7.135
- 7.123
- 7.111
- 7.104
- 6.702
- 6.648
- 4.445
- 4.423
- 4.395
- 4.132
- 4.085
- 3.486
- 3.471
- 3.441
- 3.425
- 3.263
- 3.216
- 2.757
- 2.491
- 2.482
- 2.468
- 2.449
- 2.426
- 2.420
- 2.131
- 2.117
- 2.099
- 0.439
- 0.415
- 0.412
- 0.098
- 0.083

Current Data Parameters  
 NAME 16ADMT0062461nH  
 EXPNO 1  
 PROCNO 1

F2 - Acquisition Parameters  
 Date\_ 20070418  
 Time 8.58  
 INSTRUM spect  
 PROBHD 5 mm QNP 1H/1  
 PULPROG zg  
 TD 32768  
 SOLVENT CDC13  
 NS 8  
 DS 2  
 SWH 6172.839 Hz  
 FIDRES 0.188380 Hz  
 AQ 2.6542580 sec  
 RG 57  
 DW 81.000 usec  
 DE 6.00 usec  
 TE 300.0 K  
 D1 1.00000000 sec  
 TD0 1

==== CHANNEL F1 =====  
 NUCL1 1H  
 P1 7.00 usec  
 PL1 0.00 dB  
 SFO1 300.0868531 MHz

F2 - Processing parameters  
 SI 16384  
 SF 300.0850032 MHz  
 WDW no  
 SSB 0  
 LB 0.00 Hz  
 GB 0  
 PC 1.00

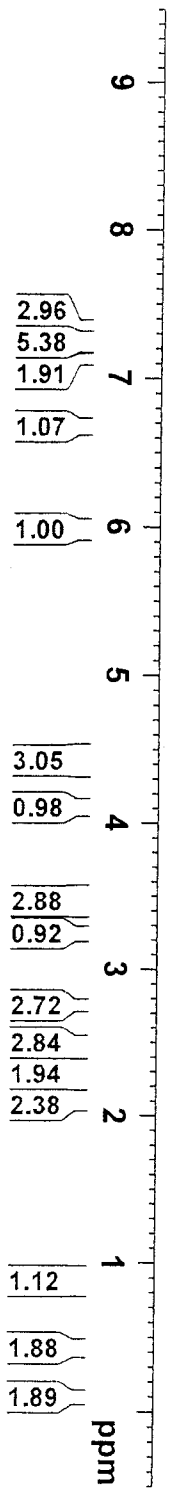

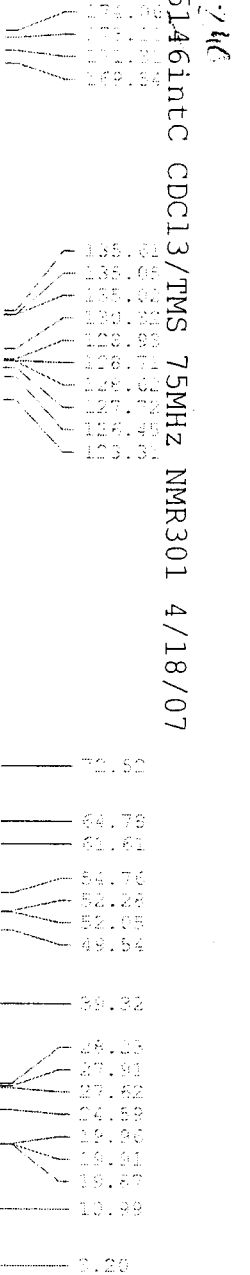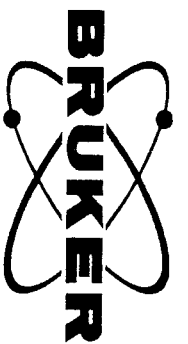

Current Data Parameters  
 NAME 16ADMT006246intc  
 EXPNO 1  
 PROCNO 1

F2 - Acquisition Parameters  
 Date\_ 20070418  
 Time\_ 9.11  
 INSTRUM spect  
 PROBHD 5 mm QNP 1H/1  
 PULPROG zgpg  
 TD 65536  
 SOLVENT CDC13  
 NS 80  
 DS 2  
 SWH 17985.611 Hz  
 FIDRES 0.274439 Hz  
 AQ 1.8219508 sec  
 RG 13004  
 DW 27.800 usec  
 DE 6.00 usec  
 TE 300.0 K  
 D1 8.00000000 sec  
 d11 0.03000000 sec  
 DELTA 7.90000010 sec  
 TD0 1

==== CHANNEL F1 =====  
 NUCl 13C  
 P1 7.00 usec  
 PL1 0.00 dB  
 SFO1 75.4639789 MHz

==== CHANNEL F2 =====  
 CPDPRG2 waltz16  
 NUCl2 1H  
 PCPD2 100.00 usec  
 PL2 0.00 dB  
 PL12 18.24 dB  
 PL13 18.24 dB  
 SFO2 300.0862003 MHz

F2 - Processing parameters  
 SI 32768  
 SF 75.4564551 MHz  
 WDW EM  
 SSB 0  
 LB 1.00 Hz  
 GB 0  
 PC 1.40

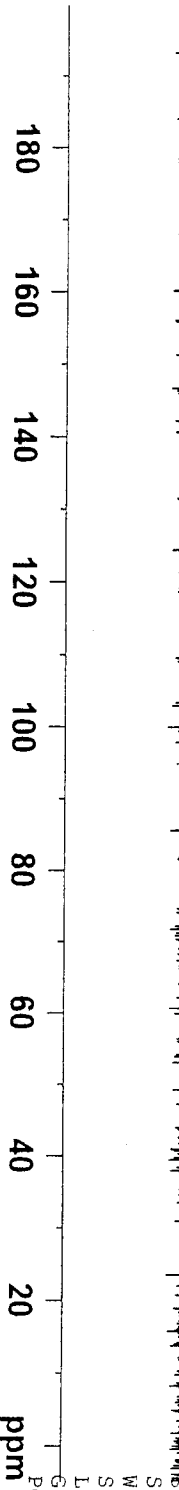

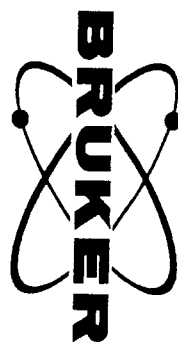

- 7.362
- 7.345
- 7.268
- 7.261
- 7.249
- 7.225
- 7.220
- 6.658
- 6.605
- 6.354
- 6.324
- 6.301
- 6.271
- 4.765
- 4.731
- 4.699
- 4.373
- 4.356
- 4.266
- 4.263
- 4.242
- 4.222
- 4.207
- 4.173
- 4.115
- 4.072
- 4.026
- 4.013
- 3.970
- 3.656
- 3.648
- 3.616
- 3.586
- 3.311
- 3.264
- 2.682
- 2.649
- 2.618
- 2.216
- 2.200
- 2.197
- 2.131
- 2.112
- 2.091

Current Data Parameters  
 NAME 16ADMT006266H  
 EXPNO 1  
 PROCNO 1

F2 - Acquisition Parameters  
 Date\_ 20070503  
 Time 11.05  
 INSTRUM spect  
 PROBHD 5 mm DUL 1H-13  
 PULPROG zg  
 TD 65536  
 SOLVENT CDCl3  
 NS 8  
 DS 2  
 SWH 6218.905 Hz  
 FIDRES 0.094893 Hz  
 AQ 5.2691445 sec  
 RG 32  
 DW 80.400 usec  
 DE 6.00 usec  
 TE 300.0 K  
 D1 1.00000000 sec  
 TPO 1

==== CHANNEL f1 =====  
 NUC1 1H  
 P1 9.00 usec  
 PL1 1.00 dB  
 SFO1 300.3818550 MHz

F2 - Processing parameters  
 SI 32768  
 SF 300.3800026 MHz  
 WDW no  
 SSB 0  
 LB 0.00 Hz  
 GB 0  
 PC 1.00

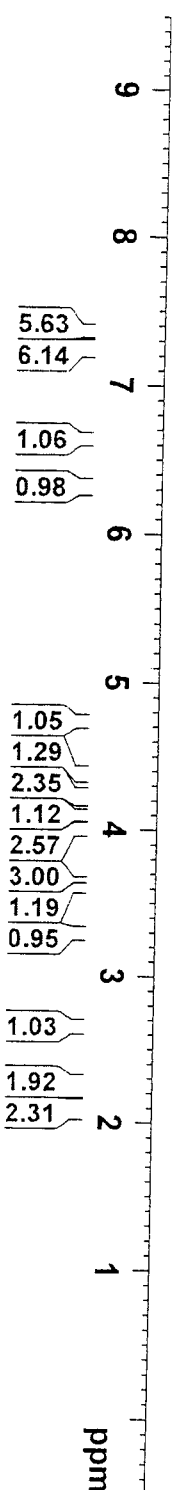

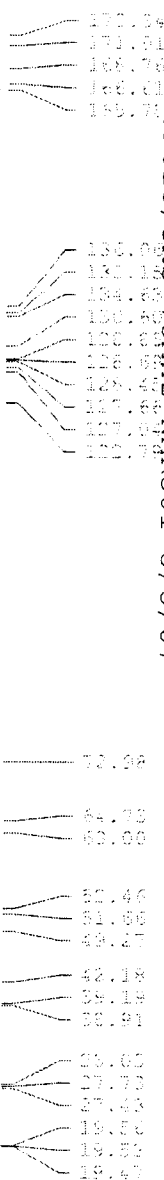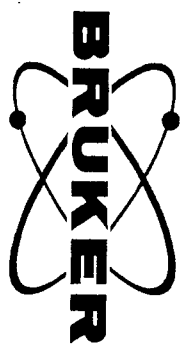

Current Data Parameters  
 NAME 16ADMT006266C  
 EXPNO 1  
 PROCNO 1

F2 - Acquisition Parameters  
 Date\_ 20070505  
 Time 15.03  
 INSTRUM spect  
 PROBHD 5 mm QNP 1H/1  
 PULPROG zgpg  
 TD 65536  
 SOLVENT CDC13  
 NS 26  
 DS 2  
 SWH 17985.611 Hz  
 FIDRES 0.274439 Hz  
 AQ 1.8219508 sec  
 RG 13004  
 DW 27.800 usec  
 DE 6.00 usec  
 TE 293.8 K  
 D1 8.00000000 sec  
 d11 0.03000000 sec  
 DELTA 7.90000010 sec  
 TD0 1

==== CHANNEL F1 =====  
 NUC1 13C  
 P1 7.00 usec  
 PL1 0.00 dB  
 SFO1 75.4639789 MHz

==== CHANNEL F2 =====  
 CPDPRG2 waltz16  
 NUC2 1H  
 PCPD2 100.00 usec  
 PL2 0.00 dB  
 PL12 18.24 dB  
 PL13 18.24 dB  
 SFO2 300.0862003 MHz

F2 - Processing parameters  
 SI 32768  
 SF 75.4564395 MHz  
 WDW EM  
 SSB 0  
 GB 1.00 Hz  
 PC 0  
 1.40

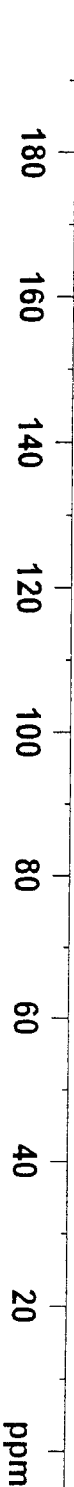

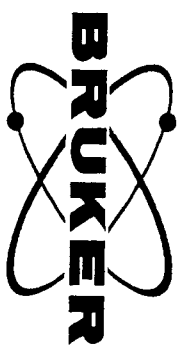

- 7.597
- 7.591
- 7.585
- 7.564
- 7.472
- 7.469
- 7.463
- 7.445
- 7.440
- 7.415
- 7.387
- 7.377
- 7.373
- 7.353
- 7.337
- 7.332
- 7.325
- 7.310
- 7.306
- 7.279
- 7.272
- 7.258
- 7.251
- 7.225
- 7.218
- 7.196
- 6.641
- 6.588
- 6.175
- 6.144
- 4.903
- 4.819
- 4.771
- 4.635
- 4.586
- 4.231
- 4.176
- 3.867
- 3.845
- 3.748
- 3.724
- 3.717
- 3.687
- 1.633

Current Data Parameters  
 NAME 16ADMT006270F2H  
 EXPNO 1  
 PROCNO 1

F2 - Acquisition Parameters

Date\_ 20070505  
 Time\_ 12.00  
 INSTRUM spect  
 PROBHD 5 mm QNP 1H/1  
 PULPROG zg  
 TD 32768  
 SOLVENT CDC13  
 NS 8  
 DS 2  
 SMH 6172.839 Hz  
 FIDRES 0.188380 Hz  
 AQ 2.6542580 sec  
 RG 57  
 DE 81.000 usec  
 TE 293.4 K  
 D1 1.00000000 sec  
 TD0 1

==== CHANNEL f1 =====

NUC1 1H  
 P1 7.00 usec  
 PL1 0.00 dB  
 SFO1 300.0868531 MHz

F2 - Processing parameters

SI 16384  
 SF 300.0850053 MHz  
 WDW no  
 SSB 0  
 LB 0.00 Hz  
 GB 0  
 PC 1.00

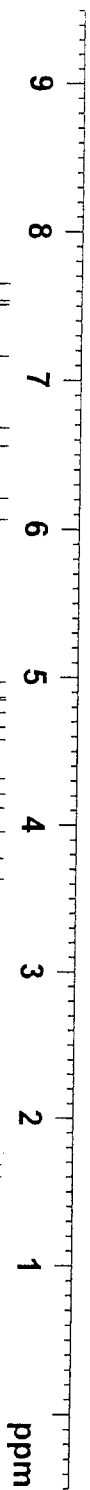

- 4.18
- 10.04
- 1.09
- 1.00
- 0.90
- 0.81
- 0.94
- 0.91
- 0.92
- 2.12
- 5.17
- 3.04

16ADMT006272F2H CDC13/TMS 300MHz NMR301 5/5/07

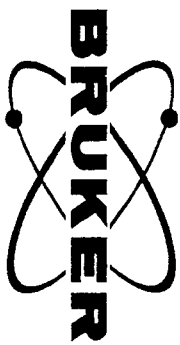

7.582  
7.577  
7.555  
7.459  
7.435  
7.430  
7.423  
7.416  
7.409  
7.395  
7.370  
7.353  
7.345  
7.337  
7.312  
7.301  
7.290  
7.284  
7.277  
7.262  
7.253  
7.239  
7.220  
7.136  
7.126  
7.124  
7.115  
7.109  
7.104  
6.654  
6.601  
6.074  
6.047  
5.994  
5.060  
4.715  
4.710  
3.902  
3.892  
3.887  
3.879  
3.855  
3.822  
1.635

Current Data Parameters  
NAME 16ADMT006272F2H  
EXPNO 1  
PROCNO 1

F2 - Acquisition Parameters  
Date\_ 20070505  
Time 12.14

INSTRUM spect  
PROBHD 5 mm QNP 1H/1  
PULPROG zg

TD 32768  
SOLVENT CDC13  
NS 8

DS 2  
SWH 6172.839 H2  
FIDRES 0.188380 Hz

AQ 2.6542580 sec  
RG 128  
DW 81.000 usec

DE 6.00 usec  
TE 293.8 K  
D1 1.00000000 sec

TD0 1  
===== CHANNEL F1 =====

NUC1 1H  
P1 7.00 usec  
PL1 0.00 dB

SFO1 300.0868531 MHz  
F2 - Processing parameters

SI 16384  
SF 300.0850072 MHz  
WDW no

SSB 0  
LB 0.00 Hz  
GB 0  
PC 1.00

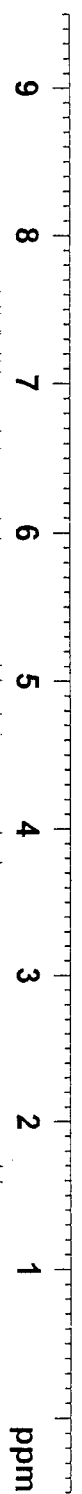

3.91  
3.92  
9.03  
1.97

1.00  
1.02

1.03  
2.00

4.07

3.10

ppm



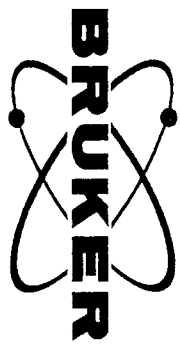

- 6.218
- 6.207
- 5.936
- 5.933
- 5.926
- 5.922
- 5.281
- 5.249
- 4.130
- 4.071
- 4.031
- 3.971
- 3.710
- 3.705
- 3.687
- 3.681
- 3.674
- 3.664
- 3.649
- 3.640
- 3.634
- 3.610
- 3.186
- 3.162
- 3.140
- 3.115
- 2.873
- 2.188
- 1.597
- 1.044
- 1.019
- 1.002
- 0.993
- 0.629
- 0.624
- 0.613
- 0.600
- 0.586
- 0.574
- 0.560
- 0.358
- 0.336
- 0.333
- 0.320

Current Data Parameters  
 NAME 16ADMT006274H  
 EXPNO 1  
 PROCNO 1

F2 - Acquisition Parameters  
 Date\_ 20070505  
 Time\_ 12.21  
 INSTRUM spect  
 PROBHD 5 mm QNP 1H/1  
 PULPROG zg  
 TD 32768  
 SOLVENT CDC13  
 NS 8  
 DS 2  
 SWH 6172.839 Hz  
 FIDRES 0.188380 Hz  
 AQ 2.6542580 sec  
 RG 45.3  
 DW 81.000 usec  
 DE 6.00 usec  
 TE 293.5 K  
 D1 1.00000000 sec  
 TD0 1

==== CHANNEL F1 =====  
 NUC1 1H  
 P1 7.00 usec  
 PL1 0.00 dB  
 SFO1 300.0868531 MHz

F2 - Processing Parameters  
 SI 16384  
 SF 300.0849951 MHz  
 WDM no  
 SSB 0  
 LB 0.00 Hz  
 GB 0  
 PC 1.00

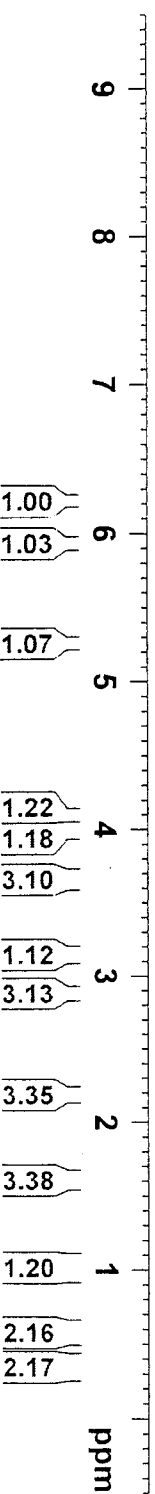

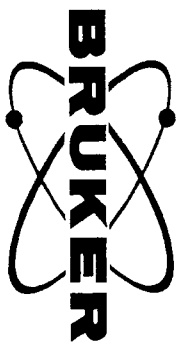

- 7.366
- 7.355
- 7.341
- 7.335
- 7.326
- 7.312
- 7.310
- 7.294
- 7.274
- 6.183
- 6.173
- 5.912
- 5.909
- 5.906
- 5.902
- 5.898
- 5.279
- 5.265
- 5.254
- 5.243
- 5.232
- 5.218
- 4.880
- 4.831
- 4.574
- 4.525
- 3.846
- 3.786
- 3.775
- 3.715
- 3.695
- 3.682
- 3.672
- 3.659
- 2.885
- 2.171
- 1.598

Current Data Parameters  
 NAME 16ADMT006276H  
 EXPNO 1  
 PROCNO 1

F2 - Acquisition Parameters  
 Date\_ 20070505  
 Time 12.29  
 INSTRUM spect  
 PROBHD 5 mm QNP 1H/1  
 PULPROG zg  
 TD 32768  
 SOLVENT CDCl3  
 NS 8  
 DS 2  
 SWH 6172.839 Hz  
 FIDRES 0.188380 Hz  
 AQ 2.6542580 sec  
 RG 50.8  
 DW 81.000 usec  
 DE 6.00 usec  
 TE 293.4 K  
 D1 1.00000000 sec  
 TD0 1

==== CHANNEL F1 =====  
 NUCL 1H  
 P1 7.00 usec  
 PL1 0.00 dB  
 SFO1 300.0868531 MHz

F2 - Processing parameters  
 SI 16384  
 SF 300.0850008 MHz  
 WDW no  
 SSB 0  
 LB 0.00 Hz  
 GB 0  
 PC 1.00

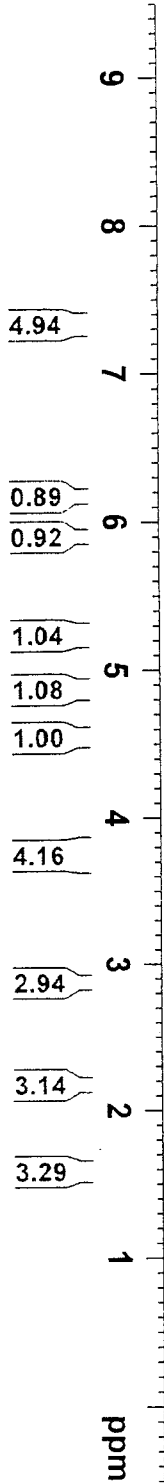

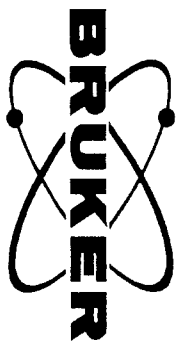

Current Data Parameters  
 NAME 16ADMT006278F3H  
 EXPNO 1  
 PROCNO 1

F2 - Acquisition Parameters

Date\_ 20070505  
 Time\_ 12.50  
 INSTRUM spect  
 PROBHD 5 mm QNP 1H/1  
 PULPROG zg  
 TD 32768  
 SOLVENT CDC13  
 NS 8  
 DS 2  
 SWH 6172.839 Hz  
 FIDRES 0.188380 Hz  
 AQ 2.6542580 sec  
 RG 35.9  
 DW 81.000 usec  
 DE 6.00 usec  
 TE 293.4 K  
 D1 1.00000000 sec  
 TD0 1

==== CHANNEL F1 =====

NUC1 1H  
 P1 7.00 usec  
 PL1 0.00 dB  
 SFO1 300.0868531 MHz

F2 - Processing parameters

SI 16384  
 SF 300.0850038 MHz  
 WDW no  
 SSB 0  
 LB 0.00 Hz  
 GB 0  
 PC 1.00

- 7.602
- 7.596
- 7.591
- 7.581
- 7.574
- 7.568
- 7.564
- 7.467
- 7.463
- 7.440
- 7.414
- 7.375
- 7.371
- 7.367
- 7.354
- 7.347
- 7.340
- 7.327
- 7.323
- 7.319
- 6.179
- 6.168
- 5.908
- 5.904
- 5.898
- 5.894
- 5.282
- 5.269
- 5.256
- 5.250
- 5.236
- 4.885
- 4.837
- 4.627
- 4.578
- 3.830
- 3.823
- 3.722
- 3.698
- 3.688
- 3.677
- 2.881
- 2.167
- 1.603

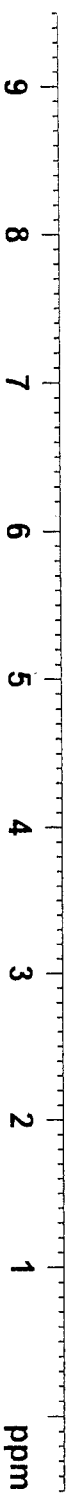

- 4.72
- 4.82
- 1.05
- 0.96
- 0.89
- 1.10
- 1.08
- 1.13
- 2.32
- 2.29
- 3.22
- 3.15
- 3.21

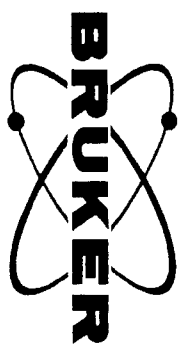

- 7.378
- 7.366
- 7.357
- 7.223
- 7.211
- 7.206
- 7.199
- 7.191
- 6.368
- 6.357
- 5.877
- 5.874
- 5.867
- 5.864
- 4.962
- 4.927
- 4.433
- 4.412
- 4.335
- 4.316
- 4.298
- 4.058
- 4.011
- 3.825
- 3.780
- 3.702
- 3.658
- 3.499
- 3.469
- 3.315
- 3.268
- 2.701
- 2.595
- 2.565
- 2.560
- 2.530
- 2.270
- 2.236
- 2.202
- 2.150
- 2.096
- 2.080
- 2.062
- 2.042

Current Data Parameters  
 NAME 16ADMT007006H  
 EXPNO 1  
 PROCNO 1

F2 - Acquisition Parameters  
 Date\_ 20070512  
 Time 14.29  
 INSTRUM spect  
 PROBHD 5 mm QNP 1H/1  
 PULPROG zg  
 TD 32768  
 SOLVENT CDCl3  
 NS 8  
 DS 2  
 SWH 6172.839 Hz  
 FIDRES 0.188380 Hz  
 AQ 2.6542580 sec  
 RG 228.1  
 DW 81.000 usec  
 DE 6.00 usec  
 TE 300.0 K  
 D1 1.00000000 sec  
 TD0 1

==== CHANNEL f1 =====  
 NUC1 1H  
 P1 7.00 usec  
 PL1 0.00 dB  
 SFO1 300.0868531 MHz  
 F2 - Processing parameters  
 SI 16384  
 SF 300.0850042 MHz  
 WDW no  
 SSB 0  
 LB 0.00 Hz  
 GB 0  
 PC 1.00

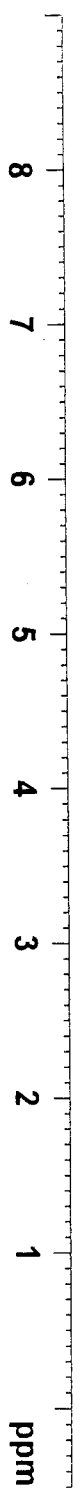

- 3.28
- 2.21
- 0.96
- 0.94
- 0.97
- 2.37
- 0.90
- 1.06
- 1.00
- 0.97
- 0.97
- 3.00
- 1.00
- 6.40
- 1.92

16ADMT007008H CDCl3/TMS 300MHz NMR301 5/14/07

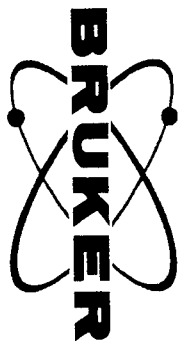

- 7.412
- 7.399
- 7.394
- 7.383
- 7.377
- 7.267
- 7.244
- 7.231
- 7.219
- 7.213
- 6.427
- 6.417
- 5.864
- 5.856
- 5.854
- 4.938
- 4.903
- 4.407
- 4.295
- 4.276
- 4.064
- 4.058
- 4.018
- 4.001
- 3.833
- 3.801
- 3.776
- 3.756
- 3.696
- 3.683
- 3.638
- 3.610
- 3.316
- 3.269
- 2.733
- 2.701
- 2.698
- 2.667
- 2.229
- 2.197
- 2.100
- 2.079
- 2.067
- 2.051

Current Data Parameters  
 NAME 16ADMT007008H  
 EXPNO 1  
 PROCNO 1

F2 - Acquisition Parameters  
 Date\_ 20070514  
 Time\_ 14.03  
 INSTRUM spect  
 PROBHD 5 mm QNP 1H/1  
 PULPROG zg  
 TD 32768  
 SOLVENT CDCl3  
 NS 8  
 DS 2  
 SWH 6172.839 Hz  
 FIDRES 0.188380 Hz  
 AQ 2.6542580 sec  
 RG 128  
 DW 81.000 usec  
 DE 6.00 usec  
 TE 300.0 K  
 D1 1.00000000 sec  
 TDO 1

==== CHANNEL F1 =====  
 NUC1 1H  
 P1 7.00 usec  
 PL1 0.00 dB  
 SF01 300.0868531 MHz  
 F2 - Processing Parameters  
 SI 16384  
 SF 300.0850027 MHz  
 WDW no  
 SSB 0  
 LB 0.00 Hz  
 GB 0  
 PC 1.00

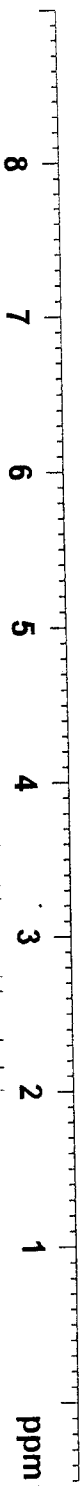

- 3.12
- 2.20
- 0.94
- 1.00
- 1.00
- 2.17
- 0.78
- 1.19
- 2.24
- 2.45
- 1.99
- 0.94
- 0.97
- 5.90
- 2.28

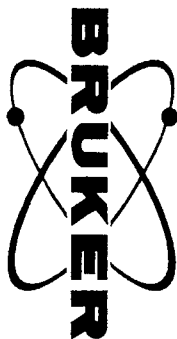

- 7.410
- 7.405
- 7.394
- 7.388
- 7.379
- 7.364
- 7.359
- 7.353
- 7.346
- 7.339
- 7.333
- 7.320
- 7.279
- 7.265
- 7.259
- 7.254
- 7.247
- 6.931
- 6.924
- 6.905
- 6.903
- 6.898
- 6.560
- 6.549
- 5.942
- 5.939
- 5.931
- 5.088
- 5.053
- 4.069
- 3.845
- 3.800
- 3.735
- 3.703
- 3.691
- 3.672
- 3.371
- 3.324
- 2.717
- 2.713
- 2.181
- 2.179
- 2.040
- 1.433

Current Data Parameters  
 NAME 16ADMT007010H  
 EXPNO 1  
 PROCNO 1

F2 - Acquisition Parameters  
 Date\_ 20070514  
 Time\_ 14.13  
 INSTRUM spect  
 PROBHD 5 mm QNP 1H/1  
 PULPROG zg  
 TD 32768  
 SOLVENT CDCl3  
 NS 8  
 DS 2  
 SWH 6172.839 Hz  
 FIDRES 0.188380 Hz  
 AQ 2.6542580 sec  
 RG 128  
 DW 81.000 usec  
 DE 6.00 usec  
 TE 299.9 K  
 D1 1.00000000 sec  
 TD0 1

==== CHANNEL f1 =====  
 NUC1 1H  
 P1 7.00 usec  
 PL1 0.00 dB  
 SFO1 300.0868531 MHz  
 F2 - Processing parameters  
 SI 16384  
 SF 300.0850050 MHz  
 WDW no  
 SSB 0  
 LB 0.00 Hz  
 GB 0  
 PC 1.00

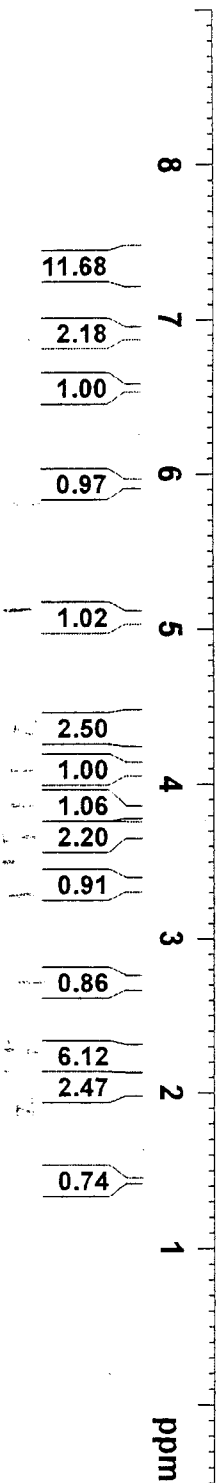

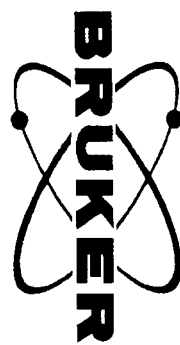

- 7.400
- 7.383
- 7.377
- 7.368
- 7.293
- 7.279
- 7.266
- 7.264
- 7.255
- 7.247
- 7.242
- 7.236
- 7.210
- 7.189
- 6.926
- 6.922
- 6.899
- 6.894
- 6.875
- 6.821
- 6.319
- 6.292
- 6.238
- 4.873
- 4.396
- 4.371
- 4.259
- 4.216
- 4.168
- 4.121
- 4.038
- 3.994
- 3.703
- 3.673
- 3.338
- 3.291
- 2.676
- 2.644
- 2.613
- 2.271
- 2.109
- 2.094
- 2.078
- 1.433

Current Data Parameters  
 NAME 16ADMT007012H  
 EXPNO 1  
 PROCNO 1

F2 - Acquisition Parameters  
 Date\_ 20070514  
 Time 14.23  
 INSTRUM spect  
 PROBHD 5 mm QNP 1H/1  
 PULPROG zg  
 TD 32768  
 SOLVENT CDCl3  
 NS 8  
 DS 2  
 SWH 6172.839 Hz  
 FIDRES 0.188380 Hz  
 AQ 2.6542580 sec  
 RG 128  
 DW 81.000 usec  
 DE 6.00 usec  
 TE 300.1 K  
 D1 1.00000000 sec  
 TD0 1

==== CHANNEL F1 =====  
 NUC1 1H  
 P1 7.00 usec  
 PL1 0.00 dB  
 SFO1 300.0668531 MHz  
 F2 - Processing Parameters  
 SI 16384  
 SF 300.0850064 MHz  
 WDW no  
 SSB 0  
 LB 0.00 Hz  
 GB 0  
 PC 1.00

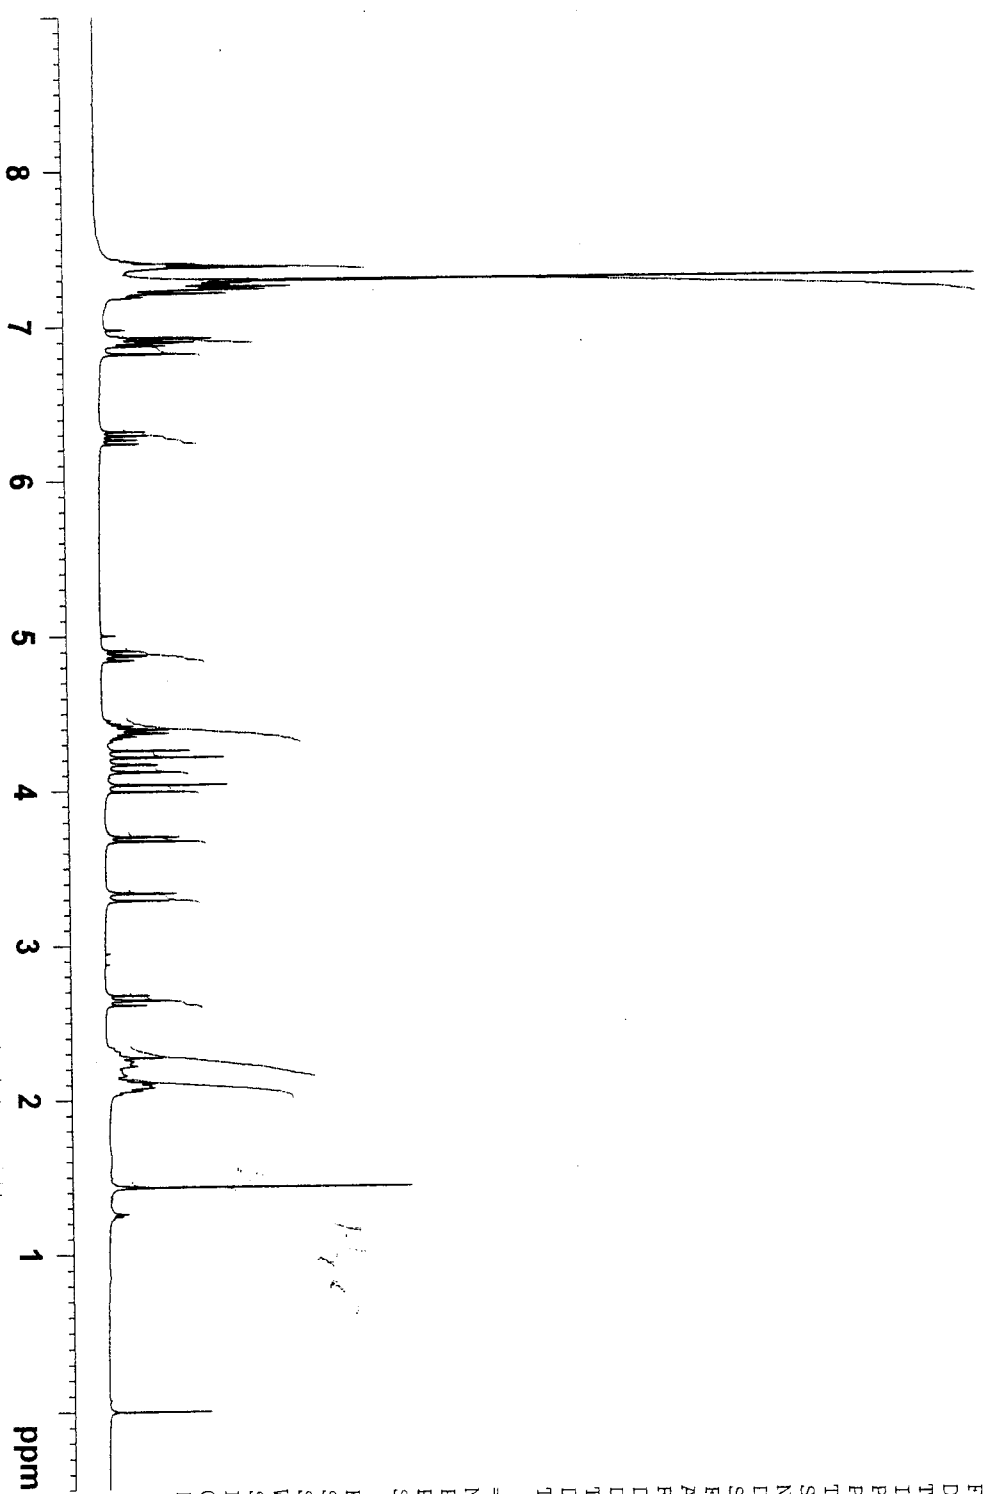

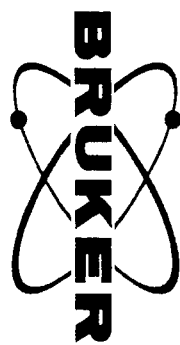

- 8.529
- 8.527
- 8.511
- 7.676
- 7.670
- 7.437
- 7.426
- 7.410
- 7.403
- 7.397
- 7.383
- 7.378
- 7.361
- 7.356
- 7.351
- 7.332
- 7.221
- 7.205
- 7.192
- 7.187
- 7.180
- 7.169
- 7.163
- 7.160
- 6.270
- 6.260
- 5.944
- 5.941
- 5.934
- 5.931
- 5.378
- 5.014
- 4.964
- 4.622
- 4.572
- 4.251
- 4.191
- 4.003
- 3.942
- 3.849
- 3.839
- 3.826
- 2.074
- 1.668

Current Data Parameters  
 NAME 16ADMT007014H  
 EXPNO 1  
 PROCNO 1

F2 - Acquisition Parameters  
 Date\_ 20070512  
 Time 11.01  
 INSTRUM spect  
 PROBHD 5 mm QNP 1H/1  
 PULPROG zg  
 TD 32768  
 SOLVENT CDCl3  
 NS 8  
 DS 2  
 SWH 6172.839 Hz  
 FIDRES 0.188380 Hz  
 AQ 2.6542580 sec  
 RG 322.5  
 DW 81.000 usec  
 DE 6.00 usec  
 TE 300.0 K  
 D1 1.00000000 sec  
 TD0 1

==== CHANNEL F1 =====  
 NUC1 1H  
 P1 7.00 usec  
 PL1 0.00 dB  
 SFO1 300.0868531 MHz  
 F2 - Processing parameters  
 SI 16384  
 SF 300.0850046 MHz  
 WDW no  
 SSB 0  
 LB 0.00 Hz  
 GB 0  
 PC 1.00

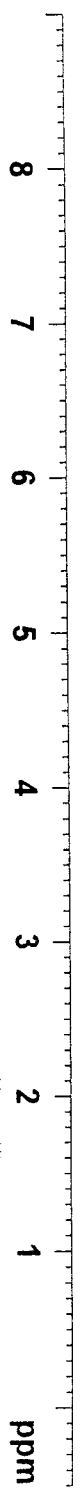

- 1.01
- 0.97
- 4.62
- 3.44
- 0.88
- 0.88
- 0.98
- 0.96
- 1.00
- 1.00
- 1.00
- 2.01
- 3.14
- 3.00



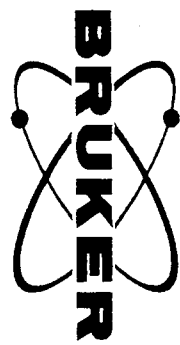

- 7.729
- 7.710
- 7.704
- 7.684
- 7.678
- 7.458
- 7.432
- 7.236
- 7.219
- 7.211
- 7.195
- 6.200
- 6.189
- 5.919
- 5.911
- 5.908
- 5.281
- 5.250
- 5.069
- 5.018
- 4.582
- 4.531
- 4.232
- 4.171
- 3.984
- 3.924
- 3.700
- 3.676
- 3.643
- 3.619
- 2.886
- 2.181
- 1.614

Current Data Parameters  
 NAME 16ADMT007018H  
 EXPNO 1  
 PROCNO 1

F2 - Acquisition Parameters  
 Date\_ 20070512  
 Time\_ 11.18  
 INSTRUM spect  
 PROBHD 5 mm QNP 1H/1  
 PULPROG zg  
 TD 32768  
 SOLVENT CDC13  
 NS 8  
 DS 2  
 SWH 6172.839 Hz  
 FIDRES 0.188380 Hz  
 AQ 2.6542580 sec  
 RG 228.1  
 DW 81.000 usec  
 DE 6.00 usec  
 TE 300.0 K  
 D1 1.00000000 sec  
 TD0 1

==== CHANNEL f1 =====  
 NUCl 1H  
 P1 7.00 usec  
 PL1 0.00 dB  
 SFO1 300.0868531 MHz

F2 - Processing parameters  
 SI 16384  
 SF 300.0850031 MHz  
 WDW no  
 SSB 0  
 LB 0.00 Hz  
 GB 0  
 PC 1.00

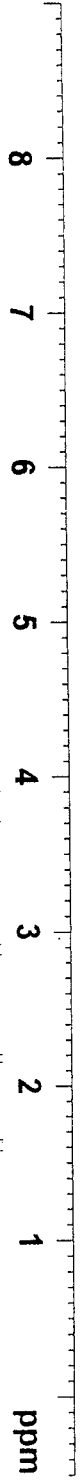

16ADMT007022H CDCl3/TMS 300MHz NMR301 5/12/07

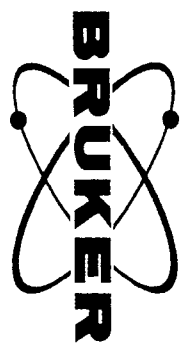

- 8.529
- 8.526
- 8.515
- 8.513
- 8.510
- 7.707
- 7.702
- 7.682
- 7.676
- 7.443
- 7.417
- 7.241
- 7.238
- 7.221
- 7.216
- 7.199
- 6.204
- 6.193
- 5.910
- 5.908
- 5.900
- 5.897
- 5.306
- 5.298
- 5.275
- 5.017
- 4.966
- 4.613
- 4.562
- 4.256
- 4.228
- 4.200
- 4.167
- 3.987
- 3.929
- 3.821
- 3.812
- 3.797
- 3.788
- 3.757
- 3.732
- 3.714
- 2.172
- 1.632

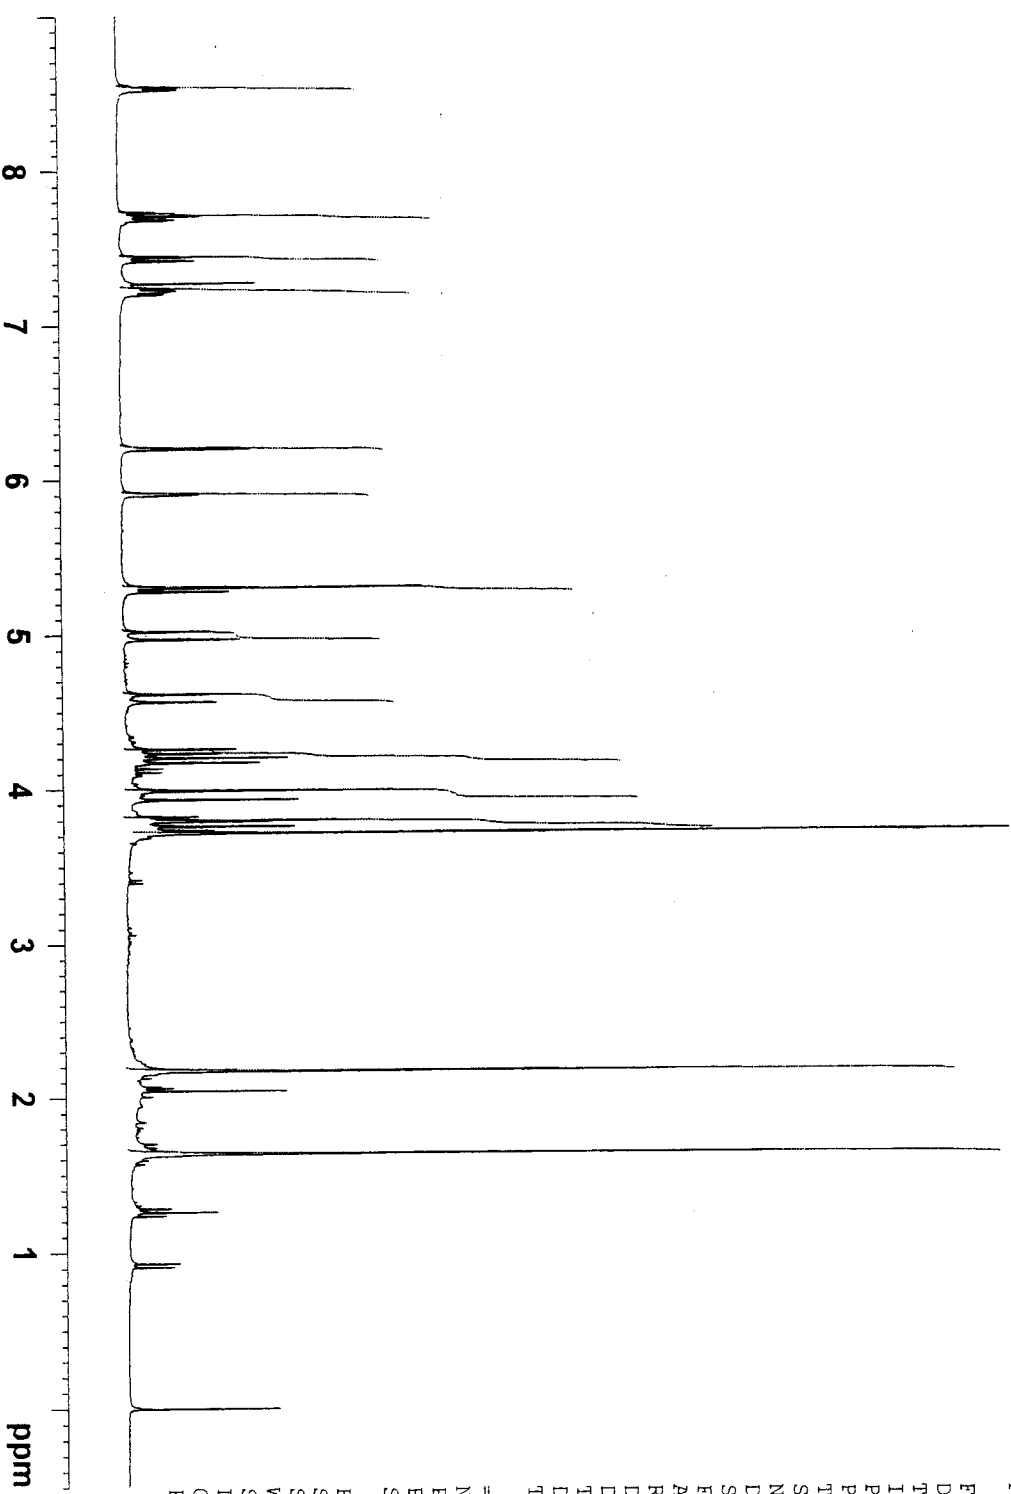

Current Data Parameters  
 NAME 16ADMT007022H  
 EXPNO 1  
 PROCNO 1

F2 - Acquisition Parameters  
 Date\_ 20070512  
 Time 11.36  
 INSTRUM spect  
 PROBHD 5 mm QNP 1H/1  
 PULPROG zg  
 TD 32768  
 SOLVENT CDCl3  
 NS 8  
 DS 2  
 SWH 6172.839 Hz  
 FIDRES 0.188380 Hz  
 AQ 2.6542580 sec  
 RG 128  
 DW 81.000 usec  
 DE 6.00 usec  
 TE 300.0 K  
 D1 1.00000000 sec  
 TDO 1

==== CHANNEL f1 =====  
 NUC1 1H  
 P1 7.00 usec  
 PL1 0.00 dB  
 SFO1 300.0868531 MHz  
 F2 - Processing parameters  
 SI 16384  
 SF 300.0850019 MHz  
 WDW no  
 SSB 0  
 LB 0.00 Hz  
 GB 0  
 PC 1.00

16ADMT007032F1H CDC13/TMS 300MHz NMR301 5/12/07

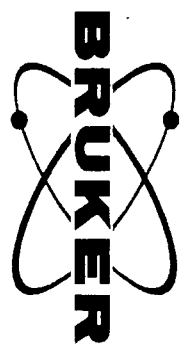

- 8.470
- 8.468
- 8.454
- 8.452
- 7.745
- 7.739
- 7.719
- 7.714
- 7.563
- 7.537
- 7.292
- 7.275
- 7.264
- 7.250
- 7.238
- 7.226
- 7.210
- 7.173
- 7.148
- 7.123
- 7.072
- 7.048
- 6.685
- 6.633
- 5.803
- 5.774
- 5.750
- 5.721
- 5.088
- 5.060
- 5.031
- 4.950
- 4.902
- 4.167
- 4.118
- 3.769
- 3.748
- 3.719
- 3.462
- 3.417
- 3.402
- 2.945
- 2.266
- 2.207

Current Data Parameters  
 NAME 16ADMT007032F1H  
 EXPNO 1  
 PROCNO 1

F2 - Acquisition Parameters  
 Date\_ 20070512  
 Time 12.09  
 INSTRUM spect  
 PROBHD 5 mm QNP 1H/1  
 PULPROG zg  
 TD 32768  
 SOLVENT CDC13  
 NS 8  
 DS 2  
 SWH 6172.839 Hz  
 FIDRES 0.188380 Hz  
 AQ 2.6542580 sec  
 RG 128  
 DW 81.000 usec  
 DE 6.00 usec  
 TE 300.0 K  
 D1 1.00000000 sec  
 TD0 1

==== CHANNEL F1 =====  
 NUC1 1H  
 P1 7.00 usec  
 PL1 0.00 dB  
 SFO1 300.0868531 MHz

F2 - Processing Parameters  
 SI 16384  
 SF 300.0850034 MHz  
 WDM no  
 SSB 0  
 LB 0.00 Hz  
 GB 0  
 PC 1.00

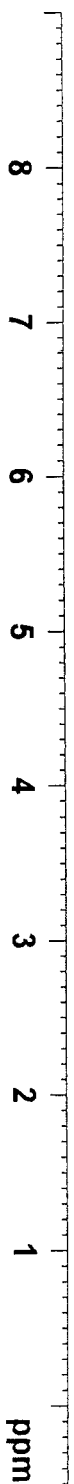

- 0.80
- 0.84
- 0.84
- 6.45
- 1.68
- 1.77
- 0.80
- 0.76
- 0.71
- 0.81
- 1.00
- 1.77
- 0.83
- 1.02
- 3.33
- 0.90

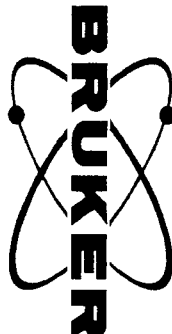

- 7.679
- 7.673
- 7.428
- 7.402
- 7.311
- 7.307
- 7.296
- 7.289
- 7.285
- 7.280
- 7.275
- 7.273
- 7.262
- 7.257
- 7.248
- 7.237
- 7.226
- 7.222
- 7.209
- 7.205
- 7.200
- 7.197
- 7.130
- 7.126
- 7.121
- 7.116
- 7.110
- 7.098
- 6.681
- 6.628
- 6.084
- 6.057
- 6.031
- 4.954
- 4.903
- 4.656
- 4.606
- 4.284
- 4.223
- 4.056
- 3.995
- 3.850
- 3.821
- 1.652

Current Data Parameters  
 NAME 16ADMT007056H  
 EXPNO 1  
 PROCNO 1

F2 - Acquisition Parameters  
 Date\_ 20070514  
 Time 14.41  
 INSTRUM spect  
 PROBHD 5 mm QNP 1H/1  
 PULPROG zg  
 TD 32768  
 SOLVENT CDC13  
 NS 8  
 DS 2  
 SWH 6172.839 Hz  
 FIDRES 0.188380 Hz  
 AQ 2.6542580 sec  
 RG 128  
 DW 81.000 usec  
 DE 6.00 usec  
 TE 300.0 K  
 D1 1.00000000 sec  
 TD0 1

==== CHANNEL f1 =====  
 NUC1 1H  
 P1 7.00 usec  
 PL1 0.00 dB  
 SFO1 300.0868531 MHz  
 F2 - Processing parameters  
 SI 16384  
 SF 300.0850042 MHz  
 WDW no  
 SSB 0  
 LB 0.00 Hz  
 GB 0  
 PC 1.00

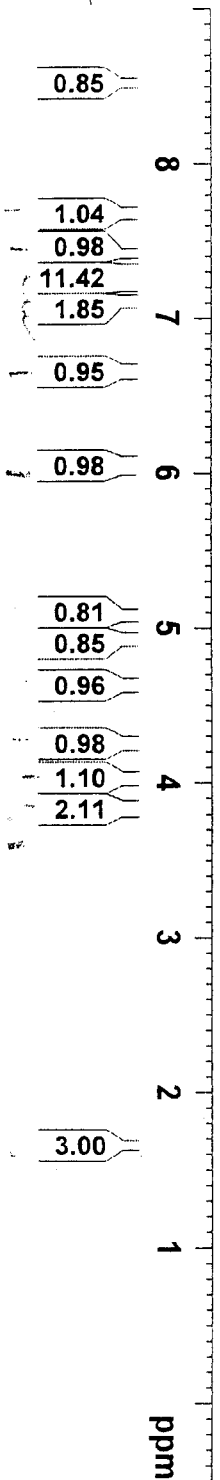

16ADMT007058H CDC13/TMS 300MHz NMR301 5/14/07

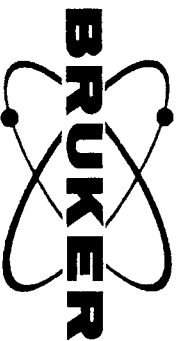

Current Data Parameters  
 NAME 16ADMT007058H  
 EXPNO 1  
 PROCNO 1

- 8.464
- 8.450
- 8.448
- 7.720
- 7.714
- 7.543
- 7.517
- 7.281
- 7.265
- 7.241
- 7.238
- 7.220
- 7.169
- 7.143
- 7.119
- 6.990
- 6.966
- 6.962
- 4.984
- 4.936
- 4.086
- 4.038
- 3.703
- 3.679
- 3.646
- 3.615
- 3.591
- 3.507
- 3.453
- 3.394
- 3.350
- 2.995
- 2.857
- 2.812
- 2.279
- 2.220
- 0.827
- 0.814
- 0.798
- 0.793
- 0.787
- 0.539
- 0.527
- 0.517

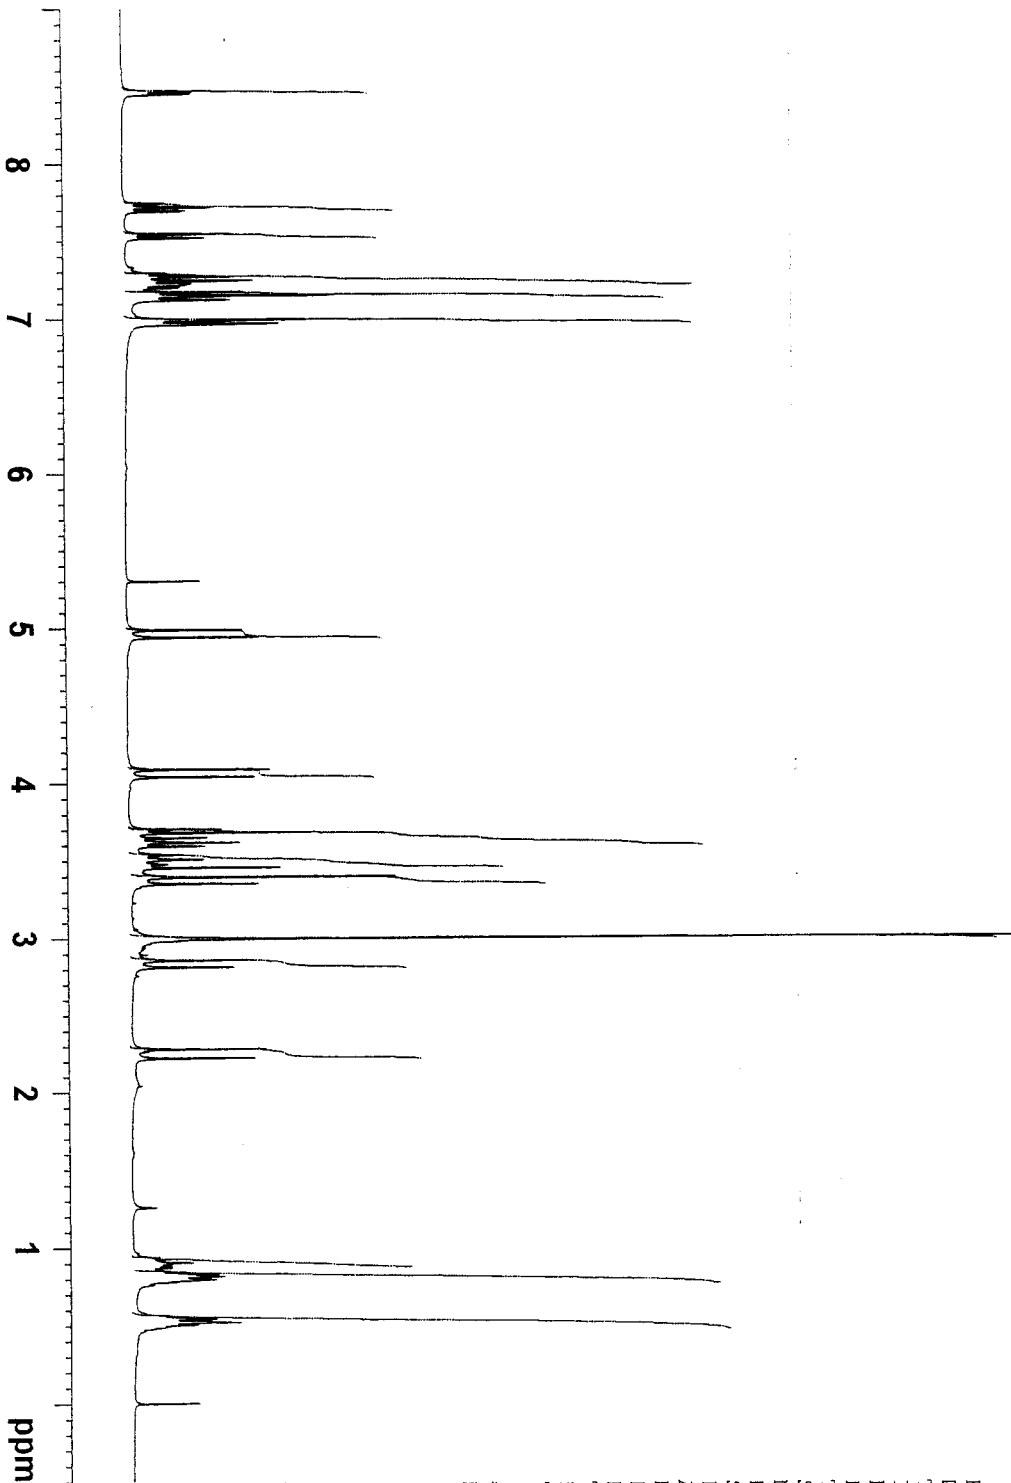

F2 - Acquisition Parameters  
 Date\_ 20070514  
 Time 14.49  
 INSTRUM spect  
 PROBHD 5 mm QNP 1H/1  
 PULPROG zg  
 TD 32768  
 SOLVENT CDC13  
 NS 8  
 DS 2  
 SWH 6172.839 Hz  
 FIDRES 0.188380 Hz  
 AQ 2.6542580 sec  
 RG 71.8  
 DW 81.000 usec  
 DE 6.00 usec  
 TE 300.0 K  
 D1 1.00000000 sec  
 TD0 1

==== CHANNEL f1 =====  
 NUCl 1H  
 P1 7.00 usec  
 PL1 0.00 dB  
 SFO1 300.0868531 MHz  
 F2 - Processing parameters  
 SI 16384  
 SF 300.0849985 MHz  
 WDW no  
 SSB 0  
 LB 0.00 Hz  
 GB 0  
 PC 1.00

16ADMT007062H CDCl3/TMS 300MHz NMR301a 5/16/07

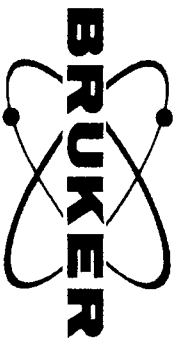

- 8.466
- 8.463
- 8.460
- 8.450
- 8.447
- 8.444
- 7.682
- 7.676
- 7.461
- 7.435
- 7.273
- 7.247
- 7.180
- 7.154
- 7.130
- 7.005
- 6.981
- 4.993
- 4.944
- 4.333
- 4.276
- 4.234
- 4.084
- 4.035
- 3.796
- 3.771
- 3.706
- 3.671
- 3.647
- 3.521
- 3.465
- 3.428
- 3.406
- 3.384
- 2.888
- 2.844
- 2.309
- 2.250
- 0.932
- 0.910
- 0.810
- 0.794
- 0.787
- 0.775

Current Data Parameters  
 NAME 16ADMT007062H  
 EXPNO 1  
 PROCNO 1

F2 - Acquisition Parameters  
 Date\_ 20070516  
 Time\_ 9.13  
 INSTRUM spect  
 PROBHD 5 mm DUL 1H-13  
 PULPROG zgpg30  
 TD 29  
 FIDRES 0.094893 Hz  
 AQ 5.2691445 sec  
 RG 143.7  
 DE 80.400 usec  
 TE 300.0 K  
 D1 1.00000000 sec  
 TD0 1

==== CHANNEL F1 =====  
 NUC1 1H  
 P1 9.00 usec  
 PL1 1.00 dB  
 SF01 300.3818550 MHz

F2 - Processing parameters  
 SI 32768  
 SF 300.3799990 MHz  
 WDM no  
 SSB 0  
 LB 0.00 Hz  
 GB 0  
 PC 1.00

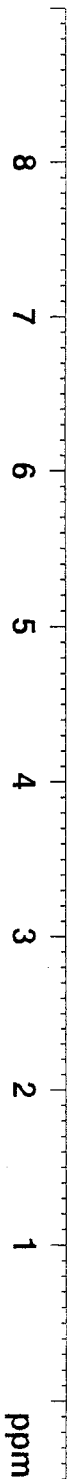

- 0.86
- 0.89
- 0.90
- 4.10
- 1.93
- 0.90
- 0.90
- 1.05
- 0.98
- 0.99
- 3.00
- 0.65
- 1.24
- 1.38
- 0.97
- 1.04
- 0.66
- 4.30
- 0.97

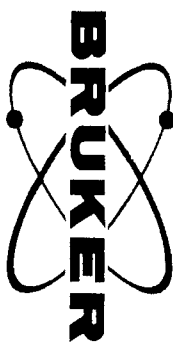

Current Data Parameters  
 NAME 16ADMT007066H  
 EXPNO 1  
 PROCNO 1

F2 - Acquisition Parameters

Date\_ 20070516  
 Time 9.30  
 INSTRUM spect  
 PROBHD 5 mm DUL 1H-13  
 PULPROG zg  
 TD 65536  
 SOLVENT CDCl3  
 NS 8  
 DS 2  
 SWH 6218.905 Hz  
 FIDRES 0.094893 Hz  
 AQ 5.2691445 sec  
 RG 128  
 DW 80.400 usec  
 DE 6.00 usec  
 TE 300.0 K  
 D1 1.00000000 sec  
 TD0 1

==== CHANNEL f1 =====

NUC1 1H  
 P1 9.00 usec  
 PL1 1.00 dB  
 SFO1 300.3818550 MHz

F2 - Processing parameters

SI 32768  
 SF 300.3799997 MHz  
 MDW no  
 SSB 0  
 LB 0.00 Hz  
 GB 0  
 PC 1.00

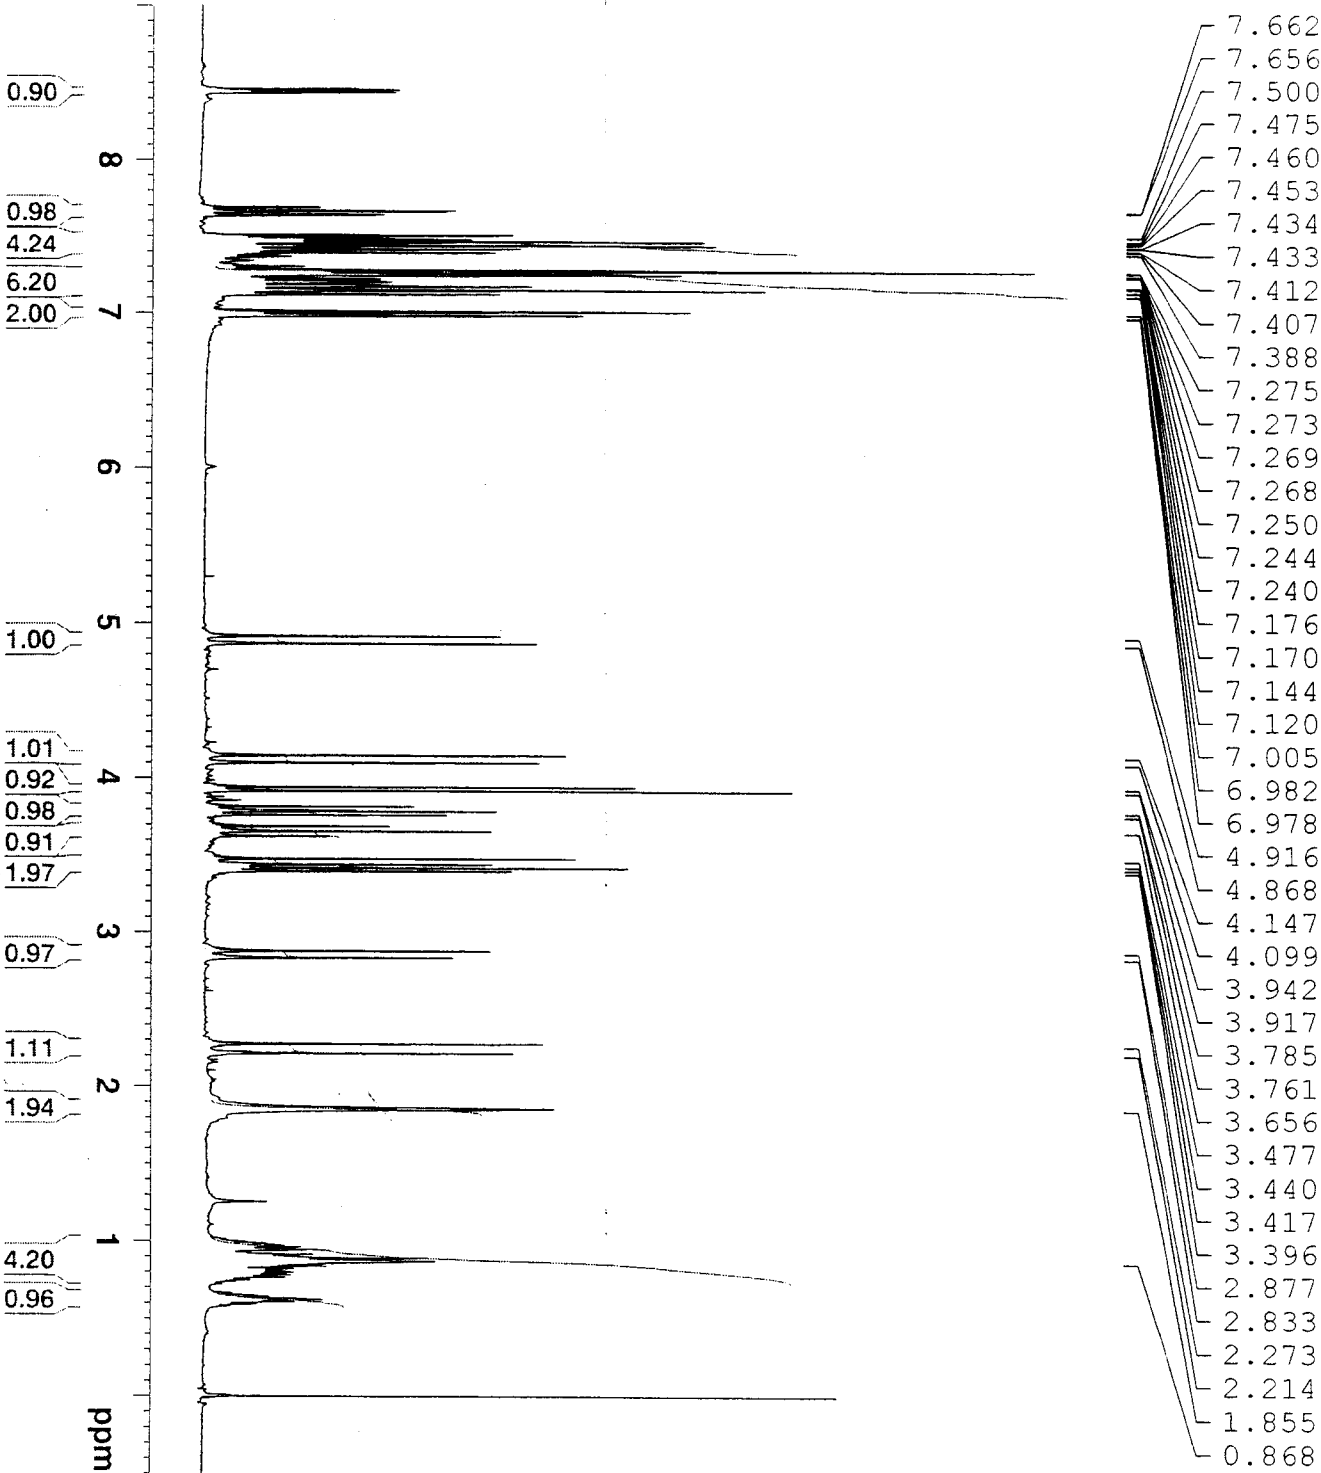

Supplement: NIHMS224873-supplement-Supp_Info_Final.pdf [file NIHMS224873-supplement-Supp_Info_Final.pdf]
